# Supplementary material for: Association Between FSIP2 Mutation and an Improved Efficacy of Immune Checkpoint Inhibitors in Patients With Skin Cutaneous Melanoma
Source: Front Mol Biosci. 2021 May 24;8:629330. doi: 10.3389/fmolb.2021.629330 (PMC8186463; doi:10.3389/fmolb.2021.629330)
Supplement: Supplementary file 1 [file Table_1.XLSX]

## Sheet: S1
TableS1:Clinical Data of MSKCC_SKCM
PATIENT_ID	FSIP2	Age	Gender	Response	OS_time	OS	PFS_time	PFS	histology	Drug Type	Other Concurrent Therapy	response	TMB		Variable	n mutant	category	PVal	ne
CR0095_T_N	1	NA	MALE	CR	69.35	1	15.1667	NA	cutaneous	Monotherapy	no	CR/PR	7.39474		Gender	15	response	0.560572	ns
CR04885_T_N	0	NA	FEMALE	CR	25.55	1	19.8333	NA	cutaneous	Monotherapy	no	CR/PR	52.7895		Drug Type	15	response	0.0757727	ns
CR06670_T_N	0	NA	FEMALE	CR	45.0167	0	39.2	NA	cutaneous	Monotherapy	no	CR/PR	16.7632		response	15	response	0.10112	ns
CR1509_T_N	1	NA	FEMALE	CR	54.75	1	16.8	NA	cutaneous	Monotherapy	no	CR/PR	15.6842
CR22640_T_N	0	NA	MALE	CR	52.3167	1	50.4	NA	cutaneous	Monotherapy	no	CR/PR	9.23684
CR3665_T_N	0	NA	MALE	CR	32.85	1	11.2	NA	cutaneous	Monotherapy	no	CR/PR	4.21053
CR6126_T_N	0	NA	FEMALE	CR	23.5667	1	23.5667	NA	cutaneous	Monotherapy	no	CR/PR	15.2105
CR6161_T_N	0	NA	MALE	CR	31.7333	0	31.7333	NA	cutaneous	Monotherapy	no	CR/PR	22.4737
CR9306_T_N	0	NA	MALE	CR	64.4833	1	9.8	NA	cutaneous	Monotherapy	no	CR/PR	38.0263
CR9699_T_N	1	NA	MALE	CR	53.5333	1	12.1333	NA	cutaneous	Monotherapy	no	CR/PR	34.8684
DFCI_MM_2-TP-NB-SM-BZRJA-SM-BZRJD	0	NA	FEMALE	CR	12.1667	1	12.1667	0	cutaneous	Monotherapy	no	CR/PR	31.5526
LSD0167_T_N	0	NA	MALE	SD	32.85	1	32.6667	NA	cutaneous	Monotherapy	no	PD/SD	11.2105
LSD2057_T_N	0	NA	FEMALE	SD	40.15	1	14.9333	NA	cutaneous	Monotherapy	no	PD/SD	4.65789
LSD3484_T_N	0	NA	MALE	SD	35.9333	1	35.9333	NA	cutaneous	Monotherapy	no	PD/SD	14.1316
LSD4744_T_N	0	NA	MALE	SD	25.55	1	18.6667	NA	cutaneous	Monotherapy	no	PD/SD	30.0263
LSD6819_T_N	0	NA	MALE	SD	41.3667	1	15.6333	NA	cutaneous	Monotherapy	no	PD/SD	5.63158
MEL-582186-TP-NB-SM-CN21Q-SM-CJP7T	0	NA	FEMALE	PR	13.8333	1	10.7667	0	cutaneous	Combotherapy	no	CR/PR	1.55263
MEL-587761-TP-NB-SM-CN1ZV-SM-CJP7Q	1	NA	MALE	SD	19.4667	1	6.2	0	cutaneous	Combotherapy	no	PD/SD	5.10526
MEL-650366-TP-NB-SM-CN221-SM-CJP7U	0	NA	FEMALE	PD	26.4667	1	1.4	0	cutaneous	Combotherapy	no	PD/SD	6.07895
MEL-682321-TP-NB-SM-CN21G-SM-CJP7S	1	NA	FEMALE	PR	14.9	1	14.9	1	cutaneous	Combotherapy	no	CR/PR	27
MEL-IPI_Pat03-TP-NB-SM-4DJZY-SM-4NFU5	0	61	FEMALE	PD	3.33333	0	2.53333	0	cutaneous	Monotherapy	no	PD/SD	12.0263
MEL-IPI_Pat04-TP-NB-SM-4DJZZ-SM-4NFU6	0	71	MALE	PR	32.9	1	21.5333	1	cutaneous	Monotherapy	no	CR/PR	11
MEL-IPI_Pat06-TP-NB-SM-4DK12-SM-4NFU8	0	33	MALE	PD	5.36667	0	2.56667	0	cutaneous	Monotherapy	no	PD/SD	4.05263
MEL-IPI_Pat07-TP-NB-SM-4DK13-SM-4NFU9	0	35	MALE	SD	35	1	24.0333	1	cutaneous	Monotherapy	no	PD/SD	4.73684
MEL-IPI_Pat100-TP-NT-SM-53U2D-SM-53U4M	0	71	MALE	PD	12	0	3.7	0	cutaneous	Monotherapy	no	PD/SD	14.7368
MEL-IPI_Pat101-TP-NT-SM-4CU6O-SM-53U4N	0	75	MALE	PD	9.6	0	2.56667	0	cutaneous	Monotherapy	no	PD/SD	1.89474
MEL-IPI_Pat104-TP-NT-SM-4CU6R-SM-53U4Q	0	45	FEMALE	SD	7.9	0	7.9	0	cutaneous	Monotherapy	no	PD/SD	0.973684
MEL-IPI_Pat105-TP-NT-SM-4CU6S-SM-53U4R	0	41	MALE	PR	34.9	1	23	1	cutaneous	Monotherapy	no	CR/PR	3.81579
MEL-IPI_Pat106-TP-NT-SM-4CU6T-SM-4MGPK	0	43	FEMALE	PD	8.33333	0	4.56667	0	cutaneous	Monotherapy	no	PD/SD	0.605263
MEL-IPI_Pat110-TP-NT-SM-4CU6X-SM-4MGPO	1	76	MALE	PD	10.6667	0	2.43333	0	cutaneous	Monotherapy	no	PD/SD	173.289
MEL-IPI_Pat111-TP-NT-SM-4CU6Y-SM-4MGPP	0	84	MALE	PD	20.6	0	15.5667	0	cutaneous	Monotherapy	no	PD/SD	36.8158
MEL-IPI_Pat115-TP-NT-SM-5X2QS-SM-5X2RA	0	46	MALE	PD	4.83333	0	2.46667	0	cutaneous	Monotherapy	no	PD/SD	1.94737
MEL-IPI_Pat117-TP-NT-SM-5X2QU-SM-5X2RC	0	74	MALE	PR	30.4667	1	6.06667	1	cutaneous	Monotherapy	no	CR/PR	18.8947
MEL-IPI_Pat118-TP-NT-SM-5X2QV-SM-5X2RD	0	43	FEMALE	PD	10.4333	0	4	0	cutaneous	Monotherapy	no	PD/SD	3.26316
MEL-IPI_Pat119-TP-NT-SM-7459N-SM-7459Q	0	61	MALE	PD	26.9333	1	3.6	1	cutaneous	Monotherapy	no	PD/SD	8.39474
MEL-IPI_Pat12-TP-NB-SM-7459O-SM-4NFUE	0	41	MALE	PD	9.66667	0	2.8	0	cutaneous	Monotherapy	no	PD/SD	2.71053
MEL-IPI_Pat124-TP-NB-SM-7459L-SM-5VWHM	0	78	MALE	PD	4.86667	0	2.23333	0	cutaneous	Monotherapy	no	PD/SD	10.7895
MEL-IPI_Pat126-TP-NB-SM-5X2R4-SM-5VWHO	0	77	MALE	PR	21.3667	1	6.23333	1	cutaneous	Monotherapy	no	CR/PR	11.3158
MEL-IPI_Pat127-TP-NB-SM-5X2R5-SM-5VWHP	0	24	FEMALE	PD	11.0667	0	4	0	cutaneous	Monotherapy	no	PD/SD	3.21053
MEL-IPI_Pat128-TP-NB-SM-5X2R6-SM-5VWHQ	0	30	MALE	PD	3.76667	0	2.7	0	cutaneous	Monotherapy	no	PD/SD	2.15789
MEL-IPI_Pat129-TP-NT-SM-5X2R7-SM-5X2RI	0	18	MALE	PD	17.9667	1	2.26667	1	cutaneous	Monotherapy	no	PD/SD	3
MEL-IPI_Pat13-TP-NB-SM-4DK19-SM-4NFUF	0	78	MALE	PD	24.4	0	3.46667	0	cutaneous	Monotherapy	no	PD/SD	3.42105
MEL-IPI_Pat132-TP-NB-SM-5VWJA-SM-5VWHR	0	81	MALE	PR	22.5333	1	6.23333	1	cutaneous	Monotherapy	no	CR/PR	61.1316
MEL-IPI_Pat134-TP-NB-SM-5VWJC-SM-5VWHT	0	73	MALE	PD	10.0667	0	2.4	0	cutaneous	Monotherapy	no	PD/SD	10.5
MEL-IPI_Pat135-TP-NB-SM-7A152-SM-5VWHU	0	29	FEMALE	PD	2.7	0	2.43333	0	cutaneous	Monotherapy	no	PD/SD	4.78947
MEL-IPI_Pat138-TP-NB-SM-7A155-SM-5VWHX	1	39	FEMALE	SD	49.2667	0	19.3667	0	cutaneous	Monotherapy	no	PD/SD	157.526
MEL-IPI_Pat139-TP-NB-SM-5VWJH-SM-5VWHY	0	58	MALE	PD	3.3	0	1.53333	0	cutaneous	Monotherapy	no	PD/SD	37.2105
MEL-IPI_Pat14-TP-NB-SM-53U3C-SM-4NFUG	0	47	FEMALE	PD	5.43333	0	2.8	0	cutaneous	Monotherapy	no	PD/SD	1.36842
MEL-IPI_Pat140-TP-NB-SM-5VWJI-SM-5VWHZ	0	62	MALE	PD	16.4	0	3.8	0	cutaneous	Monotherapy	no	PD/SD	8.84211
MEL-IPI_Pat143-TP-NB-SM-7A156-SM-5VWI3	1	71	MALE	PD	5.1	0	3	0	cutaneous	Monotherapy	no	PD/SD	24.9737
MEL-IPI_Pat144-TP-NB-SM-7A157-SM-5VWI4	1	65	MALE	PR	29	0	24.3667	0	cutaneous	Monotherapy	no	CR/PR	7.15789
MEL-IPI_Pat148-TP-NB-SM-5VWJQ-SM-5VWI8	0	36	FEMALE	PD	2.8	0	1.6	0	cutaneous	Monotherapy	no	PD/SD	6.86842
MEL-IPI_Pat15-TP-NB-SM-4DK1B-SM-4NFUH	0	32	MALE	PD	1.66667	0	1.03333	0	cutaneous	Monotherapy	no	PD/SD	6.71053
MEL-IPI_Pat151-TP-NB-SM-7A15A-SM-5VWIB	0	68	MALE	PD	6.8	0	3.53333	0	cutaneous	Monotherapy	no	PD/SD	68.8158
MEL-IPI_Pat157-TP-NB-SM-7A15B-SM-5VWIH	0	69	FEMALE	NA	2.86667	0	1.76667	0	cutaneous	Monotherapy	no	PD/SD	3.63158
MEL-IPI_Pat159-TP-NB-SM-5VWK2-SM-5VWIJ	0	52	MALE	PD	28.0667	1	3.33333	1	cutaneous	Monotherapy	no	PD/SD	15.2368
MEL-IPI_Pat16-TP-NT-SM-53U3E-SM-53U5B	0	68	FEMALE	PD	27.0333	0	2.8	0	cutaneous	Monotherapy	no	PD/SD	50.8684
MEL-IPI_Pat160-TP-NB-SM-5VWK3-SM-5VWIK	0	79	MALE	PD	5.06667	0	2.7	0	cutaneous	Monotherapy	no	PD/SD	1.44737
MEL-IPI_Pat167-TP-NB-SM-7A15H-SM-5VWIR	0	50	MALE	PD	13.6	0	2.8	0	cutaneous	Monotherapy	no	PD/SD	1.60526
MEL-IPI_Pat168-TP-NB-SM-5VOAX-SM-5VWIS	0	69	MALE	NA	2.23333	0	2.23333	0	cutaneous	Monotherapy	no	PD/SD	7.13158
MEL-IPI_Pat17-TP-NB-SM-4DK1D-SM-4NFUJ	0	44	MALE	PD	6.83333	0	2.83333	0	cutaneous	Monotherapy	no	PD/SD	5.65789
MEL-IPI_Pat170-TP-NB-SM-5VOAZ-SM-5VWIU	0	48	MALE	PD	3.6	0	3.23333	0	cutaneous	Monotherapy	no	PD/SD	5.97368
MEL-IPI_Pat171-TP-NB-SM-7A15J-SM-5VWIV	0	66	MALE	PD	15.5333	0	2.83333	0	cutaneous	Monotherapy	no	PD/SD	2.36842
MEL-IPI_Pat174-TP-NB-SM-5VOB4-SM-5VWIY	0	57	FEMALE	PR	22.9333	1	4.46667	1	cutaneous	Monotherapy	no	CR/PR	17.6579
MEL-IPI_Pat175-TP-NB-SM-7A15L-SM-5VWIZ	0	66	FEMALE	NA	3	0	3	0	cutaneous	Monotherapy	no	PD/SD	2.92105
MEL-IPI_Pat18-TP-NT-SM-4DK1E-SM-53U5D	0	55	FEMALE	PD	37.8	1	3.73333	0	cutaneous	Monotherapy	no	PD/SD	1.02632
MEL-IPI_Pat21-TP-NT-SM-4DK1H-SM-53U5G	0	81	MALE	SD	22.5333	0	18.6	0	cutaneous	Monotherapy	no	PD/SD	38.1842
MEL-IPI_Pat24-TP-NT-SM-4DK1K-SM-53U5J	1	74	FEMALE	PR	32.3667	1	21.9333	1	cutaneous	Monotherapy	no	CR/PR	1
MEL-IPI_Pat27-TP-NB-SM-4DK1N-SM-4NFUT	0	61	MALE	PD	45.9667	1	4.63333	0	cutaneous	Monotherapy	no	PD/SD	1.26316
MEL-IPI_Pat39-TP-NB-SM-4DK1Z-SM-4NFV6	0	67	MALE	CR	49.5667	1	49.5667	1	cutaneous	Monotherapy	no	CR/PR	2.10526
MEL-IPI_Pat41-TP-NT-SM-4DK22-SM-53U5O	0	64	MALE	PD	4.26667	0	1.8	0	cutaneous	Monotherapy	no	PD/SD	9.57895
MEL-IPI_Pat43-TP-NB-SM-4DK24-SM-4NFVA	0	75	FEMALE	PD	1.23333	0	1.23333	0	cutaneous	Monotherapy	no	PD/SD	5.92105
MEL-IPI_Pat45-TP-NT-SM-4DK26-SM-53U5R	0	69	MALE	PD	2.96667	0	2.03333	0	cutaneous	Monotherapy	no	PD/SD	24.8947
MEL-IPI_Pat47-TP-NT-SM-4DK28-SM-53U5U	0	78	MALE	CR	36.8667	1	36.8667	1	cutaneous	Monotherapy	no	CR/PR	4.10526
MEL-IPI_Pat49-TP-NT-SM-4DK2A-SM-53U5W	0	36	MALE	SD	34.4667	1	5.43333	0	cutaneous	Monotherapy	no	PD/SD	18.1579
MEL-IPI_Pat50-TP-NT-SM-53U69-SM-53U5X	0	77	MALE	PD	2.16667	0	2.16667	0	cutaneous	Monotherapy	no	PD/SD	11.8684
MEL-IPI_Pat52-TP-NT-SM-4DK2D-SM-53U5Z	0	65	MALE	PD	6.3	0	2.26667	0	cutaneous	Monotherapy	no	PD/SD	10.4737
MEL-IPI_Pat54-TP-NB-SM-4DK2F-SM-4NFVL	0	73	MALE	PD	6.93333	0	2.7	0	cutaneous	Monotherapy	no	PD/SD	23.8684
MEL-IPI_Pat55-TP-NB-SM-4DK2G-SM-4NFVM	0	71	FEMALE	PD	6.43333	0	2.6	0	cutaneous	Monotherapy	no	PD/SD	14.0526
MEL-IPI_Pat56-TP-NB-SM-4DK2H-SM-4NFVN	0	68	MALE	PD	7.83333	0	3.2	0	cutaneous	Monotherapy	no	PD/SD	1.47368
MEL-IPI_Pat57-TP-NB-SM-4DK2I-SM-4NFVO	0	69	MALE	PD	8.33333	0	2.26667	0	cutaneous	Monotherapy	no	PD/SD	1.76316
MEL-IPI_Pat58-TP-NB-SM-4DK2J-SM-4NFVP	0	59	FEMALE	PD	21.7333	0	3.3	0	cutaneous	Monotherapy	no	PD/SD	72.7632
MEL-IPI_Pat59-TP-NB-SM-4DK2K-SM-4NFVQ	0	36	MALE	PD	7.46667	0	2.53333	0	cutaneous	Monotherapy	no	PD/SD	7.36842
MEL-IPI_Pat60-TP-NB-SM-4DK2L-SM-4NFVR	1	86	MALE	PD	9.06667	0	2.96667	0	cutaneous	Monotherapy	no	PD/SD	20.5789
MEL-IPI_Pat62-TP-NB-SM-4DK2N-SM-4NFVT	1	76	MALE	PD	20.0667	0	2.56667	0	cutaneous	Monotherapy	no	PD/SD	45.1316
MEL-IPI_Pat64-TP-NB-SM-4DK2P-SM-4NFVV	0	83	MALE	PD	3.53333	0	2.3	0	cutaneous	Monotherapy	no	PD/SD	17.8684
MEL-IPI_Pat66-TP-NB-SM-4DK2R-SM-4NFVX	0	44	FEMALE	SD	21.7667	1	19.9333	0	cutaneous	Monotherapy	no	PD/SD	8.71053
MEL-IPI_Pat67-TP-NB-SM-4DK2S-SM-4NFVY	0	40	MALE	PD	2.63333	0	2.63333	0	cutaneous	Monotherapy	no	PD/SD	0.815789
MEL-IPI_Pat73-TP-NB-SM-4DK2Y-SM-4NFW5	0	71	MALE	PR	14.7333	0	13.6	0	cutaneous	Monotherapy	no	CR/PR	6.15789
MEL-IPI_Pat74-TP-NB-SM-4DK2Z-SM-4NFW6	0	73	MALE	PD	6.43333	0	2.66667	0	cutaneous	Monotherapy	no	PD/SD	14.2368
MEL-IPI_Pat79-TP-NB-SM-53U2S-SM-4NFWB	0	69	MALE	PR	26.7	0	13.5	0	cutaneous	Monotherapy	no	CR/PR	8.15789
MEL-IPI_Pat80-TP-NT-SM-4DK36-SM-53U53	0	47	MALE	SD	24.1333	0	6.06667	0	cutaneous	Monotherapy	no	PD/SD	6
MEL-IPI_Pat82-TP-NT-SM-4DK38-SM-53U55	1	54	FEMALE	PD	3.46667	0	2.5	0	cutaneous	Monotherapy	no	PD/SD	11.7895
MEL-IPI_Pat83-TP-NT-SM-53U2W-SM-53U56	0	22	MALE	PD	34.2333	1	3.56667	0	cutaneous	Monotherapy	no	PD/SD	1.5
MEL-IPI_Pat85-TP-NB-SM-53U2Y-SM-4NFWH	1	83	MALE	PD	15.2667	0	2.76667	0	cutaneous	Monotherapy	no	PD/SD	14.0526
MEL-IPI_Pat86-TP-NT-SM-4DK3C-SM-53U59	0	54	MALE	SD	9.76667	0	5.1	0	cutaneous	Monotherapy	no	PD/SD	2.15789
MEL-IPI_Pat87-TP-NT-SM-4DK3D-SM-53U5A	0	47	MALE	PD	36.4333	1	5.03333	0	cutaneous	Monotherapy	no	PD/SD	1.07895
MEL-IPI_Pat90-TP-NB-SM-4DK3G-SM-4NFWM	0	59	MALE	PR	33.5	1	22.3	1	cutaneous	Monotherapy	no	CR/PR	5.97368
MEL-IPI_Pat98-TP-NT-SM-4CU6L-SM-53U4K	0	57	FEMALE	PD	4.66667	0	2.56667	0	cutaneous	Monotherapy	no	PD/SD	1.84211
NR1867_T_N	0	NA	MALE	PD	18.25	1	5.36667	1	cutaneous	Monotherapy	no	PD/SD	2.34211
NR2137_T_N	0	NA	MALE	PD	9.73333	1	1.86667	1	cutaneous	Monotherapy	no	PD/SD	17.0789
NR3549_T_N	0	NA	MALE	PD	6.08333	1	3.73333	1	cutaneous	Monotherapy	no	PD/SD	10.8947
NR4045_T_N	0	NA	MALE	PD	20.6833	1	2.56667	1	cutaneous	Monotherapy	no	PD/SD	11.7632
NR4631_T_N	0	NA	MALE	PD	6.08333	1	3.03333	1	cutaneous	Monotherapy	no	PD/SD	30.5526
NR4810_T_N	0	NA	FEMALE	PD	4.86667	1	2.8	1	cutaneous	Monotherapy	no	PD/SD	10.1579
NR8815_T_N	0	NA	FEMALE	PD	14.6	1	2.1	1	cutaneous	Monotherapy	no	PD/SD	45.5
NR9445_T_N	0	NA	MALE	PD	2.43333	1	1.86667	1	cutaneous	Monotherapy	yes	PD/SD	6.97368
NR9449_T_N	0	NA	FEMALE	PD	7.3	1	2.33333	1	cutaneous	Monotherapy	no	PD/SD	7.92105
NR9521_T_N	0	NA	MALE	PD	32.85	1	2.8	1	cutaneous	Monotherapy	no	PD/SD	29.0263
NR9705_T_N	0	NA	FEMALE	PD	14.6	1	6.76667	1	cutaneous	Monotherapy	no	PD/SD	0.710526
NR9765_T_N	0	NA	FEMALE	PD	25.55	1	5.13333	1	cutaneous	Monotherapy	no	PD/SD	2.15789
PR12117_T_N	0	NA	MALE	PR	19.4667	0	17.0333	1	cutaneous	Monotherapy	no	CR/PR	30.0526
SD0346_T_N	1	NA	FEMALE	SD	35.2833	0	15.8667	1	cutaneous	Monotherapy	yes	PD/SD	15.4211
SD1494_T_N	0	NA	MALE	SD	24.3333	1	11.9	1	cutaneous	Monotherapy	no	PD/SD	24.8158
SD2051_T_N	0	NA	FEMALE	SD	9.73333	0	3.73333	1	cutaneous	Monotherapy	yes	PD/SD	0.947368
SD2056_T_N	0	NA	FEMALE	SD	48.5333	1	48.5333	1	cutaneous	Monotherapy	no	PD/SD	4.10526
SD5038_T_N	0	NA	MALE	SD	14.6	0	5.6	1	cutaneous	Monotherapy	no	PD/SD	7.57895
SD5118_T_N	0	NA	FEMALE	SD	32.85	0	5.6	1	cutaneous	Monotherapy	no	PD/SD	1.94737
SD5934_T_N	0	NA	MALE	SD	19.4667	0	3.26667	1	cutaneous	Monotherapy	no	PD/SD	4.47368
SD6336_T_N	0	NA	MALE	SD	84.2333	1	84.2333	1	cutaneous	Monotherapy	no	PD/SD	9.36842

## Sheet: S2
TableS2:Clinical Data of TCGA_SKCM
bcr_patient_barcode	FSIP2	Gender	OS	OS_Time	Race	Age	ethnicity	Stage		Variable	n mutant	category	PVal	ne
TCGA-3N-A9WB	0	Male	DECEASED	17.02	WHITE	71	NOT HISPANIC OR LATINO	Stage I		Gender	58	response	0.0434658	*
TCGA-3N-A9WC	0	Male	LIVING	66.43	WHITE	82	NOT HISPANIC OR LATINO	Stage II		Race	58	response	1	ns
TCGA-3N-A9WD	0	Male	DECEASED	12.98	WHITE	82	NOT HISPANIC OR LATINO	Stage III		ethnicity	58	response	1	ns
TCGA-BF-A1PU	0	Female	LIVING	12.71	WHITE	46	NA	Stage II		Stage	58	response	0.657896	ns
TCGA-BF-A1PV	0	Female	LIVING	0.46	WHITE	74	NA	Stage II
TCGA-BF-A1PX	0	Male	DECEASED	9.26	WHITE	56	NOT HISPANIC OR LATINO	Stage III
TCGA-BF-A1PZ	0	Female	LIVING	28.02	WHITE	71	NOT HISPANIC OR LATINO	Stage II
TCGA-BF-A1Q0	1	Male	LIVING	27.3	WHITE	80	NOT HISPANIC OR LATINO	Stage II
TCGA-BF-A3DJ	0	Female	LIVING	15.24	WHITE	36	NA	Stage III
TCGA-BF-A3DL	0	Female	LIVING	25.26	WHITE	84	NOT HISPANIC OR LATINO	Stage III
TCGA-BF-A3DM	0	Male	LIVING	19.74	WHITE	63	NOT HISPANIC OR LATINO	Stage II
TCGA-BF-A3DN	0	Female	LIVING	23.55	WHITE	81	HISPANIC OR LATINO	Stage III
TCGA-BF-A5EO	1	Male	LIVING	23.09	WHITE	65	NOT HISPANIC OR LATINO	Stage II
TCGA-BF-A5EP	0	Female	LIVING	11.01	WHITE	75	NOT HISPANIC OR LATINO	Stage III
TCGA-BF-A5EQ	1	Male	LIVING	10.61	WHITE	63	NOT HISPANIC OR LATINO	Stage II
TCGA-BF-A5ER	0	Male	LIVING	10.74	WHITE	63	NOT HISPANIC OR LATINO	Stage II
TCGA-BF-A5ES	0	Female	LIVING	16.1	WHITE	76	NOT HISPANIC OR LATINO	Stage II
TCGA-BF-A9VF	0	Male	LIVING	14.45	WHITE	77	NOT HISPANIC OR LATINO	Stage II
TCGA-BF-AAOU	0	Female	LIVING	15.64	WHITE	73	NOT HISPANIC OR LATINO	Stage II
TCGA-BF-AAOX	0	Male	LIVING	14.59	WHITE	83	NOT HISPANIC OR LATINO	Stage II
TCGA-BF-AAP0	0	Female	LIVING	14.91	WHITE	40	NOT HISPANIC OR LATINO	Stage IV
TCGA-BF-AAP1	0	Male	LIVING	13.44	WHITE	86	NOT HISPANIC OR LATINO	Stage II
TCGA-BF-AAP2	0	Male	LIVING	13.3	WHITE	62	NOT HISPANIC OR LATINO	Stage II
TCGA-BF-AAP4	1	Male	LIVING	11.01	WHITE	61	NOT HISPANIC OR LATINO	Stage II
TCGA-BF-AAP6	0	Male	LIVING	10.68	WHITE	55	NOT HISPANIC OR LATINO	Stage III
TCGA-BF-AAP7	0	Female	LIVING	10.45	WHITE	76	NOT HISPANIC OR LATINO	Stage II
TCGA-BF-AAP8	0	Male	LIVING	14.68	WHITE	58	NOT HISPANIC OR LATINO	Stage II
TCGA-D3-A1Q1	0	Female	DECEASED	16.56	WHITE	79	NOT HISPANIC OR LATINO	Stage III
TCGA-D3-A1Q3	0	Male	DECEASED	16.66	WHITE	64	NOT HISPANIC OR LATINO	Stage II
TCGA-D3-A1Q4	0	Female	LIVING	111.96	WHITE	53	NOT HISPANIC OR LATINO	Stage III
TCGA-D3-A1Q5	0	Male	DECEASED	112.48	WHITE	60	NOT HISPANIC OR LATINO	I/II NOS
TCGA-D3-A1Q6	0	Male	DECEASED	71.75	WHITE	55	NOT HISPANIC OR LATINO	Stage III
TCGA-D3-A1Q7	0	Female	LIVING	133.15	WHITE	42	NOT HISPANIC OR LATINO	Stage I
TCGA-D3-A1Q8	0	Male	DECEASED	28.06	WHITE	33	NOT HISPANIC OR LATINO	Stage IV
TCGA-D3-A1Q9	0	Male	DECEASED	31.57	WHITE	72	NOT HISPANIC OR LATINO	Stage III
TCGA-D3-A1QA	0	Male	LIVING	90.83	WHITE	55	NOT HISPANIC OR LATINO	Stage I
TCGA-D3-A1QB	0	Female	LIVING	95.66	WHITE	75	NOT HISPANIC OR LATINO	Stage III
TCGA-D3-A2J6	0	Male	DECEASED	43.4	WHITE	65	NOT HISPANIC OR LATINO	Stage II
TCGA-D3-A2J7	0	Male	DECEASED	103.02	WHITE	67	NOT HISPANIC OR LATINO	Stage III
TCGA-D3-A2J8	0	Male	DECEASED	65.44	WHITE	48	NOT HISPANIC OR LATINO	Stage I
TCGA-D3-A2J9	0	Male	DECEASED	23.75	WHITE	75	NOT HISPANIC OR LATINO	Stage III
TCGA-D3-A2JA	0	Male	LIVING	115.44	WHITE	68	NOT HISPANIC OR LATINO	Stage III
TCGA-D3-A2JB	0	Female	DECEASED	167.87	BLACK OR AFRICAN AMERICAN	70	NOT HISPANIC OR LATINO	Stage 0
TCGA-D3-A2JC	0	Female	LIVING	86.7	WHITE	53	NOT HISPANIC OR LATINO	Stage III
TCGA-D3-A2JD	0	Male	DECEASED	11.86	WHITE	58	NOT HISPANIC OR LATINO	Stage III
TCGA-D3-A2JE	0	Female	DECEASED	27.63	WHITE	75	NOT HISPANIC OR LATINO	Stage III
TCGA-D3-A2JF	0	Male	LIVING	62.02	WHITE	74	NOT HISPANIC OR LATINO	Stage I
TCGA-D3-A2JG	0	Female	DECEASED	113.44	WHITE	30	NOT HISPANIC OR LATINO	Stage III
TCGA-D3-A2JH	0	Male	LIVING	42.05	WHITE	68	NOT HISPANIC OR LATINO	Stage I
TCGA-D3-A2JK	0	Male	DECEASED	12.09	WHITE	24	NOT HISPANIC OR LATINO	Stage III
TCGA-D3-A2JL	0	Female	LIVING	171.45	WHITE	43	NOT HISPANIC OR LATINO	I/II NOS
TCGA-D3-A2JN	0	Female	DECEASED	66.43	WHITE	46	NOT HISPANIC OR LATINO	Stage III
TCGA-D3-A2JO	0	Female	LIVING	66.03	WHITE	50	NOT HISPANIC OR LATINO	Stage III
TCGA-D3-A2JP	0	Male	LIVING	59.53	WHITE	37	NOT HISPANIC OR LATINO	Stage III
TCGA-D3-A3BZ	0	Male	LIVING	130.62	WHITE	63	HISPANIC OR LATINO	Stage II
TCGA-D3-A3C1	0	Male	LIVING	NA	WHITE	NA	NOT HISPANIC OR LATINO	I/II NOS
TCGA-D3-A3C3	0	Female	LIVING	NA	WHITE	NA	NOT HISPANIC OR LATINO	I/II NOS
TCGA-D3-A3C6	0	Female	DECEASED	58.02	WHITE	54	NOT HISPANIC OR LATINO	Stage I
TCGA-D3-A3C7	1	Female	LIVING	46.94	WHITE	57	NOT HISPANIC OR LATINO	Stage III
TCGA-D3-A3C8	0	Female	LIVING	46.29	WHITE	58	NOT HISPANIC OR LATINO	Stage III
TCGA-D3-A3CB	1	Male	LIVING	166.39	WHITE	39	NOT HISPANIC OR LATINO	I/II NOS
TCGA-D3-A3CC	0	Female	LIVING	86.86	WHITE	69	NOT HISPANIC OR LATINO	Stage II
TCGA-D3-A3CE	0	Female	DECEASED	60.18	WHITE	74	NOT HISPANIC OR LATINO	Stage III
TCGA-D3-A3CF	0	Female	DECEASED	24.51	WHITE	61	NOT HISPANIC OR LATINO	Stage III
TCGA-D3-A3ML	0	Male	DECEASED	13.86	WHITE	70	NOT HISPANIC OR LATINO	Stage III
TCGA-D3-A3MO	0	Male	DECEASED	9.33	WHITE	47	NOT HISPANIC OR LATINO	Stage III
TCGA-D3-A3MR	0	Male	LIVING	103.52	WHITE	42	NOT HISPANIC OR LATINO	Stage III
TCGA-D3-A3MU	0	Male	LIVING	39.72	WHITE	53	NOT HISPANIC OR LATINO	Stage III
TCGA-D3-A3MV	0	Female	LIVING	45.27	WHITE	38	NOT HISPANIC OR LATINO	Stage III
TCGA-D3-A51E	0	Female	LIVING	174.7	WHITE	39	NOT HISPANIC OR LATINO	I/II NOS
TCGA-D3-A51F	0	Male	LIVING	55.68	WHITE	51	NOT HISPANIC OR LATINO	Stage III
TCGA-D3-A51G	0	Male	LIVING	NA	WHITE	NA	NOT HISPANIC OR LATINO	Stage 0
TCGA-D3-A51H	0	Male	LIVING	56.31	WHITE	60	NOT HISPANIC OR LATINO	Stage III
TCGA-D3-A51J	0	Male	LIVING	145.01	WHITE	19	NOT HISPANIC OR LATINO	Stage III
TCGA-D3-A51K	0	Male	LIVING	32.92	WHITE	51	HISPANIC OR LATINO	Stage III
TCGA-D3-A51N	0	Female	LIVING	22.6	WHITE	56	NOT HISPANIC OR LATINO	Stage IV
TCGA-D3-A51R	0	Male	LIVING	63.76	WHITE	60	NOT HISPANIC OR LATINO	Stage II
TCGA-D3-A51T	0	Female	LIVING	26.87	WHITE	59	NOT HISPANIC OR LATINO	Stage III
TCGA-D3-A5GL	0	Male	LIVING	125.69	WHITE	74	NOT HISPANIC OR LATINO	Stage I
TCGA-D3-A5GN	0	Female	LIVING	135.64	WHITE	15	NOT HISPANIC OR LATINO	Stage I
TCGA-D3-A5GO	0	Male	LIVING	137.81	WHITE	61	NOT HISPANIC OR LATINO	Stage II
TCGA-D3-A5GR	0	Female	LIVING	178.19	WHITE	23	NOT HISPANIC OR LATINO	Stage III
TCGA-D3-A5GS	0	Male	LIVING	18.17	WHITE	58	NOT HISPANIC OR LATINO	Stage IV
TCGA-D3-A5GT	0	Male	LIVING	16	WHITE	43	HISPANIC OR LATINO	Stage III
TCGA-D3-A5GU	1	Male	LIVING	125.1	WHITE	36	NOT HISPANIC OR LATINO	Stage I
TCGA-D3-A8GB	0	Male	DECEASED	30.81	WHITE	48	NOT HISPANIC OR LATINO	Stage III
TCGA-D3-A8GC	1	Male	DECEASED	79.53	WHITE	48	NOT HISPANIC OR LATINO	Stage III
TCGA-D3-A8GD	0	Female	LIVING	23.59	WHITE	63	NOT HISPANIC OR LATINO	Stage III
TCGA-D3-A8GE	0	Male	LIVING	26.41	WHITE	26	HISPANIC OR LATINO	Stage IV
TCGA-D3-A8GI	1	Male	DECEASED	58.48	WHITE	68	NOT HISPANIC OR LATINO	Stage I
TCGA-D3-A8GJ	0	Male	LIVING	241.2	WHITE	18	NOT HISPANIC OR LATINO	Stage II
TCGA-D3-A8GK	0	Male	LIVING	170.07	WHITE	45	NOT HISPANIC OR LATINO	Stage II
TCGA-D3-A8GL	1	Male	DECEASED	89.06	WHITE	43	NOT HISPANIC OR LATINO	Stage III
TCGA-D3-A8GM	1	Male	DECEASED	107.06	WHITE	73	NOT HISPANIC OR LATINO	Stage II
TCGA-D3-A8GN	0	Female	LIVING	160.87	WHITE	27	NOT HISPANIC OR LATINO	I/II NOS
TCGA-D3-A8GO	0	Female	DECEASED	NA	WHITE	NA	HISPANIC OR LATINO	I/II NOS
TCGA-D3-A8GP	0	Male	LIVING	152.63	WHITE	77	NOT HISPANIC OR LATINO	Stage III
TCGA-D3-A8GQ	0	Male	DECEASED	29.04	WHITE	66	NOT HISPANIC OR LATINO	Stage II
TCGA-D3-A8GR	0	Female	DECEASED	129.53	WHITE	54	NOT HISPANIC OR LATINO	Stage 0
TCGA-D3-A8GS	0	Male	DECEASED	117.08	WHITE	52	NOT HISPANIC OR LATINO	Stage I
TCGA-D3-A8GV	0	Male	DECEASED	167.58	WHITE	25	NOT HISPANIC OR LATINO	I/II NOS
TCGA-D9-A148	0	Male	LIVING	151.41	WHITE	40	NOT HISPANIC OR LATINO	NA
TCGA-D9-A149	0	Female	LIVING	54.63	WHITE	65	NOT HISPANIC OR LATINO	NA
TCGA-D9-A1JW	0	Male	LIVING	3.65	WHITE	82	NOT HISPANIC OR LATINO	NA
TCGA-D9-A1JX	0	Female	DECEASED	7.1	WHITE	80	NOT HISPANIC OR LATINO	NA
TCGA-D9-A1X3	0	Male	LIVING	18.1	WHITE	63	NOT HISPANIC OR LATINO	NA
TCGA-D9-A3Z1	0	Male	DECEASED	15.37	WHITE	66	NOT HISPANIC OR LATINO	Stage III
TCGA-D9-A3Z3	0	Female	LIVING	22.27	WHITE	39	NOT HISPANIC OR LATINO	Stage III
TCGA-D9-A3Z4	0	Male	DECEASED	17.05	WHITE	54	NOT HISPANIC OR LATINO	Stage III
TCGA-D9-A4Z2	0	Male	DECEASED	6.24	WHITE	50	NOT HISPANIC OR LATINO	Stage III
TCGA-D9-A4Z3	1	Female	LIVING	16.59	WHITE	73	NOT HISPANIC OR LATINO	Stage III
TCGA-D9-A4Z5	0	Male	LIVING	7.16	WHITE	68	NOT HISPANIC OR LATINO	Stage II
TCGA-D9-A4Z6	0	Male	DECEASED	18.43	WHITE	54	NOT HISPANIC OR LATINO	Stage III
TCGA-D9-A6E9	0	Female	LIVING	9.89	WHITE	75	NOT HISPANIC OR LATINO	Stage III
TCGA-D9-A6EA	0	Male	LIVING	25.16	WHITE	70	NOT HISPANIC OR LATINO	Stage III
TCGA-D9-A6EC	1	Male	LIVING	77.5	WHITE	56	NOT HISPANIC OR LATINO	Stage III
TCGA-D9-A6EG	0	Male	DECEASED	22.93	WHITE	56	NOT HISPANIC OR LATINO	Stage III
TCGA-DA-A1HV	0	Female	LIVING	76.51	WHITE	75	NOT HISPANIC OR LATINO	Stage III
TCGA-DA-A1HW	0	Female	DECEASED	36.01	WHITE	37	NOT HISPANIC OR LATINO	Stage III
TCGA-DA-A1HY	0	Male	LIVING	144.78	WHITE	42	NOT HISPANIC OR LATINO	Stage III
TCGA-DA-A1I0	0	Male	DECEASED	20.37	WHITE	63	NOT HISPANIC OR LATINO	Stage IV
TCGA-DA-A1I1	0	Male	LIVING	222.34	WHITE	55	NOT HISPANIC OR LATINO	Stage III
TCGA-DA-A1I2	0	Male	DECEASED	176.41	WHITE	45	NOT HISPANIC OR LATINO	Stage III
TCGA-DA-A1I4	0	Male	DECEASED	35.91	WHITE	51	NOT HISPANIC OR LATINO	Stage III
TCGA-DA-A1I5	0	Female	LIVING	134.92	WHITE	27	NOT HISPANIC OR LATINO	Stage IV
TCGA-DA-A1I7	0	Male	LIVING	88.8	WHITE	62	NOT HISPANIC OR LATINO	Stage III
TCGA-DA-A1I8	0	Female	DECEASED	53.88	WHITE	63	NOT HISPANIC OR LATINO	Stage II
TCGA-DA-A1IA	0	Female	DECEASED	65.87	WHITE	32	NOT HISPANIC OR LATINO	Stage III
TCGA-DA-A1IB	0	Female	DECEASED	40.57	WHITE	69	NOT HISPANIC OR LATINO	Stage III
TCGA-DA-A1IC	0	Male	DECEASED	68.04	WHITE	81	NOT HISPANIC OR LATINO	Stage III
TCGA-DA-A3F3	0	Male	DECEASED	10.48	WHITE	52	NOT HISPANIC OR LATINO	Stage III
TCGA-DA-A3F5	0	Male	DECEASED	225.79	WHITE	45	NOT HISPANIC OR LATINO	Stage I
TCGA-DA-A3F8	0	Male	LIVING	43.33	WHITE	39	NOT HISPANIC OR LATINO	Stage III
TCGA-DA-A95V	0	Female	LIVING	72.04	WHITE	83	NOT HISPANIC OR LATINO	Stage II
TCGA-DA-A95W	0	Male	LIVING	37.32	WHITE	52	NA	Stage III
TCGA-DA-A95X	0	Male	LIVING	73.88	WHITE	62	NOT HISPANIC OR LATINO	Stage I
TCGA-DA-A95Y	0	Male	DECEASED	14.13	WHITE	68	NOT HISPANIC OR LATINO	Stage II
TCGA-DA-A95Z	0	Male	LIVING	13.01	WHITE	87	NOT HISPANIC OR LATINO	Stage IV
TCGA-DA-A960	1	Male	LIVING	26.41	WHITE	73	NOT HISPANIC OR LATINO	Stage II
TCGA-EB-A1NK	0	Male	LIVING	34.13	WHITE	48	NOT HISPANIC OR LATINO	Stage II
TCGA-EB-A24C	0	Male	LIVING	20.76	WHITE	56	NOT HISPANIC OR LATINO	NA
TCGA-EB-A24D	0	Male	LIVING	21.19	WHITE	72	NOT HISPANIC OR LATINO	Stage III
TCGA-EB-A299	0	Male	LIVING	12.42	WHITE	63	NOT HISPANIC OR LATINO	Stage II
TCGA-EB-A3HV	0	Male	LIVING	1.28	WHITE	37	NOT HISPANIC OR LATINO	Stage II
TCGA-EB-A3XB	0	Male	LIVING	26.15	WHITE	63	NOT HISPANIC OR LATINO	Stage II
TCGA-EB-A3XC	0	Male	LIVING	21.35	WHITE	74	NOT HISPANIC OR LATINO	Stage II
TCGA-EB-A3XD	0	Female	LIVING	38.11	WHITE	53	NOT HISPANIC OR LATINO	Stage II
TCGA-EB-A3XE	0	Female	LIVING	5.91	WHITE	77	NOT HISPANIC OR LATINO	Stage II
TCGA-EB-A3XF	1	Male	LIVING	9.13	WHITE	57	NOT HISPANIC OR LATINO	Stage II
TCGA-EB-A3Y6	0	Female	LIVING	4.14	WHITE	56	NOT HISPANIC OR LATINO	Stage II
TCGA-EB-A3Y7	1	Female	DECEASED	10.71	WHITE	86	NOT HISPANIC OR LATINO	Stage III
TCGA-EB-A41A	1	Male	LIVING	8.61	WHITE	90	NOT HISPANIC OR LATINO	Stage II
TCGA-EB-A41B	0	Female	LIVING	9.56	WHITE	76	NOT HISPANIC OR LATINO	Stage II
TCGA-EB-A42Y	0	Female	DECEASED	23.69	ASIAN	73	NOT HISPANIC OR LATINO	Stage II
TCGA-EB-A42Z	0	Male	LIVING	14.49	ASIAN	49	NOT HISPANIC OR LATINO	Stage III
TCGA-EB-A430	0	Male	LIVING	-0.07	WHITE	83	NOT HISPANIC OR LATINO	Stage II
TCGA-EB-A431	0	Male	LIVING	18.66	WHITE	34	NOT HISPANIC OR LATINO	Stage II
TCGA-EB-A44N	0	Male	DECEASED	6.73	WHITE	59	NOT HISPANIC OR LATINO	Stage II
TCGA-EB-A44O	0	Male	LIVING	2.66	WHITE	69	NOT HISPANIC OR LATINO	Stage II
TCGA-EB-A44P	1	Female	LIVING	24.34	WHITE	58	NOT HISPANIC OR LATINO	Stage II
TCGA-EB-A44Q	0	Female	LIVING	13.86	ASIAN	51	NOT HISPANIC OR LATINO	Stage III
TCGA-EB-A44R	0	Male	DECEASED	10.35	ASIAN	52	NOT HISPANIC OR LATINO	Stage III
TCGA-EB-A4IQ	0	Female	DECEASED	20.89	ASIAN	42	NOT HISPANIC OR LATINO	Stage III
TCGA-EB-A4IS	0	Male	LIVING	25.43	WHITE	77	NOT HISPANIC OR LATINO	Stage II
TCGA-EB-A4OY	0	Female	LIVING	32.1	WHITE	65	NOT HISPANIC OR LATINO	Stage III
TCGA-EB-A4OZ	0	Female	LIVING	20.37	WHITE	41	NOT HISPANIC OR LATINO	Stage III
TCGA-EB-A4P0	0	Male	DECEASED	10.71	WHITE	82	NOT HISPANIC OR LATINO	Stage II
TCGA-EB-A4XL	1	Female	LIVING	25.53	WHITE	56	NOT HISPANIC OR LATINO	Stage II
TCGA-EB-A51B	0	Male	LIVING	30.58	WHITE	53	NOT HISPANIC OR LATINO	Stage II
TCGA-EB-A550	0	Female	DECEASED	8.67	WHITE	75	NOT HISPANIC OR LATINO	Stage II
TCGA-EB-A551	0	Female	LIVING	19.38	WHITE	78	NOT HISPANIC OR LATINO	Stage III
TCGA-EB-A553	1	Male	LIVING	7.42	WHITE	62	NOT HISPANIC OR LATINO	Stage II
TCGA-EB-A57M	1	Male	DECEASED	15.51	ASIAN	56	NOT HISPANIC OR LATINO	Stage III
TCGA-EB-A5FP	0	Female	DECEASED	14.91	WHITE	65	NOT HISPANIC OR LATINO	Stage IV
TCGA-EB-A5KH	0	Male	DECEASED	20.34	ASIAN	55	NOT HISPANIC OR LATINO	Stage III
TCGA-EB-A5SE	0	Male	DECEASED	13.17	WHITE	73	NOT HISPANIC OR LATINO	Stage II
TCGA-EB-A5SF	0	Female	DECEASED	12.12	WHITE	78	NOT HISPANIC OR LATINO	Stage II
TCGA-EB-A5SG	0	Female	LIVING	68.2	WHITE	57	NOT HISPANIC OR LATINO	NA
TCGA-EB-A5SH	0	Female	LIVING	53.98	WHITE	60	NOT HISPANIC OR LATINO	Stage III
TCGA-EB-A5UL	0	Male	LIVING	29.27	WHITE	71	NOT HISPANIC OR LATINO	Stage III
TCGA-EB-A5UM	0	Female	LIVING	25.59	WHITE	48	NOT HISPANIC OR LATINO	Stage II
TCGA-EB-A5UN	0	Male	LIVING	58.87	WHITE	49	NOT HISPANIC OR LATINO	Stage II
TCGA-EB-A5VU	0	Male	DECEASED	10.55	ASIAN	56	NOT HISPANIC OR LATINO	Stage III
TCGA-EB-A6L9	0	Male	LIVING	36.43	ASIAN	55	NOT HISPANIC OR LATINO	Stage III
TCGA-EB-A6QY	0	Male	LIVING	12.55	WHITE	71	NOT HISPANIC OR LATINO	Stage II
TCGA-EB-A6QZ	1	Female	DECEASED	11.56	WHITE	76	NOT HISPANIC OR LATINO	Stage II
TCGA-EB-A6R0	0	Female	DECEASED	19.97	WHITE	58	NOT HISPANIC OR LATINO	Stage II
TCGA-EB-A82B	0	Female	LIVING	12.81	ASIAN	58	NOT HISPANIC OR LATINO	Stage III
TCGA-EB-A82C	0	Female	LIVING	0.56	ASIAN	70	NOT HISPANIC OR LATINO	Stage II
TCGA-EB-A85I	0	Male	LIVING	11.89	WHITE	66	NOT HISPANIC OR LATINO	Stage II
TCGA-EB-A85J	1	Female	LIVING	11.83	WHITE	66	NOT HISPANIC OR LATINO	Stage II
TCGA-EB-A97M	0	Male	LIVING	13.6	WHITE	66	NOT HISPANIC OR LATINO	Stage II
TCGA-EE-A17X	0	Male	DECEASED	29.8	WHITE	54	NA	Stage I
TCGA-EE-A17Y	0	Male	DECEASED	27.2	ASIAN	69	NA	Stage III
TCGA-EE-A17Z	0	Male	DECEASED	8.64	WHITE	57	NOT HISPANIC OR LATINO	Stage II
TCGA-EE-A180	0	Male	DECEASED	94.91	WHITE	69	NOT HISPANIC OR LATINO	Stage III
TCGA-EE-A181	0	Female	DECEASED	33.71	WHITE	82	NOT HISPANIC OR LATINO	Stage II
TCGA-EE-A182	0	Female	DECEASED	14.68	WHITE	84	NOT HISPANIC OR LATINO	Stage III
TCGA-EE-A183	0	Male	DECEASED	26.87	WHITE	48	NOT HISPANIC OR LATINO	Stage 0
TCGA-EE-A184	0	Male	DECEASED	68.1	WHITE	72	NOT HISPANIC OR LATINO	Stage I
TCGA-EE-A185	0	Female	DECEASED	4.96	WHITE	55	NOT HISPANIC OR LATINO	Stage III
TCGA-EE-A20B	0	Female	LIVING	133.71	WHITE	66	NOT HISPANIC OR LATINO	Stage II
TCGA-EE-A20C	0	Male	DECEASED	151.15	WHITE	59	NOT HISPANIC OR LATINO	Stage 0
TCGA-EE-A20F	0	Male	LIVING	91.49	WHITE	53	NOT HISPANIC OR LATINO	Stage I
TCGA-EE-A20H	0	Male	DECEASED	168.13	WHITE	56	NOT HISPANIC OR LATINO	Stage I
TCGA-EE-A20I	0	Male	DECEASED	13.53	WHITE	79	NOT HISPANIC OR LATINO	Stage IV
TCGA-EE-A29A	0	Male	DECEASED	63.3	WHITE	68	NA	Stage III
TCGA-EE-A29B	1	Male	DECEASED	85.02	WHITE	67	NOT HISPANIC OR LATINO	Stage II
TCGA-EE-A29C	0	Male	DECEASED	78.91	WHITE	20	NOT HISPANIC OR LATINO	Stage I
TCGA-EE-A29D	1	Male	DECEASED	13.96	WHITE	87	NOT HISPANIC OR LATINO	Stage III
TCGA-EE-A29E	0	Male	LIVING	63.73	WHITE	54	NOT HISPANIC OR LATINO	Stage III
TCGA-EE-A29G	0	Male	DECEASED	72.01	WHITE	53	NOT HISPANIC OR LATINO	Stage III
TCGA-EE-A29H	0	Female	LIVING	64.59	WHITE	59	NOT HISPANIC OR LATINO	Stage I
TCGA-EE-A29L	0	Male	DECEASED	2.6	WHITE	78	NOT HISPANIC OR LATINO	Stage III
TCGA-EE-A29M	0	Female	LIVING	56.8	WHITE	33	NOT HISPANIC OR LATINO	Stage I
TCGA-EE-A29N	0	Male	DECEASED	18.59	WHITE	78	NOT HISPANIC OR LATINO	I/II NOS
TCGA-EE-A29P	0	Female	LIVING	56.37	WHITE	73	NOT HISPANIC OR LATINO	Stage II
TCGA-EE-A29Q	0	Female	DECEASED	66.69	WHITE	70	NOT HISPANIC OR LATINO	Stage II
TCGA-EE-A29R	1	Female	LIVING	14.45	WHITE	48	NOT HISPANIC OR LATINO	Stage III
TCGA-EE-A29S	0	Male	DECEASED	61.24	WHITE	79	NOT HISPANIC OR LATINO	Stage II
TCGA-EE-A29T	0	Female	LIVING	369.65	WHITE	51	NOT HISPANIC OR LATINO	NA
TCGA-EE-A29V	0	Male	DECEASED	25.85	WHITE	85	NOT HISPANIC OR LATINO	Stage III
TCGA-EE-A29W	0	Male	LIVING	194.88	WHITE	42	NOT HISPANIC OR LATINO	Stage 0
TCGA-EE-A29X	0	Female	DECEASED	17.9	WHITE	58	NOT HISPANIC OR LATINO	Stage I
TCGA-EE-A2A0	1	Female	DECEASED	46.78	WHITE	77	NOT HISPANIC OR LATINO	Stage II
TCGA-EE-A2A1	0	Male	LIVING	115.87	WHITE	46	NOT HISPANIC OR LATINO	Stage I
TCGA-EE-A2A2	1	Male	LIVING	59.59	WHITE	71	NOT HISPANIC OR LATINO	Stage III
TCGA-EE-A2A5	0	Male	DECEASED	39.26	WHITE	43	NOT HISPANIC OR LATINO	Stage I
TCGA-EE-A2A6	0	Male	LIVING	86.07	WHITE	43	NOT HISPANIC OR LATINO	Stage I
TCGA-EE-A2GB	0	Male	LIVING	59.23	WHITE	51	NOT HISPANIC OR LATINO	Stage III
TCGA-EE-A2GC	0	Male	LIVING	67.38	WHITE	82	NOT HISPANIC OR LATINO	Stage II
TCGA-EE-A2GD	1	Female	DECEASED	339.88	WHITE	58	NOT HISPANIC OR LATINO	Stage II
TCGA-EE-A2GE	0	Male	LIVING	173.65	WHITE	44	NOT HISPANIC OR LATINO	Stage I
TCGA-EE-A2GH	0	Male	LIVING	220.07	WHITE	34	NOT HISPANIC OR LATINO	Stage I
TCGA-EE-A2GI	0	Male	LIVING	48.69	WHITE	39	NOT HISPANIC OR LATINO	Stage I
TCGA-EE-A2GJ	0	Male	DECEASED	107.29	WHITE	83	NOT HISPANIC OR LATINO	Stage I
TCGA-EE-A2GK	0	Female	LIVING	54.7	WHITE	46	NOT HISPANIC OR LATINO	Stage I
TCGA-EE-A2GL	0	Female	LIVING	79.6	WHITE	40	NOT HISPANIC OR LATINO	Stage II
TCGA-EE-A2GM	0	Female	LIVING	75.43	WHITE	70	NOT HISPANIC OR LATINO	Stage II
TCGA-EE-A2GN	1	Male	DECEASED	102.04	WHITE	67	NOT HISPANIC OR LATINO	Stage II
TCGA-EE-A2GO	0	Female	LIVING	126.71	WHITE	66	NOT HISPANIC OR LATINO	Stage II
TCGA-EE-A2GP	1	Male	DECEASED	13.9	WHITE	80	NOT HISPANIC OR LATINO	Stage III
TCGA-EE-A2GR	1	Male	DECEASED	42.74	WHITE	78	NOT HISPANIC OR LATINO	Stage II
TCGA-EE-A2GS	0	Female	DECEASED	81.14	WHITE	28	NOT HISPANIC OR LATINO	Stage I
TCGA-EE-A2GT	0	Male	LIVING	44.84	WHITE	77	NOT HISPANIC OR LATINO	Stage II
TCGA-EE-A2GU	0	Female	LIVING	94.74	WHITE	65	NOT HISPANIC OR LATINO	Stage I
TCGA-EE-A2M5	0	Male	DECEASED	21.65	WHITE	49	NOT HISPANIC OR LATINO	Stage I
TCGA-EE-A2M6	1	Male	LIVING	129.17	WHITE	61	NOT HISPANIC OR LATINO	Stage I
TCGA-EE-A2M7	0	Male	DECEASED	28.81	WHITE	66	NOT HISPANIC OR LATINO	Stage II
TCGA-EE-A2M8	0	Female	DECEASED	19.74	WHITE	54	NOT HISPANIC OR LATINO	Stage III
TCGA-EE-A2MC	0	Male	DECEASED	61.47	WHITE	73	NOT HISPANIC OR LATINO	Stage I
TCGA-EE-A2MD	1	Male	DECEASED	47.24	WHITE	52	NOT HISPANIC OR LATINO	Stage II
TCGA-EE-A2ME	0	Male	DECEASED	103.19	WHITE	51	NOT HISPANIC OR LATINO	Stage I
TCGA-EE-A2MF	0	Female	DECEASED	268.53	WHITE	39	NOT HISPANIC OR LATINO	Stage I
TCGA-EE-A2MG	0	Male	DECEASED	103.12	WHITE	23	NOT HISPANIC OR LATINO	Stage I
TCGA-EE-A2MH	0	Male	DECEASED	16.95	WHITE	66	NOT HISPANIC OR LATINO	Stage III
TCGA-EE-A2MI	1	Male	DECEASED	204.5	WHITE	43	NOT HISPANIC OR LATINO	Stage II
TCGA-EE-A2MJ	0	Male	DECEASED	96.16	WHITE	60	NOT HISPANIC OR LATINO	Stage III
TCGA-EE-A2MK	0	Female	LIVING	180.26	WHITE	18	NOT HISPANIC OR LATINO	Stage III
TCGA-EE-A2ML	0	Male	DECEASED	216.49	WHITE	35	NOT HISPANIC OR LATINO	Stage II
TCGA-EE-A2MM	0	Female	DECEASED	167.77	WHITE	63	NOT HISPANIC OR LATINO	Stage I
TCGA-EE-A2MN	0	Male	DECEASED	47.5	WHITE	58	NOT HISPANIC OR LATINO	Stage I
TCGA-EE-A2MP	0	Female	LIVING	248.46	WHITE	34	NOT HISPANIC OR LATINO	Stage I
TCGA-EE-A2MQ	0	Female	DECEASED	43.2	WHITE	70	NOT HISPANIC OR LATINO	Stage III
TCGA-EE-A2MR	0	Male	LIVING	134.3	WHITE	61	NOT HISPANIC OR LATINO	Stage I
TCGA-EE-A2MS	0	Male	LIVING	162.35	WHITE	72	NOT HISPANIC OR LATINO	Stage II
TCGA-EE-A2MT	0	Male	LIVING	71.16	WHITE	45	NOT HISPANIC OR LATINO	Stage I
TCGA-EE-A2MU	0	Male	LIVING	53.22	WHITE	71	NOT HISPANIC OR LATINO	Stage I
TCGA-EE-A3AA	0	Male	LIVING	124.21	WHITE	47	NOT HISPANIC OR LATINO	Stage III
TCGA-EE-A3AB	0	Male	LIVING	122.63	WHITE	30	NOT HISPANIC OR LATINO	Stage III
TCGA-EE-A3AC	0	Male	LIVING	63.99	WHITE	47	NOT HISPANIC OR LATINO	Stage III
TCGA-EE-A3AD	0	Male	DECEASED	28.75	WHITE	50	NOT HISPANIC OR LATINO	Stage III
TCGA-EE-A3AE	1	Female	LIVING	54.47	WHITE	52	NOT HISPANIC OR LATINO	Stage I
TCGA-EE-A3AF	0	Female	DECEASED	13.8	WHITE	48	NOT HISPANIC OR LATINO	Stage III
TCGA-EE-A3AG	1	Male	DECEASED	41.56	WHITE	25	NOT HISPANIC OR LATINO	Stage III
TCGA-EE-A3AH	0	Male	DECEASED	138.7	WHITE	30	NOT HISPANIC OR LATINO	Stage II
TCGA-EE-A3J3	0	Male	DECEASED	172.04	WHITE	42	NOT HISPANIC OR LATINO	Stage I
TCGA-EE-A3J4	0	Male	DECEASED	127.1	WHITE	72	NOT HISPANIC OR LATINO	Stage II
TCGA-EE-A3J5	0	Male	DECEASED	36.93	WHITE	71	NOT HISPANIC OR LATINO	Stage III
TCGA-EE-A3J7	0	Male	LIVING	64.03	WHITE	43	NOT HISPANIC OR LATINO	Stage I
TCGA-EE-A3J8	0	Male	DECEASED	34.3	WHITE	59	NOT HISPANIC OR LATINO	Stage III
TCGA-EE-A3JA	0	Male	DECEASED	53.15	WHITE	44	NOT HISPANIC OR LATINO	Stage I
TCGA-EE-A3JB	0	Female	LIVING	201.64	WHITE	60	NOT HISPANIC OR LATINO	Stage III
TCGA-EE-A3JD	1	Male	DECEASED	27.33	WHITE	70	NOT HISPANIC OR LATINO	Stage III
TCGA-EE-A3JE	0	Male	LIVING	51.31	WHITE	75	NOT HISPANIC OR LATINO	Stage III
TCGA-EE-A3JH	0	Male	LIVING	134.23	WHITE	54	NOT HISPANIC OR LATINO	Stage I
TCGA-EE-A3JI	1	Male	DECEASED	152.69	WHITE	48	NOT HISPANIC OR LATINO	Stage I
TCGA-ER-A193	0	Male	DECEASED	31.37	WHITE	62	NOT HISPANIC OR LATINO	Stage II
TCGA-ER-A194	0	Male	DECEASED	44.48	WHITE	77	NOT HISPANIC OR LATINO	NA
TCGA-ER-A195	0	Male	DECEASED	35.41	WHITE	46	NOT HISPANIC OR LATINO	NA
TCGA-ER-A196	0	Female	LIVING	58.64	WHITE	64	NOT HISPANIC OR LATINO	Stage II
TCGA-ER-A197	0	Female	DECEASED	13.93	WHITE	83	NOT HISPANIC OR LATINO	Stage III
TCGA-ER-A198	1	Male	DECEASED	50.72	WHITE	45	NOT HISPANIC OR LATINO	NA
TCGA-ER-A199	0	Female	DECEASED	9.17	WHITE	86	NOT HISPANIC OR LATINO	Stage III
TCGA-ER-A19A	0	Male	LIVING	77.69	WHITE	79	NOT HISPANIC OR LATINO	Stage IV
TCGA-ER-A19B	0	Male	DECEASED	98.32	WHITE	42	NOT HISPANIC OR LATINO	NA
TCGA-ER-A19C	0	Male	DECEASED	48.85	WHITE	77	NOT HISPANIC OR LATINO	Stage I
TCGA-ER-A19D	0	Female	DECEASED	12.58	WHITE	46	NOT HISPANIC OR LATINO	Stage I
TCGA-ER-A19E	0	Female	DECEASED	13.01	WHITE	36	NOT HISPANIC OR LATINO	Stage I
TCGA-ER-A19F	0	Male	DECEASED	26.35	WHITE	82	NOT HISPANIC OR LATINO	NA
TCGA-ER-A19G	1	Female	LIVING	301.84	WHITE	48	NOT HISPANIC OR LATINO	NA
TCGA-ER-A19H	0	Male	DECEASED	152.23	WHITE	40	NOT HISPANIC OR LATINO	NA
TCGA-ER-A19J	0	Male	DECEASED	6.44	WHITE	54	NOT HISPANIC OR LATINO	Stage IV
TCGA-ER-A19K	0	Female	DECEASED	15.41	WHITE	79	NOT HISPANIC OR LATINO	Stage II
TCGA-ER-A19L	0	Male	DECEASED	131.41	WHITE	35	NOT HISPANIC OR LATINO	NA
TCGA-ER-A19M	0	Male	DECEASED	61.01	WHITE	36	NOT HISPANIC OR LATINO	Stage I
TCGA-ER-A19N	0	Male	DECEASED	44.05	WHITE	47	NOT HISPANIC OR LATINO	NA
TCGA-ER-A19O	0	Male	DECEASED	NA	WHITE	56	NOT HISPANIC OR LATINO	Stage III
TCGA-ER-A19P	0	Female	DECEASED	161.96	WHITE	47	NOT HISPANIC OR LATINO	NA
TCGA-ER-A19Q	0	Female	DECEASED	50.85	WHITE	37	NOT HISPANIC OR LATINO	NA
TCGA-ER-A19S	0	Female	LIVING	49.44	WHITE	81	NOT HISPANIC OR LATINO	NA
TCGA-ER-A19T	0	Male	DECEASED	8.87	WHITE	51	NOT HISPANIC OR LATINO	Stage IV
TCGA-ER-A19W	0	Female	DECEASED	148.06	WHITE	48	NOT HISPANIC OR LATINO	NA
TCGA-ER-A1A1	0	Male	LIVING	104.99	WHITE	58	NOT HISPANIC OR LATINO	Stage III
TCGA-ER-A2NB	0	Male	DECEASED	28.15	WHITE	57	NOT HISPANIC OR LATINO	Stage III
TCGA-ER-A2NC	0	Male	DECEASED	43.79	WHITE	50	NOT HISPANIC OR LATINO	Stage I
TCGA-ER-A2ND	0	Female	DECEASED	23.32	WHITE	57	NOT HISPANIC OR LATINO	Stage III
TCGA-ER-A2NE	1	Male	DECEASED	20.14	WHITE	39	NOT HISPANIC OR LATINO	Stage 0
TCGA-ER-A2NF	0	Male	DECEASED	28.81	WHITE	53	NOT HISPANIC OR LATINO	Stage III
TCGA-ER-A2NG	0	Female	DECEASED	48.95	WHITE	43	NOT HISPANIC OR LATINO	Stage III
TCGA-ER-A2NH	0	Male	LIVING	41.52	WHITE	49	NOT HISPANIC OR LATINO	Stage III
TCGA-ER-A3ES	0	Male	DECEASED	246.85	WHITE	25	NOT HISPANIC OR LATINO	NA
TCGA-ER-A3ET	0	Female	DECEASED	92.94	WHITE	64	NOT HISPANIC OR LATINO	Stage III
TCGA-ER-A3EV	0	Male	DECEASED	46.94	WHITE	55	NOT HISPANIC OR LATINO	Stage III
TCGA-ER-A3PL	0	Male	LIVING	33.18	WHITE	30	NOT HISPANIC OR LATINO	Stage IV
TCGA-ER-A42H	0	Male	DECEASED	13.99	WHITE	76	NOT HISPANIC OR LATINO	NA
TCGA-ER-A42K	0	Female	DECEASED	12.94	WHITE	40	NOT HISPANIC OR LATINO	Stage III
TCGA-ER-A42L	0	Male	LIVING	148.92	WHITE	49	NOT HISPANIC OR LATINO	Stage II
TCGA-FR-A2OS	0	Female	DECEASED	12.09	WHITE	49	NA	Stage II
TCGA-FR-A3R1	0	Male	LIVING	22.5	WHITE	69	NOT HISPANIC OR LATINO	Stage II
TCGA-FR-A3YN	0	Male	LIVING	92.9	WHITE	44	NOT HISPANIC OR LATINO	Stage I
TCGA-FR-A3YO	0	Female	LIVING	NA	WHITE	NA	NOT HISPANIC OR LATINO	I/II NOS
TCGA-FR-A44A	0	Female	LIVING	174.08	WHITE	29	NOT HISPANIC OR LATINO	Stage II
TCGA-FR-A69P	0	Female	LIVING	15.7	WHITE	34	NOT HISPANIC OR LATINO	Stage III
TCGA-FR-A726	1	Male	DECEASED	10.02	WHITE	90	NOT HISPANIC OR LATINO	Stage II
TCGA-FR-A728	0	Female	LIVING	19.15	WHITE	54	NOT HISPANIC OR LATINO	Stage III
TCGA-FR-A729	0	Female	LIVING	220.63	WHITE	38	NOT HISPANIC OR LATINO	Stage I
TCGA-FR-A7U8	0	Male	LIVING	27.83	WHITE	50	NOT HISPANIC OR LATINO	Stage III
TCGA-FR-A7U9	1	Female	LIVING	18.76	WHITE	63	NOT HISPANIC OR LATINO	Stage III
TCGA-FR-A7UA	0	Female	LIVING	38.24	WHITE	65	NOT HISPANIC OR LATINO	Stage I
TCGA-FR-A8YC	0	Male	DECEASED	34.79	WHITE	78	NOT HISPANIC OR LATINO	Stage II
TCGA-FR-A8YD	0	Female	DECEASED	36.24	WHITE	56	NOT HISPANIC OR LATINO	Stage II
TCGA-FR-A8YE	0	Male	LIVING	104.34	WHITE	41	NOT HISPANIC OR LATINO	Stage I
TCGA-FS-A1YW	1	Male	DECEASED	216.75	WHITE	52	NOT HISPANIC OR LATINO	Stage I
TCGA-FS-A1YX	0	Female	DECEASED	48.55	WHITE	39	NOT HISPANIC OR LATINO	Stage I
TCGA-FS-A1YY	0	Female	DECEASED	228.42	WHITE	55	NOT HISPANIC OR LATINO	Stage II
TCGA-FS-A1Z0	0	Female	DECEASED	202.5	WHITE	32	NOT HISPANIC OR LATINO	Stage I
TCGA-FS-A1Z3	0	Female	DECEASED	20.89	WHITE	72	NOT HISPANIC OR LATINO	Stage IV
TCGA-FS-A1Z4	0	Male	DECEASED	28.06	WHITE	62	NOT HISPANIC OR LATINO	Stage I
TCGA-FS-A1Z7	0	Male	DECEASED	7.79	WHITE	19	NOT HISPANIC OR LATINO	Stage III
TCGA-FS-A1ZA	0	Female	DECEASED	27.69	WHITE	45	NOT HISPANIC OR LATINO	Stage III
TCGA-FS-A1ZB	0	Male	DECEASED	48.82	WHITE	57	NOT HISPANIC OR LATINO	Stage II
TCGA-FS-A1ZC	0	Male	DECEASED	357.1	WHITE	51	NOT HISPANIC OR LATINO	I/II NOS
TCGA-FS-A1ZD	0	Male	DECEASED	53.48	WHITE	63	NOT HISPANIC OR LATINO	Stage II
TCGA-FS-A1ZE	0	Male	DECEASED	46.42	WHITE	40	NOT HISPANIC OR LATINO	Stage II
TCGA-FS-A1ZF	0	Female	DECEASED	15.44	WHITE	78	NOT HISPANIC OR LATINO	Stage II
TCGA-FS-A1ZG	0	Female	DECEASED	9.69	WHITE	60	NOT HISPANIC OR LATINO	Stage III
TCGA-FS-A1ZH	0	Female	DECEASED	32.72	WHITE	71	NOT HISPANIC OR LATINO	Stage IV
TCGA-FS-A1ZJ	0	Female	DECEASED	47.34	WHITE	75	NOT HISPANIC OR LATINO	Stage I
TCGA-FS-A1ZK	0	Male	DECEASED	23.92	WHITE	68	NOT HISPANIC OR LATINO	Stage II
TCGA-FS-A1ZM	0	Male	LIVING	101.18	WHITE	74	NOT HISPANIC OR LATINO	Stage III
TCGA-FS-A1ZN	0	Male	DECEASED	23.98	WHITE	43	NOT HISPANIC OR LATINO	Stage III
TCGA-FS-A1ZP	0	Male	DECEASED	74.67	WHITE	52	NOT HISPANIC OR LATINO	Stage II
TCGA-FS-A1ZQ	0	Male	DECEASED	133.44	WHITE	31	NOT HISPANIC OR LATINO	I/II NOS
TCGA-FS-A1ZR	0	Male	DECEASED	11.4	WHITE	36	NOT HISPANIC OR LATINO	Stage II
TCGA-FS-A1ZS	0	Male	LIVING	148.69	WHITE	54	NOT HISPANIC OR LATINO	Stage I
TCGA-FS-A1ZT	0	Male	LIVING	53.12	WHITE	55	NOT HISPANIC OR LATINO	Stage III
TCGA-FS-A1ZU	0	Female	DECEASED	26.54	WHITE	70	NOT HISPANIC OR LATINO	Stage II
TCGA-FS-A1ZW	0	Male	LIVING	49.44	WHITE	65	NOT HISPANIC OR LATINO	Stage III
TCGA-FS-A1ZY	0	Male	DECEASED	27.07	WHITE	71	NOT HISPANIC OR LATINO	Stage II
TCGA-FS-A1ZZ	1	Female	DECEASED	27	WHITE	54	HISPANIC OR LATINO	Stage II
TCGA-FS-A4F0	0	Female	LIVING	77.76	WHITE	67	NOT HISPANIC OR LATINO	Stage II
TCGA-FS-A4F4	0	Male	DECEASED	66.62	WHITE	64	NA	Stage II
TCGA-FS-A4F5	0	Female	DECEASED	28.71	WHITE	77	NOT HISPANIC OR LATINO	Stage I
TCGA-FS-A4F8	0	Male	DECEASED	174.7	WHITE	52	NOT HISPANIC OR LATINO	Stage I
TCGA-FS-A4F9	0	Male	LIVING	34	WHITE	80	NOT HISPANIC OR LATINO	Stage III
TCGA-FS-A4FB	0	Female	DECEASED	26.71	WHITE	46	NOT HISPANIC OR LATINO	Stage III
TCGA-FS-A4FC	0	Female	DECEASED	54.37	WHITE	75	NOT HISPANIC OR LATINO	Stage II
TCGA-FS-A4FD	1	Male	DECEASED	80.62	WHITE	39	NOT HISPANIC OR LATINO	Stage III
TCGA-FW-A3I3	0	Female	LIVING	17.44	WHITE	59	NOT HISPANIC OR LATINO	Stage IV
TCGA-FW-A3R5	1	Male	LIVING	36.93	WHITE	68	NOT HISPANIC OR LATINO	Stage III
TCGA-FW-A3TU	0	Female	DECEASED	55.55	WHITE	72	NOT HISPANIC OR LATINO	NA
TCGA-FW-A3TV	0	Female	LIVING	13.5	WHITE	57	NOT HISPANIC OR LATINO	Stage III
TCGA-FW-A5DX	1	Male	LIVING	21.02	WHITE	71	NOT HISPANIC OR LATINO	Stage III
TCGA-FW-A5DY	0	Female	LIVING	19.28	WHITE	48	NOT HISPANIC OR LATINO	Stage III
TCGA-GF-A2C7	0	Male	LIVING	0.69	WHITE	48	NOT HISPANIC OR LATINO	Stage II
TCGA-GF-A3OT	0	Female	LIVING	9.89	WHITE	58	NOT HISPANIC OR LATINO	Stage III
TCGA-GF-A4EO	0	Female	LIVING	19.42	WHITE	74	NOT HISPANIC OR LATINO	Stage III
TCGA-GF-A6C8	0	Female	LIVING	2.04	WHITE	62	NOT HISPANIC OR LATINO	Stage II
TCGA-GF-A6C9	1	Male	LIVING	15.77	WHITE	78	NOT HISPANIC OR LATINO	Stage III
TCGA-GF-A769	0	Male	DECEASED	35.15	WHITE	39	NOT HISPANIC OR LATINO	Stage II
TCGA-GN-A262	0	Female	LIVING	139.78	WHITE	47	NOT HISPANIC OR LATINO	NA
TCGA-GN-A263	0	Male	DECEASED	15.34	WHITE	24	NOT HISPANIC OR LATINO	Stage IV
TCGA-GN-A264	0	Male	DECEASED	117.84	WHITE	60	NOT HISPANIC OR LATINO	NA
TCGA-GN-A265	0	Male	LIVING	96.85	WHITE	53	NOT HISPANIC OR LATINO	NA
TCGA-GN-A266	0	Male	DECEASED	10.12	WHITE	45	NOT HISPANIC OR LATINO	NA
TCGA-GN-A267	0	Male	DECEASED	64.39	WHITE	38	NOT HISPANIC OR LATINO	Stage III
TCGA-GN-A268	0	Female	DECEASED	62.75	WHITE	83	NOT HISPANIC OR LATINO	Stage II
TCGA-GN-A269	1	Male	DECEASED	5.58	WHITE	70	NOT HISPANIC OR LATINO	Stage III
TCGA-GN-A26A	0	Female	DECEASED	32.46	WHITE	63	NOT HISPANIC OR LATINO	Stage III
TCGA-GN-A26C	0	Male	DECEASED	26.97	WHITE	77	NOT HISPANIC OR LATINO	Stage III
TCGA-GN-A26D	0	Female	DECEASED	47.96	WHITE	72	NOT HISPANIC OR LATINO	Stage II
TCGA-GN-A4U3	1	Male	LIVING	121.81	WHITE	30	NOT HISPANIC OR LATINO	Stage III
TCGA-GN-A4U4	0	Male	LIVING	39.32	WHITE	73	NOT HISPANIC OR LATINO	Stage II
TCGA-GN-A4U5	0	Female	LIVING	37.98	WHITE	61	NOT HISPANIC OR LATINO	Stage I
TCGA-GN-A4U7	0	Female	DECEASED	10.41	WHITE	56	NOT HISPANIC OR LATINO	Stage III
TCGA-GN-A4U8	0	Male	LIVING	48.85	WHITE	51	NOT HISPANIC OR LATINO	NA
TCGA-GN-A4U9	0	Male	DECEASED	22.11	WHITE	71	NOT HISPANIC OR LATINO	Stage III
TCGA-GN-A8LK	0	Male	DECEASED	50.07	WHITE	70	NOT HISPANIC OR LATINO	Stage I
TCGA-GN-A8LL	0	Female	DECEASED	21.35	WHITE	68	NOT HISPANIC OR LATINO	Stage II
TCGA-GN-A8LN	0	Male	LIVING	25.36	WHITE	68	NOT HISPANIC OR LATINO	Stage II
TCGA-GN-A9SD	0	Female	DECEASED	59.36	WHITE	59	NOT HISPANIC OR LATINO	Stage I
TCGA-HR-A2OG	0	Female	LIVING	0.23	NA	50	NA	NA
TCGA-HR-A2OH	0	Female	DECEASED	65.83	NA	46	NA	Stage III
TCGA-HR-A5NC	0	Female	LIVING	32.85	NA	90	NA	NA
TCGA-IH-A3EA	0	Male	LIVING	17.21	WHITE	61	HISPANIC OR LATINO	Stage II
TCGA-LH-A9QB	0	Female	LIVING	368.5	WHITE	24	NOT HISPANIC OR LATINO	NA
TCGA-OD-A75X	1	Male	DECEASED	297.67	WHITE	49	NOT HISPANIC OR LATINO	NA
TCGA-QB-A6FS	0	Male	LIVING	7.23	WHITE	49	NOT HISPANIC OR LATINO	Stage III
TCGA-QB-AA9O	0	Male	DECEASED	18.04	WHITE	73	NOT HISPANIC OR LATINO	Stage III
TCGA-RP-A690	0	Female	LIVING	0.2	WHITE	66	NOT HISPANIC OR LATINO	NA
TCGA-RP-A693	1	Male	LIVING	0.33	WHITE	77	NOT HISPANIC OR LATINO	Stage IV
TCGA-RP-A694	0	Male	LIVING	0.69	WHITE	71	NOT HISPANIC OR LATINO	Stage IV
TCGA-RP-A695	0	Male	LIVING	NA	WHITE	NA	NOT HISPANIC OR LATINO	Stage IV
TCGA-RP-A6K9	0	Female	LIVING	NA	WHITE	NA	NOT HISPANIC OR LATINO	NA
TCGA-W3-A824	0	Male	LIVING	227.99	WHITE	63	NOT HISPANIC OR LATINO	Stage I
TCGA-W3-A825	0	Female	DECEASED	62.98	WHITE	60	NOT HISPANIC OR LATINO	Stage II
TCGA-W3-A828	0	Male	DECEASED	120.99	WHITE	66	NOT HISPANIC OR LATINO	Stage II
TCGA-W3-AA1O	0	Male	DECEASED	4.01	WHITE	85	NOT HISPANIC OR LATINO	Stage III
TCGA-W3-AA1Q	0	Male	DECEASED	69.02	WHITE	57	NOT HISPANIC OR LATINO	Stage III
TCGA-W3-AA1R	0	Male	DECEASED	111.01	WHITE	71	NOT HISPANIC OR LATINO	Stage II
TCGA-W3-AA1V	1	Male	DECEASED	42.05	WHITE	63	NOT HISPANIC OR LATINO	Stage II
TCGA-W3-AA1W	0	Male	LIVING	218.99	WHITE	64	NOT HISPANIC OR LATINO	Stage II
TCGA-W3-AA21	0	Male	DECEASED	104.96	WHITE	26	NOT HISPANIC OR LATINO	Stage I
TCGA-WE-A8JZ	0	Male	LIVING	24.01	NA	70	NA	Stage III
TCGA-WE-A8K1	1	Male	LIVING	49.01	WHITE	74	NOT HISPANIC OR LATINO	Stage III
TCGA-WE-A8K4	0	Male	LIVING	20.17	WHITE	85	NOT HISPANIC OR LATINO	Stage II
TCGA-WE-A8K5	1	Male	DECEASED	61.1	WHITE	65	NOT HISPANIC OR LATINO	Stage IV
TCGA-WE-A8K6	0	Male	LIVING	17.94	WHITE	79	NOT HISPANIC OR LATINO	Stage III
TCGA-WE-A8ZM	0	Male	LIVING	101.25	WHITE	70	NOT HISPANIC OR LATINO	Stage III
TCGA-WE-A8ZN	0	Male	LIVING	58.94	NA	57	NOT HISPANIC OR LATINO	Stage II
TCGA-WE-A8ZO	0	Female	LIVING	70.47	NA	73	NOT HISPANIC OR LATINO	Stage III
TCGA-WE-A8ZQ	0	Male	LIVING	63.17	NA	48	NOT HISPANIC OR LATINO	Stage II
TCGA-WE-A8ZR	0	Male	DECEASED	9	WHITE	49	NOT HISPANIC OR LATINO	Stage III
TCGA-WE-A8ZT	0	Female	LIVING	11.79	WHITE	25	NOT HISPANIC OR LATINO	Stage IV
TCGA-WE-A8ZX	0	Male	LIVING	35.78	WHITE	45	NOT HISPANIC OR LATINO	Stage III
TCGA-WE-A8ZY	0	Male	DECEASED	49.47	WHITE	62	NOT HISPANIC OR LATINO	Stage II
TCGA-WE-AA9Y	0	Male	LIVING	12.16	WHITE	37	NOT HISPANIC OR LATINO	Stage III
TCGA-WE-AAA0	0	Male	LIVING	40.37	WHITE	47	NOT HISPANIC OR LATINO	Stage I
TCGA-WE-AAA3	0	Female	LIVING	21.39	WHITE	84	NOT HISPANIC OR LATINO	Stage III
TCGA-WE-AAA4	0	Female	LIVING	24.97	WHITE	56	NOT HISPANIC OR LATINO	Stage III
TCGA-XV-A9VZ	0	Female	LIVING	0.36	WHITE	90	NOT HISPANIC OR LATINO	Stage II
TCGA-XV-A9W2	0	Male	LIVING	13.7	WHITE	81	NOT HISPANIC OR LATINO	Stage I
TCGA-XV-A9W5	0	Male	LIVING	12.88	WHITE	51	NOT HISPANIC OR LATINO	I/II NOS
TCGA-XV-AAZV	0	Female	LIVING	13.53	WHITE	56	NOT HISPANIC OR LATINO	Stage II
TCGA-XV-AAZW	0	Female	DECEASED	12.91	WHITE	62	NOT HISPANIC OR LATINO	Stage II
TCGA-XV-AAZY	0	Female	LIVING	13.3	WHITE	76	NOT HISPANIC OR LATINO	Stage III
TCGA-XV-AB01	0	Female	LIVING	13.24	WHITE	54	NOT HISPANIC OR LATINO	Stage II
TCGA-YD-A89C	1	Female	LIVING	6.9	WHITE	43	NOT HISPANIC OR LATINO	Stage I
TCGA-YD-A9TA	0	Male	LIVING	49.15	WHITE	75	NOT HISPANIC OR LATINO	NA
TCGA-YD-A9TB	0	Female	LIVING	NA	WHITE	NA	NOT HISPANIC OR LATINO	NA
TCGA-YG-AA3N	0	Male	LIVING	10.05	NA	67	HISPANIC OR LATINO	Stage II
TCGA-YG-AA3O	0	Male	DECEASED	37.91	NA	62	HISPANIC OR LATINO	NA
TCGA-YG-AA3P	0	Female	LIVING	14.42	NA	63	HISPANIC OR LATINO	Stage II
TCGA-Z2-A8RT	0	Female	LIVING	27.56	WHITE	42	NOT HISPANIC OR LATINO	Stage II
TCGA-Z2-AA3S	0	Male	LIVING	96.91	WHITE	58	NOT HISPANIC OR LATINO	Stage I
TCGA-Z2-AA3V	0	Female	LIVING	15.97	WHITE	57	NOT HISPANIC OR LATINO	Stage I

## Sheet: S3
TableS3:FSIP2 relavant GO, KEGG and GSEA analysis (GDSC-SKCM)
	.id	X	ID	Description	setSize	enrichmentScore	NES	pvalue	p.adjust	qvalues	rank	leading_edge	core_enrichment
1	group_GSEA_Go_BP.csv	GO:0000727	GO:0000727	double-strand break repair via break-induced replication	11	0.755395	2.09025	0.00877193	0.123623	0.108445	3457	tags=73%, list=18%, signal=59%	4171/4174/51659/8318/4176/8317/4172/84296
2	group_GSEA_Go_BP.csv	GO:0051673	GO:0051673	membrane disruption in other organism	11	0.737209	2.03993	0.00877193	0.123623	0.108445	592	tags=18%, list=3%, signal=18%	4057/1670
3	group_GSEA_Go_BP.csv	GO:0000028	GO:0000028	ribosomal small subunit assembly	16	0.732642	2.25821	0.016129	0.169929	0.149065	3885	tags=88%, list=21%, signal=69%	51081/6169/5822/6204/3921/29777/26284/6208/27341/64963/6209/6193/51065/6223
4	group_GSEA_Go_BP.csv	GO:0006271	GO:0006271	DNA strand elongation involved in DNA replication	20	0.730675	2.49779	0.0188679	0.180734	0.158544	4243	tags=85%, list=23%, signal=66%	2237/51659/64785/1763/5983/10714/4176/3978/5111/5425/5426/5984/4172/84296/10535/3980/9837
5	group_GSEA_Go_BP.csv	GO:0000076	GO:0000076	DNA replication checkpoint	16	0.707066	2.17938	0.016129	0.169929	0.149065	3159	tags=56%, list=17%, signal=47%	135458/1763/8318/990/5883/8914/54962/4998/90381
6	group_GSEA_Go_BP.csv	GO:0006122	GO:0006122	mitochondrial electron transport, ubiquinol to cytochrome c	12	0.701636	1.93056	0.0217391	0.195232	0.171262	4872	tags=75%, list=26%, signal=56%	790955/7384/29796/27089/4204/7388/54205/7386/10975
7	group_GSEA_Go_BP.csv	GO:0070987	GO:0070987	error-free translesion synthesis	20	0.68485	2.34113	0.0188679	0.180734	0.158544	2984	tags=65%, list=16%, signal=55%	5983/6117/6118/5111/25898/7316/7415/7353/55666/7314/5984/5982/6119
8	group_GSEA_Go_BP.csv	GO:1903405	GO:1903405	protein localization to nuclear body	10	0.680418	1.82847	0.0175439	0.175973	0.154367	5652	tags=90%, list=30%, signal=63%	55135/10574/6950/22948/1736/10576/10575/7203/908
9	group_GSEA_Go_BP.csv	GO:1904851	GO:1904851	positive regulation of establishment of protein localization to telomere	10	0.680418	1.82847	0.0175439	0.175973	0.154367	5652	tags=90%, list=30%, signal=63%	55135/10574/6950/22948/1736/10576/10575/7203/908
10	group_GSEA_Go_BP.csv	GO:1904867	GO:1904867	protein localization to Cajal body	10	0.680418	1.82847	0.0175439	0.175973	0.154367	5652	tags=90%, list=30%, signal=63%	55135/10574/6950/22948/1736/10576/10575/7203/908
11	group_GSEA_Go_BP.csv	GO:0036444	GO:0036444	calcium import into the mitochondrion	11	0.676074	1.87076	0.0263158	0.216015	0.189492	3803	tags=64%, list=20%, signal=51%	10367/55013/5664/63933/79085/10939/90550
12	group_GSEA_Go_BP.csv	GO:0097428	GO:0097428	protein maturation by iron-sulfur cluster transfer	11	0.671235	1.85737	0.0263158	0.216015	0.189492	4396	tags=64%, list=23%, signal=49%	654483/284106/64110/64210/150274/10539/122961
13	group_GSEA_Go_BP.csv	GO:0090151	GO:0090151	establishment of protein localization to mitochondrial membrane	14	0.657835	1.88987	0.0422535	0.273665	0.240064	3100	tags=43%, list=17%, signal=36%	26519/29928/808/26517/56993/9141
14	group_GSEA_Go_BP.csv	GO:0051988	GO:0051988	regulation of attachment of spindle microtubules to kinetochore	12	0.657827	1.81002	0.0434783	0.27652	0.242569	3412	tags=50%, list=18%, signal=41%	891/29127/10615/4751/90417/1894
15	group_GSEA_Go_BP.csv	GO:0001682	GO:0001682	tRNA 5'-leader removal	11	0.656757	1.81731	0.0263158	0.216015	0.189492	3738	tags=73%, list=20%, signal=58%	54913/79897/10248/51367/11102/10556/10775/10557
16	group_GSEA_Go_BP.csv	GO:0006297	GO:0006297	nucleotide-excision repair, DNA gap filling	23	0.65573	2.29821	0.027027	0.220242	0.1932	4628	tags=83%, list=25%, signal=62%	5424/5983/6117/10714/3978/6118/5111/7316/5425/5426/7314/7515/5984/5982/6119/7311/3980/5985/51426
17	group_GSEA_Go_BP.csv	GO:0099116	GO:0099116	tRNA 5'-end processing	15	0.655586	1.93361	0.0491803	0.295946	0.259609	3738	tags=67%, list=20%, signal=53%	54913/54974/79897/3028/10248/51367/11102/10556/10775/10557
18	group_GSEA_Go_BP.csv	GO:1904874	GO:1904874	positive regulation of telomerase RNA localization to Cajal body	15	0.655118	1.93223	0.0491803	0.295946	0.259609	5652	tags=80%, list=30%, signal=56%	8607/10856/55505/10574/6950/22948/1736/10576/10575/55651/7203/908
19	group_GSEA_Go_BP.csv	GO:0006744	GO:0006744	ubiquinone biosynthetic process	17	0.654674	2.15624	0.0153846	0.166289	0.145872	4364	tags=59%, list=23%, signal=45%	2232/27235/23590/51117/93058/29914/84274/51805/10229/57017
20	group_GSEA_Go_BP.csv	GO:1901663	GO:1901663	quinone biosynthetic process	17	0.654674	2.15624	0.0153846	0.166289	0.145872	4364	tags=59%, list=23%, signal=45%	2232/27235/23590/51117/93058/29914/84274/51805/10229/57017
21	group_GSEA_Go_BP.csv	GO:0034471	GO:0034471	ncRNA 5'-end processing	18	0.645792	2.11765	0.0175439	0.175973	0.154367	4823	tags=78%, list=26%, signal=58%	54913/29777/54974/79897/3028/10248/51367/11102/10556/10775/10557/9097/8602/27340
22	group_GSEA_Go_BP.csv	GO:0090670	GO:0090670	RNA localization to Cajal body	19	0.645019	2.16341	0.0178571	0.175973	0.154367	5652	tags=74%, list=30%, signal=52%	8607/5394/55135/10856/55505/10574/6950/22948/1736/10576/10575/55651/7203/908
23	group_GSEA_Go_BP.csv	GO:0090671	GO:0090671	telomerase RNA localization to Cajal body	19	0.645019	2.16341	0.0178571	0.175973	0.154367	5652	tags=74%, list=30%, signal=52%	8607/5394/55135/10856/55505/10574/6950/22948/1736/10576/10575/55651/7203/908
24	group_GSEA_Go_BP.csv	GO:0090672	GO:0090672	telomerase RNA localization	19	0.645019	2.16341	0.0178571	0.175973	0.154367	5652	tags=74%, list=30%, signal=52%	8607/5394/55135/10856/55505/10574/6950/22948/1736/10576/10575/55651/7203/908
25	group_GSEA_Go_BP.csv	GO:0090685	GO:0090685	RNA localization to nucleus	19	0.645019	2.16341	0.0178571	0.175973	0.154367	5652	tags=74%, list=30%, signal=52%	8607/5394/55135/10856/55505/10574/6950/22948/1736/10576/10575/55651/7203/908
26	group_GSEA_Go_BP.csv	GO:0032201	GO:0032201	telomere maintenance via semi-conservative replication	27	0.644703	2.30581	0.0454545	0.28213	0.24749	2984	tags=52%, list=16%, signal=44%	54107/2237/1763/5424/5983/6117/10714/6118/5111/5425/5426/5984/5982/6119
27	group_GSEA_Go_BP.csv	GO:0033314	GO:0033314	mitotic DNA replication checkpoint	10	0.643189	1.72842	0.0263158	0.216015	0.189492	3159	tags=40%, list=17%, signal=33%	135458/990/4998/90381
28	group_GSEA_Go_BP.csv	GO:1904872	GO:1904872	regulation of telomerase RNA localization to Cajal body	18	0.637137	2.08927	0.0175439	0.175973	0.154367	5652	tags=72%, list=30%, signal=50%	8607/5394/10856/55505/10574/6950/22948/1736/10576/10575/55651/7203/908
29	group_GSEA_Go_BP.csv	GO:0048753	GO:0048753	pigment granule organization	26	0.633703	2.30148	0.0384615	0.262223	0.230027	2176	tags=35%, list=12%, signal=31%	6490/4935/23682/10981/357/596/84062/434/3257
30	group_GSEA_Go_BP.csv	GO:0070131	GO:0070131	positive regulation of mitochondrial translation	17	0.631044	2.07841	0.0153846	0.166289	0.145872	2855	tags=41%, list=15%, signal=35%	26995/51335/285367/28958/84769/84300/23107
31	group_GSEA_Go_BP.csv	GO:0000466	GO:0000466	maturation of 5.8S rRNA from tricistronic rRNA transcript (SSU-rRNA, 5.8S rRNA, LSU-rRNA)	22	0.628936	2.16333	0.0232558	0.202702	0.177814	5533	tags=77%, list=30%, signal=55%	5393/117246/5394/23016/23404/29777/23481/6227/23246/51010/8602/27340/23212/11340/55759/65095/51077
32	group_GSEA_Go_BP.csv	GO:0006285	GO:0006285	base-excision repair, AP site formation	10	0.619671	1.66522	0.0263158	0.216015	0.189492	3778	tags=50%, list=20%, signal=40%	7374/4913/4968/23583/252969
33	group_GSEA_Go_BP.csv	GO:0032438	GO:0032438	melanosome organization	25	0.614129	2.13341	0.0357143	0.253655	0.222511	2176	tags=32%, list=12%, signal=28%	6490/4935/23682/10981/357/84062/434/3257
34	group_GSEA_Go_BP.csv	GO:0035646	GO:0035646	endosome to melanosome transport	10	0.606793	1.63062	0.0438596	0.27652	0.242569	4569	tags=60%, list=24%, signal=45%	23682/10981/84079/967/63915/8907
35	group_GSEA_Go_BP.csv	GO:0043485	GO:0043485	endosome to pigment granule transport	10	0.606793	1.63062	0.0438596	0.27652	0.242569	4569	tags=60%, list=24%, signal=45%	23682/10981/84079/967/63915/8907
36	group_GSEA_Go_BP.csv	GO:0048757	GO:0048757	pigment granule maturation	10	0.606793	1.63062	0.0438596	0.27652	0.242569	4569	tags=60%, list=24%, signal=45%	23682/10981/84079/967/63915/8907
37	group_GSEA_Go_BP.csv	GO:0043968	GO:0043968	histone H2A acetylation	16	0.598165	1.84372	0.0483871	0.293888	0.257805	5254	tags=62%, list=28%, signal=45%	8607/10856/86/10933/54556/80314/79829/8089/8295/10902
38	group_GSEA_Go_BP.csv	GO:0030150	GO:0030150	protein import into mitochondrial matrix	19	0.590302	1.97988	0.0178571	0.175973	0.154367	4798	tags=74%, list=26%, signal=55%	10452/728489/100287932/387990/29090/10245/80273/51025/54543/10440/131118/92609/10469/100652748
39	group_GSEA_Go_BP.csv	GO:0071025	GO:0071025	RNA surveillance	15	0.58754	1.73291	0.0491803	0.295946	0.259609	3874	tags=67%, list=21%, signal=53%	5393/5394/23016/23404/56915/53918/8559/6832/55795/51010
40	group_GSEA_Go_BP.csv	GO:0000460	GO:0000460	maturation of 5.8S rRNA	27	0.583275	2.08611	0.0454545	0.28213	0.24749	5533	tags=70%, list=30%, signal=50%	5393/117246/5394/23016/23404/29777/23481/6227/81887/23246/51010/8602/27340/23212/54512/11340/55759/65095/51077
41	group_GSEA_Go_BP.csv	GO:0016226	GO:0016226	iron-sulfur cluster assembly	19	0.57442	1.92662	0.0178571	0.175973	0.154367	4396	tags=53%, list=23%, signal=40%	654483/4682/64210/150274/10539/57019/10101/2395/27158/122961
42	group_GSEA_Go_BP.csv	GO:0031163	GO:0031163	metallo-sulfur cluster assembly	19	0.57442	1.92662	0.0178571	0.175973	0.154367	4396	tags=53%, list=23%, signal=40%	654483/4682/64210/150274/10539/57019/10101/2395/27158/122961
43	group_GSEA_Go_BP.csv	GO:0006743	GO:0006743	ubiquinone metabolic process	18	0.57362	1.88099	0.0350877	0.252007	0.221066	4364	tags=56%, list=23%, signal=43%	2232/27235/23590/51117/93058/29914/84274/51805/10229/57017
44	group_GSEA_Go_BP.csv	GO:0022616	GO:0022616	DNA strand elongation	27	0.571781	2.045	0.0454545	0.28213	0.24749	3466	tags=59%, list=18%, signal=48%	2237/51659/64785/1763/5983/10714/4176/3978/5111/5425/5426/5984/4172/64858/84296/10535
45	group_GSEA_Go_BP.csv	GO:0042776	GO:0042776	mitochondrial ATP synthesis coupled proton transport	19	0.562664	1.88719	0.0357143	0.253655	0.222511	2931	tags=42%, list=16%, signal=36%	10476/516/509/517/521/518/498/506
46	group_GSEA_Go_BP.csv	GO:0009264	GO:0009264	deoxyribonucleotide catabolic process	19	0.553595	1.85677	0.0357143	0.253655	0.222511	4129	tags=58%, list=22%, signal=45%	79077/30833/7374/4521/51071/4913/4968/23583/252969/55270/1854
47	group_GSEA_Go_BP.csv	GO:0000470	GO:0000470	maturation of LSU-rRNA	21	0.549932	1.85088	0.0238095	0.206974	0.181562	3893	tags=48%, list=21%, signal=38%	117246/6130/11224/23481/9326/65008/81887/23246/23560/6129
48	group_GSEA_Go_BP.csv	GO:0019883	GO:0019883	antigen processing and presentation of endogenous antigen	21	0.53445	1.79878	0.047619	0.290851	0.255141	1342	tags=33%, list=7%, signal=31%	910/909/972/913/3107/911/51752
49	group_GSEA_Go_BP.csv	GO:0000469	GO:0000469	cleavage involved in rRNA processing	22	0.530994	1.82644	0.0232558	0.202702	0.177814	5533	tags=68%, list=30%, signal=48%	5393/5394/23016/23404/29777/6227/23246/51010/8602/27340/23212/11340/55651/65095/51077
50	group_GSEA_Go_BP.csv	GO:0070129	GO:0070129	regulation of mitochondrial translation	25	0.511013	1.7752	0.0357143	0.253655	0.222511	4397	tags=44%, list=23%, signal=34%	26995/51335/285367/28958/84769/115416/84300/23107/81554/63899/708
51	group_GSEA_Go_BP.csv	GO:0007035	GO:0007035	vacuolar acidification	21	0.509755	1.71566	0.047619	0.290851	0.255141	4676	tags=62%, list=25%, signal=47%	10312/50617/54982/2896/8992/1201/147007/5538/1657/6556/84317/245972/9114
52	group_GSEA_Go_BP.csv	GO:0000715	GO:0000715	nucleotide-excision repair, DNA damage recognition	23	0.493047	1.72804	0.027027	0.220242	0.1932	4828	tags=70%, list=26%, signal=52%	142/5887/64708/7316/7314/9978/1643/8533/1642/7311/1069/51138/10980/8451/10920/50813
53	group_GSEA_Go_BP.csv	GO:0044703	GO:0044703	multi-organism reproductive process	984	-0.485766	-1.0666	0.04995	0.299746	0.262943	5535	tags=35%, list=30%, signal=26%	199720/83700/3236/254528/10916/10135/493/7076/57151/2185/54466/147912/2120/344758/3485/3965/10272/84225/5744/5926/7216/1761/7473/30812/6595/11077/10420/8900/151/8531/84868/7784/151056/54407/84519/339834/116/2296/7026/8613/26206/56155/952/84329/6862/80336/55779/171484/2743/23705/150921/1594/268/157777/2056/652/283417/5021/340784/3678/83890/8654/79582/5104/3857/58531/5676/2099/51742/64753/546/91181…
54	group_GSEA_Go_BP.csv	GO:0050767	GO:0050767	regulation of neurogenesis	795	-0.492661	-1.08044	0.037962	0.259893	0.227983	5308	tags=34%, list=28%, signal=25%	7473/6324/23529/30812/5754/2624/57165/4193/151/1742/4915/238/85458/1435/4208/84376/4909/4049/7025/116/3458/730094/2260/3611/127833/10215/952/4131/8200/2335/2056/5649/652/1746/3213/6469/23768/146433/56963/9181/5364/65249/55704/6604/27063/65009/6657/54437/1902/9912/57118/26052/6014/10500/5071/9863/3572/5629/7422/80725/26281/8829/6695/152330/126520/5270/2043/4763/54626/1524/3558/5997/23098/26011/536…
55	group_GSEA_Go_BP.csv	GO:0045597	GO:0045597	positive regulation of cell differentiation	935	-0.49356	-1.08379	0.018981	0.180734	0.158544	5539	tags=36%, list=30%, signal=27%	9037/10675/6197/338382/3596/100132074/3202/2185/221914/118738/3567/56975/10795/10562/3965/58495/55558/4017/2778/7473/6324/9398/23529/30812/5754/2624/6660/57165/151/1742/4915/238/168455/1435/4208/54806/4654/4049/10626/116/3458/2296/2260/3611/127833/685/1491/10215/115908/4131/1960/8200/2335/3214/1594/222008/2056/5649/652/1746/6469/4054/8651/8654/50604/146433/9181/5364/1052/5788/247/64581/941/4921/6…
56	group_GSEA_Go_BP.csv	GO:0001817	GO:0001817	regulation of cytokine production	674	-0.494649	-1.08392	0.040959	0.268831	0.235824	5190	tags=36%, list=28%, signal=27%	1969/3665/84868/7784/114771/4049/51744/10626/3568/116/3458/2260/1545/23220/2324/7128/2335/23705/54206/192683/260434/9466/10394/8651/9111/3623/2268/27250/6095/57336/353091/9181/5971/5788/247/3805/64581/941/11326/64135/4210/5600/57115/57162/373509/5734/51191/8832/55765/3572/64115/55366/3929/4050/3717/1191/26253/5027/79679/1524/3558/81793/112744/161882/3718/566/7100/353514/55612/2841/10464/23586/330…
57	group_GSEA_Go_BP.csv	GO:0045087	GO:0045087	innate immune response	890	-0.496919	-1.09091	0.011988	0.146842	0.128813	4920	tags=31%, list=26%, signal=24%	23705/3824/151636/1594/820/133060/57642/260434/10379/3441/8651/9111/5319/245938/4583/2268/146433/353091/2099/4688/9181/100431172/5971/3811/100049587/3805/64581/11326/11314/64135/4210/54625/57115/3868/57162/3444/2209/51191/79865/8832/55765/3437/55366/3929/3119/3717/2537/1191/245911/3383/245930/26253/1524/81793/3656/10462/23098/3718/7100/27293/135250/353514/83666/2635/1672/23586/330/4939/23569/3384…
58	group_GSEA_Go_BP.csv	GO:0051960	GO:0051960	regulation of nervous system development	900	-0.497102	-1.09123	0.011988	0.146842	0.128813	5187	tags=34%, list=28%, signal=26%	4193/151/1742/4915/238/85458/1435/4208/84376/4909/4049/7025/116/3458/730094/2260/3611/127833/7058/10215/952/4131/8200/2335/2056/5649/652/5021/1746/3213/6469/57408/23768/146433/56963/9181/5364/22859/6585/65249/55704/6604/145581/27063/65009/6657/54437/1902/347731/745/9912/57118/26052/6014/10500/5071/9863/3572/5629/51804/7422/23769/80725/26281/8829/6695/152330/126520/5270/2043/4763/54626/1524/3558/5…
59	group_GSEA_Go_BP.csv	GO:0042493	GO:0042493	response to drug	993	-0.497571	-1.09275	0.00899101	0.12375	0.108556	4314	tags=28%, list=23%, signal=23%	5071/55765/551/102723547/54658/26281/1365/3383/196/5244/5027/3766/8029/57578/1145/3558/113235/652968/5997/3767/1555/632/5141/1580/6623/429/3047/1133/768/346562/687/6586/1600/5979/221935/3747/186/84557/5727/3746/6005/6582/558/5076/5023/6538/6505/5603/5205/57468/1143/2769/7349/1946/80781/5468/590/4760/83884/8807/1141/341359/58530/440/54716/9066/5020/3071/148/9370/7732/3045/64849/6947/2693/6261/6662…
60	group_GSEA_Go_BP.csv	GO:0008285	GO:0008285	negative regulation of cell proliferation	654	-0.498657	-1.09264	0.027972	0.225908	0.198171	5062	tags=35%, list=27%, signal=27%	91862/116/64102/3458/7026/4194/3611/1545/8200/7128/5592/4969/127435/1594/652/55450/6469/2719/8654/22920/27250/5364/122042/247/6753/26160/941/11326/11314/54766/83593/65009/5600/6657/126695/22846/57162/563/9863/3437/5629/64115/339221/8862/3717/5270/26232/4763/79679/83595/3558/472/2192/26038/7832/389549/7940/23026/7041/10536/9510/6424/55612/687/6586/80173/7481/945/186/1029/5727/2213/5340/1051/55079/…
61	group_GSEA_Go_BP.csv	GO:0043410	GO:0043410	positive regulation of MAPK cascade	518	-0.500361	-1.09635	0.036963	0.257397	0.225794	5208	tags=36%, list=28%, signal=27%	8685/151/6366/4915/238/84868/57161/9821/116/2260/3611/2324/128853/55504/2690/2056/652/1847/9464/5319/8654/2911/5154/222643/3375/5788/2861/65009/5600/6657/1902/6014/55765/7422/3717/26281/8829/2492/246/3383/2043/5027/56034/3656/8324/846/7001/353514/389840/5979/2261/2213/799/6359/27179/2066/2247/6346/2255/3557/1880/2266/1942/3672/27178/959/6357/148/56300/389658/2688/1950/5031/1116/8600/7124/2626/636…
62	group_GSEA_Go_BP.csv	GO:0098609	GO:0098609	cell-cell adhesion	822	-0.500843	-1.09857	0.012987	0.15157	0.13296	4619	tags=34%, list=25%, signal=27%	56126/56107/51208/22859/26285/5788/941/11326/11314/145581/6657/81607/3142/57575/214/57162/64405/8641/23114/8832/3572/29119/7422/64115/28513/1005/3717/1365/246/29930/3383/152330/84665/5270/80709/79679/56100/1524/3558/5101/124872/2294/26011/7001/3718/1803/56103/9073/288/2895/56102/56123/56132/84695/60437/3384/1600/945/5979/221935/80139/11006/2213/56122/5340/1051/57126/30835/56111/56110/56104/11148/…
63	group_GSEA_Go_BP.csv	GO:0007167	GO:0007167	enzyme linked receptor protein signaling pathway	997	-0.50089	-1.10007	0.004995	0.0837585	0.0734746	3889	tags=25%, list=21%, signal=21%	7041/1796/25960/6424/493829/55612/79812/9046/348093/222584/8835/5979/2261/80139/186/859/151449/1288/558/81848/2257/2066/7080/83729/64399/2247/1030/8483/3690/2255/10220/1946/8997/1942/5801/51378/2152/3672/6935/4053/9068/3055/3071/4052/9370/8048/10468/2201/2693/114990/6662/2049/642658/10076/51206/2688/1950/4145/6653/2626/200958/3082/143686/374/2984/1956/651/9508/9982/627/2252/2321/2822/79652/4803/9…
64	group_GSEA_Go_BP.csv	GO:0048871	GO:0048871	multicellular organismal homeostasis	476	-0.502386	-1.09931	0.03996	0.26573	0.233104	4430	tags=32%, list=24%, signal=25%	3868/126695/563/2303/55765/8473/551/1280/6338/7422/55366/8862/10848/3717/2104/4763/5027/8029/11272/30061/1907/56034/125981/632/340146/283455/6319/56667/57822/79054/3953/653781/272/6005/1051/3690/653509/23746/53833/3910/3848/124220/4760/5020/4846/9370/54360/8626/6662/642658/7351/111/8600/7124/115861/84059/8809/1621/1956/50507/5950/66002/5881/1268/26154/6010/10874/5745/23090/6340/5334/53832/1149/63…
65	group_GSEA_Go_BP.csv	GO:0048589	GO:0048589	developmental growth	638	-0.50252	-1.10094	0.018981	0.180734	0.158544	4458	tags=28%, list=24%, signal=22%	65009/5600/6657/54437/3142/126695/214/2303/10500/5071/9863/5629/51804/7422/23769/10848/26281/8829/57578/2844/472/5997/8324/26011/1990/91461/688/57731/6586/7481/8835/2261/186/1294/859/5727/3953/51761/56920/2066/2247/4322/57468/321/2255/2620/1946/65059/768239/5324/340419/148/83481/4656/2693/1735/6662/6506/2688/85407/2626/57699/1291/2736/57167/374/6887/5950/2593/4133/627/2252/8292/4803/84258/10512/1…
66	group_GSEA_Go_BP.csv	GO:0009725	GO:0009725	response to hormone	965	-0.50289	-1.10437	0.002997	0.0595489	0.0522375	4053	tags=25%, list=22%, signal=21%	3767/57761/8204/10888/7832/167465/632/3718/4246/7041/114335/6424/493829/9420/1133/768/687/6586/8835/5241/80139/186/85315/5727/3953/9882/552/2645/799/83667/88/7080/266743/8743/2769/2255/3557/7349/4324/6752/1583/1946/85569/5468/1646/590/1141/58530/55885/93986/440/5020/4846/148/9370/8048/4656/2494/8626/2693/10002/10076/2688/10267/111/3673/5031/130120/4199/7124/6653/6096/10481/143686/374/1956/49/1082…
67	group_GSEA_Go_BP.csv	GO:0009611	GO:0009611	response to wounding	637	-0.503535	-1.10313	0.016983	0.175146	0.153641	4242	tags=29%, list=23%, signal=23%	3717/8829/246/100507027/5270/2043/4763/5027/2696/1524/2157/2192/2294/9060/8324/161882/23098/7001/688/22915/493829/8323/3047/139818/57822/859/725/5340/558/57126/3680/5023/3449/2066/5080/2247/2769/3690/54566/2255/51156/2266/3447/3848/2152/4638/5657/9066/959/120425/4846/90102/83481/4656/3045/6506/51206/3673/130120/5493/2626/10481/2039/1956/1607/1606/5068/2252/958/9315/9162/4988/158376/2625/84830/704…
68	group_GSEA_Go_BP.csv	GO:0040012	GO:0040012	regulation of locomotion	947	-0.504238	-1.10735	0.002997	0.0595489	0.0522375	4555	tags=30%, list=24%, signal=24%	5788/247/2886/53905/65249/64581/4921/11314/6546/65009/9048/54437/3868/1902/146206/22846/2303/55619/5734/57118/10500/9863/5629/7422/64115/80725/3929/390/3717/8829/3383/5270/4763/1907/1524/472/2192/56034/2294/846/6406/566/285966/9510/25960/2841/1672/23586/79812/79846/7481/5979/80139/186/55079/56920/2066/5080/1235/7080/405753/2247/9901/6346/3690/54566/2255/1880/83483/80781/3910/5468/3911/1942/5801/5…
69	group_GSEA_Go_BP.csv	GO:0007417	GO:0007417	central nervous system development	978	-0.504685	-1.10825	0.003996	0.0732048	0.0642167	4602	tags=29%, list=25%, signal=23%	2290/79864/8690/6712/546/6753/26160/6585/83992/65250/6546/2897/65009/6657/1902/745/64405/388610/5071/3572/1280/5629/51440/8829/1463/1191/1827/6695/152330/5270/2043/4763/3766/8941/80709/7482/8506/1524/116448/57477/472/5997/56034/63827/26038/7832/26011/389549/23026/25960/2895/429/8323/57731/84695/1600/64211/9143/57822/3747/186/23266/4861/7133/340260/5727/3746/4807/552/151449/2213/22983/558/55079/50…
70	group_GSEA_Go_BP.csv	GO:0007517	GO:0007517	muscle organ development	379	-0.504721	-1.10389	0.045954	0.283877	0.249023	5188	tags=35%, list=28%, signal=26%	1293/8531/4208/84159/10324/4654/57462/2296/2260/7026/497189/84976/1960/23414/1959/150921/652/6469/7135/58/27063/5600/3142/2303/5629/51804/26281/4763/6876/5997/56203/8324/6300/7832/161882/688/51778/493829/4621/859/127294/9172/2066/7139/2247/10791/3911/4638/93986/2273/51676/8048/4656/575/4634/6261/642658/3679/140578/4868/146862/9242/341405/5950/54567/10409/4607/7161/6899/93649/7040/844/60529/28514/…
71	group_GSEA_Go_BP.csv	GO:0001654	GO:0001654	eye development	360	-0.505495	-1.10512	0.044955	0.280659	0.246199	4289	tags=31%, list=23%, signal=25%	155051/5629/7422/5961/10848/8829/793/4763/5158/7482/57835/11081/84440/341640/5979/57822/221935/5076/4990/51761/9172/5080/2255/10220/7483/4760/6935/93986/1419/2201/2792/1735/6662/10002/631/85407/6096/146862/1956/5950/54567/348980/6010/6297/7111/2625/2916/7484/6496/6656/7040/7068/28514/654/5156/7475/2202/1290/5458/1296/118427/3624/57030/81029/246213/3982/43/91851/2780/7490/9573/1415/2048/668/1641/1…
72	group_GSEA_Go_BP.csv	GO:0048880	GO:0048880	sensory system development	369	-0.50576	-1.10583	0.042957	0.275608	0.241769	4289	tags=31%, list=23%, signal=25%	155051/5629/7422/5961/10848/8829/793/4763/5158/7482/57835/11081/84440/341640/5979/57822/221935/5076/4990/51761/9172/5080/2255/10220/7483/4760/6935/93986/1419/2201/2792/1735/6662/10002/631/85407/6096/146862/1956/5950/54567/348980/6010/6297/10371/7111/2625/2916/7484/6496/6656/7040/7068/28514/654/5156/7475/2202/64805/1290/5458/1296/118427/3624/57030/81029/246213/3982/43/91851/2780/7490/9573/1415/204…
73	group_GSEA_Go_BP.csv	GO:0042060	GO:0042060	wound healing	531	-0.506037	-1.10909	0.022977	0.202702	0.177814	4170	tags=29%, list=22%, signal=23%	5270/4763/5027/2157/2192/9060/8324/161882/7001/688/22915/493829/8323/3047/139818/57822/859/725/5340/558/57126/3680/5023/3449/2066/2247/2769/3690/54566/2255/51156/2266/3447/3848/2152/4638/5657/9066/959/120425/4846/90102/83481/4656/3045/51206/3673/130120/5493/2626/2039/1956/1607/1606/5068/958/9162/4988/158376/2625/84830/7040/9630/3273/5582/146850/325/5156/64805/8529/1001/6288/3046/1311/81029/3172/3…
74	group_GSEA_Go_BP.csv	GO:0051346	GO:0051346	negative regulation of hydrolase activity	441	-0.507396	-1.11061	0.030969	0.236428	0.207399	4307	tags=29%, list=23%, signal=23%	551/7422/80760/26998/2537/100507027/6695/5270/10406/5997/57718/27344/6691/149708/440503/330/256394/1294/3953/284293/5076/4642/59082/7139/4102/866/51156/7483/720/3434/3071/4846/140902/22914/440068/90199/1447/7124/50859/6653/89778/646424/3082/90853/1469/51050/4018/340267/27290/4133/151242/27328/5502/4803/728113/9162/57662/684/116154/280664/284257/3273/325/10156/1285/23145/140832/3933/5266/6317/1537…
75	group_GSEA_Go_BP.csv	GO:0031347	GO:0031347	regulation of defense response	775	-0.507716	-1.11315	0.00699301	0.103924	0.0911642	4522	tags=31%, list=24%, signal=24%	3805/64581/11326/11314/64135/4210/54625/145581/57115/5654/57162/56547/5734/51191/79865/55765/3572/388125/55366/3929/3717/1191/26253/80709/3558/472/9180/81793/2294/3656/10462/112744/23098/7100/27293/135250/353514/83666/23586/330/114132/3384/154064/56667/7133/149628/725/4584/2213/170482/1051/84699/30835/7294/9865/5603/405753/115362/6346/653509/1380/7349/53833/2266/50856/5468/3848/720/8807/353376/34…
76	group_GSEA_Go_BP.csv	GO:0007423	GO:0007423	sensory organ development	544	-0.507986	-1.11292	0.016983	0.175146	0.153641	5274	tags=38%, list=28%, signal=28%	3638/30812/5754/2624/1969/4915/256297/54806/4909/9992/25806/2296/2260/497189/1545/79955/115908/1412/8022/133060/652/1746/340784/6469/9464/1750/197021/3198/1413/10210/8825/1052/6604/6657/2303/3784/155051/1280/5629/51804/7422/51168/5961/10848/26281/8829/793/2043/4763/5158/7482/57835/579/11081/429/8323/84440/341640/5979/57822/221935/9132/5076/4990/51761/9172/5080/5205/2255/10220/2561/7483/4760/6935/…
77	group_GSEA_Go_BP.csv	GO:0150063	GO:0150063	visual system development	364	-0.50811	-1.1109	0.034965	0.251833	0.220913	4289	tags=32%, list=23%, signal=25%	155051/5629/7422/5961/10848/8829/793/4763/5158/7482/57835/11081/84440/341640/5979/57822/221935/5076/4990/51761/9172/5080/2255/10220/7483/4760/6935/93986/1419/2201/2792/1735/6662/10002/631/85407/6096/146862/1956/5950/54567/348980/6010/6297/7111/2625/2916/7484/6496/6656/7040/7068/28514/654/5156/7475/2202/64805/1290/5458/1296/118427/3624/57030/81029/246213/3982/43/91851/2780/7490/9573/1415/2048/668/…
78	group_GSEA_Go_BP.csv	GO:0003006	GO:0003006	developmental process involved in reproduction	660	-0.508297	-1.11376	0.00599401	0.0941182	0.0825623	5364	tags=38%, list=29%, signal=28%	10272/58495/84225/5926/3586/1761/10370/30812/2624/6595/3856/8531/1435/84159/7784/79805/84519/339834/116/2296/7026/497189/7022/638/80336/55779/171484/23414/8022/150921/6736/1594/268/157777/652/283417/3157/6469/3623/8654/79582/5104/8999/2099/6716/51742/4257/64753/546/91181/122042/247/1396/257062/23626/6847/5654/22846/344018/346673/51804/7422/55366/1045/146849/2492/3383/5270/402381/7482/472/8204/260…
79	group_GSEA_Go_BP.csv	GO:0008284	GO:0008284	positive regulation of cell proliferation	877	-0.508522	-1.11654	0.002997	0.0595489	0.0522375	3708	tags=27%, list=20%, signal=22%	64211/2261/80139/26051/186/859/552/79923/30835/5076/11148/2066/5080/2247/440560/3690/2255/57540/1880/80781/6708/1646/2152/6331/5324/1141/93986/5657/887/3055/441871/959/120425/343068/3071/6374/8626/2693/6662/642658/2350/1950/4145/3673/5031/130120/885/8091/7124/5087/7052/440561/2736/374/1956/6504/29126/7857/54567/5068/9982/2252/2321/100506013/958/5745/3481/684/1991/8644/3249/644943/6899/93649/367/3…
80	group_GSEA_Go_BP.csv	GO:0048729	GO:0048729	tissue morphogenesis	659	-0.509473	-1.1164	0.004995	0.0837585	0.0734746	5049	tags=33%, list=27%, signal=25%	2296/2260/4194/3611/84133/115908/6862/23135/3214/23414/652/57642/4148/2304/3678/6469/2719/9464/7135/94234/2099/5154/26160/65250/65266/58/27063/65009/9048/3868/146206/126695/2303/9096/26249/9863/5629/51804/7422/55366/3872/8829/2043/9245/7482/2294/8324/846/161882/9496/7041/8323/9420/768/7481/341640/5241/5979/57822/186/1294/859/5727/151449/127294/5076/9172/7080/80144/64399/7139/2247/3690/2255/3911/4…
81	group_GSEA_Go_BP.csv	GO:0051050	GO:0051050	positive regulation of transport	959	-0.509813	-1.11973	0.000999001	0.0293189	0.0257191	4561	tags=31%, list=24%, signal=25%	287/5788/247/10103/1794/64581/64135/23433/65266/27063/5600/8447/3759/6769/373509/3784/5734/57118/10142/50632/26052/5071/9863/551/7422/8862/3717/1191/5244/26253/5027/8941/2696/79679/3558/3767/440699/640/8564/846/112744/91608/566/285966/288/353514/340146/6424/55612/23586/25999/9143/945/3747/186/27159/859/5727/3746/552/2213/2645/1051/558/57126/799/51761/5023/88/2257/10345/6346/653509/7349/2266/5468/…
82	group_GSEA_Go_BP.csv	GO:2000145	GO:2000145	regulation of cell motility	875	-0.509958	-1.11951	0.003996	0.0732048	0.0642167	4555	tags=31%, list=24%, signal=25%	5788/247/2886/53905/64581/4921/11314/6546/65009/54437/3868/1902/146206/22846/2303/55619/5734/57118/10500/9863/5629/7422/64115/80725/3929/390/3717/8829/3383/5270/4763/1907/1524/472/2192/56034/2294/6406/285966/9510/25960/2841/1672/23586/79812/79846/7481/5979/80139/186/56920/2066/5080/1235/7080/405753/2247/9901/6346/3690/54566/2255/1880/83483/80781/3910/5468/3911/1942/5801/51378/2152/4638/222487/640…
83	group_GSEA_Go_BP.csv	GO:0014070	GO:0014070	response to organic cyclic compound	893	-0.510867	-1.1216	0.001998	0.0457645	0.0401455	4496	tags=29%, list=24%, signal=23%	64135/3248/6546/58/27063/257062/57162/3444/3784/10142/5071/551/54658/3717/2104/1191/3383/50616/196/5244/5027/3767/8204/2294/10888/846/7832/167465/632/610/4246/7041/688/429/9420/23586/768/687/6586/8835/5241/221935/80139/3747/186/85315/84557/5727/552/1051/799/5023/3449/266743/2255/3557/7349/4324/6752/1946/3447/2561/5468/590/1141/55885/93986/440/3434/5020/9370/4656/2494/2242/8626/2693/6261/1234/3728…
84	group_GSEA_Go_BP.csv	GO:0019221	GO:0019221	cytokine-mediated signaling pathway	750	-0.511035	-1.12015	0.00699301	0.103924	0.0911642	4314	tags=31%, list=23%, signal=24%	5071/3437/3572/7422/3929/3119/4050/3717/2537/246/3383/50616/1907/1524/3558/9180/3656/6624/112744/3718/386653/1796/83666/25999/330/4939/6586/3587/8835/608/7133/3953/50615/79923/558/7294/6359/3449/27179/1235/282617/2247/6346/3557/53833/27189/83483/3447/5468/3911/3875/2152/6935/10538/8807/440712/353376/5657/27178/834/3434/3055/959/6357/9370/6374/7850/3936/282616/56300/1234/9705/3433/4128/8600/7124/5…
85	group_GSEA_Go_BP.csv	GO:0007599	GO:0007599	hemostasis	325	-0.511466	-1.1167	0.032967	0.24444	0.214428	4170	tags=30%, list=22%, signal=24%	5270/5027/2157/2192/9060/161882/7001/22915/8323/3047/139818/725/5340/558/57126/5023/3449/2769/3690/51156/2266/3447/3848/2152/5657/959/4846/3045/51206/3673/2626/2039/1607/1606/958/9162/2625/84830/9630/3273/5582/146850/5156/64805/8529/6288/3046/1311/3172/3569/2153/3456/83706/3053/10077/5197/653145/170692/3439/51266/10630/5026/18/5328/5054/2207/57834/2191/1906/5155/150/2162/9002/7035/2313/10544/3750…
86	group_GSEA_Go_BP.csv	GO:0007596	GO:0007596	blood coagulation	320	-0.512844	-1.12012	0.028971	0.23039	0.202103	4170	tags=30%, list=22%, signal=24%	5270/5027/2157/2192/9060/161882/7001/22915/8323/3047/139818/725/5340/558/57126/5023/3449/2769/3690/51156/2266/3447/3848/2152/5657/959/4846/3045/51206/3673/2626/2039/1607/1606/958/9162/2625/84830/9630/3273/5582/146850/5156/64805/8529/6288/3046/1311/3172/3569/2153/3456/83706/3053/10077/5197/653145/170692/3439/51266/10630/5026/18/5328/5054/2207/57834/2191/1906/5155/150/2162/9002/7035/10544/375033/68…
87	group_GSEA_Go_BP.csv	GO:0008544	GO:0008544	epidermis development	459	-0.512881	-1.12221	0.017982	0.175973	0.154367	5369	tags=42%, list=29%, signal=31%	10083/58495/6706/5744/6304/3859/353145/10628/440021/3856/1969/3850/4909/25932/10626/319101/2296/2260/85293/81872/79955/353140/54474/1825/55504/1594/54206/652/284827/85291/147495/2304/6469/1041/3857/50604/94234/5154/728299/247/26160/3868/126695/3886/6701/55366/1308/3855/3872/653240/81871/8689/43849/4763/643418/125981/100129271/3883/8688/3891/6424/8323/55612/730755/80173/57822/3854/85294/1294/5727/…
88	group_GSEA_Go_BP.csv	GO:0045785	GO:0045785	positive regulation of cell adhesion	396	-0.51308	-1.12269	0.017982	0.175973	0.154367	4305	tags=31%, list=23%, signal=25%	3572/7422/64115/3717/8829/246/3383/79679/3558/472/2294/1842/3718/1803/566/288/22915/55612/79812/80173/5979/11006/30835/4811/11148/54566/2266/6708/959/3071/22914/9840/3728/10076/3673/8600/7124/7052/3135/2736/2039/1493/29126/5881/1949/3481/1991/2625/3606/126259/10085/7040/3273/4887/146850/57091/57829/64805/7535/100133941/6288/912/7292/5063/10326/7704/3569/6422/8631/335/25975/55083/25890/5133/10673/…
89	group_GSEA_Go_BP.csv	GO:0048598	GO:0048598	embryonic morphogenesis	577	-0.513173	-1.12435	0.00899101	0.12375	0.108556	5369	tags=37%, list=29%, signal=27%	10083/58495/2778/3586/7473/3638/30812/153572/140467/23528/5754/2624/1969/4208/54806/25806/2296/2260/497189/79955/115908/8200/6862/2335/23135/3214/133060/652/1746/340784/3213/2304/3678/6469/2719/9464/1750/3198/83881/3215/26160/65250/65009/6657/3142/126695/2303/9096/1280/5629/51804/51168/8862/7482/83595/2294/8324/26011/579/9496/7041/4325/8323/3216/4621/348093/7481/2114/341640/5979/57822/1294/5727/1…
90	group_GSEA_Go_BP.csv	GO:0051270	GO:0051270	regulation of cellular component movement	957	-0.513751	-1.12836	0.000999001	0.0293189	0.0257191	4561	tags=31%, list=24%, signal=25%	287/5788/247/2886/53905/65249/64581/4921/11314/6546/65009/54437/3868/1902/3759/146206/22846/2303/55619/5734/57118/10142/10500/9863/8701/5629/29119/7422/64115/80725/3929/390/3717/8829/3383/5270/4763/1907/1524/472/2192/56034/2294/6406/285966/9510/25960/2841/1672/23586/79812/79846/7481/5979/80139/186/859/55079/56920/2066/5080/1235/7080/405753/2247/9901/6346/3690/54566/2255/1880/83483/80781/3910/5468…
91	group_GSEA_Go_BP.csv	GO:0042330	GO:0042330	taxis	629	-0.51455	-1.12739	0.002997	0.0595489	0.0522375	4817	tags=37%, list=26%, signal=28%	2277/6469/57408/5319/387695/220164/23768/3730/6036/9732/5154/6712/5364/2886/6585/1794/65249/51554/9048/54437/1902/9211/214/57118/3800/23114/10500/7422/3929/8829/152330/84665/2043/30817/1907/1524/846/90249/6710/219699/566/389549/1796/25960/57731/2841/1672/9420/9046/6586/1600/5979/5727/151449/55079/57449/3680/6359/56920/27179/5080/1235/7080/2247/6346/3690/2255/3557/1880/1946/6708/1942/56956/2152/36…
92	group_GSEA_Go_BP.csv	GO:0071363	GO:0071363	cellular response to growth factor stimulus	661	-0.514924	-1.12823	0.002997	0.0595489	0.0522375	3889	tags=25%, list=21%, signal=21%	7041/25960/6424/55612/79812/348093/2261/80139/186/7133/859/151449/5076/81848/2257/2066/7080/64399/2247/1030/8483/3690/2255/6935/4053/4052/4656/10468/2201/114990/6662/642658/6653/2626/3082/1956/50507/54567/9508/9982/627/2252/2321/3576/79652/4803/9315/23090/2625/1149/6899/7498/93649/63978/7040/8425/10266/3273/28514/2251/9001/654/5156/9350/27302/1961/203100/8074/1311/6422/2662/1634/390598/9638/8631/…
93	group_GSEA_Go_BP.csv	GO:0051962	GO:0051962	positive regulation of nervous system development	526	-0.514935	-1.12847	0.004995	0.0837585	0.0734746	5308	tags=37%, list=28%, signal=27%	7473/6324/23529/30812/5754/2624/57165/151/1742/4915/238/1435/4208/4049/116/3458/2260/3611/127833/7058/10215/4131/8200/2335/2056/5649/652/5021/1746/6469/57408/23768/146433/9181/5364/22859/6604/27063/65009/1902/347731/745/57118/6014/5071/9863/3572/5629/7422/23769/26281/8829/126520/5270/2043/1524/3558/5997/26011/576/389549/2895/429/1600/64211/8835/5979/7133/151449/26045/55079/5076/51761/94030/11141/…
94	group_GSEA_Go_BP.csv	GO:0061061	GO:0061061	muscle structure development	616	-0.515155	-1.12879	0.002997	0.0595489	0.0522375	4486	tags=29%, list=24%, signal=23%	6604/6546/58/27063/5600/3142/4773/2303/442721/5629/51804/7422/26281/7478/84665/4763/341676/6876/5997/56203/2294/8324/6300/7832/161882/688/27295/51778/493829/4621/348093/186/859/552/127294/10529/88/9172/2066/7139/2247/2255/10791/3911/6935/4638/93986/2273/51676/148/8048/4656/575/4634/93166/6261/6662/642658/3679/963/140578/202151/85407/7124/4868/2626/146862/9242/8536/23462/50507/341405/5950/54567/11…
95	group_GSEA_Go_BP.csv	GO:0030334	GO:0030334	regulation of cell migration	817	-0.515197	-1.12979	0.002997	0.0595489	0.0522375	3495	tags=26%, list=19%, signal=22%	2066/5080/1235/7080/2247/9901/6346/3690/54566/2255/1880/83483/80781/3910/5468/3911/1942/5801/51378/2152/4638/222487/3071/4846/90102/27286/9370/22914/83481/575/1602/131578/4345/6662/3728/10076/1950/3673/5031/7124/6653/54509/170825/6364/3082/7130/2039/1956/50507/29126/54567/9982/2252/5362/2321/100506013/958/3576/2822/326/2833/10512/340533/51225/10371/57662/684/1991/2625/6750/3486/84830/93649/7040/3…
96	group_GSEA_Go_BP.csv	GO:0006935	GO:0006935	chemotaxis	627	-0.515649	-1.12995	0.001998	0.0457645	0.0401455	4817	tags=37%, list=26%, signal=28%	2277/6469/57408/5319/387695/220164/23768/3730/6036/9732/5154/6712/5364/2886/6585/1794/65249/51554/9048/54437/1902/9211/214/57118/3800/23114/10500/7422/3929/8829/152330/84665/2043/30817/1907/1524/846/90249/6710/219699/566/389549/1796/25960/57731/2841/1672/9420/9046/6586/1600/5979/5727/151449/55079/57449/3680/6359/56920/27179/5080/1235/7080/2247/6346/3690/2255/3557/1880/1946/6708/1942/56956/2152/36…
97	group_GSEA_Go_BP.csv	GO:0051093	GO:0051093	negative regulation of developmental process	911	-0.515891	-1.13261	0.000999001	0.0293189	0.0257191	4469	tags=32%, list=24%, signal=25%	5140/5600/6657/54437/57115/3142/1902/4773/22846/2303/9096/862/26052/6014/10500/5071/51804/7422/8829/6695/152330/2043/4763/1524/3558/2192/5997/57761/54829/8324/112744/161882/7001/3718/579/576/7041/429/493829/55612/494551/79812/84695/348093/1600/7481/221044/8835/2261/859/5727/11006/2213/3205/55079/5076/56920/2066/5080/7080/440560/3690/2255/1401/1071/10220/57540/1946/5468/7483/1942/51378/6935/441871…
98	group_GSEA_Go_BP.csv	GO:0050817	GO:0050817	coagulation	324	-0.515911	-1.12658	0.018981	0.180734	0.158544	4170	tags=31%, list=22%, signal=24%	5270/5027/2157/2192/9060/161882/7001/6406/22915/8323/3047/139818/725/5340/558/57126/5023/3449/2769/3690/51156/2266/3447/3848/2152/5657/222537/959/6407/4846/3045/51206/3673/2626/2039/1607/1606/958/9162/2625/84830/9630/3273/5582/146850/5156/64805/8529/6288/3046/1311/3172/3569/2153/3456/83706/3053/10077/5197/653145/170692/3439/51266/10630/5026/18/5328/5054/2207/57834/2191/1906/5155/150/2162/9002/703…
99	group_GSEA_Go_BP.csv	GO:0070848	GO:0070848	response to growth factor	690	-0.516206	-1.13101	0.001998	0.0457645	0.0401455	3889	tags=25%, list=21%, signal=21%	7041/25960/6424/429/55612/79812/348093/2261/80139/3747/186/7133/859/3746/151449/5076/81848/2257/2066/7080/64399/2247/1030/8483/3690/2255/6935/4053/4052/4656/10468/2201/114990/6662/642658/6653/2626/3082/1956/50507/54567/9508/9982/627/2252/2321/3576/79652/4803/9315/23090/4988/2625/1149/6899/7498/93649/63978/7040/8425/10266/3273/28514/2251/9001/654/5156/9350/27302/1961/203100/8074/1311/6422/2662/163…
100	group_GSEA_Go_BP.csv	GO:0009913	GO:0009913	epidermal cell differentiation	354	-0.516351	-1.12876	0.015984	0.169482	0.148673	5246	tags=42%, list=28%, signal=31%	3859/353145/10628/440021/3856/1969/3850/25932/10626/319101/2296/2260/85293/81872/79955/353140/54474/1825/1594/54206/652/284827/85291/1041/3857/50604/728299/247/3868/126695/3886/6701/3855/3872/653240/81871/8689/43849/643418/125981/100129271/3883/8688/3891/6424/730755/80173/3854/85294/5727/353142/8643/5080/140807/6698/25984/337976/3890/3875/3848/353131/8626/286887/3882/3889/3728/23086/130120/6820/5…
101	group_GSEA_Go_BP.csv	GO:0031589	GO:0031589	cell-substrate adhesion	345	-0.516423	-1.12851	0.016983	0.175146	0.153641	4278	tags=29%, list=23%, signal=23%	7422/80725/1308/3717/8829/246/22795/6695/4763/2192/2294/8324/1842/22915/55612/79812/1029/5340/558/4811/88/50509/4059/3690/57348/22798/2266/1946/3911/1942/3672/3694/90102/2049/3728/3679/3673/2039/5881/340533/10225/57662/401827/10085/3273/4887/57091/5880/6422/8631/83706/335/25975/683/5175/25890/2199/64098/8515/10630/375567/5328/5054/25992/158326/146183/7412/129080/94/285/7010/133584/151887/63923/10…
102	group_GSEA_Go_BP.csv	GO:0010466	GO:0010466	negative regulation of peptidase activity	243	-0.517219	-1.12427	0.043956	0.27652	0.242569	4307	tags=34%, list=23%, signal=27%	551/7422/80760/26998/2537/6695/5270/10406/27344/6691/149708/330/256394/1294/284293/5076/59082/4102/866/51156/7483/720/140902/440068/90199/1447/50859/6653/89778/646424/3082/1469/51050/4018/340267/27290/4803/728113/684/280664/3273/1285/23145/140832/3933/5266/6317/3053/1475/153218/114769/11005/653145/6692/5743/5272/8710/8740/27151/5054/124857/1472/327657/4318/183/7035/404203/710/57119/2/358/718/7079…
103	group_GSEA_Go_BP.csv	GO:0098542	GO:0098542	defense response to other organism	476	-0.51784	-1.13312	0.00699301	0.103924	0.0911642	4797	tags=33%, list=26%, signal=25%	9466/10379/3441/5319/387695/245938/2268/4353/6036/5788/64581/64135/57115/5654/3444/51191/389852/3437/3929/2537/245911/245930/26253/5027/84871/6406/566/7100/83666/2635/1672/23586/330/114132/4939/100423062/602/353142/1051/3449/282617/284297/1401/3447/85569/10538/613211/3434/6407/22914/575/6280/55601/282616/613210/3433/146857/130120/7124/56832/6364/9636/246778/5650/338322/958/10578/25818/684/1991/38…
104	group_GSEA_Go_BP.csv	GO:0051051	GO:0051051	negative regulation of transport	470	-0.51826	-1.13396	0.00599401	0.0941182	0.0825623	5485	tags=38%, list=29%, signal=28%	1409/9607/65268/2185/7114/23208/2669/161253/3965/3753/55691/3586/5552/3638/255027/65267/29091/151/1742/26056/9992/91319/116/497189/114088/255057/4131/7128/2335/345/192683/2056/5021/6469/124930/9466/3623/4828/55022/9478/64111/11314/65266/5734/8832/5071/80725/55366/100507027/3383/5270/4763/5997/3767/2294/6406/5569/7779/91461/285966/288/353514/6424/55612/945/186/7133/859/150696/9882/2213/26045/88/22…
105	group_GSEA_Go_BP.csv	GO:0031349	GO:0031349	positive regulation of defense response	492	-0.518613	-1.13553	0.004995	0.0837585	0.0734746	4522	tags=31%, list=24%, signal=24%	3805/64581/11314/64135/57115/57162/5734/55765/3572/388125/55366/3929/3717/26253/3558/9180/81793/3656/10462/112744/23098/7100/27293/135250/353514/83666/23586/330/3384/154064/56667/149628/4584/170482/1051/84699/30835/7294/9865/5603/115362/6346/653509/7349/2266/50856/8807/353376/3055/22914/6280/84630/55601/94025/3673/394263/130120/885/8600/7124/56832/4582/200958/7052/3135/2672/1956/4068/5650/1268/33…
106	group_GSEA_Go_BP.csv	GO:0090257	GO:0090257	regulation of muscle system process	229	-0.519978	-1.12979	0.045954	0.283877	0.249023	4931	tags=38%, list=26%, signal=28%	5592/54206/114907/5021/9464/8654/481/7135/30845/9732/287/6546/3759/3784/10142/3572/29119/1907/389524/5997/2982/7133/859/5023/7139/1143/7349/6752/6331/5020/4846/388591/148/4656/4634/2693/3728/3673/7125/2626/1824/59272/10874/4607/93649/844/4887/1131/27302/3778/6329/3736/9472/10203/5318/816/3488/6262/80763/5743/389827/4608/6870/18/2660/1193/2946/477/1906/56923/1129/1264/183/150/5999/4842/10008/5294/…
107	group_GSEA_Go_BP.csv	GO:0003002	GO:0003002	regionalization	350	-0.520762	-1.13801	0.00699301	0.103924	0.0911642	5155	tags=38%, list=27%, signal=28%	4208/54806/4909/25806/2296/2260/7026/497189/84976/6862/3214/1959/8022/5649/92129/652/1746/3213/6469/2719/80055/3215/26160/6604/2303/9096/1045/7478/8829/7482/54626/472/2294/7832/389549/429/3216/10655/2114/5727/3205/55079/5076/390992/5080/7080/64399/2255/3224/10220/3227/4760/344022/163589/8626/4222/85407/5087/2626/170825/2736/23462/54567/5362/10512/10409/10371/6899/367/57801/6496/58524/6656/3218/60…
108	group_GSEA_Go_BP.csv	GO:0014706	GO:0014706	striated muscle tissue development	360	-0.520812	-1.13861	0.00899101	0.12375	0.108556	4477	tags=31%, list=24%, signal=24%	6546/58/27063/65009/5600/3142/2303/5629/51804/7422/10848/26281/7478/4763/5997/56203/8324/7832/161882/26011/688/51778/186/859/127294/10529/88/9172/2066/7139/2247/10791/93986/51676/148/8048/4656/4634/6261/642658/4868/2626/9242/50507/341405/5950/54567/10512/4607/7161/6899/93649/7040/844/28514/5156/129446/26471/27302/9750/2138/1634/221662/9472/7490/64321/1301/5318/668/6262/5081/26508/650/3792/4892/26…
109	group_GSEA_Go_BP.csv	GO:0051896	GO:0051896	regulation of protein kinase B signaling	216	-0.522094	-1.13342	0.041958	0.272916	0.239407	3697	tags=30%, list=20%, signal=24%	5979/2261/859/558/799/2066/2247/2255/1646/2152/1950/1116/8600/7124/2626/3082/3135/143686/374/1956/50507/2252/3481/8644/2625/388121/7498/3606/57333/7066/7040/2251/5156/642273/64805/7039/8074/5008/3059/5880/118788/255324/79727/389400/3488/1813/2246/2660/85453/9365/6348/5155/7010/2263/2250/5314/2254/4653/5159/2069/284/2155/5294/10268/1440
110	group_GSEA_Go_BP.csv	GO:0045444	GO:0045444	fat cell differentiation	209	-0.52223	-1.13307	0.048951	0.29568	0.259377	4056	tags=27%, list=22%, signal=22%	252995/5997/57761/161882/7041/688/149685/25999/11197/1051/2255/5468/55885/9370/6783/8091/7124/4151/2625/6097/3356/7040/1050/10974/4320/81029/7704/3569/6422/59344/2662/153/5919/9573/7350/51316/201501/5743/650/2487/148979/338557/3625/3589/64641/114899/85329/4023/374462/6423/7021/84935/392255/1240/7471/3358/7494
111	group_GSEA_Go_BP.csv	GO:0010721	GO:0010721	negative regulation of cell development	327	-0.52232	-1.14073	0.010989	0.140748	0.123467	4452	tags=31%, list=24%, signal=24%	6657/54437/1902/26052/6014/10500/7422/8829/6695/152330/2043/4763/2192/5997/429/494551/1600/859/55079/56920/2066/5080/10220/57540/1946/1942/1735/6662/6900/7124/6653/5087/144347/430/2039/2672/23462/4133/10512/340533/1949/7161/10371/1630/57801/6496/6658/7040/7068/28514/1840/6696/7224/3199/5458/1903/112755/3569/2045/3196/79727/374946/4168/2048/84894/53335/7476/2487/9353/10718/4916/4821/11202/25791/63…
112	group_GSEA_Go_BP.csv	GO:0003012	GO:0003012	muscle system process	428	-0.522398	-1.14293	0.003996	0.0732048	0.0642167	5498	tags=43%, list=29%, signal=31%	84163/493/2702/800/9127/70/3753/29765/4660/6324/143872/51086/151/4622/5024/4208/2628/10324/9992/4654/497189/952/5592/54206/5021/9464/8654/481/4632/7135/30845/9732/287/7169/6546/58/3759/6769/3784/3572/442721/29119/10848/4619/1907/4620/389524/1145/5997/56203/6641/51778/493829/4621/2982/186/7133/859/127294/51761/5023/88/9172/2257/10345/7139/1143/7349/6752/10316/6331/3672/92241/1141/4638/5020/4846/38…
113	group_GSEA_Go_BP.csv	GO:0051961	GO:0051961	negative regulation of nervous system development	304	-0.522648	-1.13988	0.010989	0.140748	0.123467	3042	tags=25%, list=16%, signal=22%	55079/56920/2066/5080/10220/57540/1942/1735/6662/6900/7124/6653/5087/430/2672/23462/4133/10512/340533/1949/7161/10371/1630/57801/6496/6658/7040/4761/7068/28514/1840/6696/7224/3199/5458/112755/3569/2045/3196/79727/374946/4168/2048/84894/53335/7476/9353/8646/10718/4916/4821/11202/25791/6356/9241/223117/655/63923/4854/7143/7097/7101/1620/7225/4776/54328/4504/9723/1281/7070/3553/344901/146760/10660/5…
114	group_GSEA_Go_BP.csv	GO:0019725	GO:0019725	cellular homeostasis	947	-0.523665	-1.15001	0.000999001	0.0293189	0.0257191	3686	tags=25%, list=20%, signal=21%	79054/186/859/6543/552/6005/2645/55630/799/5076/6359/5023/10345/1235/10161/2247/57468/2769/6346/9170/1946/79608/4760/222546/887/5020/4846/6357/148/8048/6280/2898/9429/6261/1234/3171/111/64714/5031/496/776/115861/2626/7052/730/50507/126306/1909/57393/1268/26154/958/57338/728215/2822/8938/10874/2833/5745/1233/80201/1991/2829/51310/3356/643/7040/55107/3745/844/4887/89885/5030/9001/654/5156/187/1215/…
115	group_GSEA_Go_BP.csv	GO:2000027	GO:2000027	regulation of animal organ morphogenesis	251	-0.524098	-1.1404	0.025974	0.216015	0.189492	5286	tags=36%, list=28%, signal=26%	10370/30812/1361/5754/1435/54806/2296/2260/84133/115908/7128/652/6469/2719/9464/2099/5154/2303/265/9863/51804/7422/55366/7482/54829/8324/152816/8323/7481/57822/186/859/5076/2255/3227/93986/340419/388591/1735/6662/85407/7124/3082/166336/2252/10512/10409/122706/2625/3249/6899/367/7484/58524/7040/7068/10082/7475/27302/6422/2138/7490/64321/860/4982/7476/650/80326/2246/143471/9241/1906/183/7042/655/22…
116	group_GSEA_Go_BP.csv	GO:0030900	GO:0030900	forebrain development	375	-0.524129	-1.14602	0.003996	0.0732048	0.0642167	5171	tags=37%, list=28%, signal=27%	4915/238/85458/84376/54407/25806/116/2260/7026/10215/4929/23135/5592/8022/5649/652/5021/1746/6469/80055/546/6753/6585/6546/6657/1902/5629/8829/4763/8941/80709/7482/63827/26038/7832/389549/429/1600/64211/3747/340260/3746/552/151449/558/55079/1767/219409/2066/5080/7080/4642/2255/6752/6331/4760/1141/93986/2049/6900/6506/170825/2736/6887/55118/1956/140679/6754/5881/10371/2173/6496/6658/6656/9001/4142…
117	group_GSEA_Go_BP.csv	GO:0008406	GO:0008406	gonad development	215	-0.524397	-1.13802	0.035964	0.253655	0.222511	5406	tags=41%, list=29%, signal=29%	344758/10272/5926/1761/10370/30812/8531/84159/7784/116/2296/7022/638/23414/6736/268/3157/3623/2099/6716/51742/4257/546/91181/122042/23626/51804/7422/2492/3383/7482/472/8204/9510/6586/5241/728395/3205/1051/7080/8743/2620/56956/4846/6662/642658/642636/2626/63951/10409/10371/8644/2625/367/4142/5156/26471/400629/3624/5798/6422/7490/431707/269/4327/668/9353/190/130497/728137/132625/3625/2697/3973/7042…
118	group_GSEA_Go_BP.csv	GO:0045137	GO:0045137	development of primary sexual characteristics	221	-0.524543	-1.13886	0.036963	0.257397	0.225794	5406	tags=41%, list=29%, signal=29%	344758/10272/5926/1761/10370/30812/8531/84159/7784/116/2296/7022/638/23414/6736/268/3157/3623/2099/6716/51742/4257/546/91181/122042/23626/51804/7422/2492/3383/7482/472/8204/9510/6586/5241/728395/3205/1051/7080/8743/2620/56956/4846/1602/6662/642658/642636/2626/63951/10409/10371/8644/2625/367/4142/5156/26471/400629/3624/5798/6422/7490/431707/269/4327/668/9353/190/130497/728137/117/132625/3625/2697/…
119	group_GSEA_Go_BP.csv	GO:0009607	GO:0009607	response to biotic stimulus	936	-0.524602	-1.15198	0.000999001	0.0293189	0.0257191	4896	tags=34%, list=26%, signal=26%	129530/151636/57088/1594/820/2056/2277/9466/2719/10379/3441/5319/387695/245938/389643/2268/27250/4353/6036/22806/4257/55509/7456/5788/11238/64581/941/3001/64135/3248/27063/5600/57115/5654/57162/3444/254827/5734/51191/55765/389852/3437/3929/54658/3717/2537/1191/245911/3383/55026/126520/245930/26253/5027/8029/79679/1524/8564/3656/84871/7001/6406/566/7100/83666/2635/1672/23586/330/114132/4939/100423…
120	group_GSEA_Go_BP.csv	GO:0007507	GO:0007507	heart development	546	-0.524614	-1.14929	0.001998	0.0457645	0.0401455	4561	tags=30%, list=24%, signal=24%	287/26160/1396/65250/6604/6546/27063/65009/5600/2303/11174/8701/1280/5629/7422/8862/10848/26281/7478/8829/4763/472/5997/118856/2294/8324/161882/26011/9510/27295/429/6586/80173/7481/341640/186/7133/859/5727/127294/10529/88/1767/9172/2257/2066/7139/2247/5468/1942/6331/344022/5020/4846/4052/388591/148/8048/4634/6261/6662/642658/2626/2736/57167/23462/1956/50507/1909/5950/54567/4151/100506013/10512/10…
121	group_GSEA_Go_BP.csv	GO:0030155	GO:0030155	regulation of cell adhesion	666	-0.524621	-1.14947	0.001998	0.0457645	0.0401455	4305	tags=32%, list=23%, signal=26%	3572/388125/7422/64115/3717/8829/246/3383/6695/5270/4763/80709/79679/3558/472/2192/124872/2294/8324/7001/1842/3718/1803/566/27299/288/22915/55612/79812/80173/84695/1600/5979/80139/1029/11006/2213/5340/1051/30835/4811/11148/54566/3557/53833/2266/1946/6708/3910/3911/1942/959/3071/90102/9370/22914/2242/9840/6662/2049/3728/10076/3673/394263/8600/7124/4582/7052/3135/2736/3714/2039/1493/29126/30009/588…
122	group_GSEA_Go_BP.csv	GO:0097305	GO:0097305	response to alcohol	227	-0.525422	-1.14141	0.035964	0.253655	0.222511	4501	tags=32%, list=24%, signal=25%	6517/3248/5734/551/54658/1365/3383/196/57578/3558/5997/632/687/6586/3747/5727/552/266743/1946/5468/1646/1141/5020/9370/1234/3728/111/5031/1621/5950/1268/2822/4988/8644/2625/7040/761/5030/1446/3624/7292/6422/3359/3283/7200/4747/9353/2902/1813/1394/18/4916/6354/117/2660/5732/6348/23209/7412/6531/5179/5999/2263/3284/1392/999/2155/3351/114/57476/2904/5737/1440
123	group_GSEA_Go_BP.csv	GO:0021700	GO:0021700	developmental maturation	279	-0.525826	-1.14605	0.012987	0.15157	0.13296	4585	tags=35%, list=24%, signal=27%	5364/22859/122042/64581/23294/162466/257062/84530/23114/7422/440279/4763/8941/10882/6855/1524/63827/6406/5991/429/55612/57731/1672/494551/5241/5979/2261/558/5076/1235/10220/2266/5468/440712/6407/163589/6261/6900/2688/631/342035/144347/10481/100131137/5881/8938/5745/2625/168620/6496/4761/1050/54345/1001/5064/57030/5798/378807/3050/860/816/53335/11005/50944/5139/1618/8642/4747/650/26468/163175/2902…
124	group_GSEA_Go_BP.csv	GO:0050708	GO:0050708	regulation of protein secretion	450	-0.525992	-1.15129	0.002997	0.0595489	0.0522375	4496	tags=34%, list=24%, signal=26%	64135/27063/5600/8447/373509/5734/5071/23568/80725/55366/3717/26253/5027/2696/79679/3558/3767/640/81793/846/112744/1803/5991/7100/353514/55612/23586/945/3747/186/7133/27159/2213/2645/59082/6346/284297/1401/2266/1946/4760/222546/5005/834/9066/959/440068/7850/2693/4345/23086/111/776/7124/1956/5950/29126/57393/1268/338322/958/2822/8938/10874/4988/9619/2625/384/51311/1149/84830/6616/7040/9515/55107/3…
125	group_GSEA_Go_BP.csv	GO:0001101	GO:0001101	response to acid chemical	337	-0.526169	-1.14981	0.002997	0.0595489	0.0522375	4365	tags=32%, list=23%, signal=25%	5734/346673/7422/7478/3383/5244/2696/652968/472/56034/8324/429/6319/7481/5979/5727/552/1051/5076/83667/80781/57795/5468/7483/1646/590/6935/440/5020/9370/4656/6662/6506/2350/3673/5031/7124/6096/1291/143686/1956/5950/5444/3294/158376/8644/1645/6750/2731/6899/7484/222545/2706/5030/441509/654/5156/7475/1290/3199/5166/7292/81029/6422/9971/9536/7350/8001/53335/2695/5743/2902/2707/11211/130497/4916/8128…
126	group_GSEA_Go_BP.csv	GO:0044706	GO:0044706	multi-multicellular organism process	218	-0.526262	-1.14258	0.032967	0.24444	0.214428	5499	tags=40%, list=29%, signal=29%	10916/10135/7076/3485/3965/5744/7216/151/84868/54407/116/7026/952/6862/150921/1594/2056/5021/340784/3678/5676/2099/5671/3248/5270/2192/5997/10699/6406/5678/8528/5241/552/5023/7349/8997/5020/2693/3673/49/1268/100506013/53405/4184/367/63978/7040/2706/10266/6696/5673/5125/5618/1828/5617/397/3488/2695/5743/5669/1394/10991/730249/5740/4318/5675/2697/29842/1906/183/285/639/1392/1833/7056/6013/6781/5670…
127	group_GSEA_Go_BP.csv	GO:0098662	GO:0098662	inorganic cation transmembrane transport	720	-0.526478	-1.154	0.001998	0.0457645	0.0401455	3985	tags=30%, list=21%, signal=24%	27094/84679/610/7779/285335/84701/140803/152519/288/80036/10568/6328/3747/79054/859/774/1339/3746/6543/3744/9424/9132/55630/799/84419/88/2257/10345/11141/2247/57468/3786/57348/60598/79400/6331/2273/5349/388591/8913/3762/6261/1234/3754/1346/3764/7351/5031/64078/496/776/53822/27092/11280/342667/126306/57520/79815/255738/57338/728215/8911/348980/6340/3775/4988/6326/27133/348938/3249/3738/6616/3787/5…
128	group_GSEA_Go_BP.csv	GO:0050807	GO:0050807	regulation of synapse organization	213	-0.526515	-1.14235	0.031968	0.240351	0.210841	4579	tags=35%, list=24%, signal=27%	5649/5021/57408/23768/22859/6585/83992/145581/347731/9912/26052/51804/23769/80725/2043/576/2895/3587/2213/26045/94030/11141/1946/8997/1942/1141/5020/27286/575/2693/2049/158038/7124/23284/8536/79012/1607/627/8292/387804/147381/9746/4761/54674/5063/2045/23237/816/2048/2596/7476/2902/1813/84189/4916/11202/25791/4897/64084/57497/4593/5100/40/7097/114798/22865/26280/4776/4914/2904/441381/9378/79953/57…
129	group_GSEA_Go_BP.csv	GO:0061458	GO:0061458	reproductive system development	429	-0.526562	-1.15222	0.001998	0.0457645	0.0401455	5364	tags=38%, list=29%, signal=28%	10272/58495/5926/3586/1761/10370/30812/2624/3856/8531/84159/7784/79805/116/2296/7026/497189/7022/638/23414/8022/150921/6736/1594/268/652/3157/6469/3623/5104/2099/6716/51742/4257/546/91181/122042/247/1396/23626/5654/22846/51804/7422/55366/1045/2492/3383/5270/7482/472/8204/9510/10388/9420/6586/5241/728395/5727/151449/3205/1051/558/7080/8743/2255/2620/2709/5468/56956/768239/5324/4846/8626/2693/6662/…
130	group_GSEA_Go_BP.csv	GO:0070371	GO:0070371	ERK1 and ERK2 cascade	293	-0.527084	-1.14919	0.00899101	0.12375	0.108556	3575	tags=28%, list=19%, signal=23%	799/6359/81848/2066/2247/6346/2255/1880/2266/5801/55885/6357/148/9370/389658/6662/1950/5031/1116/8600/7124/2626/6364/1956/50507/6504/6754/2321/100506013/4988/388121/3356/7066/7040/54550/5156/6360/8074/6355/2045/6369/4889/2048/650/5320/1813/6352/152007/6354/26291/5322/6356/338557/54209/168667/6348/5155/64127/183/7010/2641/920/2263/5314/6850/57007/26191/2633/5159/284/6347/3357/2150/4914/10268/2358/…
131	group_GSEA_Go_BP.csv	GO:0050911	GO:0050911	detection of chemical stimulus involved in sensory perception of smell	377	-0.52744	-1.15364	0.000999001	0.0293189	0.0257191	4743	tags=31%, list=25%, signal=24%	26689/79549/8392/388761/121275/283162/442186/120796/26493/390081/138883/219431/391195/391189/219956/286365/81466/219453/127623/401994/26476/441608/26735/390648/81392/196335/343170/138882/390037/127069/128371/391194/283160/347468/283297/346517/392138/341276/219858/119679/392391/81470/389090/79339/143503/390054/442197/340980/390154/390157/390084/26595/120775/26248/390063/4992/8388/282775/390445/441…
132	group_GSEA_Go_BP.csv	GO:0050808	GO:0050808	synapse organization	402	-0.527441	-1.15439	0.001998	0.0457645	0.0401455	4619	tags=34%, list=25%, signal=26%	56126/6712/5364/22859/6585/83992/145581/347731/55619/9912/26052/23114/9863/51804/23769/80725/440279/8829/2043/10882/1524/63827/576/6623/11346/288/2895/116442/27445/56123/56132/3587/221935/2213/26045/56122/94030/2066/11141/266743/6853/1946/2561/8997/5098/1942/1141/5020/27286/575/2693/2049/6900/1821/158038/7124/56097/9379/119/56125/10397/23284/8536/79012/1607/56098/26059/627/55906/8292/2555/6620/57…
133	group_GSEA_Go_BP.csv	GO:0043207	GO:0043207	response to external biotic stimulus	905	-0.527757	-1.15851	0.000999001	0.0293189	0.0257191	4896	tags=34%, list=26%, signal=27%	129530/151636/57088/1594/820/2056/2277/9466/2719/10379/3441/5319/387695/245938/389643/2268/27250/4353/6036/22806/4257/55509/7456/5788/11238/64581/941/3001/64135/3248/27063/5600/57115/5654/57162/3444/254827/5734/51191/55765/389852/3437/3929/54658/3717/2537/1191/245911/3383/55026/245930/26253/5027/8029/79679/1524/8564/3656/84871/7001/6406/566/7100/83666/2635/1672/23586/330/114132/4939/100423062/358…
134	group_GSEA_Go_BP.csv	GO:0048608	GO:0048608	reproductive structure development	426	-0.527787	-1.15473	0.002997	0.0595489	0.0522375	5364	tags=39%, list=29%, signal=28%	10272/58495/5926/3586/1761/10370/30812/2624/3856/8531/84159/7784/79805/116/2296/7026/497189/7022/638/23414/8022/150921/6736/1594/268/652/3157/6469/3623/5104/2099/6716/51742/4257/546/91181/122042/247/1396/23626/5654/22846/51804/7422/55366/1045/2492/3383/5270/7482/472/8204/9510/10388/9420/6586/5241/728395/5727/151449/3205/1051/558/7080/8743/2255/2620/2709/5468/56956/768239/5324/4846/8626/2693/6662/…
135	group_GSEA_Go_BP.csv	GO:0051272	GO:0051272	positive regulation of cellular component movement	521	-0.528312	-1.15747	0.000999001	0.0293189	0.0257191	4642	tags=33%, list=25%, signal=26%	9732/5154/9181/5788/2886/53905/64581/4921/6546/54437/1902/146206/2303/57118/10500/5629/7422/64115/3929/3717/8829/3383/1907/472/56034/2294/285966/9510/25960/1672/79846/7481/5979/80139/56920/1235/405753/2247/6346/3690/54566/2255/83483/80781/51378/2152/4638/3071/4846/27286/388591/131578/6662/1950/3673/5031/7124/390664/6364/3082/7130/2039/1956/50507/29126/9982/4133/2252/2321/100506013/958/3576/2822/1…
136	group_GSEA_Go_BP.csv	GO:0051707	GO:0051707	response to other organism	903	-0.52857	-1.16031	0.000999001	0.0293189	0.0257191	4896	tags=35%, list=26%, signal=27%	129530/151636/57088/1594/820/2056/2277/9466/2719/10379/3441/5319/387695/245938/389643/2268/27250/4353/6036/22806/4257/55509/7456/5788/11238/64581/941/3001/64135/3248/27063/5600/57115/5654/57162/3444/254827/5734/51191/55765/389852/3437/3929/54658/3717/2537/1191/245911/3383/55026/245930/26253/5027/8029/79679/1524/8564/3656/84871/7001/6406/566/7100/83666/2635/1672/23586/330/114132/4939/100423062/358…
137	group_GSEA_Go_BP.csv	GO:0002791	GO:0002791	regulation of peptide secretion	477	-0.528588	-1.1567	0.001998	0.0457645	0.0401455	4496	tags=34%, list=24%, signal=26%	64135/27063/5600/8447/373509/5734/5071/23568/80725/55366/8862/3717/26253/5027/2696/79679/3558/3767/640/81793/846/112744/1803/91608/5991/7100/353514/55612/23586/945/3747/186/7133/27159/2213/2645/59082/6346/284297/1401/7349/2266/1946/8997/4760/222546/5005/834/9066/959/440068/7850/2693/4345/23086/111/776/8600/7124/1956/5950/29126/57393/1268/338322/958/2822/8938/10874/4988/9619/2625/384/51311/1149/84…
138	group_GSEA_Go_BP.csv	GO:0003007	GO:0003007	heart morphogenesis	249	-0.528621	-1.14999	0.017982	0.175973	0.154367	5187	tags=37%, list=28%, signal=27%	4193/4208/54806/2296/4194/3611/6862/23414/652/6469/9464/23768/27250/7135/26160/6604/27063/65009/2303/8701/1280/5629/7422/10848/8829/2294/161882/9510/6586/7481/859/5727/127294/9172/7139/1942/344022/4846/388591/4634/6261/6662/2626/23462/5950/54567/10512/4607/9645/2625/6899/7040/4887/28514/54345/129446/27302/2138/4889/64321/1301/5318/6262/26508/8642/650/9353/1289/1901/9241/79933/2697/94/7010/7042/65…
139	group_GSEA_Go_BP.csv	GO:2000147	GO:2000147	positive regulation of cell motility	506	-0.528744	-1.1585	0.000999001	0.0293189	0.0257191	4642	tags=33%, list=25%, signal=26%	9732/5154/9181/5788/2886/53905/64581/4921/6546/54437/1902/146206/2303/57118/10500/5629/7422/64115/3929/3717/8829/3383/1907/472/56034/2294/285966/9510/25960/1672/79846/7481/5979/80139/56920/1235/405753/2247/6346/3690/54566/2255/83483/80781/51378/2152/4638/3071/4846/27286/131578/6662/1950/3673/5031/7124/390664/6364/3082/7130/2039/1956/50507/29126/9982/2252/2321/100506013/958/3576/2822/10512/10371/1…
140	group_GSEA_Go_BP.csv	GO:0045926	GO:0045926	negative regulation of growth	237	-0.528881	-1.14969	0.023976	0.207247	0.181801	3755	tags=27%, list=20%, signal=22%	6586/7481/8835/2261/186/859/1029/5727/83667/56920/5468/2273/135644/85407/2786/5950/4133/10512/7161/10371/684/1630/4881/978/7040/92304/3273/8711/6696/27302/3624/3172/6422/2045/153/4499/7490/374946/64321/51316/85004/53335/3488/2487/9353/2660/9241/2697/223117/4493/183/94/7042/4489/5999/7143/6910/51083/4879/4504/6423/9723/344901/623/81501
141	group_GSEA_Go_BP.csv	GO:0030335	GO:0030335	positive regulation of cell migration	484	-0.529172	-1.15836	0.001998	0.0457645	0.0401455	4642	tags=33%, list=25%, signal=26%	9732/5154/9181/5788/2886/64581/4921/6546/54437/1902/146206/2303/57118/10500/5629/7422/64115/3929/3717/8829/3383/1907/472/56034/2294/285966/9510/25960/7481/5979/80139/56920/1235/2247/6346/3690/54566/2255/83483/80781/51378/2152/4638/3071/4846/27286/131578/6662/1950/3673/5031/7124/6364/3082/7130/2039/1956/50507/29126/9982/2252/2321/100506013/958/3576/2822/10512/10371/1991/2625/7040/57091/5156/642273…
142	group_GSEA_Go_BP.csv	GO:0060537	GO:0060537	muscle tissue development	376	-0.52927	-1.15743	0.000999001	0.0293189	0.0257191	4477	tags=32%, list=24%, signal=25%	6546/58/27063/65009/5600/3142/2303/5629/51804/7422/10848/26281/7478/4763/5997/56203/8324/7832/161882/26011/688/51778/186/859/127294/10529/88/9172/2066/7139/2247/10791/4638/93986/51676/148/8048/4656/4634/6261/6662/642658/4868/2626/9242/50507/341405/5950/54567/10512/4607/7161/6899/93649/7040/844/28514/5156/129446/26471/27302/9750/2138/1634/221662/9472/7490/64321/1301/5318/3488/668/6262/5081/26508/6…
143	group_GSEA_Go_BP.csv	GO:0030855	GO:0030855	epithelial cell differentiation	753	-0.52973	-1.16121	0.000999001	0.0293189	0.0257191	4285	tags=41%, list=23%, signal=33%	30812/5754/5138/3859/353145/10628/440021/3856/1969/3850/5106/4208/54806/25932/10626/319101/64102/3458/2296/2260/7026/85293/81872/79955/353140/54474/1825/23135/1594/54206/7379/652/284827/85291/1041/1750/3857/50604/2099/51742/728299/3215/546/91181/247/79983/3868/126695/2303/3886/6701/9863/5629/7422/1045/3855/3872/8829/1365/2194/653240/3383/81871/8689/43849/643418/646817/6876/57835/125981/2294/8324/…
144	group_GSEA_Go_BP.csv	GO:0010876	GO:0010876	lipid localization	368	-0.529797	-1.15835	0.000999001	0.0293189	0.0257191	3556	tags=28%, list=19%, signal=23%	51761/10079/5205/154664/28234/3690/653509/1401/1071/7349/57540/57194/5468/83850/4547/9066/6579/5020/9370/338821/5360/1950/8600/7124/6653/2172/4018/5950/10349/23762/5444/6754/255738/26154/80831/9619/1645/388121/1149/84647/28965/654/4923/6696/114571/8529/201780/79895/3624/8542/3933/3569/11001/9971/335/5443/2587/10599/80763/5320/80833/1813/341/1394/24/255189/345274/5322/1636/26279/8714/6578/4843/344…
145	group_GSEA_Go_BP.csv	GO:0071396	GO:0071396	cellular response to lipid	591	-0.530133	-1.16118	0.001998	0.0457645	0.0401455	4263	tags=30%, list=23%, signal=24%	3929/54658/3717/2104/1191/3383/196/5244/1524/472/8564/8204/3656/8324/846/167465/632/7001/4246/7041/9420/687/7481/5241/5979/80139/186/85315/7133/5727/1051/558/5076/27179/266743/3557/6752/1946/57795/5468/7483/1646/353376/55885/27178/834/3055/4846/22914/440068/6374/4656/2494/2242/8626/129607/2693/56300/6662/1234/10002/111/3673/5031/7124/6096/2672/1956/29126/5251/6754/3576/2822/8644/6097/84830/84639/…
146	group_GSEA_Go_BP.csv	GO:0040017	GO:0040017	positive regulation of locomotion	536	-0.53045	-1.1625	0.000999001	0.0293189	0.0257191	4642	tags=33%, list=25%, signal=25%	9732/5154/9181/5788/2886/53905/64581/4921/6546/9048/54437/1902/146206/2303/57118/10500/5629/7422/64115/3929/3717/8829/3383/1907/472/56034/2294/846/566/285966/9510/25960/1672/79846/7481/5979/80139/56920/1235/405753/2247/6346/3690/54566/2255/83483/80781/51378/2152/4638/3071/4846/27286/131578/6662/1950/3673/5031/7124/390664/6364/3082/7130/2039/1956/50507/29126/7857/9982/2252/2321/100506013/958/3576/…
147	group_GSEA_Go_BP.csv	GO:0007389	GO:0007389	pattern specification process	444	-0.530851	-1.16192	0.000999001	0.0293189	0.0257191	5168	tags=38%, list=28%, signal=28%	92749/4208/54806/4909/25806/2296/2260/7026/497189/84976/6862/3214/1959/8022/5649/92129/652/1746/3213/6469/2719/9464/80055/115948/3215/26160/6604/65009/2303/9096/8701/10297/1045/7478/8829/27019/7482/54626/472/118856/2294/7832/579/5991/389549/429/3216/10655/80173/2114/57822/340260/5727/3205/55079/5076/1767/390992/2066/5080/7080/64399/2255/3224/10220/3227/4760/6935/344022/388591/163589/57619/8626/42…
148	group_GSEA_Go_BP.csv	GO:0099504	GO:0099504	synaptic vesicle cycle	190	-0.5309	-1.14938	0.02997	0.233882	0.205166	3418	tags=31%, list=18%, signal=26%	6517/8447/26052/9863/440279/5027/6854/6855/27445/5023/321/6853/1141/9066/148/91683/776/6861/112476/140679/26059/1268/9162/6620/1137/6616/3356/339302/9515/8618/5865/5582/5030/815/57030/143425/112755/246213/6857/9892/8973/5874/7476/1759/1813/1812/6570/9699/1129/23025/57084/3351/5579/9900/11069/9378/57502/79953/22999
149	group_GSEA_Go_BP.csv	GO:0007608	GO:0007608	sensory perception of smell	404	-0.531059	-1.16242	0.000999001	0.0293189	0.0257191	4743	tags=32%, list=25%, signal=25%	26689/79549/8392/388761/121275/283162/442186/120796/26493/390081/138883/219431/391195/391189/219956/286365/81466/219453/127623/401994/26476/441608/26735/5141/390648/81392/196335/343170/138882/79846/54831/390037/127069/128371/391194/283160/347468/341359/283297/346517/392138/341276/219858/119679/392391/81470/389090/79339/143503/390054/442197/127534/340980/390154/390157/390084/26595/2774/120775/2624…
150	group_GSEA_Go_BP.csv	GO:0042692	GO:0042692	muscle cell differentiation	340	-0.53109	-1.16065	0.001998	0.0457645	0.0401455	4486	tags=31%, list=24%, signal=24%	6604/6546/58/27063/5600/4773/442721/5629/51804/7422/7478/84665/341676/5997/56203/2294/8324/6300/688/51778/493829/4621/348093/186/859/552/127294/10529/88/9172/7139/2255/6935/148/8048/4656/575/93166/6261/6662/963/4868/2626/8536/23462/50507/627/79652/4607/3481/7111/6899/93649/168620/7040/92304/844/10266/28514/5156/27302/9750/1311/221662/51725/9472/7490/3488/650/389827/4283/3792/8740/10290/4892/12485…
151	group_GSEA_Go_BP.csv	GO:0015711	GO:0015711	organic anion transport	472	-0.531113	-1.16198	0.000999001	0.0293189	0.0257191	4156	tags=32%, list=22%, signal=25%	5244/4763/5027/3766/113235/5997/57835/151473/8564/846/6519/89874/348932/768/186/552/6005/51761/6538/10079/6505/5205/28234/6540/1071/9058/57194/5468/65012/83884/54716/4547/6579/5020/64849/338821/6506/83546/2350/5360/81796/133482/885/347411/8600/388662/140679/6754/59272/157724/26154/9619/23428/1645/388121/9121/6616/56301/284111/146167/761/84647/28965/4923/114571/2352/8529/201780/84889/79895/80131/7…
152	group_GSEA_Go_BP.csv	GO:2000377	GO:2000377	regulation of reactive oxygen species metabolic process	176	-0.531152	-1.14814	0.03996	0.26573	0.233104	4314	tags=30%, list=23%, signal=23%	5071/3717/1191/3383/1524/7001/440503/186/57126/5076/405753/1401/22914/575/225/7124/1956/50507/59272/8644/384/7498/7040/90527/5880/7350/683/5446/64902/5743/2902/730249/11035/5740/4314/185/1906/5155/183/655/445/6850/5159/5806/2150/3240/124056/2358/100528032/4504/948/3553
153	group_GSEA_Go_BP.csv	GO:0071229	GO:0071229	cellular response to acid chemical	206	-0.531218	-1.15256	0.01998	0.184642	0.161972	4365	tags=34%, list=23%, signal=26%	5734/346673/7422/5244/652968/472/56034/8324/7481/5979/552/1051/5076/83667/57795/5468/7483/1646/6935/4656/6662/2350/5031/7124/6096/1291/143686/1956/158376/8644/1645/6899/7484/5030/5156/7475/1290/3199/5166/7292/81029/6422/9971/7350/53335/2707/11211/130497/4916/81285/7477/5732/1906/5155/4058/445/2263/2865/5915/358/1277/339479/1620/4023/4776/5105/1281/5737/1278/7494
154	group_GSEA_Go_BP.csv	GO:0098655	GO:0098655	cation transmembrane transport	822	-0.531293	-1.16537	0.000999001	0.0293189	0.0257191	4076	tags=31%, list=22%, signal=25%	1145/113235/5997/3767/440699/27094/84679/610/7779/285335/84701/140803/152519/288/80036/10568/6583/6328/3747/79054/859/774/1339/3746/6543/6005/3744/9424/9132/55630/799/84419/5023/88/2257/6505/10345/11141/2247/57468/3786/57348/57127/60598/79400/6331/83884/2273/54716/5349/388591/8913/3762/6261/1234/3754/1346/3764/7351/5031/64078/496/776/53822/27092/11280/85413/342667/126306/57520/79815/255738/57338/…
155	group_GSEA_Go_BP.csv	GO:0072593	GO:0072593	reactive oxygen species metabolic process	257	-0.531833	-1.15815	0.010989	0.140748	0.123467	4793	tags=33%, list=26%, signal=25%	10394/10811/4353/6095/55022/4688/53905/64581/10516/5071/55765/3717/2537/1191/3383/5027/1524/7001/3047/440503/186/57126/5076/83667/405753/1401/79400/4846/22914/575/3045/225/7124/137902/1956/50507/59272/8644/384/7498/7040/1544/90527/5166/3046/6649/5880/7350/683/3050/5446/1816/2878/64902/5743/2902/730249/11035/4843/5740/4314/185/1906/5155/183/7173/375387/655/445/4842/6850/5159/7097/5806/337/50508/21…
156	group_GSEA_Go_BP.csv	GO:0033993	GO:0033993	response to lipid	900	-0.532086	-1.16802	0.000999001	0.0293189	0.0257191	4263	tags=31%, list=23%, signal=25%	3929/54658/3717/7478/2104/1191/3383/50616/196/5244/5027/2696/1524/472/3767/8564/8204/3656/8324/10888/846/167465/632/7001/4246/7041/429/6319/9420/768/687/6586/7481/3587/8835/5241/5979/80139/186/85315/7133/5727/552/1051/558/799/5076/27179/266743/2255/3557/7349/4324/6752/1946/57795/5468/7483/1646/590/353376/55885/93986/27178/834/3055/5020/4846/9370/22914/440068/6374/4656/2494/2242/8626/129607/2693/5…
157	group_GSEA_Go_BP.csv	GO:0048568	GO:0048568	embryonic organ development	427	-0.532634	-1.16535	0.000999001	0.0293189	0.0257191	5369	tags=38%, list=29%, signal=28%	10083/58495/2778/3586/10370/3638/5754/2624/3856/1969/4208/54806/79805/25806/2296/2260/7026/497189/79955/115908/6862/3214/23414/133060/652/1746/340784/3213/2304/6469/9464/1750/3198/5154/3215/26160/65009/3142/22846/2303/1280/5629/51804/7422/51168/1045/10848/56034/2294/161882/579/91461/4325/8323/3216/348093/7481/57822/5727/1051/9132/5076/51761/5080/2255/3227/2709/7483/1942/4760/6935/344022/388591/77…
158	group_GSEA_Go_BP.csv	GO:0098660	GO:0098660	inorganic ion transmembrane transport	803	-0.532713	-1.16816	0.000999001	0.0293189	0.0257191	3996	tags=34%, list=21%, signal=28%	157855/26285/287/5788/6507/65266/6546/3748/3759/6769/2565/3750/2563/3784/10142/79689/3769/778/6338/201140/100507027/5027/3766/30061/113235/3767/440699/846/27094/84679/610/2556/7779/2568/285335/84701/140803/152519/288/80036/10568/54831/6328/3747/79054/859/774/1339/3746/6543/3744/9424/9132/55630/799/2559/84419/88/2257/6505/10345/11141/2247/57468/3786/57348/2561/60598/79400/65012/6331/2273/5349/3885…
159	group_GSEA_Go_BP.csv	GO:1903530	GO:1903530	regulation of secretion by cell	725	-0.533131	-1.16875	0.000999001	0.0293189	0.0257191	4321	tags=34%, list=23%, signal=27%	8832/5071/551/23568/80725/55366/8862/3717/26281/4763/26253/5027/8941/2696/79679/30817/6855/3558/3767/640/8564/81793/2294/846/112744/1803/7779/91608/5991/6623/7100/27445/353514/55612/23586/945/3747/186/7133/27159/552/2213/2645/57126/5023/11141/59082/321/1143/6346/284297/1401/6853/7349/2266/1946/8997/4760/222546/1141/341359/5005/25837/834/9066/959/5020/148/9370/440068/8913/2242/7850/2693/4345/91683…
160	group_GSEA_Go_BP.csv	GO:1901568	GO:1901568	fatty acid derivative metabolic process	156	-0.533377	-1.15212	0.045954	0.283877	0.249023	4793	tags=36%, list=26%, signal=27%	10394/5319/1579/247/3248/728226/551/6916/246/2194/91227/92086/1907/1555/747/6319/10464/552/2166/5730/1646/23305/4051/23205/5444/66002/8644/158835/158584/1544/8529/126410/59344/9536/11283/29785/158833/5446/1559/5743/54511/51703/255189/5322/5740/1906/123876/50487/2687/6850/54898/1558/7097/5742/3553/79611
161	group_GSEA_Go_BP.csv	GO:0098656	GO:0098656	anion transmembrane transport	283	-0.533447	-1.16279	0.00599401	0.0941182	0.0825623	4066	tags=31%, list=22%, signal=25%	113235/5997/57835/846/6519/84679/2556/2568/285335/285966/348932/54831/2559/6505/57468/57348/2561/65012/83884/54716/5349/64849/6506/2350/2570/347411/140679/157724/53405/2555/23428/7809/56301/284111/146167/55107/55879/441509/4923/114571/266675/84889/1188/80131/57030/8542/6550/246213/387700/6539/115111/9022/9635/25769/8001/57101/284525/11095/1187/10630/130497/54102/10991/6557/9356/5172/6534/1193/653…
162	group_GSEA_Go_BP.csv	GO:0051046	GO:0051046	regulation of secretion	782	-0.533467	-1.16989	0.000999001	0.0293189	0.0257191	4506	tags=35%, list=24%, signal=28%	11314/64135/65266/27063/5600/8447/373509/3784/5734/8832/5071/551/23568/80725/55366/8862/3717/26281/4763/26253/5027/8941/2696/79679/30817/6855/3558/3767/640/8564/81793/2294/846/112744/10699/1803/7779/91608/5991/6623/7100/27445/353514/55612/23586/4939/945/3747/186/7133/27159/552/2213/2645/57126/5023/11141/59082/321/1143/6346/2255/284297/1401/6853/7349/2266/1946/8997/4760/222546/1141/341359/5005/258…
163	group_GSEA_Go_BP.csv	GO:0050731	GO:0050731	positive regulation of peptidyl-tyrosine phosphorylation	188	-0.53391	-1.1553	0.022977	0.202702	0.177814	4867	tags=41%, list=26%, signal=31%	2056/5649/3678/50604/9181/5788/941/54625/2209/3572/23568/7422/80725/3717/8829/3383/2043/3558/353514/83666/10464/2261/2066/3690/2255/1946/1942/51378/148/9370/389658/2688/1950/885/7124/3082/374/50507/627/2252/958/3481/1443/3606/3356/7040/654/57091/100133941/7039/5008/1464/3059/3569/255324/5175/1437/6352/1489/1636/149233/54209/133396/5155/183/150/84632/3589/920/6850/8784/2069/284/8995/26585/948/1440
164	group_GSEA_Go_BP.csv	GO:0050768	GO:0050768	negative regulation of neurogenesis	284	-0.533921	-1.16343	0.00599401	0.0941182	0.0825623	3581	tags=26%, list=19%, signal=21%	55079/56920/2066/5080/10220/57540/1942/1735/6662/6900/7124/6653/5087/430/2672/23462/4133/10512/340533/1949/7161/10371/1630/57801/6496/6658/7040/7068/28514/1840/6696/7224/3199/5458/112755/3569/2045/3196/79727/374946/4168/2048/84894/53335/7476/9353/10718/4916/4821/11202/25791/6356/9241/223117/655/63923/4854/7143/7101/1620/7225/4776/54328/4504/9723/1281/7070/3553/344901/146760/10660/5764/6664/6663
165	group_GSEA_Go_BP.csv	GO:0072511	GO:0072511	divalent inorganic cation transport	472	-0.534988	-1.17045	0.000999001	0.0293189	0.0257191	3700	tags=29%, list=20%, signal=24%	945/79054/859/774/6543/2645/55630/799/5023/10345/11141/2247/7349/10316/1141/4638/4846/148/8913/1447/6947/6261/1234/10267/1950/5031/776/27092/342667/126306/79815/57338/728215/8911/4988/1137/348938/2916/785/168620/2701/3356/7040/844/10266/5957/9001/187/4923/64805/7224/7781/57214/815/5330/6355/55799/117531/9472/378807/10203/25769/8989/7223/816/56302/6262/5743/4283/286097/2902/1813/773/6352/1812/2709…
166	group_GSEA_Go_BP.csv	GO:0043583	GO:0043583	ear development	218	-0.534995	-1.16154	0.016983	0.175146	0.153641	5274	tags=42%, list=28%, signal=31%	3638/5754/2624/54806/2260/497189/79955/115908/8022/133060/652/340784/6469/1750/3198/8825/1052/6657/3784/1280/5629/51804/51168/26281/793/2043/579/8323/341640/57822/9132/5076/51761/5205/2255/2561/4760/6935/54360/6662/26018/84059/2736/3714/5456/140469/2625/3249/6899/8549/7040/2706/1050/28514/3199/9750/246213/2103/2138/5816/117531/65217/3777/1301/2048/8642/650/2487/84189/130497/4916/9547/131149/9241/…
167	group_GSEA_Go_BP.csv	GO:0070372	GO:0070372	regulation of ERK1 and ERK2 cascade	276	-0.535	-1.16665	0.004995	0.0837585	0.0734746	3575	tags=29%, list=19%, signal=24%	799/6359/81848/2066/2247/6346/2255/1880/2266/5801/55885/6357/148/9370/389658/5031/1116/8600/7124/2626/6364/1956/50507/6504/6754/2321/100506013/4988/388121/3356/7066/7040/54550/5156/6360/8074/6355/2045/6369/4889/2048/650/5320/1813/6352/152007/6354/26291/5322/6356/338557/54209/168667/6348/5155/64127/7010/2641/920/2263/5314/6850/57007/26191/2633/5159/284/6347/3357/2150/4914/10268/2358/4504/948/10344…
168	group_GSEA_Go_BP.csv	GO:0051047	GO:0051047	positive regulation of secretion	419	-0.535175	-1.17107	0.000999001	0.0293189	0.0257191	4146	tags=32%, list=22%, signal=26%	26253/5027/8941/2696/79679/3558/640/8564/846/112744/91608/353514/55612/23586/945/186/27159/552/2645/57126/6346/7349/2266/222546/1141/341359/5005/834/9066/5020/8913/23086/885/776/8600/7124/1956/5950/29126/57393/6754/1268/338322/8911/2822/8938/10874/9619/2625/51311/4881/7040/8618/85477/55107/3745/4887/654/4923/6696/9447/8529/6288/3624/22861/5008/7292/143425/112755/2691/3569/9971/43/2850/7424/5617/6…
169	group_GSEA_Go_BP.csv	GO:0090596	GO:0090596	sensory organ morphogenesis	255	-0.53543	-1.1658	0.00699301	0.103924	0.0911642	5274	tags=41%, list=28%, signal=30%	3638/30812/5754/2624/1969/4915/256297/54806/25806/2260/497189/79955/115908/133060/652/340784/1750/197021/3198/10210/1280/5629/51804/7422/51168/793/4763/7482/579/8323/57822/221935/9132/5076/51761/5080/2255/10220/7483/6935/1419/2201/2792/1735/6662/10002/85407/26018/6096/2736/5950/5456/140469/348980/2625/3249/6899/6496/6656/7068/28514/2202/1290/3199/9750/1296/118427/2138/2780/1301/2048/668/2487/1289…
170	group_GSEA_Go_BP.csv	GO:0070838	GO:0070838	divalent metal ion transport	467	-0.535588	-1.17204	0.000999001	0.0293189	0.0257191	3700	tags=30%, list=20%, signal=25%	6406/7779/140803/152519/353514/80036/945/79054/859/774/6543/2645/55630/799/5023/10345/11141/2247/7349/10316/1141/4638/4846/148/8913/1447/6261/1234/10267/1950/5031/776/27092/342667/126306/79815/57338/728215/8911/4988/1137/348938/2916/785/168620/2701/3356/7040/844/10266/5957/9001/187/4923/64805/7224/7781/57214/815/5330/6355/55799/117531/9472/378807/10203/25769/8989/7223/816/56302/6262/5743/4283/286…
171	group_GSEA_Go_BP.csv	GO:0050803	GO:0050803	regulation of synapse structure or activity	222	-0.53563	-1.16309	0.015984	0.169482	0.148673	4579	tags=34%, list=24%, signal=26%	22859/6585/83992/145581/347731/9912/26052/51804/23769/80725/2043/576/2895/3587/2213/26045/94030/11141/1946/8997/1942/1141/5020/27286/575/2693/2049/158038/7124/23284/8536/79012/1607/627/8292/387804/147381/9746/4761/54674/57030/5063/112755/246213/2045/23237/816/2048/2596/7476/1759/2902/1813/84189/4916/11202/25791/4897/64084/57497/4593/5100/40/7097/114798/57084/22865/26280/4776/4914/2904/441381/9378…
172	group_GSEA_Go_BP.csv	GO:1903532	GO:1903532	positive regulation of secretion by cell	390	-0.535659	-1.17191	0.000999001	0.0293189	0.0257191	4496	tags=35%, list=24%, signal=27%	64135/27063/5600/8447/373509/5734/551/8862/3717/26253/5027/8941/2696/79679/3558/640/8564/846/112744/91608/353514/55612/23586/945/186/27159/552/2645/57126/6346/7349/2266/222546/1141/341359/5005/834/9066/5020/8913/23086/885/776/8600/7124/1956/5950/29126/57393/1268/338322/8911/2822/8938/10874/9619/2625/51311/7040/8618/55107/3745/4887/654/4923/6696/9447/6288/3624/22861/5008/7292/143425/112755/2691/35…
173	group_GSEA_Go_BP.csv	GO:0048592	GO:0048592	eye morphogenesis	148	-0.536263	-1.15688	0.043956	0.27652	0.242569	3694	tags=34%, list=20%, signal=27%	5629/7422/793/4763/7482/221935/5076/51761/5080/10220/7483/6935/1419/2201/2792/1735/6662/10002/85407/6096/5950/348980/6496/6656/7068/28514/2202/1290/1296/118427/2780/2048/668/1289/2200/639/1826/655/54549/23418/6121/30813/5915/3975/1295/64220/7021/7070/5764/6664
174	group_GSEA_Go_BP.csv	GO:1903531	GO:1903531	negative regulation of secretion by cell	197	-0.536373	-1.16224	0.013986	0.15837	0.138926	5471	tags=44%, list=29%, signal=31%	9607/7114/23208/3965/55691/3586/5552/29091/151/26056/114088/255057/7128/2335/9466/3623/4828/64111/11314/5734/8832/5071/80725/55366/4763/3767/2294/7779/353514/186/7133/2213/11141/59082/284297/7349/8997/9370/440068/7850/2693/4345/7124/1268/4988/384/51311/1149/84830/9515/3745/64805/8074/3624/5008/6422/9971/335/90865/4889/152138/7200/114769/729230/7293/1813/1394/7447/91543/18/2917/338557/3625/1906/15…
175	group_GSEA_Go_BP.csv	GO:0009306	GO:0009306	protein secretion	568	-0.536406	-1.17513	0.000999001	0.0293189	0.0257191	4146	tags=31%, list=22%, signal=25%	26253/5027/2696/79679/3558/3767/640/81793/846/112744/1803/5991/6623/7100/27445/353514/55612/23586/201158/945/3747/186/7133/27159/2213/2645/115362/59082/6346/284297/3557/1401/2266/1946/79400/4760/4053/222546/5005/834/4547/9066/959/3694/440068/7850/2693/4345/23086/111/1116/776/7124/9636/2039/1956/5950/29126/7857/57393/1268/338322/958/2822/8938/10874/4988/9619/389692/2625/384/51311/1149/84830/6616/5…
176	group_GSEA_Go_BP.csv	GO:0071466	GO:0071466	cellular response to xenobiotic stimulus	175	-0.536663	-1.1601	0.025974	0.216015	0.189492	2532	tags=25%, list=14%, signal=22%	6261/26227/1956/4988/6097/91703/1645/54575/7040/2706/13/1544/57412/3172/6817/29785/5446/54577/64757/6262/1559/348158/2947/2902/10/2660/2944/570/196541/2946/5155/445/54576/2327/779/1392/1558/358/2940/114/2326/5105/5742/2328
177	group_GSEA_Go_BP.csv	GO:0051606	GO:0051606	detection of stimulus	636	-0.536929	-1.17629	0.000999001	0.0293189	0.0257191	4743	tags=34%, list=25%, signal=27%	26689/2979/79549/8392/388761/121275/283162/442186/120796/26493/64581/390081/138883/219431/58473/54437/57115/391195/563/391189/219956/778/286365/81466/3929/219453/127623/50839/401994/5270/5158/26476/259296/259293/441608/26735/2294/2978/846/27094/390648/81392/196335/343170/80036/138882/346562/79054/285093/859/2645/259290/51761/390037/127069/128371/284297/23746/391194/283160/347468/259285/283297/132…
178	group_GSEA_Go_BP.csv	GO:0048762	GO:0048762	mesenchymal cell differentiation	211	-0.537071	-1.16519	0.011988	0.146842	0.128813	5921	tags=43%, list=32%, signal=30%	7474/57715/4487/145258/6591/28984/4192/23187/283149/2668/10736/10252/64218/9037/84541/58495/4017/30812/4208/2296/2260/2335/652/6469/9464/147906/27250/54437/2303/265/10500/7478/8829/80709/7041/84695/7481/5979/80139/5076/56920/2066/7080/2255/3911/1942/90102/114990/6662/202151/8091/3082/23462/1909/10512/10371/3249/6899/7040/3569/6422/6317/26508/650/2487/80326/10630/152007/130497/9241/223117/1906/704…
179	group_GSEA_Go_BP.csv	GO:0048839	GO:0048839	inner ear development	191	-0.537154	-1.16299	0.018981	0.180734	0.158544	5274	tags=44%, list=28%, signal=32%	3638/5754/2624/54806/2260/497189/79955/115908/8022/133060/652/340784/6469/1750/3198/8825/1052/6657/3784/1280/5629/51804/51168/26281/793/2043/8323/341640/57822/9132/5076/51761/5205/2255/2561/4760/6935/54360/6662/26018/84059/2736/3714/5456/140469/2625/3249/6899/8549/7040/2706/1050/28514/9750/246213/2103/2138/5816/117531/65217/3777/1301/2048/8642/650/2487/84189/4916/9547/131149/168667/10804/5396/740…
180	group_GSEA_Go_BP.csv	GO:0007600	GO:0007600	sensory perception	915	-0.53747	-1.17991	0.000999001	0.0293189	0.0257191	4743	tags=36%, list=25%, signal=28%	26689/2979/2911/197021/3198/79549/1413/8392/388761/3375/121275/283162/442186/9478/120796/26493/6507/390081/138883/219431/54437/391195/563/391189/3784/84530/219956/778/286365/155051/1280/6338/81466/51168/5961/219453/127623/50839/3383/401994/54714/5270/5027/3766/5158/26476/11272/5959/259296/259293/441608/26735/2978/6017/5141/11081/390648/81392/196335/343170/80036/57731/138882/346562/79846/54831/117…
181	group_GSEA_Go_BP.csv	GO:0007162	GO:0007162	negative regulation of cell adhesion	267	-0.537761	-1.17254	0.002997	0.0595489	0.0522375	4942	tags=39%, list=26%, signal=29%	2267/5592/652/6469/7045/8651/1041/8654/5364/5788/941/11326/11314/5140/3142/57162/7422/64115/3717/6695/5270/4763/80709/79679/3558/2192/124872/8324/7001/3718/27299/84695/1600/80139/1029/2213/5340/1051/3557/53833/2266/1946/90102/9370/394263/4582/3135/2039/1493/29126/30009/5362/340533/384/84830/7040/3273/1840/58494/654/6693/9750/7292/3456/335/397/170692/441478/650/18/5054/26279/284194/5420/94/285/201…
182	group_GSEA_Go_BP.csv	GO:0048562	GO:0048562	embryonic organ morphogenesis	288	-0.538347	-1.1734	0.000999001	0.0293189	0.0257191	5369	tags=40%, list=29%, signal=29%	10083/58495/2778/3638/5754/2624/1969/4208/54806/25806/2260/497189/79955/115908/6862/3214/133060/652/1746/340784/3213/2304/6469/9464/1750/3198/3215/26160/65009/3142/2303/1280/5629/51804/51168/2294/579/4325/8323/3216/348093/7481/57822/9132/5076/51761/5080/2255/3227/7483/1942/4760/6935/344022/388591/2201/6662/26018/2626/2736/5950/5456/140469/9645/2625/3249/6899/7484/6496/3218/60529/28514/5156/54345/…
183	group_GSEA_Go_BP.csv	GO:0070588	GO:0070588	calcium ion transmembrane transport	304	-0.538375	-1.17418	0.001998	0.0457645	0.0401455	3099	tags=26%, list=17%, signal=22%	8913/6261/1234/5031/776/27092/342667/126306/57338/728215/8911/4988/785/168620/3356/7040/844/9001/187/4923/64805/7224/57214/5330/55799/117531/9472/378807/25769/8989/7223/56302/6262/4283/286097/2902/1813/773/1812/27091/1394/2906/140738/1193/196541/2946/477/6236/59284/6348/10369/150/9002/8912/6373/4842/84502/10008/3627/55503/779/59283/3357/5294/7225/59285/6547/10268/2904/775/7070/5350/55584/57419/65…
184	group_GSEA_Go_BP.csv	GO:1990845	GO:1990845	adaptive thermogenesis	153	-0.538489	-1.16298	0.035964	0.253655	0.222511	4386	tags=31%, list=23%, signal=24%	2303/8473/7422/55366/3717/2104/56034/283455/6319/79054/3953/1051/3910/5020/9370/7351/6653/8809/1621/23090/5334/1149/3606/5618/43/153/7350/216/33/51316/155/51087/729230/1734/4858/26291/338557/3934/2697/6850/64641/11096/50486/4160/948/1240/6588
185	group_GSEA_Go_BP.csv	GO:0007565	GO:0007565	female pregnancy	188	-0.538783	-1.16585	0.012987	0.15157	0.13296	2643	tags=22%, list=14%, signal=19%	1268/100506013/53405/367/63978/7040/2706/10266/6696/5673/5125/5618/1828/5617/397/3488/2695/5743/5669/1394/10991/730249/5740/4318/5675/2697/29842/183/285/639/1392/1833/7056/6013/6781/5670/5069/23641/3553/3620/5764/6019
186	group_GSEA_Go_BP.csv	GO:1901654	GO:1901654	response to ketone	193	-0.5388	-1.16642	0.010989	0.140748	0.123467	4365	tags=32%, list=23%, signal=25%	5734/551/3383/196/5244/3767/632/768/687/6586/186/552/266743/1946/5468/1646/93986/5020/2693/111/5031/10481/1956/8644/367/7040/2706/10266/5030/6696/1446/7292/6422/1828/378807/3283/7200/4747/9353/167127/4916/4821/2660/730249/5732/79820/196541/1906/7042/445/3284/1392/7097/358/2155/387758/114/5105/5350/5737/5764/6663
187	group_GSEA_Go_BP.csv	GO:0035295	GO:0035295	tube development	991	-0.538922	-1.18348	0.000999001	0.0293189	0.0257191	4288	tags=31%, list=23%, signal=25%	1280/5629/51804/7422/55366/1045/8862/8829/793/5270/7127/2043/4763/7482/1907/1524/56034/2294/846/112744/1990/579/91461/219699/576/9496/688/25960/429/8323/79812/84695/348093/1600/7481/5241/5979/57822/26051/186/859/1286/5727/3953/151449/5076/390992/5080/7080/64399/2247/3690/2255/10220/2709/80781/5468/3911/1942/3848/79400/51378/2152/83716/6935/57125/4638/344022/93986/887/340419/4846/27286/388591/5761…
188	group_GSEA_Go_BP.csv	GO:0030216	GO:0030216	keratinocyte differentiation	301	-0.539017	-1.17503	0.001998	0.0457645	0.0401455	5246	tags=45%, list=28%, signal=33%	3859/353145/10628/440021/3856/1969/3850/25932/10626/319101/2296/85293/81872/353140/54474/1825/1594/54206/284827/85291/1041/3857/50604/728299/247/3868/126695/3886/6701/3855/3872/653240/81871/8689/43849/643418/125981/100129271/3883/8688/3891/730755/80173/3854/85294/353142/5080/140807/6698/25984/337976/3890/3875/3848/353131/8626/286887/3882/3889/3728/23086/130120/5493/1824/8687/23581/8456/5068/26154…
189	group_GSEA_Go_BP.csv	GO:0050727	GO:0050727	regulation of inflammatory response	369	-0.539193	-1.17893	0.000999001	0.0293189	0.0257191	4718	tags=37%, list=25%, signal=29%	27250/6095/50604/2099/5788/64581/11326/4210/145581/56547/5734/3572/388125/3929/3717/1191/80709/3558/472/9180/81793/2294/112744/27293/353514/330/7133/725/2213/1051/84699/5603/405753/115362/6346/1380/53833/5468/3848/720/3055/9370/55061/7850/6280/84630/2693/225/4345/3673/731/8600/7124/7052/3082/7130/730/717/1956/55527/1268/59272/338322/732/1991/2625/3606/1050/325/4142/1215/26471/90527/53342/6288/228…
190	group_GSEA_Go_BP.csv	GO:0006936	GO:0006936	muscle contraction	345	-0.539262	-1.17842	0.000999001	0.0293189	0.0257191	4768	tags=40%, list=25%, signal=31%	8654/481/4632/7135/30845/9732/287/7169/6546/58/3759/6769/3784/442721/29119/10848/4619/1907/4620/1145/5997/56203/6641/493829/4621/2982/859/127294/51761/5023/88/9172/2257/10345/7139/1143/7349/6752/10316/6331/3672/92241/1141/4638/5020/388591/148/8048/8913/4634/2693/3762/6261/3728/93408/3764/3673/7125/776/2626/342667/1824/126306/1909/2593/4151/59272/10874/4607/10911/7111/384/93649/8082/80852/3356/167…
191	group_GSEA_Go_BP.csv	GO:0034284	GO:0034284	response to monosaccharide	199	-0.53945	-1.16914	0.013986	0.15837	0.138926	3607	tags=25%, list=19%, signal=20%	2645/5076/83667/1946/4760/222546/9370/6518/111/3673/2626/50507/57393/2822/8938/389692/7040/55107/3745/125111/1215/1285/5798/3172/9971/2850/79727/7200/51085/2695/5743/7447/4821/26291/2697/5313/10804/150/285/2641/1392/1292/169026/4023/114/5105/5799/3170/7494
192	group_GSEA_Go_BP.csv	GO:0050907	GO:0050907	detection of chemical stimulus involved in sensory perception	426	-0.539924	-1.18128	0.000999001	0.0293189	0.0257191	4743	tags=34%, list=25%, signal=26%	26689/79549/8392/388761/121275/283162/442186/120796/26493/390081/138883/219431/391195/563/391189/219956/286365/81466/219453/127623/50839/401994/26476/259296/259293/441608/26735/390648/81392/196335/343170/138882/346562/285093/259290/390037/127069/128371/391194/283160/347468/259285/283297/132112/346517/259292/50832/392138/50837/341276/219858/119679/392391/81470/389090/79339/143503/390054/54429/4421…
193	group_GSEA_Go_BP.csv	GO:0001503	GO:0001503	ossification	375	-0.540249	-1.18127	0.000999001	0.0293189	0.0257191	5600	tags=43%, list=30%, signal=31%	10736/56998/56172/649/1021/1836/2185/285313/56975/79412/64096/10272/54/5744/2778/7473/5552/30812/1969/1435/4208/2296/3611/7059/115908/8200/1959/1594/652/6469/2719/4054/9464/2268/5364/1052/4921/6546/162466/6657/2303/265/5734/3572/1280/55366/246/2194/4763/5027/54829/846/632/91461/4325/7481/221044/2261/55790/5727/1051/4322/340419/5020/4656/8626/2201/6261/6662/642658/202151/8600/7124/84059/5087/6096/…
194	group_GSEA_Go_BP.csv	GO:0051146	GO:0051146	striated muscle cell differentiation	267	-0.540264	-1.178	0.002997	0.0595489	0.0522375	4477	tags=32%, list=24%, signal=25%	6546/58/27063/4773/442721/5629/51804/7422/7478/84665/341676/5997/56203/8324/688/51778/493829/4621/186/859/552/127294/10529/88/9172/7139/148/8048/4656/575/6261/963/4868/2626/50507/627/4607/3481/7111/6899/93649/168620/7040/92304/844/28514/5156/27302/9750/1311/221662/9472/7490/3488/650/389827/4283/3792/8740/4892/124857/376132/4015/7345/79933/1906/183/8912/5999/4842/3627/5159/2318/5915/6910/84700/115…
195	group_GSEA_Go_BP.csv	GO:0006869	GO:0006869	lipid transport	333	-0.540292	-1.18075	0.000999001	0.0293189	0.0257191	3556	tags=30%, list=19%, signal=25%	186/5727/51761/10079/5205/154664/28234/3690/653509/1071/7349/57540/57194/5468/83850/4547/9066/6579/5020/9370/338821/5360/1950/8600/6653/2172/4018/5950/10349/23762/5444/6754/255738/26154/80831/9619/1645/388121/84647/28965/654/4923/6696/114571/8529/201780/79895/3624/8542/3933/11001/9971/335/5443/2587/10599/80763/5320/80833/1813/341/1394/24/255189/345274/5322/1636/26279/8714/6578/4843/344/185/391013…
196	group_GSEA_Go_BP.csv	GO:0002064	GO:0002064	epithelial cell development	204	-0.540519	-1.17239	0.012987	0.15157	0.13296	4649	tags=37%, list=25%, signal=28%	2099/51742/546/91181/79983/126695/2303/9863/5629/7422/1365/2194/3383/57835/579/5991/688/80173/5241/26051/1286/5080/80781/54507/1419/9370/57619/8626/6662/631/23086/7124/4868/10481/54768/7111/367/6496/28514/654/59/54345/9750/60484/1903/81029/3172/3642/117531/3274/2828/5175/6768/7476/2947/84189/4821/7477/8419/5420/2697/29842/5155/64919/7401/639/653/91522/5915/2150/6781/4914/3553/168002/6098/7494
197	group_GSEA_Go_BP.csv	GO:0051048	GO:0051048	negative regulation of secretion	223	-0.540633	-1.17427	0.00799201	0.114228	0.100203	5471	tags=44%, list=29%, signal=32%	9607/7114/23208/3965/55691/3586/5552/65267/29091/151/26056/497189/114088/255057/7128/2335/5021/9466/3623/4828/64111/11314/65266/5734/8832/5071/80725/55366/4763/3767/2294/7779/353514/186/7133/2213/11141/59082/284297/7349/8997/5020/9370/440068/7850/1447/2693/4345/1950/7124/1268/10874/4988/384/51311/1149/84830/9515/3745/4887/64805/8529/8074/3624/5008/6422/9971/335/90865/4889/152138/7200/114769/80763…
198	group_GSEA_Go_BP.csv	GO:0007606	GO:0007606	sensory perception of chemical stimulus	474	-0.540674	-1.18305	0.000999001	0.0293189	0.0257191	4743	tags=34%, list=25%, signal=26%	26689/79549/8392/388761/121275/283162/442186/120796/26493/390081/138883/219431/391195/563/391189/219956/286365/6338/81466/219453/127623/50839/401994/26476/259296/259293/441608/26735/5141/390648/81392/196335/343170/138882/346562/79846/54831/285093/259290/390037/127069/128371/391194/283160/347468/259285/341359/283297/132112/346517/259292/50832/392138/50837/341276/219858/119679/392391/81470/389090/7…
199	group_GSEA_Go_BP.csv	GO:0009749	GO:0009749	response to glucose	189	-0.540674	-1.17037	0.00899101	0.12375	0.108556	3607	tags=24%, list=19%, signal=20%	2645/5076/83667/1946/4760/222546/9370/111/2626/50507/57393/2822/8938/389692/7040/55107/3745/125111/1215/1285/5798/3172/9971/2850/79727/7200/51085/2695/7447/4821/26291/2697/5313/10804/150/285/2641/1392/1292/169026/4023/114/5105/5799/3170/7494
200	group_GSEA_Go_BP.csv	GO:0006820	GO:0006820	anion transport	616	-0.540733	-1.18483	0.000999001	0.0293189	0.0257191	4156	tags=33%, list=22%, signal=27%	5244/4763/5027/3766/113235/5997/57835/151473/8564/846/6519/89874/84679/2556/2568/285335/285966/348932/6424/10568/768/54831/7038/186/552/6005/1051/2559/51761/6538/10079/6505/5205/57468/28234/57348/6540/1071/9058/10316/2561/57194/5468/65012/83884/54716/4547/6579/5020/5349/64849/338821/6506/83546/2350/5360/81796/133482/5031/2570/885/347411/8600/388662/140679/6754/59272/157724/26154/53405/2555/9619/2…
201	group_GSEA_Go_BP.csv	GO:0055082	GO:0055082	cellular chemical homeostasis	790	-0.540844	-1.18619	0.000999001	0.0293189	0.0257191	4253	tags=31%, list=23%, signal=25%	492/3717/201140/3383/1356/793/53940/5027/5158/2696/30061/1907/344905/1524/3558/113235/3767/57835/846/84679/7779/285335/11346/2841/10568/79054/186/859/6543/552/6005/2645/55630/799/5076/6359/5023/10345/1235/10161/2247/57468/2769/6346/9170/1946/79608/4760/222546/887/5020/6357/148/8048/6280/2898/9429/6261/1234/3171/111/5031/496/776/2626/7052/730/50507/126306/1909/57393/1268/958/57338/728215/2822/8938…
202	group_GSEA_Go_BP.csv	GO:0009746	GO:0009746	response to hexose	194	-0.540883	-1.171	0.011988	0.146842	0.128813	3607	tags=25%, list=19%, signal=20%	2645/5076/83667/1946/4760/222546/9370/6518/111/2626/50507/57393/2822/8938/389692/7040/55107/3745/125111/1215/1285/5798/3172/9971/2850/79727/7200/51085/2695/5743/7447/4821/26291/2697/5313/10804/150/285/2641/1392/1292/169026/4023/114/5105/5799/3170/7494
203	group_GSEA_Go_BP.csv	GO:0045596	GO:0045596	negative regulation of cell differentiation	684	-0.541508	-1.18643	0.000999001	0.0293189	0.0257191	4452	tags=33%, list=24%, signal=26%	6657/54437/57115/3142/1902/4773/862/26052/6014/10500/51804/7422/8829/6695/152330/2043/4763/3558/2192/5997/57761/8324/161882/7001/3718/579/7041/429/493829/494551/84695/348093/1600/221044/859/5727/11006/2213/3205/55079/56920/2066/5080/7080/440560/3690/2255/1401/1071/10220/57540/1946/5468/7483/1942/6935/441871/343068/9370/8626/93166/1735/114990/6662/6900/28959/202151/130120/7124/84059/6653/5087/6096…
204	group_GSEA_Go_BP.csv	GO:0006022	GO:0006022	aminoglycan metabolic process	169	-0.541527	-1.17142	0.022977	0.202702	0.177814	5132	tags=36%, list=27%, signal=26%	114771/23563/2296/1486/4969/129530/2719/9435/56548/3038/5549/92126/57115/166012/80760/1463/63827/3425/11081/374907/55790/27159/2247/64711/1118/222537/1950/50859/3082/29940/84752/64579/7040/10082/57214/4958/1464/6383/1634/10331/83539/50515/64131/5155/133584/10894/3036/5159/284/23553/9953/633/51363/9956/1462/347365/3553/176/11227/9955/2331
205	group_GSEA_Go_BP.csv	GO:0003205	GO:0003205	cardiac chamber development	166	-0.541686	-1.17208	0.021978	0.196222	0.17213	5286	tags=41%, list=28%, signal=30%	10370/5754/5138/4193/4208/2296/4194/23414/652/9464/7135/287/65250/6604/2303/11174/8701/5629/10848/8829/2294/161882/9510/6586/7481/859/7139/6331/4846/4052/4634/2626/57167/23462/5950/54567/10512/4607/2625/6899/93649/7040/4887/129446/27302/5125/4889/1301/5318/80000/6262/26508/9353/9241/7010/7042/639/655/653/2263/5915/6910/4036/6423/64220/1482/57057/6664
206	group_GSEA_Go_BP.csv	GO:0046683	GO:0046683	response to organophosphorus	132	-0.542036	-1.16626	0.041958	0.272916	0.239407	3151	tags=27%, list=17%, signal=23%	5020/9370/5031/374/2039/50507/348980/1645/1261/5030/64805/5798/9472/7490/4327/3488/5139/5743/5026/5322/5313/7010/6531/5179/445/358/1277/7056/7425/5294/6781/6547/10021/5105/5972/3553
207	group_GSEA_Go_BP.csv	GO:0034764	GO:0034764	positive regulation of transmembrane transport	198	-0.542134	-1.17516	0.011988	0.146842	0.128813	5613	tags=44%, list=30%, signal=31%	246329/1080/1815/5174/3596/65268/114898/7114/65018/90070/84766/3753/7220/57158/65267/57165/9992/10368/3458/5649/2719/481/30845/287/23433/65266/3759/6769/3784/10142/5027/3767/440699/288/25999/3747/3746/799/88/10345/388591/9370/6506/2688/5031/27092/342667/844/9001/187/4923/5458/57214/3736/644139/9472/23237/3359/2048/6262/2695/729230/4283/1812/55600/3757/26291/2946/54209/389816/10369/183/9002/1908/6…
208	group_GSEA_Go_BP.csv	GO:0002793	GO:0002793	positive regulation of peptide secretion	280	-0.542212	-1.18198	0.000999001	0.0293189	0.0257191	5099	tags=40%, list=27%, signal=30%	51744/10626/55638/116/3458/952/23705/192683/260434/5319/2268/55204/247/64135/27063/5600/8447/373509/5734/8862/3717/26253/5027/2696/79679/3558/640/846/112744/91608/353514/55612/23586/945/186/27159/2645/6346/7349/2266/222546/5005/834/23086/8600/7124/1956/5950/29126/57393/338322/2822/8938/10874/9619/2625/51311/7040/55107/4887/654/9447/6288/22861/5008/7292/2691/3569/9971/43/2850/7424/90865/7200/56253…
209	group_GSEA_Go_BP.csv	GO:0032101	GO:0032101	regulation of response to external stimulus	786	-0.54232	-1.18936	0.000999001	0.0293189	0.0257191	4525	tags=35%, list=24%, signal=28%	65249/64581/11326/4210/145581/9048/54437/1902/5654/56547/5734/57118/51191/10500/3572/388125/7422/3929/3717/8829/1191/5270/2043/5158/80709/1907/3558/472/9180/81793/2294/2978/846/112744/7001/566/25960/2895/27293/353514/83666/2841/23586/330/114132/7133/725/2213/5340/1051/84699/55079/56920/5603/1235/405753/115362/2247/6346/2255/1380/23746/7349/53833/1880/2266/5468/3848/720/2152/3434/3055/3071/4846/90…
210	group_GSEA_Go_BP.csv	GO:0050954	GO:0050954	sensory perception of mechanical stimulus	164	-0.542322	-1.17293	0.027972	0.225908	0.198171	3664	tags=34%, list=20%, signal=28%	340990/9132/5205/7349/2561/1141/51473/3673/776/26018/84059/643226/339768/5456/140469/53405/3249/6899/64787/3356/1302/2706/7068/1285/9750/5458/57214/246213/2138/388551/117531/65217/3736/6323/8989/1301/53942/644168/51475/84189/2917/5172/146183/10804/7401/1690/40/64699/1833/1277/6387/4914/4036/56914/125336/55584
211	group_GSEA_Go_BP.csv	GO:0002790	GO:0002790	peptide secretion	601	-0.542461	-1.18868	0.000999001	0.0293189	0.0257191	4281	tags=33%, list=23%, signal=26%	23568/80725/55366/8862/3717/26253/5027/2696/79679/3558/3767/640/81793/846/112744/1803/91608/5991/6623/7100/27445/353514/55612/23586/201158/945/3747/186/7133/27159/2213/2645/115362/59082/6346/284297/3557/1401/7349/2266/1946/8997/79400/4760/4053/222546/5005/834/4547/9066/959/3694/440068/7850/2693/4345/23086/111/1116/776/8600/7124/9636/2039/1956/5950/29126/7857/57393/1268/338322/958/2822/8938/10874/…
212	group_GSEA_Go_BP.csv	GO:0042391	GO:0042391	regulation of membrane potential	417	-0.542648	-1.1876	0.000999001	0.0293189	0.0257191	4477	tags=37%, list=24%, signal=29%	6546/2897/3759/2565/2563/3784/10142/5071/29119/2537/5027/3766/8506/1145/3767/27094/610/2556/2568/288/2895/54831/6328/3747/859/774/3746/9424/2559/5023/88/2257/10345/285242/266743/3786/1143/2561/60598/6331/1141/2273/388591/148/8913/2898/3762/3728/3764/2570/885/776/27092/11280/1824/170572/1268/8911/348980/9162/2555/3775/4988/6326/27133/1137/54207/6335/785/27345/3745/55879/4887/441509/6330/4923/7224/…
213	group_GSEA_Go_BP.csv	GO:0035239	GO:0035239	tube morphogenesis	802	-0.54269	-1.19017	0.000999001	0.0293189	0.0257191	3744	tags=29%, list=20%, signal=24%	348093/7481/5241/5979/57822/26051/186/859/1286/5727/3953/151449/5076/7080/64399/2247/3690/2255/80781/5468/3911/1942/3848/79400/51378/2152/6935/57125/4638/344022/340419/4846/27286/388591/57619/575/8626/161198/2693/5787/6662/2049/3728/10267/1950/1116/8091/7124/5087/2626/10481/170690/7052/3082/3135/2736/57167/374/23462/1956/1909/7857/54567/8456/9982/2321/100506013/958/3576/2822/2833/9645/2625/9788/8…
214	group_GSEA_Go_BP.csv	GO:0030308	GO:0030308	negative regulation of cell growth	180	-0.542721	-1.17375	0.015984	0.169482	0.148673	3755	tags=28%, list=20%, signal=22%	6586/7481/186/859/1029/83667/56920/5468/2273/135644/2786/4133/10512/10371/684/1630/4881/978/7040/92304/3273/8711/6696/27302/3624/3172/6422/2045/7490/374946/64321/85004/53335/2487/9353/2697/223117/183/94/7042/5999/7143/51083/4879/4504/6423/9723/344901/623/81501
215	group_GSEA_Go_BP.csv	GO:0015672	GO:0015672	monovalent inorganic cation transport	503	-0.543014	-1.18985	0.000999001	0.0293189	0.0257191	4572	tags=36%, list=24%, signal=28%	157855/287/6507/65266/6546/3748/3759/3750/3784/26249/10142/3769/6338/5270/5027/3766/286183/60482/113235/3767/57835/440699/27094/84679/610/115584/200010/285335/84701/288/57731/10568/6583/6328/3747/859/1339/3746/6543/6005/3744/9424/2645/9132/84419/88/2257/154215/57468/3786/9058/60598/79400/6331/2273/5349/4846/388591/64849/3762/3754/1346/3764/7351/64078/496/776/53822/79570/11280/57520/255738/6526/34…
216	group_GSEA_Go_BP.csv	GO:0050714	GO:0050714	positive regulation of protein secretion	261	-0.543242	-1.18321	0.001998	0.0457645	0.0401455	5099	tags=40%, list=27%, signal=29%	51744/10626/55638/3458/952/23705/192683/260434/5319/2268/55204/247/64135/27063/5600/8447/373509/5734/3717/26253/5027/2696/79679/3558/640/846/112744/353514/55612/23586/945/186/27159/2645/6346/2266/222546/5005/834/23086/7124/1956/5950/29126/57393/338322/2822/8938/10874/9619/2625/51311/7040/55107/654/9447/6288/22861/5008/7292/3569/9971/43/2850/7424/90865/7200/56253/2695/7293/5004/1813/7447/18/81285/…
217	group_GSEA_Go_BP.csv	GO:0050801	GO:0050801	ion homeostasis	791	-0.543261	-1.19151	0.000999001	0.0293189	0.0257191	4370	tags=33%, list=23%, signal=26%	26249/5734/79689/5071/551/6338/492/3717/2537/201140/1356/793/53940/5027/3766/5158/2696/30061/1907/344905/1524/3558/113235/57835/846/84679/10699/7779/285335/11346/288/7380/6424/2841/10568/79054/186/859/6543/552/6005/55630/799/6359/5023/2257/10345/1235/10161/2247/57468/2769/6346/54757/1071/9170/79608/6331/2273/887/5020/6357/148/8048/8913/6280/2898/9429/6261/1234/111/5031/496/885/776/8600/7052/730/1…
218	group_GSEA_Go_BP.csv	GO:0048705	GO:0048705	skeletal system morphogenesis	236	-0.543336	-1.18083	0.001998	0.0457645	0.0401455	5188	tags=41%, list=28%, signal=30%	1293/4208/84159/2296/2260/497189/7059/6862/3214/652/57642/4148/1746/3213/4054/2268/3198/3215/162466/2303/1280/51804/5027/579/9496/4325/6424/3216/2261/55790/340260/1294/64399/4322/3224/3227/7483/6935/2201/6662/642658/144347/1291/6899/7484/3218/7040/60529/2251/654/5156/9350/3199/1311/6422/2138/3200/1301/860/7476/5075/50515/130497/60676/257/158326/9241/5396/7010/81578/1044/655/2263/1690/4920/51435/7…
219	group_GSEA_Go_BP.csv	GO:0071322	GO:0071322	cellular response to carbohydrate stimulus	138	-0.543421	-1.17078	0.037962	0.259893	0.227983	3562	tags=25%, list=19%, signal=20%	5076/5603/1946/4760/222546/6518/111/2626/50507/57393/2822/8938/55107/3745/1215/5798/9971/2850/79727/10203/51085/7447/26291/10804/150/2641/81035/1392/5579/114/5105/5799/3170/7494
220	group_GSEA_Go_BP.csv	GO:0030168	GO:0030168	platelet activation	153	-0.543977	-1.17483	0.024975	0.211068	0.185153	3588	tags=29%, list=19%, signal=24%	558/5023/2769/3690/2266/959/4846/51206/2039/1607/1606/958/9162/9630/3273/5582/146850/5156/64805/6288/1311/3569/83706/10077/5197/170692/51266/10630/18/2207/5155/150/9002/375033/6850/5196/1277/7056/5294/5579/7225/3937/1281/2151/1278
221	group_GSEA_Go_BP.csv	GO:0006873	GO:0006873	cellular ion homeostasis	650	-0.543988	-1.19179	0.000999001	0.0293189	0.0257191	4253	tags=32%, list=23%, signal=26%	492/3717/201140/1356/793/53940/5027/5158/2696/30061/1907/344905/1524/3558/113235/57835/846/84679/7779/285335/11346/2841/10568/79054/186/859/6543/552/6005/55630/799/6359/5023/10345/1235/10161/2247/57468/2769/6346/9170/79608/887/5020/6357/148/8048/6280/2898/9429/6261/1234/111/5031/496/776/7052/730/126306/1909/1268/958/57338/728215/10874/2833/5745/1233/1991/2829/51310/3356/643/7040/844/4887/89885/50…
222	group_GSEA_Go_BP.csv	GO:0033500	GO:0033500	carbohydrate homeostasis	228	-0.544	-1.18209	0.003996	0.0732048	0.0642167	3670	tags=27%, list=20%, signal=22%	859/5727/3953/2645/5076/648791/83667/5080/1946/5468/4760/222546/9370/8048/3171/111/2626/1621/143686/50507/5950/57393/1268/2822/8938/80201/441925/168620/9515/55107/3745/1050/1215/54097/5166/5798/3172/9971/2850/79727/5443/3488/51085/6755/7447/2538/56670/57818/26291/10804/123876/150/2641/1392/7425/114/64478/5105/7021/5799/3170/7494
223	group_GSEA_Go_BP.csv	GO:0042593	GO:0042593	glucose homeostasis	228	-0.544	-1.18209	0.003996	0.0732048	0.0642167	3670	tags=27%, list=20%, signal=22%	859/5727/3953/2645/5076/648791/83667/5080/1946/5468/4760/222546/9370/8048/3171/111/2626/1621/143686/50507/5950/57393/1268/2822/8938/80201/441925/168620/9515/55107/3745/1050/1215/54097/5166/5798/3172/9971/2850/79727/5443/3488/51085/6755/7447/2538/56670/57818/26291/10804/123876/150/2641/1392/7425/114/64478/5105/7021/5799/3170/7494
224	group_GSEA_Go_BP.csv	GO:0009952	GO:0009952	anterior/posterior pattern specification	218	-0.544748	-1.18271	0.00599401	0.0941182	0.0825623	5049	tags=39%, list=27%, signal=28%	2296/7026/497189/6862/3214/92129/652/3213/6469/2719/80055/3215/2303/9096/1045/7478/7482/54626/472/2294/7832/389549/3216/10655/2114/3205/55079/390992/5080/3224/10220/3227/4760/163589/4222/85407/5087/2626/2736/23462/5362/10512/10409/6899/57801/6496/3218/60529/28514/9350/3199/5125/7704/6422/391723/3200/7490/23237/9573/64321/3222/441478/3219/26508/650/5075/130497/2018/84667/9241/1044/5100/56033/5046/…
225	group_GSEA_Go_BP.csv	GO:0007586	GO:0007586	digestion	137	-0.544876	-1.17309	0.033966	0.248735	0.218195	4377	tags=41%, list=23%, signal=32%	3784/55765/6718/9245/113235/248/80168/8435/1133/56667/27159/6476/1118/2255/7349/1646/4760/887/5020/2693/6662/6518/885/2984/5950/643834/10874/1645/6750/1131/5731/6779/115111/335/3274/5225/8972/279/5646/1208/5733/7032/389383/64127/150/79924/6514/1392/358/337/340204/6523/5406/948/12/6863
226	group_GSEA_Go_BP.csv	GO:0106106	GO:0106106	cold-induced thermogenesis	142	-0.544938	-1.17518	0.032967	0.24444	0.214428	4386	tags=32%, list=23%, signal=24%	2303/8473/7422/55366/3717/2104/56034/283455/6319/79054/3953/1051/3910/5020/9370/7351/8809/1621/23090/5334/1149/3606/5618/43/153/7350/216/33/51316/155/51087/729230/1734/4858/26291/338557/3934/2697/6850/64641/11096/50486/948/1240/6588
227	group_GSEA_Go_BP.csv	GO:0120161	GO:0120161	regulation of cold-induced thermogenesis	142	-0.544938	-1.17518	0.032967	0.24444	0.214428	4386	tags=32%, list=23%, signal=24%	2303/8473/7422/55366/3717/2104/56034/283455/6319/79054/3953/1051/3910/5020/9370/7351/8809/1621/23090/5334/1149/3606/5618/43/153/7350/216/33/51316/155/51087/729230/1734/4858/26291/338557/3934/2697/6850/64641/11096/50486/948/1240/6588
228	group_GSEA_Go_BP.csv	GO:0007548	GO:0007548	sex differentiation	268	-0.544983	-1.18838	0.000999001	0.0293189	0.0257191	5406	tags=43%, list=29%, signal=31%	344758/10272/5926/1761/10370/30812/8531/84159/7784/116/2296/497189/7022/638/23414/6736/268/3157/6469/3623/8999/2099/6716/51742/4257/546/91181/122042/23626/51804/7422/55366/2492/3383/7482/472/8204/9510/10388/6586/5241/728395/3205/1051/558/63946/7080/8743/2255/2620/56956/4846/8626/1602/6662/642658/642636/5087/2626/63951/5950/10409/10371/8644/2625/1586/367/7484/58524/4142/654/5156/26471/400629/3624/…
229	group_GSEA_Go_BP.csv	GO:0009410	GO:0009410	response to xenobiotic stimulus	285	-0.544996	-1.18778	0.000999001	0.0293189	0.0257191	3296	tags=26%, list=18%, signal=22%	5468/590/1141/5020/2693/6261/26227/1621/27092/23284/1956/390084/1268/4988/6097/91703/1645/54575/3356/7040/2706/13/5582/1544/57412/3172/6817/29785/3359/5446/54577/1816/64757/84152/6262/1559/348158/2947/2902/1813/1812/1394/6870/18/10/2660/2944/570/196541/2946/1906/5155/6529/6531/5179/445/5999/54576/2327/779/1392/1558/358/2155/5153/2940/3351/6999/387758/114/2326/5105/5742/2328/6863
230	group_GSEA_Go_BP.csv	GO:0008277	GO:0008277	regulation of G protein-coupled receptor signaling pathway	144	-0.545154	-1.17653	0.02997	0.233882	0.205166	4245	tags=33%, list=23%, signal=26%	8862/9737/8601/5158/2696/6855/5997/2978/6003/799/23746/2788/6900/10267/2786/6754/100506013/3576/6010/4988/25818/441925/54550/10266/187/5064/2850/6004/85397/5475/1759/1813/6352/3000/1259/64407/1906/1258/5999/8490/8786/4842/3357/3351/718/10268/55/5996
231	group_GSEA_Go_BP.csv	GO:0050906	GO:0050906	detection of stimulus involved in sensory perception	480	-0.54526	-1.19325	0.000999001	0.0293189	0.0257191	4705	tags=35%, list=25%, signal=27%	79549/8392/388761/121275/283162/442186/120796/26493/390081/138883/219431/54437/391195/563/391189/219956/778/286365/81466/219453/127623/50839/401994/5270/26476/259296/259293/441608/26735/390648/81392/196335/343170/138882/346562/285093/259290/51761/390037/127069/128371/391194/283160/347468/259285/283297/132112/346517/259292/50832/392138/50837/341276/219858/119679/392391/81470/389090/3673/79339/1435…
232	group_GSEA_Go_BP.csv	GO:0006816	GO:0006816	calcium ion transport	419	-0.545347	-1.19333	0.000999001	0.0293189	0.0257191	3700	tags=31%, list=20%, signal=25%	945/79054/859/774/6543/2645/799/5023/10345/11141/2247/7349/10316/1141/4638/4846/148/8913/1447/6261/1234/10267/1950/5031/776/27092/342667/126306/57338/728215/8911/4988/1137/2916/785/168620/2701/3356/7040/844/10266/5957/9001/187/4923/64805/7224/57214/815/5330/6355/55799/117531/9472/378807/10203/25769/8989/7223/816/56302/6262/5743/4283/286097/2902/1813/773/6352/1812/27091/1394/5026/2906/117/140738/1…
233	group_GSEA_Go_BP.csv	GO:0030203	GO:0030203	glycosaminoglycan metabolic process	160	-0.545436	-1.17853	0.023976	0.207247	0.181801	5132	tags=35%, list=27%, signal=26%	114771/23563/2296/4969/129530/2719/9435/56548/3038/5549/92126/57115/166012/80760/1463/63827/3425/11081/55790/2247/64711/222537/1950/50859/3082/29940/64579/7040/10082/57214/4958/1464/6383/1634/10331/83539/50515/64131/5155/133584/10894/3036/5159/284/23553/9953/633/51363/9956/1462/347365/3553/176/11227/9955/2331
234	group_GSEA_Go_BP.csv	GO:0014013	GO:0014013	regulation of gliogenesis	114	-0.545573	-1.17262	0.044955	0.280659	0.246199	5277	tags=43%, list=28%, signal=31%	23529/30812/57165/1435/4049/116/10215/1746/6469/146433/3572/5270/2043/4763/1524/26011/1600/7133/1880/5468/5324/7732/84630/6900/7124/170825/430/7161/7040/64805/3569/79727/6692/650/729230/5803/4916/4821/9241/54209/6348/2016/7097/7101/4036/3553/5764/6664/6663
235	group_GSEA_Go_BP.csv	GO:0098742	GO:0098742	cell-cell adhesion via plasma-membrane adhesion molecules	271	-0.545706	-1.18965	0.000999001	0.0293189	0.0257191	4725	tags=44%, list=25%, signal=33%	22920/56127/56135/10686/56126/56107/51208/22859/26285/145581/81607/57575/214/64405/8641/8832/28513/1005/1365/29930/3383/152330/84665/56100/5101/26011/56103/9073/2895/56102/56123/56132/60437/1600/5979/221935/56122/57126/30835/56111/56110/56104/10205/11141/3557/1946/5098/56109/9708/120425/9370/6900/56108/56097/56125/56124/23284/1824/56098/5068/56128/27328/57717/9746/1007/91179/54798/56101/56121/100…
236	group_GSEA_Go_BP.csv	GO:0098771	GO:0098771	inorganic ion homeostasis	726	-0.545904	-1.19669	0.000999001	0.0293189	0.0257191	4314	tags=33%, list=23%, signal=26%	5071/551/6338/492/3717/201140/1356/793/53940/5027/3766/5158/2696/30061/1907/344905/1524/3558/113235/57835/846/84679/10699/7779/285335/11346/288/7380/6424/2841/10568/79054/186/859/6543/552/6005/55630/799/6359/5023/10345/1235/10161/2247/57468/2769/6346/54757/9170/79608/887/5020/6357/148/8048/6280/2898/9429/6261/1234/111/5031/496/776/8600/7052/730/1956/126306/1909/66002/1268/958/57338/728215/10874/2…
237	group_GSEA_Go_BP.csv	GO:0001501	GO:0001501	skeletal system development	506	-0.546385	-1.19716	0.000999001	0.0293189	0.0257191	4853	tags=37%, list=26%, signal=28%	652/57642/4148/1746/3213/6469/6694/7045/4054/9464/3623/1750/2268/3198/51208/3215/5364/5788/26160/162466/5549/2303/265/5734/1280/51804/1463/5027/7482/56034/63827/9060/112744/161882/632/579/91461/9496/4325/6424/3216/10655/7481/2114/2261/55790/340260/1294/3205/64399/2247/4322/3224/10220/3227/7483/6935/340419/1298/54360/8626/2201/6261/6662/642658/2688/202151/1116/8091/8600/5087/144347/1291/2736/3714/…
238	group_GSEA_Go_BP.csv	GO:0003206	GO:0003206	cardiac chamber morphogenesis	125	-0.546593	-1.17521	0.035964	0.253655	0.222511	5363	tags=43%, list=29%, signal=31%	58495/10370/4193/4208/2296/23414/652/9464/7135/6604/2303/8701/5629/10848/8829/2294/161882/9510/6586/7481/859/7139/4846/4634/2626/23462/5950/54567/10512/4607/2625/6899/7040/4887/27302/4889/1301/5318/6262/26508/9353/9241/7010/7042/655/653/2263/5915/6910/4036/6423/1482/57057/6664
239	group_GSEA_Go_BP.csv	GO:0016079	GO:0016079	synaptic vesicle exocytosis	117	-0.546663	-1.17488	0.042957	0.275608	0.241769	3548	tags=34%, list=19%, signal=28%	440279/5027/6855/27445/5023/321/6853/1141/9066/148/91683/776/6861/112476/26059/1268/9162/1137/6616/3356/339302/9515/8618/5582/5030/815/143425/112755/6857/8973/7476/1813/1812/9699/1129/23025/3351/5579/9900/22999
240	group_GSEA_Go_BP.csv	GO:0030003	GO:0030003	cellular cation homeostasis	637	-0.546693	-1.19767	0.000999001	0.0293189	0.0257191	4253	tags=32%, list=23%, signal=26%	492/3717/201140/1356/793/53940/5027/5158/2696/30061/1907/344905/1524/3558/113235/57835/846/84679/7779/285335/11346/2841/79054/186/859/6543/552/55630/799/6359/5023/10345/1235/10161/2247/2769/6346/9170/79608/887/5020/6357/148/8048/6280/2898/9429/6261/1234/111/5031/496/776/7052/730/126306/1909/1268/958/57338/728215/10874/2833/5745/1233/1991/2829/51310/3356/643/7040/844/4887/89885/5030/9001/654/5156/…
241	group_GSEA_Go_BP.csv	GO:0055080	GO:0055080	cation homeostasis	715	-0.54682	-1.19872	0.000999001	0.0293189	0.0257191	4314	tags=33%, list=23%, signal=26%	5071/551/6338/492/3717/201140/1356/793/53940/5027/3766/5158/2696/30061/1907/344905/1524/3558/113235/57835/846/84679/10699/7779/285335/11346/288/7380/2841/79054/186/859/6543/552/6005/55630/799/6359/5023/10345/1235/10161/2247/57468/2769/6346/54757/9170/79608/887/5020/6357/148/8048/6280/2898/9429/6261/1234/111/5031/496/776/8600/7052/730/1956/126306/1909/66002/1268/958/57338/728215/10874/2833/5745/63…
242	group_GSEA_Go_BP.csv	GO:0050796	GO:0050796	regulation of insulin secretion	174	-0.547139	-1.18269	0.013986	0.15837	0.138926	4314	tags=33%, list=23%, signal=26%	5071/23568/3717/2696/3767/640/846/1803/5991/3747/2645/1946/4760/222546/9066/2693/111/776/7124/5950/57393/1268/2822/8938/6616/9515/55107/3745/143425/3172/6422/9971/2850/7200/6833/2695/6755/1813/773/6352/7447/18/57818/4843/3625/2697/150/2641/6514/1392/169026/114/11069/775/7021/2740/3553/3170
243	group_GSEA_Go_BP.csv	GO:0009743	GO:0009743	response to carbohydrate	222	-0.54714	-1.18808	0.002997	0.0595489	0.0522375	3607	tags=26%, list=19%, signal=21%	2645/5076/83667/5603/1946/4760/222546/5020/9370/6518/111/3673/4199/2626/50507/57393/2822/8938/389692/7040/55107/3745/125111/1215/1285/5798/3172/9971/2850/79727/10203/7200/51085/2695/5743/7447/4821/26291/2697/5313/10804/150/285/6529/2641/81035/1392/1292/169026/5579/4023/114/5105/5799/3553/3170/7494
244	group_GSEA_Go_BP.csv	GO:0002440	GO:0002440	production of molecular mediator of immune response	195	-0.547247	-1.18508	0.00899101	0.12375	0.108556	4313	tags=32%, list=23%, signal=25%	55765/100141515/3119/9245/3558/472/3718/23586/7133/2213/9865/1235/10538/8807/959/1178/7124/8809/3135/5950/30009/5650/958/10225/25818/684/1991/2625/3606/126259/7040/57379/7292/3569/3554/3456/335/90865/7441/5225/10417/11005/10673/729230/7293/91543/2207/202309/5452/84433/64127/7042/115352/2865/11213/7097/284/114548/2150/948/3553/10875/7494
245	group_GSEA_Go_BP.csv	GO:0030001	GO:0030001	metal ion transport	856	-0.547282	-1.20132	0.000999001	0.0293189	0.0257191	4427	tags=35%, list=24%, signal=28%	3759/6769/3750/3784/26249/10142/79689/3769/8832/778/6338/492/201140/100507027/3383/1356/53940/5270/5027/3766/283229/286183/60482/30061/387849/3767/57835/440699/846/27094/84679/610/6406/115584/7779/200010/285335/140803/152519/288/353514/80036/57731/10568/6583/6328/945/3747/79054/859/774/3746/6543/3744/9424/2645/9132/55630/799/5023/88/2257/10345/11141/154215/2247/57468/3786/57348/7349/9058/10316/60…
246	group_GSEA_Go_BP.csv	GO:0035265	GO:0035265	organ growth	177	-0.547347	-1.1834	0.010989	0.140748	0.123467	5188	tags=41%, list=28%, signal=30%	1293/55841/8531/4208/2296/2260/7059/23414/57642/4148/6469/2099/4921/65009/5600/3142/2303/5629/26281/5997/26011/2261/186/1294/859/3953/2066/2247/4322/2255/768239/5324/340419/148/6662/2626/1291/5950/2252/10409/7161/367/28514/9350/27302/1311/9472/7490/1901/9241/2697/1906/183/7042/81578/5999/2263/1690/2254/51435/7373/5159/5915/6910/1292/6781/84944/5212/340706/344901/57502/1482/57057
247	group_GSEA_Go_BP.csv	GO:0010810	GO:0010810	regulation of cell-substrate adhesion	208	-0.547585	-1.18791	0.00599401	0.0941182	0.0825623	4278	tags=31%, list=23%, signal=24%	7422/3717/8829/246/6695/4763/2192/2294/8324/1842/22915/55612/79812/1029/5340/4811/2266/1946/90102/3728/2039/5881/340533/57662/10085/3273/4887/57091/5880/6422/8631/335/25975/683/25890/2199/10630/375567/5328/5054/129080/94/285/7010/133584/151887/64094/4653/2633/55966/1277/29984/395/10631/3204/1295/4321/9723/1012/347/948/7070/5212/7471/5764
248	group_GSEA_Go_BP.csv	GO:0014074	GO:0014074	response to purine-containing compound	146	-0.547802	-1.18218	0.021978	0.196222	0.17213	3296	tags=28%, list=18%, signal=23%	5468/5020/9370/6261/5031/374/2039/50507/348980/1261/5030/64805/5798/9472/7490/4327/3488/6262/5139/5743/5026/5322/2946/5313/7010/6529/6531/5179/445/779/358/1277/7056/7425/5294/6781/6547/10021/5105/5972/3553
249	group_GSEA_Go_BP.csv	GO:0046661	GO:0046661	male sex differentiation	158	-0.547919	-1.18401	0.01998	0.184642	0.161972	5364	tags=43%, list=29%, signal=31%	10272/5926/1761/10370/30812/8531/84159/7022/638/23414/6736/268/3157/6469/3623/2099/6716/51742/4257/546/91181/122042/51804/55366/2492/3383/7482/10388/3205/7080/8743/2255/56956/6662/642658/642636/2626/10371/8644/2625/367/7484/58524/4142/654/5156/26471/400629/3624/6422/7490/269/80000/3293/190/132625/2697/3973/7042/653/4920/2254/56159/5159/4914/4036/6423/5972
250	group_GSEA_Go_BP.csv	GO:0007610	GO:0007610	behavior	589	-0.547965	-1.20028	0.000999001	0.0293189	0.0257191	4314	tags=34%, list=23%, signal=27%	5071/551/8701/51168/8862/339403/793/5270/2043/4763/3766/4130/57578/10882/1524/846/7832/283869/1803/6623/11346/57731/390259/79846/1600/8528/221935/186/4861/774/340990/3953/6543/552/1051/55079/51761/2257/7080/266743/57468/321/1143/5730/7349/4543/8997/590/1141/93986/5020/27286/2898/1602/84630/2693/6900/6506/111/885/54429/9379/1621/127534/23284/1956/63951/390084/2571/1268/59272/627/57338/57626/4803/1…
251	group_GSEA_Go_BP.csv	GO:0001936	GO:0001936	regulation of endothelial cell proliferation	124	-0.547984	-1.17803	0.036963	0.257397	0.225794	5539	tags=45%, list=30%, signal=32%	9037/3676/10000/3586/2624/4208/79805/64102/2260/7026/2324/1960/652/2277/51162/22846/5629/7422/8862/8829/4763/26051/2247/3690/5468/2152/2693/7124/7857/54567/9982/2321/100506013/7498/654/187/7424/6369/5617/441478/650/57608/6356/185/2697/5155/94/7010/7432/1232/6347/3357/6387/1012/10344/23213
252	group_GSEA_Go_BP.csv	GO:0045765	GO:0045765	regulation of angiogenesis	277	-0.548012	-1.19456	0.000999001	0.0293189	0.0257191	3296	tags=28%, list=18%, signal=24%	5468/1942/3848/51378/2152/4846/27286/575/2693/3728/1116/8091/2626/3082/3135/54567/9982/2321/100506013/958/3576/4881/126259/10266/3273/28514/146850/187/1215/1285/3569/6422/1634/7424/6369/5617/2828/11005/5743/729230/2246/57608/10563/5054/7075/6356/5740/168667/185/84432/3579/183/94/285/7010/7042/64094/3627/79924/90993/5196/1232/306/358/7101/718/5579/641700/4879/3552/6423/9723/3553/23213/4223/5764/60…
253	group_GSEA_Go_BP.csv	GO:0042471	GO:0042471	ear morphogenesis	118	-0.548115	-1.17777	0.03996	0.26573	0.233104	5369	tags=44%, list=29%, signal=32%	10083/3638/5754/2624/2260/497189/79955/115908/133060/340784/1750/3198/1280/5629/51804/51168/579/8323/57822/9132/5076/51761/2255/6935/6662/26018/2736/5456/140469/2625/3249/6899/3199/9750/2138/1301/2048/2487/84189/130497/9241/1906/10804/5396/7401/3167/2263/4920/2254/8516/55584/7471
254	group_GSEA_Go_BP.csv	GO:0015698	GO:0015698	inorganic anion transport	166	-0.548134	-1.18603	0.014985	0.165637	0.1453	4049	tags=47%, list=22%, signal=37%	2567/9213/1184/5593/84230/1080/56172/1836/83697/1179/6568/6528/25932/2260/2743/8671/1183/26285/6507/65266/2565/2563/57835/846/2556/2568/6424/10568/54831/7038/1051/2559/6505/57468/57348/10316/2561/65012/5349/5031/2570/53405/2555/7809/55107/55879/5030/441509/266675/1188/80131/8074/57030/8542/115111/9022/9635/8001/150160/57101/11095/1187/54102/6557/9356/5172/1193/2569/2557/84561/55867/2554/200959/25…
255	group_GSEA_Go_BP.csv	GO:0061138	GO:0061138	morphogenesis of a branching epithelium	181	-0.548146	-1.18551	0.00999001	0.132244	0.116007	4285	tags=38%, list=23%, signal=29%	5629/51804/7422/55366/8829/7482/2294/846/5241/186/859/5727/151449/5076/7080/64399/2247/2255/3911/340419/8626/6662/1950/7124/5087/10481/170690/7052/3082/2736/374/1909/54567/2252/10512/10371/367/7484/7040/7475/6422/2138/7490/80000/8521/6768/441478/6692/8642/650/9353/2246/6356/9241/3237/1906/183/655/2263/3975/4776/84870/6423/9723/23213/57057/7471/6663
256	group_GSEA_Go_BP.csv	GO:0043588	GO:0043588	skin development	415	-0.548394	-1.20001	0.000999001	0.0293189	0.0257191	5246	tags=45%, list=28%, signal=33%	3859/353145/10628/440021/3856/1969/3850/25932/10626/319101/2296/85293/81872/353140/54474/1825/55504/1594/54206/284827/85291/147495/2304/6469/1041/3857/50604/94234/5154/728299/247/3868/126695/3886/6701/55366/3855/4050/3872/653240/81871/8689/43849/4763/643418/125981/100129271/3883/8688/3891/8323/55612/730755/80173/57822/3854/85294/353142/51761/8643/50509/5080/80144/140807/2255/6698/25984/337976/389…
257	group_GSEA_Go_BP.csv	GO:0009593	GO:0009593	detection of chemical stimulus	461	-0.549139	-1.20161	0.000999001	0.0293189	0.0257191	4743	tags=35%, list=25%, signal=27%	26689/79549/8392/388761/121275/283162/442186/120796/26493/64581/390081/138883/219431/391195/563/391189/219956/286365/81466/3929/219453/127623/50839/401994/26476/259296/259293/441608/26735/846/27094/390648/81392/196335/343170/138882/346562/285093/2645/259290/390037/127069/128371/284297/391194/283160/347468/259285/283297/132112/346517/259292/50832/392138/50837/341276/219858/119679/392391/81470/3890…
258	group_GSEA_Go_BP.csv	GO:0043491	GO:0043491	protein kinase B signaling	241	-0.54915	-1.19368	0.001998	0.0457645	0.0401455	3697	tags=32%, list=20%, signal=26%	5979/2261/859/558/799/5076/83667/2066/2247/2255/1646/2152/6662/1950/1116/8600/7124/2626/3082/3135/143686/374/1956/50507/2252/958/3481/8644/2625/388121/84830/7498/3606/57333/7066/7040/2251/5156/642273/64805/7039/8074/5008/3059/5880/118788/255324/79727/389400/3488/1813/2246/6352/2660/85453/9365/4015/6348/5155/7010/2263/2250/5314/375033/2254/4653/5159/2069/284/6347/2155/5294/10268/55273/4504/3553/14…
259	group_GSEA_Go_BP.csv	GO:0030278	GO:0030278	regulation of ossification	186	-0.549833	-1.18969	0.00799201	0.114228	0.100203	3151	tags=28%, list=17%, signal=24%	5020/8626/2201/6662/202151/7124/84059/5087/6096/144347/3082/9636/374/7040/1050/654/3199/8074/4958/117581/1311/7704/3569/6422/2662/6779/860/3488/650/8646/130497/64093/7477/9365/1901/9241/6348/2697/7042/655/63923/2263/4256/8519/26585/4745/50964/6423/344901/338773/5764/6664/6863
260	group_GSEA_Go_BP.csv	GO:0032675	GO:0032675	regulation of interleukin-6 production	136	-0.549924	-1.18439	0.026973	0.220242	0.1932	3843	tags=35%, list=20%, signal=28%	353514/23586/1051/27179/5603/3557/7349/27178/3071/2693/56300/4345/7124/3082/6504/338322/51311/84639/3635/53342/7292/51284/3569/9971/90865/10417/5004/671/2207/284194/54209/64127/114900/84632/6850/26191/11213/7097/2069/114899/2150/4023/26525/948/27177/3553/7494
261	group_GSEA_Go_BP.csv	GO:0042133	GO:0042133	neurotransmitter metabolic process	142	-0.549934	-1.18596	0.023976	0.207247	0.181801	5487	tags=45%, list=29%, signal=32%	285671/493/2185/54/7915/3586/3458/1545/121278/10394/6095/6507/64581/5053/51733/3717/1191/3383/60482/1524/747/55349/10003/186/6582/590/4846/22914/4128/26227/7124/1621/2571/8292/384/2731/29958/2572/145270/1757/1807/43/133121/7200/64902/5743/1103/3067/18/570/4843/5740/1906/183/6531/445/26002/4842/7097/5806/5153/100528032/948/3553
262	group_GSEA_Go_BP.csv	GO:0046887	GO:0046887	positive regulation of hormone secretion	129	-0.549942	-1.18274	0.030969	0.236428	0.207399	4245	tags=35%, list=23%, signal=27%	8862/3717/2696/640/846/91608/2645/7349/2266/222546/8600/1956/5950/57393/2822/8938/10874/55107/654/6696/3624/2691/9971/2850/2587/7200/668/2695/1813/7447/18/3625/2697/1906/7432/2641/1908/1392/114899/51083/169026/114/3814/6664/6863
263	group_GSEA_Go_BP.csv	GO:0060485	GO:0060485	mesenchyme development	270	-0.549945	-1.19912	0.000999001	0.0293189	0.0257191	5690	tags=44%, list=30%, signal=31%	4192/23187/283149/2668/10736/10252/64218/9037/84541/3202/70/58495/4017/10370/30812/5754/4193/4208/2296/2260/4194/2335/23414/268/652/6469/9464/147906/27250/58/54437/2303/265/10500/51804/7478/8829/80709/2294/7041/84695/7481/5979/80139/728395/5076/56920/2066/7080/2255/3911/1942/4846/90102/4222/114990/6662/642658/202151/8091/2626/3082/23462/1909/10512/10409/10371/3249/6899/7040/9350/59/3569/6422/6317…
264	group_GSEA_Go_BP.csv	GO:0001763	GO:0001763	morphogenesis of a branching structure	195	-0.549962	-1.19096	0.00699301	0.103924	0.0911642	4285	tags=37%, list=23%, signal=29%	5629/51804/7422/55366/8829/7482/2294/57471/846/5241/186/859/5727/151449/5076/7080/64399/2247/2255/3911/340419/8626/6662/1950/7124/5087/10481/170690/7052/3082/2736/374/1909/54567/2252/10512/10371/367/7484/7040/7475/6422/2138/2045/7490/80000/53335/8521/6768/441478/6692/8642/650/9353/1813/2246/6356/9241/3237/1906/183/639/655/2263/3975/4776/84870/6423/9723/23213/57057/7471/6663
265	group_GSEA_Go_BP.csv	GO:0045165	GO:0045165	cell fate commitment	261	-0.550247	-1.19847	0.000999001	0.0293189	0.0257191	5308	tags=48%, list=28%, signal=35%	7473/30812/2624/6660/4208/256297/4909/4654/2260/7026/10215/6862/23135/54738/8022/652/1746/6469/6095/9181/6657/2303/9096/5629/10297/7478/8829/7482/116448/8324/26038/161882/26011/9496/7041/429/84695/7481/2114/4063/5727/151449/1051/79923/55079/5076/8643/219409/2066/5080/7080/2247/2255/5468/7483/4760/10538/4656/6662/170825/2736/3714/23040/54567/30009/8456/347853/2625/6097/167826/6899/367/7484/63978/5…
266	group_GSEA_Go_BP.csv	GO:0010817	GO:0010817	regulation of hormone levels	520	-0.550308	-1.20583	0.000999001	0.0293189	0.0257191	3392	tags=30%, list=18%, signal=25%	3557/7349/125/866/1583/2266/1946/5122/8997/1646/4760/55809/222546/9066/9370/2693/1735/6783/111/776/8600/7124/2672/1956/5950/1082/57393/7252/1268/59272/2822/8938/8292/4803/10874/10170/3294/389692/8644/2625/1645/3249/158835/1586/6616/5947/9515/8425/55107/3745/654/5156/1215/54097/6696/114571/195814/1544/5125/90527/2028/8074/3624/5008/5798/143425/3172/2691/3569/6817/6422/9971/43/50700/2850/335/5443/2…
267	group_GSEA_Go_BP.csv	GO:0032963	GO:0032963	collagen metabolic process	103	-0.550782	-1.17942	0.048951	0.29568	0.259377	4380	tags=44%, list=23%, signal=34%	56547/265/64115/10609/5027/64066/118856/10536/4325/4239/4322/7349/4324/5468/8510/5657/642658/3673/7148/9508/64386/57333/7040/4320/3569/79148/1513/4319/4327/8710/55214/1289/1306/9509/4314/4318/2191/1520/90993/5159/1277/4312/4321/1278/9313
268	group_GSEA_Go_BP.csv	GO:0001890	GO:0001890	placenta development	149	-0.550824	-1.18869	0.016983	0.175146	0.153641	3333	tags=25%, list=18%, signal=21%	2709/5468/2693/430/23462/1956/100506013/3294/3481/2706/1050/6696/400629/1634/1437/374900/8521/6768/6692/5743/2707/4158/7477/5740/2697/5155/639/655/653/2263/4693/4188/6781/84870/23641/203447/5764
269	group_GSEA_Go_BP.csv	GO:0006954	GO:0006954	inflammatory response	726	-0.550959	-1.20777	0.000999001	0.0293189	0.0257191	4305	tags=36%, list=23%, signal=29%	3572/388125/3929/54658/3717/246/1191/3383/50616/5027/80709/30817/3558/2157/472/9180/81793/2294/3656/112744/2206/7001/1990/566/7100/27293/353514/330/150372/84695/3250/186/7133/27159/725/2213/1051/84699/558/6359/5023/9865/27179/5603/1235/405753/115362/59082/6346/1380/3557/1401/7349/53833/27189/5468/3848/720/2152/8807/353376/27178/5005/3055/959/3694/6357/9370/55061/8048/6374/7850/6280/84630/2693/225…
270	group_GSEA_Go_BP.csv	GO:0072089	GO:0072089	stem cell proliferation	113	-0.551048	-1.18385	0.041958	0.272916	0.239407	5600	tags=47%, list=30%, signal=33%	677/131405/7474/6591/8326/10736/27185/2120/192669/58495/7473/6660/2260/84133/6469/4054/9181/5788/6604/9048/126695/7422/4763/80709/7482/1524/2192/747/429/55612/79923/5080/64399/2247/8091/6496/7066/7040/54345/7424/3736/64321/1813/7477/1636/2263/63950/7101/6423/7471/5764/6664/6663
271	group_GSEA_Go_BP.csv	GO:0007178	GO:0007178	transmembrane receptor protein serine/threonine kinase signaling pathway	329	-0.55109	-1.20358	0.000999001	0.0293189	0.0257191	3889	tags=27%, list=21%, signal=22%	7041/6424/55612/348093/80139/859/151449/7080/83729/1030/8483/2255/10220/6935/4053/4052/10468/2201/114990/642658/6653/2626/651/9315/23090/1149/93649/7040/8425/654/9350/27302/203100/3624/1311/3172/6422/2662/390598/91851/9573/402117/269/860/6262/650/170261/25928/8646/94031/64388/50515/375567/2660/124857/147409/2200/4015/9241/3625/168667/94/375387/7042/3547/655/653/5046/121551/4920/2254/8516/26585/65…
272	group_GSEA_Go_BP.csv	GO:0032411	GO:0032411	positive regulation of transporter activity	109	-0.55123	-1.18273	0.037962	0.259893	0.227983	5613	tags=51%, list=30%, signal=36%	246329/1080/1815/5174/65268/7114/65018/84766/57158/65267/9992/10368/3458/5649/481/30845/287/65266/6769/10142/3767/440699/288/9143/3747/3746/88/10345/388591/5031/27092/342667/5444/844/9001/4923/3736/644139/9472/23237/3359/2048/6262/10110/729230/2946/54209/389816/10369/1520/10008/482/6347/51083/126755/7225
273	group_GSEA_Go_BP.csv	GO:0043200	GO:0043200	response to amino acid	110	-0.551283	-1.18336	0.038961	0.263676	0.231301	3600	tags=26%, list=19%, signal=21%	1051/83667/6935/440/6506/7124/1291/143686/1956/158376/6750/222545/441509/5156/1290/8001/53335/2695/2902/26291/1906/445/2155/1277/5105/1281/1278/5764/7494
274	group_GSEA_Go_BP.csv	GO:0045667	GO:0045667	regulation of osteoblast differentiation	110	-0.551626	-1.1841	0.038961	0.263676	0.231301	3086	tags=29%, list=16%, signal=24%	8626/2201/202151/7124/6096/3082/374/1050/654/3199/8074/117581/3569/6422/2662/860/3488/650/8646/64093/7477/9241/655/63923/2263/8519/26585/4745/6423/344901/338773/6664
275	group_GSEA_Go_BP.csv	GO:0035107	GO:0035107	appendage morphogenesis	147	-0.551877	-1.1904	0.017982	0.175973	0.154367	3929	tags=32%, list=21%, signal=25%	91461/9496/8323/4621/341640/5727/3205/7700/80144/2255/3227/7483/340419/8626/2201/6662/5087/2736/57167/5362/10512/60529/5125/7704/860/7476/100131390/50515/130497/1382/27164/5307/257/9241/2697/5396/7042/655/2263/4920/2254/5915/6910/6423/775/7021/6664
276	group_GSEA_Go_BP.csv	GO:0035108	GO:0035108	limb morphogenesis	147	-0.551877	-1.1904	0.017982	0.175973	0.154367	3929	tags=32%, list=21%, signal=25%	91461/9496/8323/4621/341640/5727/3205/7700/80144/2255/3227/7483/340419/8626/2201/6662/5087/2736/57167/5362/10512/60529/5125/7704/860/7476/100131390/50515/130497/1382/27164/5307/257/9241/2697/5396/7042/655/2263/4920/2254/5915/6910/6423/775/7021/6664
277	group_GSEA_Go_BP.csv	GO:0001655	GO:0001655	urogenital system development	329	-0.551952	-1.20546	0.000999001	0.0293189	0.0257191	4552	tags=39%, list=24%, signal=30%	247/1396/65250/65266/3248/2303/9096/26249/9863/50484/5629/51804/7422/55366/8829/793/2043/4763/9245/7482/2294/9510/7380/9420/7481/5979/186/1286/5727/5076/4811/80144/2247/2255/10220/3227/3911/768239/5324/9370/8626/84662/6662/2049/4868/5087/10481/170690/2736/5950/255738/10409/7161/2625/384/9788/93649/367/7484/8549/7040/28514/654/5156/9350/59/7475/1285/100133941/2650/5125/2028/7704/6422/2138/1634/204…
278	group_GSEA_Go_BP.csv	GO:0015849	GO:0015849	organic acid transport	328	-0.552221	-1.20587	0.000999001	0.0293189	0.0257191	4156	tags=35%, list=22%, signal=28%	5244/4763/5027/3766/113235/5997/151473/8564/846/6519/89874/348932/186/552/6538/6505/5205/28234/6540/9058/5468/65012/83884/54716/6579/5020/64849/338821/6506/2350/885/347411/8600/388662/140679/6754/59272/157724/23428/1645/9121/6616/56301/284111/146167/84647/28965/4923/114571/2352/8529/201780/84889/80131/57030/3933/246213/11001/387700/9971/6539/115111/6857/4889/7223/9256/10599/7200/80763/5320/1813/1…
279	group_GSEA_Go_BP.csv	GO:0046942	GO:0046942	carboxylic acid transport	328	-0.552221	-1.20587	0.000999001	0.0293189	0.0257191	4156	tags=35%, list=22%, signal=28%	5244/4763/5027/3766/113235/5997/151473/8564/846/6519/89874/348932/186/552/6538/6505/5205/28234/6540/9058/5468/65012/83884/54716/6579/5020/64849/338821/6506/2350/885/347411/8600/388662/140679/6754/59272/157724/23428/1645/9121/6616/56301/284111/146167/84647/28965/4923/114571/2352/8529/201780/84889/80131/57030/3933/246213/11001/387700/9971/6539/115111/6857/4889/7223/9256/10599/7200/80763/5320/1813/1…
280	group_GSEA_Go_BP.csv	GO:0072009	GO:0072009	nephron epithelium development	109	-0.552355	-1.18515	0.037962	0.259893	0.227983	5627	tags=54%, list=30%, signal=38%	2668/7827/10736/56998/30812/153572/4208/54806/2296/3611/652/6469/2719/65266/2303/26249/9863/51804/7422/55366/793/7482/7481/186/5727/5076/2247/3911/9370/6662/4868/5087/170690/10409/2625/9788/7484/7040/28514/7475/100133941/2138/7490/5175/80000/55083/26508/8642/650/2246/130497/7477/9241/5420/3237/183/3975/7021/7471
281	group_GSEA_Go_BP.csv	GO:0010959	GO:0010959	regulation of metal ion transport	375	-0.552474	-1.208	0.000999001	0.0293189	0.0257191	4484	tags=36%, list=24%, signal=28%	65266/6546/3759/6769/3784/10142/8832/201140/100507027/3383/5270/5027/283229/286183/440699/846/6406/7779/288/353514/57731/945/3747/859/774/3746/2645/799/5023/88/2257/10345/154215/7349/6331/4638/2273/5349/4846/388591/1950/5031/776/53822/79570/342667/126306/57520/255738/57338/2916/3787/785/3356/7040/844/5957/9001/187/6330/4923/64805/57214/815/30820/117531/3736/9472/5318/816/6262/486/5743/4283/55800/…
282	group_GSEA_Go_BP.csv	GO:0061041	GO:0061041	regulation of wound healing	135	-0.552484	-1.1899	0.023976	0.207247	0.181801	3447	tags=29%, list=18%, signal=24%	2247/2266/3848/2152/4638/4846/90102/83481/130120/2039/5068/158376/84830/3273/325/5156/170692/10630/18/5328/5054/2207/2191/2697/1906/5155/150/7035/64094/6850/710/55966/2155/7056/2150/5055/948/3170/7494
283	group_GSEA_Go_BP.csv	GO:0035051	GO:0035051	cardiocyte differentiation	143	-0.552624	-1.19252	0.01998	0.184642	0.161972	4285	tags=32%, list=23%, signal=25%	5629/7422/7478/5997/8324/26011/186/859/127294/10529/88/9172/148/8048/2626/1956/50507/10512/4607/93649/7040/28514/5156/54345/27302/9472/7490/64321/650/4892/376132/1906/183/7412/7042/655/5999/5159/5915/6910/84700/115701/26585/4604/137814/1482
284	group_GSEA_Go_BP.csv	GO:0007498	GO:0007498	mesoderm development	130	-0.552641	-1.18882	0.028971	0.23039	0.202103	5308	tags=42%, list=28%, signal=31%	7473/10370/1969/2296/2260/6862/23135/23414/268/652/6469/83881/22806/2303/7422/3717/2294/7481/2114/728395/5076/3690/10220/3055/8626/642658/3673/8091/100506013/6899/9350/3624/2138/3196/9573/64321/8646/130497/728137/7075/660/84667/9241/100289087/655/2263/64591/6398/7258/6939/3975/8516/2139/6423/57057
285	group_GSEA_Go_BP.csv	GO:0099565	GO:0099565	chemical synaptic transmission, postsynaptic	105	-0.552684	-1.18447	0.03996	0.26573	0.233104	2543	tags=30%, list=14%, signal=26%	5023/266743/1143/1141/2898/9162/4988/1137/4887/441509/4923/57030/112755/8973/8001/22941/50944/7476/2902/1813/5026/18/2906/9699/5999/1134/2904/9378/81832/57502/55584/22999
286	group_GSEA_Go_BP.csv	GO:0032635	GO:0032635	interleukin-6 production	145	-0.553069	-1.1933	0.01998	0.184642	0.161972	3600	tags=34%, list=19%, signal=28%	353514/23586/1051/27179/5603/3557/7349/8807/27178/3071/2693/56300/4345/7124/3082/6504/338322/51311/84639/3606/3635/53342/7292/51284/3569/9971/90865/10417/5004/671/2207/4843/284194/54209/64127/114900/84632/6850/26191/11213/7097/2069/114899/2150/4023/26525/948/27177/3553/7494
287	group_GSEA_Go_BP.csv	GO:0099177	GO:0099177	regulation of trans-synaptic signaling	432	-0.553074	-1.2106	0.000999001	0.0293189	0.0257191	4185	tags=34%, list=22%, signal=27%	793/152330/5270/2043/4763/3766/4130/6855/1524/8564/7779/6623/11346/2895/2982/774/6543/26045/57449/5023/266743/321/1143/6853/7349/590/1141/25837/9066/5020/148/9370/392862/575/2898/2693/6900/91683/776/7124/112476/27092/1956/1607/1268/627/57338/2918/8938/4803/10874/1949/9162/5334/1630/1137/2916/6616/27345/3356/339302/9746/9515/4761/3745/5865/4887/5582/5030/9001/4923/815/143425/112755/9627/1395/43/68…
288	group_GSEA_Go_BP.csv	GO:0050663	GO:0050663	cytokine secretion	225	-0.553108	-1.20156	0.001998	0.0457645	0.0401455	5099	tags=43%, list=27%, signal=32%	51744/10626/3458/7128/2335/23705/192683/260434/9466/8651/2268/100431172/247/64135/5600/373509/5734/55366/26253/5027/79679/81793/112744/7100/353514/55612/23586/186/7133/27159/2213/115362/59082/6346/284297/1401/79400/5005/834/3694/440068/7850/2693/4345/1116/7124/9636/29126/338322/2625/384/51311/1149/9447/6288/22861/5008/9971/335/90865/152138/56253/114769/7293/5004/1813/4843/2219/284194/338557/6348/…
289	group_GSEA_Go_BP.csv	GO:0070252	GO:0070252	actin-mediated cell contraction	110	-0.553159	-1.18739	0.034965	0.251833	0.220913	4722	tags=41%, list=25%, signal=31%	4632/7135/287/7169/58/3759/3784/29119/4620/4621/859/88/2257/7139/6331/388591/8913/4634/3762/3728/3764/7125/776/2626/1824/4607/7111/1674/6330/6323/5318/6262/3760/55800/6327/10630/3757/477/2697/23704/10008/6781/4604/775/5350
290	group_GSEA_Go_BP.csv	GO:0007626	GO:0007626	locomotory behavior	198	-0.553185	-1.19911	0.00599401	0.0941182	0.0825623	4314	tags=36%, list=23%, signal=28%	5071/551/51168/793/2043/3766/10882/1803/6623/57731/390259/1600/774/340990/55079/2257/7080/321/1143/8997/1141/2693/6900/111/1621/23284/2571/57626/1949/4988/7111/1137/2916/6616/58524/3218/4887/4923/9293/6323/7200/84152/2695/163175/2902/1813/1812/1394/84189/18/2906/80243/54112/7345/477/1826/6531/5179/7143/3751/1392/460/5153/56924/114/6387/6414/3620/3170/23544/3358
291	group_GSEA_Go_BP.csv	GO:0051897	GO:0051897	positive regulation of protein kinase B signaling	163	-0.553188	-1.19639	0.00599401	0.0941182	0.0825623	3697	tags=34%, list=20%, signal=28%	5979/2261/558/799/2066/2247/2255/1646/2152/1950/1116/8600/7124/3082/374/1956/50507/2252/3481/8644/2625/388121/3606/7066/7040/2251/5156/642273/64805/7039/8074/5008/3059/5880/118788/255324/79727/389400/3488/2246/85453/9365/6348/5155/7010/2263/2250/2254/4653/5159/2069/284/2155/5294/10268/1440
292	group_GSEA_Go_BP.csv	GO:0019722	GO:0019722	calcium-mediated signaling	213	-0.553265	-1.20039	0.001998	0.0457645	0.0401455	4579	tags=38%, list=24%, signal=29%	22859/287/5788/51554/6546/4773/6014/1827/5027/1907/1524/576/566/51778/283455/1672/10231/552/10345/1235/10316/2494/1234/5031/8600/7124/6364/2039/1956/126306/57338/3576/2833/1233/2829/168620/222545/201191/643/4761/844/9001/64805/7535/9472/683/6262/729230/2902/5026/6401/2906/1193/2946/477/54209/185/6348/3579/1906/56923/7412/920/4842/84502/6850/57007/2633/9034/1232/3357/4776/55273/2358/2904/775/1012/…
293	group_GSEA_Go_BP.csv	GO:0050804	GO:0050804	modulation of chemical synaptic transmission	431	-0.553321	-1.21087	0.000999001	0.0293189	0.0257191	4185	tags=35%, list=22%, signal=27%	793/152330/5270/2043/4763/3766/4130/6855/1524/8564/7779/6623/11346/2895/2982/774/6543/26045/57449/5023/266743/321/1143/6853/7349/590/1141/25837/9066/5020/148/9370/392862/575/2898/2693/6900/91683/776/7124/112476/27092/1956/1607/1268/627/57338/2918/8938/4803/10874/1949/9162/5334/1630/1137/2916/6616/27345/3356/339302/9746/9515/4761/3745/5865/4887/5582/5030/9001/4923/815/143425/112755/9627/1395/43/68…
294	group_GSEA_Go_BP.csv	GO:1901342	GO:1901342	regulation of vasculature development	307	-0.553322	-1.2073	0.000999001	0.0293189	0.0257191	3296	tags=29%, list=18%, signal=24%	5468/1942/3848/51378/2152/4846/27286/575/2693/3728/1116/8091/2626/3082/3135/23462/54567/9982/2321/100506013/958/3576/4881/7498/93649/126259/10266/3273/28514/146850/187/1215/1285/3569/6422/1634/7424/6369/5617/7490/2828/11005/5743/729230/8710/2246/57608/10563/5054/7075/6356/5740/168667/185/84432/3579/5155/183/94/285/7010/7042/655/51666/64094/3627/79924/90993/2254/5196/1232/306/358/7101/718/5579/641…
295	group_GSEA_Go_BP.csv	GO:0009581	GO:0009581	detection of external stimulus	130	-0.553469	-1.1906	0.027972	0.225908	0.198171	4993	tags=43%, list=27%, signal=32%	5132/79955/133060/63895/6295/2979/58473/54437/778/5270/5158/2294/2978/80036/79054/859/51761/23746/8048/2792/3728/10002/3673/84059/6010/3249/2916/3356/55107/5957/4923/9293/117531/2780/3736/23596/6323/8989/1301/644168/2793/94233/5475/3000/1259/24/63982/54112/1258/6121/40/50508/6387/221391/4914/55584
296	group_GSEA_Go_BP.csv	GO:0010923	GO:0010923	negative regulation of phosphatase activity	102	-0.553591	-1.18513	0.043956	0.27652	0.242569	3149	tags=22%, list=17%, signal=18%	3071/7124/90853/151242/27328/5502/57662/116154/284257/153743/114783/114794/60385/84152/392617/153769/7042/94274/83987/80034/5764/121256
297	group_GSEA_Go_BP.csv	GO:0030073	GO:0030073	insulin secretion	204	-0.553809	-1.20122	0.002997	0.0595489	0.0522375	4314	tags=33%, list=23%, signal=26%	5071/23568/3717/2696/3767/640/846/1803/5991/27445/3747/2645/3557/1946/4760/222546/9066/2693/111/776/7124/5950/57393/1268/2822/8938/389692/6616/9515/55107/3745/54097/5798/143425/3172/6422/9971/2850/7200/6833/2695/6755/1813/773/6352/7447/18/57818/4843/3625/2697/9699/150/2641/6514/1392/51083/7425/169026/114/11069/4160/775/7021/2740/5799/3553/3170
298	group_GSEA_Go_BP.csv	GO:1901343	GO:1901343	negative regulation of vasculature development	112	-0.553831	-1.1899	0.032967	0.24444	0.214428	3296	tags=29%, list=18%, signal=24%	5468/51378/575/3135/54567/4881/7498/3273/1285/1634/5617/7490/2828/11005/729230/5054/7075/5155/183/285/7010/7042/655/3627/90993/2254/5196/641700/4879/9723/23213/4223/5764
299	group_GSEA_Go_BP.csv	GO:0042136	GO:0042136	neurotransmitter biosynthetic process	96	-0.554054	-1.18405	0.048	0.292355	0.25646	5481	tags=48%, list=29%, signal=34%	493/2185/54/3586/3458/1545/121278/10394/6095/6507/64581/5053/51733/3717/1191/3383/60482/1524/747/186/6582/4846/22914/7124/1621/2571/384/2572/43/64902/5743/1103/3067/18/4843/5740/1906/183/6531/445/26002/4842/5806/100528032/948/3553
300	group_GSEA_Go_BP.csv	GO:0007269	GO:0007269	neurotransmitter secretion	167	-0.554649	-1.2002	0.00799201	0.114228	0.100203	4314	tags=38%, list=23%, signal=29%	5071/440279/4763/5027/6854/60482/6855/8564/7779/6623/27445/774/6582/5023/321/1143/6853/1141/9066/148/91683/776/6861/9379/112476/140679/2571/26059/1268/8938/9162/1137/6616/27345/3356/339302/9515/2572/8618/5582/5030/815/143425/112755/9627/6857/8973/9256/7476/1103/1813/1812/6536/9699/1129/6572/23025/3351/5579/9900/9378/5799/22999
301	group_GSEA_Go_BP.csv	GO:0006690	GO:0006690	icosanoid metabolic process	104	-0.554926	-1.18822	0.037962	0.259893	0.227983	5018	tags=46%, list=27%, signal=34%	1545/241/10394/5319/1579/247/3248/728226/551/6916/246/91227/92086/1907/1555/747/10464/552/2166/5730/1646/4051/5444/66002/8644/158584/1544/8529/126410/59344/9536/11283/29785/158833/5446/1559/5743/255189/5322/5740/1906/50487/2687/6850/1558/7097/5742/3553
302	group_GSEA_Go_BP.csv	GO:0022600	GO:0022600	digestive system process	99	-0.554975	-1.18734	0.041958	0.272916	0.239407	4484	tags=39%, list=24%, signal=30%	65266/3784/55765/9245/113235/80168/8435/1133/56667/2255/7349/4760/887/5020/2693/6662/6518/5950/10874/1645/1131/5731/6779/115111/335/3274/5733/7032/64127/150/6514/1392/358/337/6523/5406/948/12/6863
303	group_GSEA_Go_BP.csv	GO:0032368	GO:0032368	regulation of lipid transport	105	-0.555188	-1.18984	0.038961	0.263676	0.231301	3850	tags=39%, list=21%, signal=31%	5244/5027/158219/186/5727/51761/3690/1071/7349/57540/5468/5020/9370/5360/1950/8600/5444/6754/255738/26154/9619/654/4923/6696/8529/335/5443/2587/341/1394/344/185/1906/183/6850/1392/51083/337/5972/3553/6863
304	group_GSEA_Go_BP.csv	GO:0050707	GO:0050707	regulation of cytokine secretion	195	-0.555274	-1.20246	0.003996	0.0732048	0.0642167	5099	tags=44%, list=27%, signal=32%	51744/10626/3458/7128/2335/23705/192683/260434/9466/8651/2268/247/64135/5600/373509/5734/55366/26253/5027/79679/81793/112744/7100/353514/55612/23586/186/7133/27159/2213/59082/6346/284297/1401/5005/834/440068/7850/2693/4345/7124/29126/338322/2625/384/51311/1149/9447/6288/22861/5008/9971/335/90865/152138/56253/114769/7293/5004/1813/2219/284194/338557/6348/9173/64127/114900/6850/26191/2633/7097/2360…
305	group_GSEA_Go_BP.csv	GO:0050830	GO:0050830	defense response to Gram-positive bacterium	92	-0.555285	-1.18518	0.049	0.29568	0.259377	5675	tags=46%, list=30%, signal=32%	1673/114770/57151/54/4069/3906/1969/84868/114771/4049/129530/820/9466/5319/387695/2268/57115/389852/3929/5027/1672/353142/284297/1401/22914/130120/7124/6039/1755/163351/3569/115361/5919/5320/1511/2634/131375/944/7097/114548/100528032/948
306	group_GSEA_Go_BP.csv	GO:0002040	GO:0002040	sprouting angiogenesis	112	-0.555369	-1.19321	0.031968	0.240351	0.210841	5547	tags=48%, list=30%, signal=34%	6915/375056/9037/2185/10769/10000/147372/4017/3586/2624/1969/2324/1960/652/2277/3678/2303/7422/8829/25960/79812/26051/2247/27286/161198/2693/54567/9982/2321/100506013/2822/84830/10266/28514/187/7424/441478/5743/9353/2246/57608/168667/185/11082/94/7010/90993/284/7101/26585/84870/9723/1012/4223
307	group_GSEA_Go_BP.csv	GO:0042303	GO:0042303	molting cycle	110	-0.555411	-1.19222	0.02997	0.233882	0.205166	4948	tags=43%, list=26%, signal=32%	55504/85291/147495/2304/6469/162514/94234/5154/3868/55366/10848/3872/4763/8323/55612/8643/2255/3890/3911/8626/10468/3889/6662/7124/26018/1956/8456/2252/8549/60529/54345/1001/3624/3488/11005/5743/25928/80326/147409/7042/100132386/2263/196264/51083/3884/728224/9079
308	group_GSEA_Go_BP.csv	GO:0042633	GO:0042633	hair cycle	110	-0.555411	-1.19222	0.02997	0.233882	0.205166	4948	tags=43%, list=26%, signal=32%	55504/85291/147495/2304/6469/162514/94234/5154/3868/55366/10848/3872/4763/8323/55612/8643/2255/3890/3911/8626/10468/3889/6662/7124/26018/1956/8456/2252/8549/60529/54345/1001/3624/3488/11005/5743/25928/80326/147409/7042/100132386/2263/196264/51083/3884/728224/9079
309	group_GSEA_Go_BP.csv	GO:0001505	GO:0001505	regulation of neurotransmitter levels	341	-0.555486	-1.21395	0.000999001	0.0293189	0.0257191	4444	tags=38%, list=24%, signal=29%	8447/5053/51733/5071/440279/3717/1191/3383/4763/5027/6854/3766/60482/6855/1524/5997/8564/747/55349/7779/6623/10003/3177/27445/9143/186/774/6582/5023/6538/6505/321/1143/3690/6853/590/1141/9066/4846/148/22914/91683/6506/4128/26227/776/7124/6861/9379/1621/112476/140679/2571/26059/1268/8938/8292/9162/2555/384/1137/6616/2731/27345/3356/339302/9515/29958/2572/8618/5865/145270/5582/5030/4923/1757/1807/8…
310	group_GSEA_Go_BP.csv	GO:0007268	GO:0007268	chemical synaptic transmission	691	-0.555546	-1.21729	0.000999001	0.0293189	0.0257191	4185	tags=36%, list=22%, signal=29%	793/152330/5270/2043/4763/5027/6854/3766/60482/4130/6855/1145/1524/8564/2556/7779/2568/6623/11346/2895/27445/56123/1133/56132/2982/774/6543/26045/56122/6582/2559/57449/5023/9899/2257/6505/285242/22987/266743/57468/5173/3786/321/1143/6853/7349/2561/79608/590/1141/341359/25837/9066/5020/148/9370/392862/8913/575/2898/27115/2693/6900/91683/6506/2570/776/7124/6861/9379/1621/56125/112476/27092/390154/1…
311	group_GSEA_Go_BP.csv	GO:0098916	GO:0098916	anterograde trans-synaptic signaling	691	-0.555546	-1.21729	0.000999001	0.0293189	0.0257191	4185	tags=36%, list=22%, signal=29%	793/152330/5270/2043/4763/5027/6854/3766/60482/4130/6855/1145/1524/8564/2556/7779/2568/6623/11346/2895/27445/56123/1133/56132/2982/774/6543/26045/56122/6582/2559/57449/5023/9899/2257/6505/285242/22987/266743/57468/5173/3786/321/1143/6853/7349/2561/79608/590/1141/341359/25837/9066/5020/148/9370/392862/8913/575/2898/27115/2693/6900/91683/6506/2570/776/7124/6861/9379/1621/56125/112476/27092/390154/1…
312	group_GSEA_Go_BP.csv	GO:0001935	GO:0001935	endothelial cell proliferation	139	-0.555625	-1.19698	0.017982	0.175973	0.154367	5539	tags=45%, list=30%, signal=32%	9037/3676/10000/4017/3586/2624/1969/4208/79805/64102/2260/7026/2324/1960/652/2277/51162/22846/5629/7422/8862/8829/4763/26051/2247/3690/5468/79400/2152/2693/7124/7857/54567/9982/2321/100506013/7498/654/187/7424/6369/5617/335/441478/650/57608/6356/168667/185/2697/5155/94/7010/7432/1232/6347/3357/6387/1012/10344/23213/7494
313	group_GSEA_Go_BP.csv	GO:0099537	GO:0099537	trans-synaptic signaling	699	-0.555815	-1.21867	0.000999001	0.0293189	0.0257191	4185	tags=36%, list=22%, signal=29%	793/152330/5270/2043/4763/5027/6854/3766/60482/4130/6855/1145/1524/8564/747/2556/7779/2568/6623/11346/2895/27445/56123/1133/56132/2982/774/6543/26045/56122/6582/2559/57449/5023/9899/2257/6505/285242/11141/22987/266743/57468/5173/3786/321/1143/6853/7349/2561/79608/590/1141/341359/25837/9066/5020/148/9370/392862/8913/575/2898/27115/2693/6900/91683/6506/2570/776/7124/6861/9379/1621/56125/112476/2709…
314	group_GSEA_Go_BP.csv	GO:0032409	GO:0032409	regulation of transporter activity	267	-0.55583	-1.21194	0.000999001	0.0293189	0.0257191	3706	tags=31%, list=20%, signal=26%	9143/3747/859/3746/88/2257/10345/5468/2273/5349/388591/5031/776/53822/27092/342667/126306/5444/57520/255738/57338/4988/3787/785/844/9001/6330/4923/3736/644139/9472/149111/23237/3359/2893/2890/2048/22941/6262/50944/486/4747/10110/729230/55800/2902/1813/6327/27091/2892/1394/130497/1193/2946/4318/477/54209/6236/59284/389816/2697/10369/150/1520/23704/4842/84502/10008/1392/482/6347/306/146395/59283/51…
315	group_GSEA_Go_BP.csv	GO:0099536	GO:0099536	synaptic signaling	705	-0.555834	-1.21835	0.000999001	0.0293189	0.0257191	4185	tags=35%, list=22%, signal=29%	793/152330/5270/2043/4763/5027/6854/3766/60482/4130/6855/1145/1524/8564/747/2556/7779/2568/6623/11346/2895/27445/56123/1133/56132/2982/774/6543/26045/56122/6582/2559/57449/5023/9899/2257/6505/285242/11141/22987/266743/57468/5173/3786/321/1143/6853/7349/2561/79608/590/1141/341359/25837/9066/5020/148/9370/392862/8913/575/2898/27115/2693/6900/91683/6506/2570/776/7124/6861/9379/1621/56125/112476/2709…
316	group_GSEA_Go_BP.csv	GO:0090276	GO:0090276	regulation of peptide hormone secretion	205	-0.555887	-1.20609	0.002997	0.0595489	0.0522375	4314	tags=34%, list=23%, signal=27%	5071/23568/8862/3717/2696/3767/640/846/1803/91608/5991/3747/2645/7349/2266/1946/8997/4760/222546/9066/2693/111/776/8600/7124/1956/5950/57393/1268/2822/8938/10874/6616/9515/55107/3745/143425/3172/2691/6422/9971/2850/7200/6833/2695/6755/1813/773/6352/7447/18/57818/4843/3625/2697/150/2641/2865/6514/1392/169026/114/11069/775/7021/2740/3814/3553/3170/3358
317	group_GSEA_Go_BP.csv	GO:0048640	GO:0048640	negative regulation of developmental growth	104	-0.556144	-1.19083	0.035964	0.253655	0.222511	4453	tags=35%, list=24%, signal=27%	5600/54437/10500/8829/5997/8835/2261/859/5727/56920/85407/5950/4133/10512/7161/10371/1630/6696/6422/2045/153/374946/51316/53335/2660/9241/2697/223117/5999/7143/6910/51083/4504/6423/9723/344901
318	group_GSEA_Go_BP.csv	GO:0010771	GO:0010771	negative regulation of cell morphogenesis involved in differentiation	97	-0.556257	-1.18871	0.045	0.280659	0.246199	4448	tags=35%, list=24%, signal=27%	54437/26052/10500/8829/2192/1600/56920/1946/1942/2039/4133/10512/1949/10371/1630/6696/7224/2045/3196/374946/4168/2048/84894/9353/25791/223117/7143/2633/7225/4776/10631/4504/9723/7070
319	group_GSEA_Go_BP.csv	GO:0060993	GO:0060993	kidney morphogenesis	94	-0.556766	-1.18914	0.042	0.272916	0.239408	5273	tags=51%, list=28%, signal=37%	30812/153572/54806/3611/652/6469/2719/65266/26249/51804/7422/55366/793/9245/7482/7481/186/5727/5076/80144/2247/2255/3911/6662/5087/170690/10409/2625/7484/7040/7475/2650/2138/7490/80000/55083/8642/650/2246/130497/7477/9241/3237/183/655/5159/3975/7471
320	group_GSEA_Go_BP.csv	GO:0032414	GO:0032414	positive regulation of ion transmembrane transporter activity	101	-0.556799	-1.19191	0.036963	0.257397	0.225794	5613	tags=52%, list=30%, signal=37%	246329/1080/1815/5174/65268/7114/65018/84766/57158/65267/9992/10368/3458/5649/481/30845/287/65266/6769/10142/3767/440699/288/3747/3746/88/10345/388591/5031/27092/342667/844/9001/4923/3736/644139/9472/23237/3359/2048/6262/729230/2946/54209/389816/10369/1520/10008/482/6347/51083/126755/7225
321	group_GSEA_Go_BP.csv	GO:1903034	GO:1903034	regulation of response to wounding	163	-0.556958	-1.20454	0.004995	0.0837585	0.0734746	3447	tags=28%, list=18%, signal=23%	2247/2266/3848/2152/4638/4846/90102/83481/130120/2039/5068/158376/84830/3273/325/5156/6696/170692/10630/18/4916/5328/5054/2207/11202/2191/2697/1906/5155/150/7035/7143/64094/6850/710/55966/2155/7056/2150/5055/948/146760/3170/5764/7494
322	group_GSEA_Go_BP.csv	GO:0001649	GO:0001649	osteoblast differentiation	204	-0.557162	-1.20849	0.000999001	0.0293189	0.0257191	3161	tags=27%, list=17%, signal=23%	340419/8626/2201/202151/7124/6096/3082/1291/2736/374/651/5745/3481/3486/1050/654/6696/3199/8074/117581/3569/6422/2662/43/860/3488/650/8646/148979/64093/7477/4015/9241/6348/2697/5179/655/63923/2263/90993/2254/4653/23601/8519/1277/1591/26585/4745/6423/22801/1462/344901/338773/3381/6664
323	group_GSEA_Go_BP.csv	GO:0048738	GO:0048738	cardiac muscle tissue development	206	-0.557283	-1.20911	0.001998	0.0457645	0.0401455	4477	tags=34%, list=24%, signal=27%	6546/27063/65009/5600/2303/5629/7422/10848/26281/7478/5997/8324/161882/26011/186/859/127294/10529/88/9172/2066/7139/2247/148/8048/4634/2626/50507/5950/54567/4607/7161/93649/7040/28514/5156/129446/27302/9472/7490/1301/5318/6262/650/4892/1901/376132/9241/2697/1906/183/7042/137868/655/653/5999/2263/2254/5159/5915/6910/84700/115701/26585/4036/4604/137814/5350/140628/1482/57057
324	group_GSEA_Go_BP.csv	GO:0060048	GO:0060048	cardiac muscle contraction	129	-0.557399	-1.19878	0.022977	0.202702	0.177814	4768	tags=40%, list=25%, signal=30%	8654/481/4632/30845/287/6546/3759/3784/29119/10848/5997/859/2257/7139/7349/6331/388591/148/8048/8913/4634/3762/3728/3764/776/2626/1824/59272/4607/6330/27302/6323/5318/6262/3760/55800/6327/3757/1193/2946/477/2697/23704/4842/10008/5294/6781/6336/10021/775/5350/1482
325	group_GSEA_Go_BP.csv	GO:0023061	GO:0023061	signal release	454	-0.557743	-1.2205	0.000999001	0.0293189	0.0257191	4314	tags=35%, list=23%, signal=28%	5071/23568/440279/8862/3717/4763/5027/6854/60482/2696/6855/3767/640/8564/846/1803/7779/91608/5991/6623/27445/3747/186/774/2645/6582/5023/321/1143/3557/6853/7349/2266/1946/8997/4760/222546/1141/9066/148/9370/2693/91683/111/776/8600/7124/6861/9379/112476/1956/140679/5950/57393/2571/26059/1268/2822/8938/10874/9162/4988/389692/2625/1137/6616/27345/3356/339302/9515/8425/2572/8618/55107/3745/5582/5030/…
326	group_GSEA_Go_BP.csv	GO:0048167	GO:0048167	regulation of synaptic plasticity	185	-0.557746	-1.20664	0.00599401	0.0941182	0.0825623	4265	tags=34%, list=23%, signal=26%	440279/793/152330/5270/2043/4763/3766/4130/6855/1524/11346/2895/6543/26045/266743/9066/392862/575/2898/6900/91683/112476/57338/9162/6616/4761/3745/815/1395/3274/23237/25769/2890/816/2048/1816/22941/50944/2695/5743/2902/1813/1812/1394/2906/10590/9699/183/7143/84502/1392/7101/57537/23025/440829/114/4776/6547/2904/81832/22999/5764
327	group_GSEA_Go_BP.csv	GO:0060326	GO:0060326	cell chemotaxis	290	-0.557927	-1.21634	0.000999001	0.0293189	0.0257191	3566	tags=33%, list=19%, signal=27%	57449/3680/6359/27179/1235/2247/6346/3557/1880/3672/27178/120425/3071/6357/22914/6374/6280/56300/1234/8600/6364/3082/7857/2321/3576/2833/1233/84639/2829/643/3273/5156/6360/9750/6288/284340/5880/3569/79148/6355/7424/6369/5197/5919/683/6289/3219/9353/729230/5473/4283/2246/8740/6352/10563/5054/6354/2207/9547/2660/6356/1901/4015/185/6348/3579/1906/5155/7412/7042/1908/6373/64094/6850/3627/57007/5159/9…
328	group_GSEA_Go_BP.csv	GO:0006937	GO:0006937	regulation of muscle contraction	158	-0.558025	-1.20585	0.00599401	0.0941182	0.0825623	4829	tags=44%, list=26%, signal=33%	5021/8654/481/7135/30845/9732/287/6546/3759/3784/10142/29119/1907/5997/2982/859/5023/7139/1143/7349/6752/6331/5020/388591/148/4634/2693/3728/3673/7125/2626/1824/59272/10874/4607/93649/844/4887/1131/27302/3778/6329/3736/10203/5318/6262/80763/5743/4608/6870/18/1193/2946/477/1906/56923/1129/1264/150/4842/10008/5294/6781/6336/6547/10021/775/5350/1482
329	group_GSEA_Go_BP.csv	GO:0034762	GO:0034762	regulation of transmembrane transport	545	-0.558082	-1.22259	0.000999001	0.0293189	0.0257191	3689	tags=32%, list=20%, signal=26%	3747/859/774/3746/3744/9424/9132/799/88/2257/10345/3786/60598/79400/6331/2273/5349/388591/9370/8913/3762/3754/6506/2688/3764/5031/776/7124/53822/27092/11280/342667/126306/1909/57520/255738/57338/53405/8911/348980/4988/6326/27133/3738/3787/54207/6335/785/7040/3745/844/9001/187/6330/4923/5458/1188/57214/3778/6329/30820/3763/3785/93107/55799/6332/117531/9022/3736/644139/9472/149111/23237/6323/3359/3…
330	group_GSEA_Go_BP.csv	GO:0042445	GO:0042445	hormone metabolic process	228	-0.558338	-1.21325	0.001998	0.0457645	0.0401455	3477	tags=33%, list=19%, signal=27%	405753/441282/125/866/1583/5122/1646/55809/1735/6783/7124/2672/5950/1082/7252/59272/8292/4803/10170/3294/8644/2625/1645/3249/158835/1586/5947/654/5156/1215/6696/195814/1544/5125/90527/2028/6817/43/50700/335/29785/216/5446/9256/54577/339761/3283/1559/650/1103/83539/3293/1511/1734/6447/1382/1636/1359/7173/1081/8912/653/5046/6121/54576/2865/3284/1392/1558/51083/5126/3290/5972/1381/27122/3553
331	group_GSEA_Go_BP.csv	GO:0042742	GO:0042742	defense response to bacterium	244	-0.558698	-1.21481	0.001998	0.0457645	0.0401455	4310	tags=37%, list=23%, signal=29%	389852/3929/245911/245930/26253/5027/6406/566/7100/1672/114132/100423062/602/353142/1051/284297/1401/85569/613211/6407/22914/575/6280/613210/130120/7124/6364/9636/5650/338322/10578/25818/1991/384/245936/646627/6039/338376/57379/1755/163351/6693/22861/117159/3569/115361/9971/6779/5919/245929/58985/5225/51316/10417/11005/5320/5473/671/10563/1511/5054/2207/2634/4843/3346/613209/149233/54209/131375/3…
332	group_GSEA_Go_BP.csv	GO:0009617	GO:0009617	response to bacterium	599	-0.558905	-1.22461	0.000999001	0.0293189	0.0257191	4896	tags=39%, list=26%, signal=30%	129530/57088/1594/820/2056/2277/9466/2719/5319/387695/245938/389643/2268/27250/4353/22806/4257/11238/941/3001/3248/27063/57115/57162/254827/5734/55765/389852/3929/54658/3717/245911/3383/55026/245930/26253/5027/8029/1524/8564/3656/7001/6406/566/7100/1672/114132/4939/100423062/3587/7133/602/353142/725/132299/2213/10561/1051/558/84419/27179/10345/115362/1118/2255/284297/3557/1401/54757/85569/353376/…
333	group_GSEA_Go_BP.csv	GO:0042476	GO:0042476	odontogenesis	132	-0.558927	-1.2026	0.018981	0.180734	0.158544	3398	tags=31%, list=18%, signal=26%	2255/54757/3911/6331/340419/8626/8600/2736/3714/5251/25818/6899/58524/7040/5156/7475/3624/1834/431707/9622/860/4982/650/25928/80326/258/130497/5054/1906/64919/7042/655/2263/10117/358/1277/11096/752014/6336/1278/9313
334	group_GSEA_Go_BP.csv	GO:0001708	GO:0001708	cell fate specification	98	-0.55917	-1.19614	0.035964	0.253655	0.222511	5047	tags=48%, list=27%, signal=35%	2260/10215/6862/54738/8022/6469/6657/9096/10297/8829/8324/26011/9496/429/5727/79923/5076/8643/5080/2247/6662/170825/2736/23040/30009/347853/167826/6899/367/63978/58524/6656/28514/54345/2138/64321/4916/4821/50945/63950/6910/6913/2139/6423/3170/10660/57057
335	group_GSEA_Go_BP.csv	GO:0042472	GO:0042472	inner ear morphogenesis	98	-0.559397	-1.19663	0.035964	0.253655	0.222511	5369	tags=47%, list=29%, signal=34%	10083/3638/5754/2624/2260/497189/79955/115908/133060/340784/1750/3198/1280/5629/51804/51168/8323/57822/9132/5076/51761/2255/6935/6662/26018/2736/5456/140469/2625/3249/6899/9750/2138/1301/2048/2487/84189/5396/7401/3167/2263/4920/2254/8516/55584/7471
336	group_GSEA_Go_BP.csv	GO:0098693	GO:0098693	regulation of synaptic vesicle cycle	110	-0.559573	-1.20116	0.024975	0.211068	0.185153	3548	tags=28%, list=19%, signal=23%	5023/321/6853/1141/148/776/1268/9162/1137/3356/9515/5865/5582/5030/815/57030/143425/112755/6857/8973/7476/1759/1813/1812/9699/1129/3351/5579/11069/9378/22999
337	group_GSEA_Go_BP.csv	GO:0022898	GO:0022898	regulation of transmembrane transporter activity	255	-0.559637	-1.2185	0.000999001	0.0293189	0.0257191	2930	tags=29%, list=16%, signal=25%	2273/5349/388591/5031/776/53822/27092/342667/126306/57520/255738/57338/4988/3787/785/844/9001/6330/4923/3736/644139/9472/149111/23237/3359/2893/2890/2048/22941/6262/50944/486/4747/729230/55800/2902/1813/6327/27091/2892/1394/130497/1193/2946/4318/477/54209/6236/59284/389816/2697/10369/150/1520/23704/4842/84502/10008/1392/482/6347/306/146395/59283/51083/440829/2891/126755/7225/2904/5350/81832/6588/…
338	group_GSEA_Go_BP.csv	GO:0009612	GO:0009612	response to mechanical stimulus	208	-0.559699	-1.21419	0.000999001	0.0293189	0.0257191	4477	tags=37%, list=24%, signal=28%	6546/58/27063/3759/5734/5270/5027/200539/7832/632/7100/7481/859/5727/3746/51761/7349/5468/93986/440/834/8048/6662/3728/642658/3673/1116/84059/5493/2626/9379/1956/958/943/3249/51311/3356/7040/8796/654/9750/51284/1634/117531/3736/6323/8989/1301/6262/5743/1813/8740/84189/63982/477/2697/1906/183/285/838/40/3627/358/1277/6387/4914/10631/50964/64220/1281/9378/3553/26047/55584/5764/623
339	group_GSEA_Go_BP.csv	GO:0050764	GO:0050764	regulation of phagocytosis	94	-0.559837	-1.1957	0.039	0.263676	0.231301	4555	tags=40%, list=24%, signal=31%	5788/1794/64581/11314/57118/246/566/725/2213/653509/5468/720/5657/3055/9066/3071/9370/3673/7124/717/7040/5582/729238/10326/335/2207/3560/54209/6850/55423/7097/5806/6347/2150/718/2358/948/3553
340	group_GSEA_Go_BP.csv	GO:0099643	GO:0099643	signal release from synapse	168	-0.559902	-1.21139	0.003996	0.0732048	0.0642167	4314	tags=38%, list=23%, signal=30%	5071/440279/4763/5027/6854/60482/6855/8564/7779/6623/27445/774/6582/5023/321/1143/6853/1141/9066/148/91683/776/6861/9379/112476/140679/2571/26059/1268/8938/9162/1137/6616/27345/3356/339302/9515/2572/8618/5582/5030/815/143425/112755/9627/6857/8973/9256/7476/1103/1813/1812/6536/9699/1129/6572/23025/148281/3351/5579/9900/9378/5799/22999
341	group_GSEA_Go_BP.csv	GO:0008593	GO:0008593	regulation of Notch signaling pathway	96	-0.56	-1.19675	0.039	0.263676	0.231301	3398	tags=28%, list=18%, signal=23%	2255/2620/221336/4846/8626/1950/170825/3714/23462/1956/54567/28514/1840/8788/79094/27255/441478/4100/64127/7042/56892/655/4854/375033/10631/140628/7471
342	group_GSEA_Go_BP.csv	GO:0050715	GO:0050715	positive regulation of cytokine secretion	133	-0.560004	-1.2055	0.018981	0.180734	0.158544	5163	tags=45%, list=28%, signal=33%	84868/51744/10626/3458/23705/192683/260434/2268/247/64135/5600/373509/5734/26253/5027/79679/112744/353514/55612/23586/186/27159/6346/5005/834/7124/29126/338322/2625/51311/9447/6288/22861/5008/90865/56253/5004/1813/2219/284194/6348/9173/64127/114900/6850/26191/7097/23601/114899/114548/3357/2150/4023/116337/10631/3552/55655/4321/3553/7494
343	group_GSEA_Go_BP.csv	GO:0015908	GO:0015908	fatty acid transport	96	-0.560147	-1.19707	0.039	0.263676	0.231301	2202	tags=29%, list=12%, signal=26%	5468/5020/8600/6754/84647/28965/4923/114571/8529/3933/11001/80763/5320/1813/255189/5322/1636/26279/6578/4843/391013/1906/56923/50487/6850/624/948/3553
344	group_GSEA_Go_BP.csv	GO:0048736	GO:0048736	appendage development	178	-0.56016	-1.21123	0.002997	0.0595489	0.0522375	5047	tags=43%, list=27%, signal=32%	2249/3236/2702/79412/2778/7473/140467/2260/7026/84133/8200/652/6469/2719/9464/1750/546/26160/65250/126695/1280/91461/9496/8323/4621/341640/5727/3205/7700/80144/2255/3227/3890/7483/340419/8626/2201/6662/642658/5087/2736/57167/8456/5362/10512/60529/5125/1311/7704/860/7476/100131390/50515/30062/130497/64093/1382/27164/5307/257/9241/2697/5396/7042/343637/655/2263/4920/2254/5915/6910/26585/6423/775/70…
345	group_GSEA_Go_BP.csv	GO:0060173	GO:0060173	limb development	178	-0.56016	-1.21123	0.002997	0.0595489	0.0522375	5047	tags=43%, list=27%, signal=32%	2249/3236/2702/79412/2778/7473/140467/2260/7026/84133/8200/652/6469/2719/9464/1750/546/26160/65250/126695/1280/91461/9496/8323/4621/341640/5727/3205/7700/80144/2255/3227/3890/7483/340419/8626/2201/6662/642658/5087/2736/57167/8456/5362/10512/60529/5125/1311/7704/860/7476/100131390/50515/30062/130497/64093/1382/27164/5307/257/9241/2697/5396/7042/343637/655/2263/4920/2254/5915/6910/26585/6423/775/70…
346	group_GSEA_Go_BP.csv	GO:0003231	GO:0003231	cardiac ventricle development	125	-0.560417	-1.20493	0.024975	0.211068	0.185153	5286	tags=44%, list=28%, signal=32%	10370/5754/5138/4193/4208/2296/4194/23414/652/9464/7135/65250/6604/2303/5629/10848/2294/161882/6586/7481/7139/6331/4846/4052/4634/2626/57167/23462/54567/10512/4607/2625/93649/7040/4887/129446/27302/4889/1301/5318/80000/6262/26508/9353/9241/7042/639/2263/6910/4036/6423/64220/1482/57057/6664
347	group_GSEA_Go_BP.csv	GO:0072358	GO:0072358	cardiovascular system development	679	-0.5605	-1.22813	0.000999001	0.0293189	0.0257191	3316	tags=28%, list=18%, signal=24%	80781/5468/3911/1942/3848/79400/51378/2152/57125/4638/4846/4052/27286/575/161198/2693/5787/2049/3728/10267/1950/1116/8091/2626/10481/3082/3135/23462/1909/7857/54567/8456/9982/2321/100506013/958/3576/2822/79652/2833/10512/84830/4881/6899/7498/93649/3606/2701/126259/7040/10266/3273/28514/146850/2251/5156/59/187/54345/1215/1285/5125/1296/2028/1311/1464/221981/284340/3569/6422/2138/1634/9047/255324/7…
348	group_GSEA_Go_BP.csv	GO:0032526	GO:0032526	response to retinoic acid	108	-0.560633	-1.2026	0.024975	0.211068	0.185153	4323	tags=40%, list=23%, signal=31%	346673/7478/472/8324/429/7481/5979/5727/5076/57795/5468/7483/5020/4656/6662/6096/5950/3294/6899/7484/2706/654/7475/3199/81029/9536/2707/11211/130497/4916/7075/7477/2697/4058/2263/5159/5915/358/1277/339479/1620/5105/205860
349	group_GSEA_Go_BP.csv	GO:0050900	GO:0050900	leukocyte migration	425	-0.56077	-1.22691	0.000999001	0.0293189	0.0257191	3587	tags=32%, list=19%, signal=26%	57126/3680/6359/27179/1235/6346/3690/3557/2993/1880/83483/51378/3672/5657/27178/3055/120425/3071/6357/22914/6374/6280/56300/4345/1234/51206/3673/8600/7124/119/6364/1621/7857/30009/2321/3576/326/2833/1991/2625/23428/84830/84639/56301/643/7040/58494/6693/3635/64805/6360/7535/9750/2650/6288/284340/5880/3569/79148/6383/6355/3554/2529/7424/6369/90865/5197/5919/683/7441/1084/5175/9353/729230/5473/4283/…
350	group_GSEA_Go_BP.csv	GO:0032612	GO:0032612	interleukin-1 production	103	-0.560931	-1.20115	0.031968	0.240351	0.210841	5374	tags=50%, list=29%, signal=36%	3965/54/3428/3586/84868/10626/3458/7128/54206/260434/64581/4210/373509/55765/3717/5027/1524/566/353514/945/149628/115362/59082/5005/834/440068/7850/2693/338322/384/51311/1215/9447/1903/6288/22861/9971/335/152138/114769/5004/56670/54209/6348/64127/114548/2150/4023/116337/55655/948/3553
351	group_GSEA_Go_BP.csv	GO:0009914	GO:0009914	hormone transport	316	-0.561002	-1.22525	0.000999001	0.0293189	0.0257191	3392	tags=29%, list=18%, signal=25%	3557/7349/2266/1946/8997/4760/222546/9066/9370/2693/111/776/8600/7124/1956/5950/57393/1268/2822/8938/10874/389692/2625/6616/9515/8425/55107/3745/654/54097/6696/114571/8074/3624/5008/5798/143425/3172/2691/3569/6422/9971/2850/5443/2587/7200/668/6833/2695/6755/1813/773/6352/1394/7447/18/6447/57818/4843/338557/3625/185/2697/1906/9699/183/150/7432/53919/2641/3589/1908/2865/6514/1392/114899/51083/7425/…
352	group_GSEA_Go_BP.csv	GO:0051924	GO:0051924	regulation of calcium ion transport	244	-0.561016	-1.21984	0.001998	0.0457645	0.0401455	4212	tags=34%, list=22%, signal=27%	201140/100507027/3383/5027/283229/846/6406/7779/353514/945/859/774/799/5023/10345/7349/4638/4846/1950/5031/776/342667/126306/57338/2916/785/7040/844/5957/9001/187/4923/64805/57214/815/117531/9472/816/6262/5743/4283/2902/1813/6352/1812/1394/5026/117/1193/196541/2946/477/6236/6348/2697/5155/183/150/9002/2641/5999/920/6373/115352/4842/84502/10008/3627/1392/5159/6347/57119/5294/7225/6387/6781/2847/10…
353	group_GSEA_Go_BP.csv	GO:0034767	GO:0034767	positive regulation of ion transmembrane transport	151	-0.561211	-1.21135	0.00699301	0.103924	0.0911642	5613	tags=50%, list=30%, signal=36%	246329/1080/1815/5174/3596/65268/7114/65018/90070/84766/3753/7220/57158/65267/57165/9992/10368/3458/5649/481/30845/287/65266/3759/6769/3784/10142/5027/3767/440699/288/3747/3746/799/88/10345/388591/5031/27092/342667/844/9001/187/4923/57214/3736/644139/9472/23237/3359/2048/6262/729230/4283/1812/3757/2946/54209/389816/10369/183/9002/1908/6373/1520/4842/10008/3627/482/6347/51083/126755/7225/10268/707…
354	group_GSEA_Go_BP.csv	GO:0031424	GO:0031424	keratinization	223	-0.561359	-1.21929	0.001998	0.0457645	0.0401455	5246	tags=48%, list=28%, signal=35%	3859/353145/440021/3856/3850/319101/85293/81872/353140/54474/1825/284827/85291/1041/3857/728299/3868/3886/6701/3855/3872/653240/81871/8689/43849/643418/3883/8688/3891/730755/3854/85294/353142/140807/6698/25984/337976/3890/3875/3848/353131/286887/3882/3889/3728/5493/1824/8687/23581/26154/337977/387273/25818/353132/337882/340654/3881/9119/1001/51350/6700/3887/337978/5266/3892/57830/81850/1828/6707/…
355	group_GSEA_Go_BP.csv	GO:0001938	GO:0001938	positive regulation of endothelial cell proliferation	92	-0.561504	-1.19846	0.039	0.263676	0.231301	5539	tags=47%, list=30%, signal=33%	9037/3676/10000/3586/2624/79805/2260/2324/1960/652/2277/51162/5629/7422/8862/8829/4763/26051/2247/3690/2152/2693/7857/9982/100506013/654/187/7424/6369/441478/650/57608/6356/185/5155/94/7010/7432/1232/3357/6387/1012/10344
356	group_GSEA_Go_BP.csv	GO:1901019	GO:1901019	regulation of calcium ion transmembrane transporter activity	86	-0.561794	-1.19693	0.041	0.268831	0.235824	2930	tags=26%, list=16%, signal=22%	5031/342667/126306/57338/785/844/9001/9472/6262/1813/1394/1193/2946/477/6236/150/4842/84502/10008/5350/6588/28954
357	group_GSEA_Go_BP.csv	GO:1905952	GO:1905952	regulation of lipid localization	135	-0.562084	-1.21058	0.012987	0.15157	0.13296	3850	tags=36%, list=21%, signal=28%	158219/440503/186/5727/51761/3690/1401/1071/7349/57540/5468/5020/9370/5360/1950/8600/7124/5444/6754/255738/26154/9619/1149/654/4923/6696/8529/3569/335/5443/2587/341/1394/344/185/1906/183/6850/1392/51083/337/718/4023/4481/5972/948/3553/6863
358	group_GSEA_Go_BP.csv	GO:0001944	GO:0001944	vasculature development	670	-0.562174	-1.23186	0.000999001	0.0293189	0.0257191	3316	tags=28%, list=18%, signal=24%	80781/5468/3911/1942/3848/79400/51378/2152/57125/4638/4846/4052/27286/575/161198/2693/5787/2049/3728/10267/1950/1116/8091/2626/10481/3082/3135/23462/1909/7857/54567/8456/9982/2321/100506013/958/3576/2822/79652/2833/10512/84830/4881/6899/7498/93649/3606/2701/126259/7040/10266/3273/28514/146850/2251/5156/59/187/54345/1215/1285/5125/1296/2028/1311/1464/221981/284340/3569/6422/2138/1634/9047/255324/7…
359	group_GSEA_Go_BP.csv	GO:0046883	GO:0046883	regulation of hormone secretion	262	-0.562269	-1.22476	0.000999001	0.0293189	0.0257191	3370	tags=30%, list=18%, signal=25%	7349/2266/1946/8997/4760/222546/9066/9370/2693/111/776/8600/7124/1956/5950/57393/1268/2822/8938/10874/6616/9515/55107/3745/654/6696/8074/3624/5008/143425/3172/2691/6422/9971/2850/5443/2587/7200/668/6833/2695/6755/1813/773/6352/1394/7447/18/6447/57818/4843/3625/185/2697/1906/183/150/7432/2641/3589/1908/2865/6514/1392/114899/51083/169026/114/11069/5972/775/7021/2740/3814/3553/3170/6664/3358/6863
360	group_GSEA_Go_BP.csv	GO:0072073	GO:0072073	kidney epithelium development	140	-0.562472	-1.21211	0.012987	0.15157	0.13296	5627	tags=53%, list=30%, signal=37%	2668/7827/10736/10252/56998/30812/153572/4208/54806/2296/2260/3611/652/6469/2719/65266/2303/26249/9863/51804/7422/55366/793/2043/7482/7481/5979/186/5727/5076/2247/10220/3911/9370/6662/4868/5087/170690/10409/2625/384/9788/7484/7040/28514/9350/7475/100133941/6422/2138/2045/7490/5175/80000/55083/26508/8642/650/9353/2246/130497/7477/9241/5420/168667/3237/3579/183/655/2263/5915/3975/7021/7471
361	group_GSEA_Go_BP.csv	GO:0032412	GO:0032412	regulation of ion transmembrane transporter activity	247	-0.562601	-1.22376	0.000999001	0.0293189	0.0257191	3198	tags=30%, list=17%, signal=25%	2273/5349/388591/5031/776/53822/27092/342667/126306/57520/255738/57338/4988/3787/785/844/9001/6330/4923/3736/644139/9472/149111/23237/3359/2893/2890/2048/22941/6262/50944/486/4747/729230/55800/2902/1813/6327/27091/2892/1394/130497/1193/2946/4318/477/54209/6236/59284/389816/10369/150/1520/23704/4842/84502/10008/1392/482/6347/306/146395/59283/51083/440829/2891/126755/7225/2904/5350/81832/6588/28954
362	group_GSEA_Go_BP.csv	GO:0007416	GO:0007416	synapse assembly	175	-0.56266	-1.2163	0.001998	0.0457645	0.0401455	4829	tags=46%, list=26%, signal=35%	5021/57408/23768/56127/56126/6712/5364/22859/6585/145581/347731/26052/9863/51804/23769/576/2895/27445/56123/56132/221935/26045/56122/94030/2066/11141/266743/1946/2561/1141/5020/27286/575/2693/2049/158038/9379/119/56125/23284/627/8292/2555/57717/387804/147381/9746/266977/54674/1007/2045/43/53942/2048/22941/50944/2596/7476/2902/1813/1812/84189/4916/4897/64084/4593/1826/54549/2554/40/999/7097/114798…
363	group_GSEA_Go_BP.csv	GO:0007156	GO:0007156	homophilic cell adhesion via plasma membrane adhesion molecules	167	-0.562842	-1.21793	0.002997	0.0595489	0.0522375	4690	tags=47%, list=25%, signal=36%	56127/56135/56126/56107/81607/57575/64405/8641/8832/28513/1005/29930/152330/84665/56100/5101/56103/56102/56123/56132/60437/5979/221935/56122/56111/56110/56104/10205/5098/56109/9708/6900/56108/56097/56125/56124/1824/56098/56128/27328/57717/9746/1007/54798/56101/56121/1001/54510/92211/1828/56129/65217/27255/56113/5175/128434/56112/8642/56114/56147/147409/64084/1016/1004/1823/1826/5100/54549/11122/6…
364	group_GSEA_Go_BP.csv	GO:0001822	GO:0001822	kidney development	277	-0.562878	-1.22696	0.000999001	0.0293189	0.0257191	4512	tags=39%, list=24%, signal=30%	65250/65266/3248/2303/26249/9863/50484/5629/51804/7422/55366/8829/793/2043/4763/9245/7482/9510/7380/7481/5979/186/1286/5727/5076/4811/80144/2247/2255/10220/3227/3911/9370/84662/6662/4868/5087/170690/2736/255738/10409/7161/2625/384/9788/7484/7040/28514/654/5156/9350/59/7475/1285/100133941/2650/5125/2028/7704/6422/2138/1634/2045/79727/7490/2828/5175/80000/55083/26508/8642/650/9353/8710/2246/130497/…
365	group_GSEA_Go_BP.csv	GO:0055065	GO:0055065	metal ion homeostasis	638	-0.562931	-1.2333	0.000999001	0.0293189	0.0257191	4338	tags=35%, list=23%, signal=28%	79689/5071/551/6338/492/3717/201140/1356/793/53940/5027/3766/5158/2696/30061/1907/344905/1524/3558/113235/846/10699/7779/11346/288/7380/2841/79054/186/859/6543/552/6005/55630/799/6359/5023/10345/1235/10161/2247/57468/2769/6346/54757/9170/79608/887/5020/6357/148/8048/6280/2898/9429/6261/1234/111/5031/496/776/8600/7052/730/1956/126306/1909/66002/1268/958/57338/728215/10874/2833/5745/6340/1233/1991/…
366	group_GSEA_Go_BP.csv	GO:0072001	GO:0072001	renal system development	292	-0.563005	-1.22745	0.000999001	0.0293189	0.0257191	4512	tags=40%, list=24%, signal=31%	65250/65266/3248/2303/9096/26249/9863/50484/5629/51804/7422/55366/8829/793/2043/4763/9245/7482/2294/9510/7380/7481/5979/186/1286/5727/5076/4811/80144/2247/2255/10220/3227/3911/9370/84662/6662/4868/5087/170690/2736/5950/255738/10409/7161/2625/384/9788/93649/7484/8549/7040/28514/654/5156/9350/59/7475/1285/100133941/2650/5125/2028/7704/6422/2138/1634/2045/79727/7490/64321/2828/5175/80000/55083/26508…
367	group_GSEA_Go_BP.csv	GO:0003014	GO:0003014	renal system process	116	-0.56336	-1.21068	0.025974	0.216015	0.189492	4484	tags=38%, list=24%, signal=29%	65266/3784/26249/551/50484/57835/10699/186/552/1143/1141/5020/148/9370/111/66002/8644/4881/361/8529/5125/3778/56302/80763/1813/56670/81285/9356/4645/185/2697/1906/5155/183/358/55959/2150/114/6781/4879/5972/7021/23213/6863
368	group_GSEA_Go_BP.csv	GO:0015718	GO:0015718	monocarboxylic acid transport	160	-0.563707	-1.218	0.003996	0.0732048	0.0642167	4226	tags=39%, list=23%, signal=30%	162515/5244/4763/5027/151473/846/186/6538/5205/28234/6540/5468/6579/5020/338821/347411/8600/140679/6754/1645/9121/84647/28965/4923/114571/8529/201780/3933/11001/387700/9971/6539/7223/10599/7200/80763/5320/1813/18/10991/255189/345274/5322/1636/26279/8714/6578/4843/391013/1906/56923/159963/50487/53919/6529/8647/6850/624/9900/64220/948/3553
369	group_GSEA_Go_BP.csv	GO:1904062	GO:1904062	regulation of cation transmembrane transport	326	-0.563715	-1.23107	0.000999001	0.0293189	0.0257191	2930	tags=28%, list=16%, signal=24%	5031/776/53822/27092/342667/126306/57520/255738/57338/4988/3787/785/7040/844/9001/187/6330/4923/57214/30820/117531/3736/644139/9472/149111/23237/2893/2890/2048/22941/6262/50944/486/4747/729230/4283/55800/2902/1813/6327/3792/1812/27091/2892/1394/130497/3757/1193/196541/2946/4318/477/54209/6236/59284/389816/10369/183/150/9002/5999/1908/6373/1520/23704/4842/84502/57628/10008/3627/1392/482/6347/306/1…
370	group_GSEA_Go_BP.csv	GO:0048644	GO:0048644	muscle organ morphogenesis	84	-0.563775	-1.19945	0.041041	0.268831	0.235824	3635	tags=31%, list=19%, signal=25%	127294/9172/7139/4638/4634/54567/4607/6899/7040/129446/27302/1301/5318/6262/5081/650/1901/9241/7042/2263/6939/4036/4604/1281/1482/57057
371	group_GSEA_Go_BP.csv	GO:0015893	GO:0015893	drug transport	211	-0.564014	-1.22364	0.000999001	0.0293189	0.0257191	4139	tags=39%, list=22%, signal=31%	3766/8029/113235/5997/6623/3047/1133/6005/6582/6505/5205/7349/83884/1141/341359/54716/9066/3045/64849/6947/2693/91683/6506/83546/2350/6861/388662/140679/390084/4151/1268/56918/84258/1137/3356/56301/284111/5865/4887/81693/4923/2352/84889/3046/3624/57030/143425/246213/387700/26034/6857/8973/2587/3050/80704/83447/1813/1812/6581/6570/18/10991/6536/477/2697/1906/3737/183/6531/5999/6511/1392/6512/358/5…
372	group_GSEA_Go_BP.csv	GO:0006814	GO:0006814	sodium ion transport	215	-0.564036	-1.22404	0.000999001	0.0293189	0.0257191	4170	tags=38%, list=22%, signal=30%	5270/5027/286183/60482/57835/84679/610/115584/200010/285335/288/57731/10568/6583/6328/859/6543/2257/154215/9058/6331/5349/4846/64849/64078/496/53822/79570/11280/57520/255738/6526/348980/6340/3775/6326/6335/7040/284111/146167/6524/6330/201780/6329/57030/6550/246213/55515/6332/480/6323/378807/25769/5318/284525/486/55800/1813/6327/10050/130497/10991/6557/345274/477/159963/40/8647/4842/55089/151258/4…
373	group_GSEA_Go_BP.csv	GO:0070374	GO:0070374	positive regulation of ERK1 and ERK2 cascade	199	-0.564348	-1.2231	0.000999001	0.0293189	0.0257191	3575	tags=38%, list=19%, signal=31%	26281/8829/2492/246/3383/56034/846/2261/799/6359/2066/2247/6346/2255/1880/2266/6357/148/389658/5031/1116/8600/7124/2626/6364/1956/50507/6504/6754/2321/100506013/4988/388121/3356/7066/7040/54550/5156/6360/8074/6355/6369/4889/650/5320/1813/6352/152007/6354/26291/5322/6356/338557/54209/168667/6348/5155/64127/7010/2641/920/2263/57007/26191/5159/284/6347/3357/2150/4914/10268/2358/4504/948/10344/3358
374	group_GSEA_Go_BP.csv	GO:0048771	GO:0048771	tissue remodeling	163	-0.564597	-1.22107	0.002997	0.0595489	0.0522375	5478	tags=47%, list=29%, signal=34%	7076/9607/2702/2185/171392/54/1969/4193/4208/2296/2324/115908/952/8200/7128/6694/4054/9464/3375/51208/2303/55366/10609/4763/5027/3558/632/1990/390259/186/3953/5340/558/3690/2255/9066/4846/8600/7052/1621/1956/50507/54567/10512/5745/53832/3606/7040/3273/6696/3635/5166/1464/5880/3569/6422/3200/1513/3488/4982/729230/1636/1901/2697/183/94/6850/3351/1943/26585/633/84870/3552/4160/338773/5764/81501
375	group_GSEA_Go_BP.csv	GO:0046879	GO:0046879	hormone secretion	306	-0.564802	-1.23217	0.000999001	0.0293189	0.0257191	3392	tags=30%, list=18%, signal=25%	3557/7349/2266/1946/8997/4760/222546/9066/9370/2693/111/776/8600/7124/1956/5950/57393/1268/2822/8938/10874/389692/2625/6616/9515/8425/55107/3745/654/54097/6696/8074/3624/5008/5798/143425/3172/2691/3569/6422/9971/2850/5443/2587/7200/668/6833/2695/6755/1813/773/6352/1394/7447/18/6447/57818/4843/338557/3625/185/2697/1906/9699/183/150/7432/2641/3589/1908/2865/6514/1392/114899/51083/7425/169026/114/11…
376	group_GSEA_Go_BP.csv	GO:0060419	GO:0060419	heart growth	86	-0.564908	-1.20357	0.038	0.259893	0.227983	4458	tags=36%, list=24%, signal=28%	65009/5600/2303/5629/26281/5997/26011/186/859/2066/2247/148/2626/5950/10409/7161/27302/9472/7490/1901/9241/2697/1906/183/7042/5999/2263/2254/6910/1482/57057
377	group_GSEA_Go_BP.csv	GO:0044057	GO:0044057	regulation of system process	572	-0.565211	-1.23837	0.000999001	0.0293189	0.0257191	3701	tags=33%, list=20%, signal=27%	2982/186/7133/859/774/6543/552/9424/5023/2257/6505/10345/7139/1143/2255/7349/6752/2266/60598/6331/4760/5020/5349/4846/388591/148/9370/8048/4656/8913/4634/2693/3762/6261/3728/400746/3673/7125/885/776/4868/53822/2626/170825/3082/1621/27092/11280/1956/1824/59272/100506013/10874/4607/3775/4988/10371/4881/93649/785/27345/3356/1674/844/7068/125111/4887/654/6330/4923/1131/5731/27302/3778/6329/3624/11275…
378	group_GSEA_Go_BP.csv	GO:0006721	GO:0006721	terpenoid metabolic process	120	-0.565563	-1.21579	0.017982	0.175973	0.154367	2759	tags=28%, list=15%, signal=24%	1956/5950/6010/10170/8644/1645/158835/5947/10082/195814/1544/6383/50700/335/5919/29785/216/54577/339761/1559/1208/24/1382/344/6121/54576/1392/1558/337/4023/4036/5406/64220/1381
379	group_GSEA_Go_BP.csv	GO:0034765	GO:0034765	regulation of ion transmembrane transport	466	-0.565897	-1.23842	0.000999001	0.0293189	0.0257191	3689	tags=34%, list=20%, signal=28%	3747/859/774/3746/3744/9424/9132/799/88/2257/10345/3786/60598/79400/6331/2273/5349/388591/8913/3762/3754/3764/5031/776/53822/27092/11280/342667/126306/57520/255738/57338/53405/8911/348980/4988/6326/27133/3738/3787/54207/6335/785/7040/3745/844/9001/187/6330/4923/1188/57214/3778/6329/30820/3763/3785/93107/55799/6332/117531/9022/3736/644139/9472/149111/23237/6323/3359/378807/2893/3768/3772/2890/2048…
380	group_GSEA_Go_BP.csv	GO:0050905	GO:0050905	neuromuscular process	106	-0.565948	-1.21309	0.022977	0.202702	0.177814	3681	tags=34%, list=20%, signal=27%	2895/4861/51761/2257/7349/111/112476/5881/57338/2173/9543/5458/1311/65217/2307/3736/6323/50944/4747/2902/1813/1812/84189/2906/54112/7345/7401/6531/5179/7143/84502/1134/6939/64478/64220/9378
381	group_GSEA_Go_BP.csv	GO:0098754	GO:0098754	detoxification	121	-0.566515	-1.2179	0.01998	0.184642	0.161972	3145	tags=28%, list=17%, signal=24%	4846/3045/6280/9429/7124/137902/257202/3046/6649/26034/4499/3050/5446/2880/64757/2878/5743/2947/2944/1193/2946/2882/4493/7173/655/4489/337/3240/84203/5742/4504/125336/948/7837
382	group_GSEA_Go_BP.csv	GO:0035725	GO:0035725	sodium ion transmembrane transport	139	-0.566758	-1.22096	0.00999001	0.132244	0.116007	3964	tags=35%, list=21%, signal=28%	84679/610/285335/288/10568/6328/859/6543/2257/6331/5349/64078/496/53822/11280/57520/255738/348980/6340/3775/6326/6335/6330/6329/57030/6550/55515/6332/480/6323/25769/284525/486/55800/6327/10050/130497/6557/477/40/8647/4842/482/51802/6336/6547/10021/81832/57419
383	group_GSEA_Go_BP.csv	GO:0006875	GO:0006875	cellular metal ion homeostasis	564	-0.566761	-1.24138	0.000999001	0.0293189	0.0257191	3686	tags=32%, list=20%, signal=26%	79054/186/859/6543/552/55630/799/6359/5023/10345/1235/10161/2247/2769/6346/9170/79608/887/5020/6357/148/8048/6280/2898/9429/6261/1234/111/5031/496/776/7052/730/126306/1909/1268/958/57338/728215/10874/2833/5745/1233/1991/2829/51310/3356/643/7040/844/4887/89885/5030/9001/654/5156/187/4923/5731/7224/100133941/1903/6288/7781/57214/3778/5330/9247/6355/2780/3777/4499/9472/480/25769/8989/2828/7223/2587/…
384	group_GSEA_Go_BP.csv	GO:0009582	GO:0009582	detection of abiotic stimulus	133	-0.56692	-1.22039	0.00999001	0.132244	0.116007	4993	tags=43%, list=27%, signal=32%	5132/79955/133060/63895/6295/2979/58473/54437/778/5270/5158/2978/80036/79054/859/51761/23746/8048/2792/3728/10002/3673/84059/6010/3249/2916/3356/55107/5957/4923/9293/117531/2780/3736/23596/6323/8989/1301/644168/2793/94233/5475/3000/1259/24/63982/54112/1258/6121/40/50508/6387/221391/4914/55584/10886/6863
385	group_GSEA_Go_BP.csv	GO:1904064	GO:1904064	positive regulation of cation transmembrane transport	139	-0.567024	-1.22154	0.00999001	0.132244	0.116007	5613	tags=52%, list=30%, signal=37%	246329/1815/5174/3596/65268/7114/65018/90070/84766/3753/7220/57158/65267/57165/9992/10368/3458/5649/481/30845/287/65266/3759/6769/3784/10142/3767/440699/288/3747/3746/799/88/10345/388591/5031/27092/342667/844/9001/187/4923/57214/3736/644139/9472/23237/2048/6262/729230/4283/1812/3757/2946/54209/389816/10369/183/9002/1908/6373/1520/4842/10008/3627/482/6347/51083/126755/10268/7070/623
386	group_GSEA_Go_BP.csv	GO:0048706	GO:0048706	embryonic skeletal system development	126	-0.567363	-1.2197	0.017982	0.175973	0.154367	4962	tags=44%, list=26%, signal=33%	4208/3231/6862/3214/652/1746/3213/6469/3198/3215/2303/1280/51804/579/4325/3216/10655/7481/3205/3227/7483/6935/642658/5087/5950/6899/7484/3218/60529/5156/3199/5125/2138/3200/3222/1301/860/5081/3219/50515/64131/130497/257/9241/5396/655/2263/2254/3975/1277/55959/6913/4188/3204/23213/6664
387	group_GSEA_Go_BP.csv	GO:0001568	GO:0001568	blood vessel development	643	-0.567524	-1.24306	0.000999001	0.0293189	0.0257191	3316	tags=28%, list=18%, signal=24%	80781/5468/3911/1942/3848/79400/51378/2152/57125/4638/4846/4052/27286/575/161198/2693/5787/2049/3728/10267/1950/1116/8091/2626/10481/3082/3135/23462/1909/7857/54567/8456/9982/2321/100506013/958/3576/2822/2833/10512/84830/4881/6899/7498/93649/3606/2701/126259/7040/10266/3273/28514/146850/2251/5156/59/187/54345/1215/1285/5125/1296/2028/1311/1464/221981/284340/3569/6422/2138/1634/9047/255324/7424/63…
388	group_GSEA_Go_BP.csv	GO:0015696	GO:0015696	ammonium transport	107	-0.568312	-1.21819	0.017982	0.175973	0.154367	4336	tags=44%, list=23%, signal=34%	57153/6006/5071/26281/60482/6623/1133/6583/6005/5023/3690/57127/1141/341359/9066/91683/6861/85413/390084/1268/84258/1137/3356/5865/4887/51458/143425/6857/8973/1437/1813/1812/6581/6570/18/2207/1906/3737/6531/4842/6850/6572/1392/358/148281/3351/6387
389	group_GSEA_Go_BP.csv	GO:0060415	GO:0060415	muscle tissue morphogenesis	78	-0.568351	-1.20912	0.045	0.280659	0.246199	3635	tags=37%, list=19%, signal=30%	27063/2303/5629/161882/127294/9172/7139/4638/4634/54567/4607/6899/7040/129446/27302/1301/5318/6262/5081/650/1901/9241/7042/2263/4036/4604/1281/1482/57057
390	group_GSEA_Go_BP.csv	GO:0043269	GO:0043269	regulation of ion transport	675	-0.568982	-1.24686	0.000999001	0.0293189	0.0257191	4484	tags=40%, list=24%, signal=31%	65266/6546/3748/3759/6769/3750/3784/10142/3769/8832/5071/551/778/26281/201140/100507027/3383/5270/5244/5027/3766/283229/286183/5997/3767/440699/8564/846/610/6406/7779/6623/285966/288/353514/6424/57731/6328/945/3747/186/859/774/3746/552/3744/9424/2645/1051/9132/799/51761/5023/88/2257/10345/154215/3786/3690/7349/60598/79400/6331/1141/341359/4638/2273/9066/5020/5349/4846/388591/8913/3762/91683/3754/…
391	group_GSEA_Go_BP.csv	GO:2000379	GO:2000379	positive regulation of reactive oxygen species metabolic process	95	-0.569304	-1.21631	0.028	0.225908	0.198171	3684	tags=34%, list=20%, signal=27%	186/57126/405753/1401/22914/575/7124/1956/50507/59272/8644/7498/7040/90527/64902/5743/2902/730249/11035/185/1906/5155/183/445/6850/5159/5806/2150/2358/100528032/948/3553
392	group_GSEA_Go_BP.csv	GO:1901616	GO:1901616	organic hydroxy compound catabolic process	73	-0.569416	-1.2098	0.048	0.292355	0.25646	3234	tags=30%, list=17%, signal=25%	55809/55586/1735/4128/6783/1621/4051/66002/197257/54363/8644/4923/8529/8074/6817/217/1734/6531/6822/26002/1591/4504
393	group_GSEA_Go_BP.csv	GO:0060078	GO:0060078	regulation of postsynaptic membrane potential	137	-0.569544	-1.2262	0.00999001	0.132244	0.116007	3567	tags=34%, list=19%, signal=28%	2559/5023/266743/1143/2561/1141/2898/2570/9162/2555/4988/1137/4887/441509/4923/57030/112755/153/3736/8973/401190/8001/2890/22941/50944/7476/2902/1813/2892/5026/18/2906/2569/9699/2557/5999/3751/2554/1134/2564/2899/2904/9378/81832/57502/55584/22999
394	group_GSEA_Go_BP.csv	GO:0017156	GO:0017156	calcium ion regulated exocytosis	151	-0.56974	-1.22976	0.002997	0.0595489	0.0522375	4145	tags=37%, list=22%, signal=29%	5027/6854/8941/6855/27445/5023/321/6853/1141/341359/9066/148/8913/91683/776/6861/112476/57393/26059/1268/8911/8938/84258/9162/1137/6616/3356/339302/9515/8618/85477/3745/5582/5030/57829/815/143425/112755/6857/8973/7476/1813/1812/9699/1129/150/8912/54586/55503/23025/148281/3351/5579/9900/11069/22999
395	group_GSEA_Go_BP.csv	GO:0006939	GO:0006939	smooth muscle contraction	105	-0.569916	-1.2214	0.018981	0.180734	0.158544	3701	tags=39%, list=20%, signal=32%	2982/5023/1143/6752/10316/1141/4638/5020/148/2693/3673/1909/10874/93649/80852/3356/4887/59/1131/3778/1311/10203/80763/5743/1813/1812/6870/18/5733/477/1906/56923/1129/1264/183/150/1908/55959/624/3357/23213
396	group_GSEA_Go_BP.csv	GO:0050679	GO:0050679	positive regulation of epithelial cell proliferation	184	-0.57005	-1.23317	0.000999001	0.0293189	0.0257191	4285	tags=38%, list=23%, signal=29%	5629/7422/8862/8829/4763/8324/9420/80139/26051/5076/2247/3690/2255/2152/6331/93986/120425/8626/2693/6662/130120/374/1956/7857/5068/9982/2252/100506013/3249/6899/367/7040/654/187/1001/7039/5798/6422/2138/255324/7424/6369/441478/7476/650/2246/57608/6352/130497/6356/9241/185/5155/64127/94/7010/7432/653/2263/2254/1232/3357/6387/4321/1012/10344/5764/6664/7494
397	group_GSEA_Go_BP.csv	GO:0030072	GO:0030072	peptide hormone secretion	247	-0.570176	-1.24024	0.000999001	0.0293189	0.0257191	4314	tags=35%, list=23%, signal=27%	5071/23568/8862/3717/2696/3767/640/846/1803/91608/5991/27445/3747/2645/3557/7349/2266/1946/8997/4760/222546/9066/2693/111/776/8600/7124/1956/5950/57393/1268/2822/8938/10874/389692/6616/9515/8425/55107/3745/54097/5798/143425/3172/2691/3569/6422/9971/2850/7200/6833/2695/6755/1813/773/6352/1394/7447/18/57818/4843/3625/2697/1906/9699/150/7432/2641/1908/2865/6514/1392/51083/7425/169026/114/11069/4160/…
398	group_GSEA_Go_BP.csv	GO:0072028	GO:0072028	nephron morphogenesis	78	-0.570227	-1.21311	0.04	0.26573	0.233104	5627	tags=56%, list=30%, signal=40%	2668/10736/56998/30812/153572/54806/3611/652/6469/2719/65266/26249/51804/7422/55366/7482/7481/186/5727/5076/2247/3911/6662/5087/170690/2625/7484/7040/7475/2138/7490/80000/55083/8642/650/2246/130497/9241/3237/183/655/5159/3975/7471
399	group_GSEA_Go_BP.csv	GO:0045778	GO:0045778	positive regulation of ossification	82	-0.570271	-1.2135	0.036036	0.253655	0.222511	3151	tags=30%, list=17%, signal=25%	5020/8626/2201/84059/3082/9636/7040/1050/654/7704/3569/860/650/130497/7477/9365/7042/655/8519/4745/6423/338773/5764/6664/6863
400	group_GSEA_Go_BP.csv	GO:0006941	GO:0006941	striated muscle contraction	165	-0.570391	-1.23389	0.000999001	0.0293189	0.0257191	4768	tags=42%, list=25%, signal=32%	8654/481/4632/7135/30845/287/6546/3759/6769/3784/29119/10848/5997/56203/4621/859/51761/2257/7139/7349/6331/92241/388591/148/8048/8913/4634/3762/3728/3764/7125/776/2626/342667/1824/126306/4151/59272/4607/384/844/6330/27302/6329/6323/5318/6262/3760/55800/6327/4608/3757/23676/1193/2946/477/2697/23704/4842/10008/1134/5294/6781/6336/6547/10021/775/5224/5350/1482
401	group_GSEA_Go_BP.csv	GO:0030500	GO:0030500	regulation of bone mineralization	73	-0.570476	-1.21205	0.046	0.283892	0.249036	3077	tags=52%, list=16%, signal=44%	2824/56172/2185/56975/5552/4208/1594/652/4054/4921/6546/162466/5027/632/91461/2201/6662/84059/144347/9636/7040/654/8074/4958/1311/6779/650/130497/9365/1901/6348/2697/655/4256/26585/4745/338773/5764
402	group_GSEA_Go_BP.csv	GO:0046928	GO:0046928	regulation of neurotransmitter secretion	102	-0.570592	-1.22153	0.024975	0.211068	0.185153	4314	tags=38%, list=23%, signal=30%	5071/4763/6855/8564/7779/6623/5023/321/1143/6853/1141/148/91683/776/1268/8938/9162/1137/27345/3356/339302/9515/5582/5030/815/143425/112755/9627/6857/8973/7476/1813/1812/9699/1129/23025/3351/5579/22999
403	group_GSEA_Go_BP.csv	GO:0070542	GO:0070542	response to fatty acid	83	-0.5707	-1.21409	0.031031	0.236428	0.207399	3296	tags=30%, list=18%, signal=25%	5468/1646/5020/9370/5031/5444/8644/2731/5030/5166/7292/6422/9971/7350/5743/81285/5732/1906/445/2865/7097/4023/4776/948/5737
404	group_GSEA_Go_BP.csv	GO:0061333	GO:0061333	renal tubule morphogenesis	78	-0.570758	-1.21423	0.038	0.259893	0.227983	5809	tags=60%, list=31%, signal=42%	9500/1282/2668/10736/56998/30812/153572/4208/54806/3611/652/6469/2719/65266/26249/51804/7422/55366/7482/7481/186/5727/5076/2247/3911/6662/5087/170690/2625/9788/7484/8549/7040/7475/2138/7490/80000/55083/8642/650/2246/130497/9241/3237/183/3975/7471
405	group_GSEA_Go_BP.csv	GO:0030534	GO:0030534	adult behavior	143	-0.570781	-1.2317	0.004995	0.0837585	0.0734746	4150	tags=37%, list=22%, signal=29%	2043/3766/57578/6623/57731/1600/221935/340990/2257/1143/8997/1141/2693/6900/6506/9379/1621/390084/57626/1949/4988/7111/680/1137/3356/58524/3218/4923/6323/7200/22941/84152/50944/2695/163175/2902/1813/1812/1394/84189/18/2906/80243/4852/7345/477/114798/6387/9378/57502/26047/3170/23544
406	group_GSEA_Go_BP.csv	GO:0035296	GO:0035296	regulation of tube diameter	136	-0.57101	-1.2298	0.00599401	0.0941182	0.0825623	5056	tags=48%, list=27%, signal=35%	116/2296/952/5592/553/5021/9732/6546/2303/551/257313/8862/3383/1907/5997/846/2982/186/552/5023/1401/7349/2266/3672/4846/148/1621/1956/1909/59272/10911/4881/27345/80852/3356/59/1131/3778/1311/153/3274/1816/155/5743/3792/1812/2837/1636/477/185/2697/1906/183/150/7432/10242/1908/40/4842/624/3357/2150/3351/4922/4879
407	group_GSEA_Go_BP.csv	GO:0050880	GO:0050880	regulation of blood vessel size	136	-0.57101	-1.2298	0.00599401	0.0941182	0.0825623	5056	tags=48%, list=27%, signal=35%	116/2296/952/5592/553/5021/9732/6546/2303/551/257313/8862/3383/1907/5997/846/2982/186/552/5023/1401/7349/2266/3672/4846/148/1621/1956/1909/59272/10911/4881/27345/80852/3356/59/1131/3778/1311/153/3274/1816/155/5743/3792/1812/2837/1636/477/185/2697/1906/183/150/7432/10242/1908/40/4842/624/3357/2150/3351/4922/4879
408	group_GSEA_Go_BP.csv	GO:0097746	GO:0097746	regulation of blood vessel diameter	136	-0.57101	-1.2298	0.00599401	0.0941182	0.0825623	5056	tags=48%, list=27%, signal=35%	116/2296/952/5592/553/5021/9732/6546/2303/551/257313/8862/3383/1907/5997/846/2982/186/552/5023/1401/7349/2266/3672/4846/148/1621/1956/1909/59272/10911/4881/27345/80852/3356/59/1131/3778/1311/153/3274/1816/155/5743/3792/1812/2837/1636/477/185/2697/1906/183/150/7432/10242/1908/40/4842/624/3357/2150/3351/4922/4879
409	group_GSEA_Go_BP.csv	GO:0071216	GO:0071216	cellular response to biotic stimulus	229	-0.571015	-1.24069	0.000999001	0.0293189	0.0257191	3678	tags=30%, list=20%, signal=25%	7133/2213/1051/558/27179/3557/353376/27178/834/3055/4846/22914/440068/6374/129607/2693/56300/1234/7124/2672/29126/3576/84639/3606/7040/57379/654/7292/3569/9971/5197/10417/1437/114769/23643/5473/4283/671/6352/10563/1511/5054/730249/4843/54209/6348/3934/64127/7035/445/6373/6850/3627/26191/7097/5196/6347/114548/80380/26525/100528032/23641/79931/948/27177/3553/347252/1440/7494
410	group_GSEA_Go_BP.csv	GO:0015850	GO:0015850	organic hydroxy compound transport	241	-0.571211	-1.24163	0.000999001	0.0293189	0.0257191	3934	tags=39%, list=21%, signal=31%	115584/6623/8435/158219/1133/186/5727/5023/5205/28234/3690/1071/7349/5468/1141/341359/9066/6579/5020/9370/338821/2693/91683/5360/1950/6861/364/5950/390084/23762/5444/1268/255738/26154/6526/84258/9619/1137/1645/3356/3745/5865/4887/654/6696/64805/201780/143425/9971/6857/335/5443/89872/8973/2587/10599/1813/1812/6581/341/1394/6570/18/2207/345274/8714/344/185/3737/183/159963/150/7432/53919/6531/8647/4…
411	group_GSEA_Go_BP.csv	GO:0002237	GO:0002237	response to molecule of bacterial origin	333	-0.572079	-1.25021	0.000999001	0.0293189	0.0257191	3721	tags=32%, list=20%, signal=26%	3587/7133/2213/1051/558/27179/2255/284297/3557/353376/27178/834/3055/4846/22914/440068/6374/129607/2693/56300/1234/496/7124/2672/29126/1268/3576/342979/10225/4988/1991/84639/3606/7040/2706/57379/654/1544/5731/100133941/7292/3569/1634/9971/9536/5197/10417/1437/114769/23643/5743/5473/4283/671/6352/10563/1511/6401/5054/730249/5732/4843/149233/54209/6348/3934/2697/1906/10804/64127/7412/7035/5179/445/…
412	group_GSEA_Go_BP.csv	GO:0003018	GO:0003018	vascular process in circulatory system	165	-0.572183	-1.23776	0.000999001	0.0293189	0.0257191	4386	tags=42%, list=23%, signal=32%	2303/551/388125/7422/257313/8862/3383/1907/5997/846/566/2982/186/552/5023/1401/7349/2266/3672/4846/148/1621/1956/1909/59272/10911/4881/27345/80852/3356/7040/10266/654/59/1131/3778/1311/153/3274/1816/155/145741/5139/5743/9353/3792/1812/2837/1636/477/185/2697/3579/1906/183/150/7010/7432/10242/1908/40/4842/284/624/3357/2150/3351/4922/4879
413	group_GSEA_Go_BP.csv	GO:0031670	GO:0031670	cellular response to nutrient	72	-0.572251	-1.21297	0.045045	0.280659	0.246199	4145	tags=33%, list=22%, signal=26%	5027/652968/846/632/1030/5468/2242/2350/5251/5030/64805/8074/6422/9971/53335/5743/5179/1277/1591/4023/10631/3170/5764/7494
414	group_GSEA_Go_BP.csv	GO:0061045	GO:0061045	negative regulation of wound healing	73	-0.57255	-1.21646	0.041	0.268831	0.235824	3603	tags=33%, list=19%, signal=27%	5340/2247/2266/3848/4846/90102/83481/84830/3273/325/5156/170692/18/5328/5054/2191/2697/1906/5155/7035/710/55966/7056/5055
415	group_GSEA_Go_BP.csv	GO:0055007	GO:0055007	cardiac muscle cell differentiation	114	-0.572593	-1.2307	0.015984	0.169482	0.148673	4285	tags=33%, list=23%, signal=26%	5629/7422/7478/5997/8324/186/859/127294/10529/88/9172/148/8048/2626/50507/4607/93649/7040/28514/5156/27302/9472/7490/650/4892/376132/1906/183/5999/5159/5915/6910/84700/115701/26585/4604/137814/1482
416	group_GSEA_Go_BP.csv	GO:0060411	GO:0060411	cardiac septum morphogenesis	72	-0.572672	-1.21386	0.044044	0.276806	0.24282	4297	tags=33%, list=23%, signal=26%	8701/5629/8829/161882/6586/7481/4846/2626/23462/10512/6899/26508/9353/9241/7042/655/653/2263/5915/6910/4036/1482/57057/6664
417	group_GSEA_Go_BP.csv	GO:0035150	GO:0035150	regulation of tube size	137	-0.572842	-1.2333	0.00599401	0.0941182	0.0825623	5056	tags=48%, list=27%, signal=35%	116/2296/952/5592/553/5021/9732/6546/2303/551/257313/8862/3383/1907/5997/846/2982/186/552/5023/1401/7349/2266/3672/4846/148/1621/1956/1909/59272/10911/4881/27345/7484/80852/3356/59/1131/3778/1311/153/3274/1816/155/5743/3792/1812/2837/1636/477/185/2697/1906/183/150/7432/10242/1908/40/4842/624/3357/2150/3351/4922/4879
418	group_GSEA_Go_BP.csv	GO:0017158	GO:0017158	regulation of calcium ion-dependent exocytosis	110	-0.572968	-1.22991	0.014985	0.165637	0.1453	3548	tags=36%, list=19%, signal=30%	5023/321/6853/1141/341359/9066/148/8913/91683/776/6861/57393/1268/8911/8938/84258/9162/1137/3356/9515/3745/5582/5030/815/143425/112755/6857/8973/7476/1813/1812/9699/1129/150/8912/55503/148281/3351/5579/22999
419	group_GSEA_Go_BP.csv	GO:0090287	GO:0090287	regulation of cellular response to growth factor stimulus	262	-0.573053	-1.24825	0.000999001	0.0293189	0.0257191	3889	tags=34%, list=21%, signal=27%	7041/25960/6424/55612/79812/348093/80139/186/859/81848/7080/64399/2247/1030/3690/2255/6935/4052/10468/2201/114990/6653/2626/9508/9982/2321/79652/9315/23090/2625/1149/7498/93649/63978/7040/8425/3273/28514/9350/203100/6422/1634/390598/7424/91851/9573/402117/860/9353/25928/8646/94031/2246/64388/50515/57608/375567/10563/4916/124857/2200/4015/9241/168667/55816/183/94/375387/5046/64094/90993/2254/8516/…
420	group_GSEA_Go_BP.csv	GO:0050920	GO:0050920	regulation of chemotaxis	208	-0.573194	-1.24347	0.000999001	0.0293189	0.0257191	4455	tags=39%, list=24%, signal=30%	9048/54437/1902/57118/10500/7422/3929/8829/1907/846/566/25960/2841/55079/56920/1235/2247/6346/2255/1880/2152/3071/22914/3673/7857/3576/10512/10371/1233/1991/7040/3273/5156/64805/9750/5458/284340/5880/3569/79148/7424/5919/683/9353/729230/2246/8740/6352/10563/4916/56670/5054/6354/9547/2660/1901/54209/6348/223117/3579/1906/5155/285/1826/1908/64094/3627/5159/6347/7941/2155/91584/2150/26585/6387/2358/…
421	group_GSEA_Go_BP.csv	GO:0098661	GO:0098661	inorganic anion transmembrane transport	109	-0.573257	-1.23	0.012987	0.15157	0.13296	4702	tags=50%, list=25%, signal=38%	2567/9213/1184/1080/56172/1836/1179/6568/25932/2743/1183/26285/6507/2565/2563/846/2556/2568/54831/2559/6505/57468/57348/2561/65012/5349/2570/53405/2555/7809/55107/55879/441509/266675/1188/57030/8542/115111/9022/9635/8001/57101/11095/1187/54102/6557/5172/1193/2569/2557/84561/2554/200959/2564/115019
422	group_GSEA_Go_BP.csv	GO:0043270	GO:0043270	positive regulation of ion transport	267	-0.573623	-1.25073	0.000999001	0.0293189	0.0257191	5627	tags=51%, list=30%, signal=36%	2668/246329/1080/1815/5174/3596/65268/7114/65018/90070/84766/3753/7220/57158/6324/65267/57165/5024/9992/10368/3458/5649/162514/5319/481/1579/30845/287/65266/3759/6769/3784/10142/551/5244/5027/3767/440699/8564/846/288/353514/3747/3746/552/1051/799/51761/5023/88/2257/10345/7349/6331/1141/4638/2273/5020/388591/5031/885/776/8600/27092/342667/6754/59272/2916/5865/844/4887/9001/187/6330/4923/64805/8529…
423	group_GSEA_Go_BP.csv	GO:0031623	GO:0031623	receptor internalization	109	-0.573902	-1.23138	0.012987	0.15157	0.13296	4342	tags=39%, list=23%, signal=30%	50632/26052/9863/7422/8862/6424/859/26045/3690/6900/284654/10267/1950/27092/255738/100506013/3576/6616/54550/10266/43/23237/10203/2890/1759/1813/27091/6401/2207/59284/3579/10369/6850/57007/284/146395/59283/3357/3351/26585/10268/948
424	group_GSEA_Go_BP.csv	GO:1903169	GO:1903169	regulation of calcium ion transmembrane transport	144	-0.574039	-1.23887	0.003996	0.0732048	0.0642167	2741	tags=26%, list=15%, signal=22%	342667/126306/57338/785/7040/844/9001/187/4923/57214/117531/9472/6262/4283/1813/1812/1394/1193/196541/2946/477/6236/150/9002/6373/4842/84502/10008/3627/5294/10268/775/7070/5350/6588/623/28954
425	group_GSEA_Go_BP.csv	GO:0035270	GO:0035270	endocrine system development	127	-0.574961	-1.23683	0.00999001	0.132244	0.116007	4148	tags=39%, list=22%, signal=31%	4763/2696/5991/429/7481/7038/219409/5080/7080/2255/4760/222546/6662/5078/5087/2736/2625/6899/6496/6658/7068/28514/654/5156/9247/3172/2691/3642/3569/3200/335/7490/2695/650/1813/5075/190/1394/4821/5307/9241/6531/653/5626/1392/999/64220/27122/3170/1482
426	group_GSEA_Go_BP.csv	GO:0045766	GO:0045766	positive regulation of angiogenesis	161	-0.575258	-1.2433	0.001998	0.0457645	0.0401455	3269	tags=30%, list=17%, signal=25%	51378/2152/4846/27286/2693/3728/1116/8091/2626/3082/9982/2321/100506013/958/3576/126259/10266/28514/146850/187/1215/7424/6369/5743/2246/57608/5054/7075/6356/5740/168667/185/3579/94/285/7010/64094/79924/1232/306/358/7101/718/5579/3552/6423/3553/6019/7494
427	group_GSEA_Go_BP.csv	GO:0050890	GO:0050890	cognition	293	-0.575381	-1.25449	0.000999001	0.0293189	0.0257191	3437	tags=30%, list=18%, signal=25%	266743/57468/7349/8997/590/1141/93986/5020/84630/2693/6900/885/7124/9379/1621/1956/1268/627/57338/4803/9162/6326/1137/151556/6616/54207/3356/4761/266977/5582/4923/57030/164312/3274/23237/431707/25769/8484/2890/2048/1816/22941/84152/50944/2695/5743/2902/1813/1812/11036/1394/5803/53358/54112/11202/6356/477/183/4593/3973/7432/6529/7143/84502/353134/1392/7097/4248/8516/5153/139411/1620/56924/114/4776…
428	group_GSEA_Go_BP.csv	GO:0034766	GO:0034766	negative regulation of ion transmembrane transport	92	-0.575396	-1.22811	0.021	0.190965	0.167518	4207	tags=34%, list=22%, signal=26%	100507027/5997/7779/285966/288/859/88/2257/10345/57520/255738/7040/4923/2048/1813/3792/1394/130497/3757/1193/2946/4318/477/6236/150/5999/23704/10008/5350/6588/28954
429	group_GSEA_Go_BP.csv	GO:0048514	GO:0048514	blood vessel morphogenesis	563	-0.575723	-1.26086	0.000999001	0.0293189	0.0257191	3316	tags=30%, list=18%, signal=25%	80781/5468/3911/1942/3848/79400/51378/2152/57125/4638/4846/27286/575/161198/2693/5787/2049/3728/10267/1950/1116/8091/2626/10481/3082/3135/23462/1909/7857/54567/8456/9982/2321/100506013/958/3576/2822/2833/84830/4881/6899/7498/93649/3606/126259/7040/10266/3273/28514/146850/2251/5156/187/54345/1215/1285/1296/2028/1311/1464/221981/284340/3569/6422/2138/1634/9047/255324/7424/6369/5617/3200/7490/64321/…
430	group_GSEA_Go_BP.csv	GO:0001659	GO:0001659	temperature homeostasis	171	-0.576043	-1.24567	0.000999001	0.0293189	0.0257191	4386	tags=36%, list=23%, signal=28%	2303/8473/7422/55366/8862/3717/2104/1907/56034/283455/6319/79054/3953/1051/3910/5020/9370/7351/8600/7124/8809/1621/1268/10874/23090/5334/1149/3606/3356/4923/5618/43/153/7350/216/33/51316/155/51087/5743/729230/1813/1812/18/1734/4858/26291/5733/338557/3934/2697/6850/64641/11096/50508/50486/3552/948/3553/1240/6588
431	group_GSEA_Go_BP.csv	GO:1903035	GO:1903035	negative regulation of response to wounding	87	-0.576086	-1.22842	0.022	0.196222	0.17213	3603	tags=32%, list=19%, signal=26%	5340/2247/2266/3848/4846/90102/83481/84830/3273/325/5156/6696/170692/18/5328/5054/11202/2191/2697/1906/5155/7035/7143/710/55966/7056/5055/146760
432	group_GSEA_Go_BP.csv	GO:0061448	GO:0061448	connective tissue development	263	-0.576302	-1.2556	0.000999001	0.0293189	0.0257191	3729	tags=33%, list=20%, signal=27%	7481/2261/55790/340260/1294/151449/2247/4322/7483/6935/340419/54360/6662/642658/1116/8091/6653/144347/1291/2736/651/2822/5745/6097/7040/1302/85477/2251/654/9350/59/2202/27302/5458/1311/81029/7704/9971/3200/7490/1513/2828/1301/860/5081/7476/650/2487/8710/50515/1289/130497/7477/5307/4015/9241/1906/5155/5396/94/81578/655/653/1690/4920/2254/51435/7373/64641/5159/4256/5915/1292/1277/55959/26585/81792/…
433	group_GSEA_Go_BP.csv	GO:0098869	GO:0098869	cellular oxidant detoxification	93	-0.576465	-1.23053	0.025	0.211068	0.185153	3145	tags=28%, list=17%, signal=23%	4846/3045/6280/7124/137902/257202/3046/6649/26034/3050/2880/2878/5743/1193/2946/2882/7173/655/337/3240/84203/5742/4504/125336/948/7837
434	group_GSEA_Go_BP.csv	GO:0001525	GO:0001525	angiogenesis	474	-0.576502	-1.26144	0.000999001	0.0293189	0.0257191	3316	tags=31%, list=18%, signal=26%	80781/5468/3911/1942/3848/79400/51378/2152/57125/4846/27286/575/161198/2693/5787/2049/3728/10267/1950/1116/8091/2626/10481/3082/3135/23462/1909/7857/54567/9982/2321/100506013/958/3576/2822/2833/84830/4881/6899/3606/126259/10266/3273/28514/146850/2251/5156/187/54345/1215/1285/1296/2028/1464/221981/284340/3569/6422/1634/9047/255324/7424/6369/5617/3200/64321/10203/2828/5175/4327/2048/11005/441478/74…
435	group_GSEA_Go_BP.csv	GO:0034763	GO:0034763	negative regulation of transmembrane transport	112	-0.576599	-1.23882	0.012987	0.15157	0.13296	4054	tags=31%, list=22%, signal=25%	100507027/5997/7779/285966/288/859/88/2257/10345/7124/57520/255738/7040/4923/2048/1813/3792/1394/130497/3757/1193/2946/4318/477/6236/150/5999/23704/10008/5579/5350/3553/344901/6588/28954
436	group_GSEA_Go_BP.csv	GO:0006959	GO:0006959	humoral immune response	241	-0.576696	-1.25356	0.000999001	0.0293189	0.0257191	3645	tags=40%, list=19%, signal=33%	602/725/2213/51279/3449/1235/1380/1401/1880/3447/85569/3848/720/5657/6407/78989/6357/55061/6374/6280/130120/731/7124/56832/730/717/4068/5068/5648/5650/80341/3576/326/10578/25818/732/92747/1991/2625/6039/338376/3273/1755/325/57829/1675/3078/117159/3569/5266/3456/5197/5919/683/5225/3075/10417/5133/11005/5646/3439/5320/729230/5473/4283/671/1370/10563/1511/55600/716/730249/922/5452/3346/2219/54209/39…
437	group_GSEA_Go_BP.csv	GO:0006836	GO:0006836	neurotransmitter transport	266	-0.576887	-1.25755	0.000999001	0.0293189	0.0257191	4336	tags=41%, list=23%, signal=32%	57153/5071/440279/8862/4763/5027/6854/3766/60482/6855/5997/8564/7779/6623/3177/348932/27445/9143/774/6582/5023/9899/6538/6505/22987/321/1143/3690/6853/6540/1141/54716/9066/148/91683/6506/776/8600/6861/388662/9379/112476/140679/2571/26059/1268/8938/9162/2555/1137/6616/27345/3356/339302/9515/2572/8618/5865/55879/5582/5030/4923/815/57030/143425/112755/9627/246213/6539/6857/8973/7223/9256/1437/7200/7…
438	group_GSEA_Go_BP.csv	GO:1902803	GO:1902803	regulation of synaptic vesicle transport	82	-0.576896	-1.2276	0.026026	0.216015	0.189492	3548	tags=33%, list=19%, signal=27%	5023/321/6853/1141/148/776/1268/4133/9162/1137/3356/9515/5582/5030/815/143425/112755/6857/8973/7476/1813/1812/9699/1129/3351/5579/22999
439	group_GSEA_Go_BP.csv	GO:0021761	GO:0021761	limbic system development	108	-0.577012	-1.23774	0.00899101	0.12375	0.108556	4285	tags=34%, list=23%, signal=27%	5629/8829/4763/8941/63827/7832/1600/64211/55079/219409/7080/4760/140679/10371/6658/9001/4142/9638/3736/3283/4747/1813/1812/190/30062/1394/2018/3361/5626/2263/3284/1392/306/7101/137814/27023/26047
440	group_GSEA_Go_BP.csv	GO:0060359	GO:0060359	response to ammonium ion	131	-0.577022	-1.24098	0.00599401	0.0941182	0.0825623	3794	tags=31%, list=20%, signal=25%	1133/221935/3747/84557/2769/2561/1141/58530/5020/27092/23284/390084/1268/4988/1137/2731/3356/5582/1131/3359/85397/1816/84152/2902/1813/1812/1394/6870/18/1129/6529/6531/5179/445/5999/2554/1392/3351/114/6863
441	group_GSEA_Go_BP.csv	GO:0001523	GO:0001523	retinoid metabolic process	104	-0.577099	-1.2357	0.013986	0.15837	0.138926	2719	tags=30%, list=15%, signal=26%	5950/6010/10170/8644/1645/158835/5947/10082/195814/1544/6383/50700/335/5919/29785/216/54577/339761/1208/24/1382/344/6121/54576/1558/337/4023/4036/5406/64220/1381
442	group_GSEA_Go_BP.csv	GO:0010717	GO:0010717	regulation of epithelial to mesenchymal transition	83	-0.577103	-1.22772	0.026026	0.216015	0.189492	3889	tags=29%, list=21%, signal=23%	7041/80139/7080/1942/90102/114990/3249/7040/3569/6422/6317/650/10630/152007/9241/7042/655/653/6910/1277/26585/6423/3553/3170
443	group_GSEA_Go_BP.csv	GO:0051963	GO:0051963	regulation of synapse assembly	104	-0.577178	-1.23587	0.013986	0.15837	0.138926	4829	tags=46%, list=26%, signal=34%	5021/57408/23768/22859/6585/145581/347731/51804/23769/576/2895/26045/94030/11141/1946/1141/5020/27286/575/2693/2049/158038/23284/627/8292/387804/147381/9746/54674/2045/2048/2596/7476/2902/84189/4916/64084/4593/40/7097/114798/22865/26280/4914/441381/9378/79953/57633
444	group_GSEA_Go_BP.csv	GO:0120162	GO:0120162	positive regulation of cold-induced thermogenesis	96	-0.5775	-1.23415	0.018	0.175973	0.154367	4309	tags=36%, list=23%, signal=28%	8473/7422/3717/2104/56034/283455/6319/79054/3953/1051/5020/9370/7351/1621/3606/5618/43/153/7350/33/51316/155/51087/729230/1734/26291/338557/3934/2697/6850/64641/50486/948/1240/6588
445	group_GSEA_Go_BP.csv	GO:0032413	GO:0032413	negative regulation of ion transmembrane transporter activity	68	-0.577521	-1.22032	0.049	0.29568	0.259377	3877	tags=34%, list=21%, signal=27%	285966/288/859/88/2257/10345/57520/255738/2048/1813/1394/130497/1193/2946/4318/477/6236/150/23704/10008/5350/6588/28954
446	group_GSEA_Go_BP.csv	GO:1903510	GO:1903510	mucopolysaccharide metabolic process	112	-0.577635	-1.24105	0.00999001	0.132244	0.116007	4717	tags=36%, list=25%, signal=27%	9435/56548/3038/5549/92126/166012/80760/1463/63827/3425/11081/55790/2247/1950/50859/3082/29940/64579/7040/57214/4958/1464/1634/10331/83539/50515/64131/5155/133584/10894/3036/284/23553/633/51363/1462/347365/3553/176/2331
447	group_GSEA_Go_BP.csv	GO:1904018	GO:1904018	positive regulation of vasculature development	179	-0.578204	-1.24999	0.000999001	0.0293189	0.0257191	3269	tags=30%, list=17%, signal=25%	51378/2152/4846/27286/2693/3728/1116/8091/2626/3082/9982/2321/100506013/958/3576/93649/126259/10266/28514/146850/187/1215/7424/6369/5743/8710/2246/57608/5054/7075/6356/5740/168667/185/3579/5155/94/285/7010/51666/64094/79924/1232/306/358/7101/718/5579/55273/3552/6423/3553/6019/7494
448	group_GSEA_Go_BP.csv	GO:0002700	GO:0002700	regulation of production of molecular mediator of immune response	135	-0.578704	-1.24637	0.003996	0.0732048	0.0642167	3168	tags=33%, list=17%, signal=28%	3558/3718/23586/7133/2213/9865/959/1178/7124/8809/3135/5950/30009/5650/958/10225/25818/684/2625/3606/7040/7292/3569/3554/3456/335/90865/5225/10417/11005/729230/7293/91543/2207/64127/7042/115352/2865/11213/284/114548/2150/948/3553/7494
449	group_GSEA_Go_BP.csv	GO:0051208	GO:0051208	sequestering of calcium ion	125	-0.578705	-1.24425	0.00699301	0.103924	0.0911642	3027	tags=28%, list=16%, signal=24%	6261/1234/5031/126306/57338/3356/7040/844/9001/187/4923/57214/5330/9472/8989/6262/4283/1813/1812/1193/196541/2946/477/6348/9002/6373/4842/84502/3627/3357/775/7070/5350/623/3358
450	group_GSEA_Go_BP.csv	GO:0070167	GO:0070167	regulation of biomineral tissue development	91	-0.57889	-1.23481	0.02	0.184642	0.161972	4888	tags=45%, list=26%, signal=33%	1594/652/4054/4921/6546/162466/265/5027/54829/152816/632/91461/1051/4846/2201/6662/84059/144347/9636/23462/7040/654/7475/8074/4958/1311/6779/650/130497/9365/1901/6348/2697/655/10117/4256/26585/4745/338773/5764/9313
451	group_GSEA_Go_BP.csv	GO:0006865	GO:0006865	amino acid transport	142	-0.578919	-1.24846	0.001998	0.0457645	0.0401455	4148	tags=38%, list=22%, signal=30%	4763/5027/3766/5997/8564/6519/348932/552/6538/6505/6540/83884/54716/6506/885/388662/140679/59272/157724/23428/6616/56301/146167/4923/84889/80131/57030/246213/387700/6539/6857/4889/7223/9256/7200/10630/130497/18/10991/2917/6534/6536/477/183/6529/5999/340024/6511/55089/6512/151258/57084/9900/22999
452	group_GSEA_Go_BP.csv	GO:0060420	GO:0060420	regulation of heart growth	64	-0.579281	-1.22032	0.049	0.29568	0.259377	4453	tags=34%, list=24%, signal=26%	5600/5629/26281/5997/859/2066/2247/5950/10409/7161/27302/9472/7490/9241/2697/1906/5999/2263/2254/6910/1482/57057
453	group_GSEA_Go_BP.csv	GO:0032355	GO:0032355	response to estradiol	130	-0.579689	-1.247	0.004995	0.0837585	0.0734746	3703	tags=32%, list=20%, signal=26%	8835/80139/5727/2255/7349/4324/6752/5020/4656/2693/2688/3673/374/1956/7040/2706/10266/1544/5458/1446/6422/7476/5743/6870/117/2697/183/7035/6529/3361/5179/655/445/920/5159/2155/1277/10268/10631/6751/5737/5764
454	group_GSEA_Go_BP.csv	GO:0032496	GO:0032496	response to lipopolysaccharide	320	-0.579801	-1.26636	0.000999001	0.0293189	0.0257191	3217	tags=30%, list=17%, signal=25%	353376/27178/834/3055/4846/22914/440068/6374/129607/2693/56300/1234/496/7124/2672/29126/1268/3576/342979/10225/4988/1991/84639/3606/7040/2706/57379/654/1544/5731/7292/3569/1634/9971/9536/5197/10417/1437/114769/23643/5743/5473/4283/671/6352/10563/1511/6401/5054/730249/5732/4843/149233/54209/6348/3934/2697/1906/10804/64127/7412/7035/5179/445/6373/2263/4842/3627/26191/4016/11213/7097/5196/5739/6347/…
455	group_GSEA_Go_BP.csv	GO:0043266	GO:0043266	regulation of potassium ion transport	94	-0.579908	-1.23857	0.018	0.175973	0.154367	4561	tags=43%, list=24%, signal=32%	287/65266/3759/3784/10142/440699/288/3747/859/3746/2645/88/2273/4846/388591/776/3787/3356/30820/3736/9472/1813/3792/1812/3757/54209/389816/150/7432/5999/1908/23704/4842/57628/10008/482/51083/126755/81832/1804
456	group_GSEA_Go_BP.csv	GO:0042446	GO:0042446	hormone biosynthetic process	85	-0.580173	-1.23489	0.022	0.196222	0.17213	3472	tags=32%, list=19%, signal=26%	441282/1583/55809/1735/7124/2672/3294/8644/1586/654/50700/9256/3283/650/1103/83539/3293/1734/7173/8912/653/2865/3284/1392/3290/27122/3553
457	group_GSEA_Go_BP.csv	GO:0034219	GO:0034219	carbohydrate transmembrane transport	110	-0.580174	-1.24538	0.00799201	0.114228	0.100203	4791	tags=35%, list=26%, signal=27%	2719/5319/55022/6517/23433/57761/115584/200010/6515/25999/83667/9370/6506/2688/6518/7124/1909/6526/6524/5458/286753/155184/2695/5473/81031/1812/50651/55600/26291/338557/1906/154091/144195/6514/718/5579/6523/3553/344901
458	group_GSEA_Go_BP.csv	GO:0071222	GO:0071222	cellular response to lipopolysaccharide	198	-0.580203	-1.25768	0.000999001	0.0293189	0.0257191	3678	tags=33%, list=20%, signal=27%	7133/1051/558/27179/3557/353376/27178/834/3055/4846/22914/440068/6374/129607/2693/56300/1234/7124/2672/29126/3576/84639/3606/7040/57379/654/7292/3569/9971/5197/10417/1437/114769/23643/5473/4283/671/6352/10563/1511/5054/730249/4843/6348/3934/64127/7035/445/6373/3627/26191/7097/5196/6347/114548/80380/26525/100528032/23641/79931/948/27177/3553/1440/7494
459	group_GSEA_Go_BP.csv	GO:0090092	GO:0090092	regulation of transmembrane receptor protein serine/threonine kinase signaling pathway	226	-0.580306	-1.26049	0.000999001	0.0293189	0.0257191	3889	tags=34%, list=21%, signal=27%	54829/112744/7041/6424/55612/348093/80139/859/151449/7080/83729/1030/8483/2255/10220/6935/4052/10468/2201/114990/6653/2626/651/9315/23090/1149/93649/7040/8425/654/9350/27302/203100/3624/6422/2662/390598/91851/9573/402117/650/25928/8646/94031/64388/50515/375567/2660/124857/2200/4015/9241/3625/168667/94/375387/7042/3547/655/653/5046/2254/8516/26585/652991/4036/50964/6423/7021/27122/392255/23213/168…
460	group_GSEA_Go_BP.csv	GO:0046849	GO:0046849	bone remodeling	90	-0.58071	-1.23847	0.018	0.175973	0.154367	5471	tags=50%, list=29%, signal=36%	9607/2185/171392/54/1969/115908/952/8200/7128/6694/4054/3375/51208/55366/10609/4763/5027/632/3953/3690/9066/8600/1956/50507/5745/53832/7040/6696/3635/5166/5880/3569/6422/1513/4982/1901/2697/6850/3351/1943/26585/4160/338773/5764/81501
461	group_GSEA_Go_BP.csv	GO:0046503	GO:0046503	glycerolipid catabolic process	64	-0.580917	-1.22377	0.048	0.292355	0.25646	3991	tags=36%, list=21%, signal=28%	747/646480/440503/2166/283748/646486/6653/2172/150379/2822/2173/13/335/133121/341/255189/26291/344/285848/337/5294/4023/3990
462	group_GSEA_Go_BP.csv	GO:1990748	GO:1990748	cellular detoxification	103	-0.580939	-1.24399	0.011988	0.146842	0.128813	3145	tags=28%, list=17%, signal=24%	4846/3045/6280/9429/7124/137902/257202/3046/6649/26034/3050/2880/2878/5743/2947/2944/1193/2946/2882/7173/655/337/3240/84203/5742/4504/125336/948/7837
463	group_GSEA_Go_BP.csv	GO:2001023	GO:2001023	regulation of response to drug	92	-0.58104	-1.24015	0.017	0.175146	0.153641	3370	tags=37%, list=18%, signal=30%	7349/1141/341359/9066/91683/8091/6861/3082/390084/1268/84258/1137/3356/5865/4887/10974/143425/6857/8973/2587/1813/1812/130497/18/477/3737/2557/183/5999/1392/51083/148281/3351/6387
464	group_GSEA_Go_BP.csv	GO:1901655	GO:1901655	cellular response to ketone	93	-0.581082	-1.24039	0.017	0.175146	0.153641	3785	tags=31%, list=20%, signal=25%	687/186/266743/1946/5468/1646/111/5031/1956/8644/367/7040/2706/5030/6696/7292/6422/167127/2660/730249/5732/196541/445/1392/358/114/5105/5737/6663
465	group_GSEA_Go_BP.csv	GO:0072376	GO:0072376	protein activation cascade	93	-0.58124	-1.24073	0.017	0.175146	0.153641	4200	tags=41%, list=22%, signal=32%	1191/2157/2192/100423062/725/51279/1380/1401/2266/3848/720/2152/78989/55061/731/730/717/5648/732/325/1675/3078/3075/1370/716/922/2219/2162/7035/51435/710/3426/2/2155/718/10877/3553/10584
466	group_GSEA_Go_BP.csv	GO:0032755	GO:0032755	positive regulation of interleukin-6 production	91	-0.581552	-1.24048	0.016	0.169482	0.148673	4630	tags=43%, list=25%, signal=32%	9181/64581/64135/55765/3929/5027/112744/353514/23586/27179/5603/3557/7349/27178/56300/7124/338322/51311/84639/53342/7292/51284/3569/90865/10417/2207/284194/64127/114900/6850/7097/2069/2150/4023/26525/948/27177/3553/7494
467	group_GSEA_Go_BP.csv	GO:0051282	GO:0051282	regulation of sequestering of calcium ion	122	-0.581662	-1.25062	0.00699301	0.103924	0.0911642	3027	tags=29%, list=16%, signal=24%	6261/1234/5031/126306/57338/3356/7040/844/9001/187/4923/57214/5330/9472/8989/6262/4283/1813/1812/1193/196541/2946/477/6348/9002/6373/4842/84502/3627/3357/775/7070/5350/623/3358
468	group_GSEA_Go_BP.csv	GO:0045598	GO:0045598	regulation of fat cell differentiation	120	-0.581693	-1.25047	0.00699301	0.103924	0.0911642	4056	tags=32%, list=22%, signal=26%	252995/57761/161882/7041/688/149685/11197/1051/5468/55885/9370/6783/7124/2625/6097/3356/7040/1050/10974/4320/81029/7704/3569/6422/5919/9573/201501/5743/650/2487/85329/4023/374462/6423/84935/1240/7471/3358/7494
469	group_GSEA_Go_BP.csv	GO:0060401	GO:0060401	cytosolic calcium ion transport	165	-0.581716	-1.25839	0.000999001	0.0293189	0.0257191	3127	tags=28%, list=17%, signal=24%	148/6261/1234/5031/126306/57338/728215/3356/7040/844/9001/187/4923/57214/5330/9472/8989/56302/6262/4283/2902/1813/1812/5026/2906/117/1193/196541/2946/477/6348/9002/920/6373/4842/84502/3627/55503/3357/6547/10268/2904/775/7070/5350/623/3358
470	group_GSEA_Go_BP.csv	GO:0071219	GO:0071219	cellular response to molecule of bacterial origin	205	-0.58177	-1.26225	0.000999001	0.0293189	0.0257191	3678	tags=33%, list=20%, signal=27%	7133/2213/1051/558/27179/3557/353376/27178/834/3055/4846/22914/440068/6374/129607/2693/56300/1234/7124/2672/29126/3576/84639/3606/7040/57379/654/7292/3569/9971/5197/10417/1437/114769/23643/5473/4283/671/6352/10563/1511/5054/730249/4843/54209/6348/3934/64127/7035/445/6373/3627/26191/7097/5196/6347/114548/80380/26525/100528032/23641/79931/948/27177/3553/1440/7494
471	group_GSEA_Go_BP.csv	GO:0021510	GO:0021510	spinal cord development	106	-0.582538	-1.24865	0.00899101	0.12375	0.108556	3827	tags=36%, list=20%, signal=29%	429/84695/1600/64211/340260/5727/151449/219409/5080/10220/57125/26227/170825/2736/54567/55906/387804/1630/167826/58524/6656/3218/28514/374946/644168/5081/4747/8646/4821/9241/3975/27023/5212/10660/57057/7471/5764/6664
472	group_GSEA_Go_BP.csv	GO:0022617	GO:0022617	extracellular matrix disassembly	79	-0.582628	-1.24014	0.02	0.184642	0.161972	4015	tags=43%, list=21%, signal=34%	6624/1803/4325/5340/4322/4324/3936/3817/5650/25818/1991/7040/1215/4320/3569/1513/4319/9622/4327/222663/10630/1511/9507/4314/4318/2191/1520/2/11096/7092/124056/4312/4321/9313
473	group_GSEA_Go_BP.csv	GO:0015909	GO:0015909	long-chain fatty acid transport	68	-0.582761	-1.23139	0.04	0.26573	0.233104	2202	tags=28%, list=12%, signal=25%	6754/84647/28965/4923/3933/11001/80763/5320/1813/255189/5322/1636/26279/391013/56923/50487/6850/624/948
474	group_GSEA_Go_BP.csv	GO:0051283	GO:0051283	negative regulation of sequestering of calcium ion	121	-0.582848	-1.25301	0.00799201	0.114228	0.100203	3027	tags=29%, list=16%, signal=24%	6261/1234/5031/126306/57338/3356/7040/844/9001/187/4923/57214/5330/9472/8989/6262/4283/1813/1812/1193/196541/2946/477/6348/9002/6373/4842/84502/3627/3357/775/7070/5350/623/3358
475	group_GSEA_Go_BP.csv	GO:0008344	GO:0008344	adult locomotory behavior	77	-0.583142	-1.24145	0.026	0.216015	0.189492	4314	tags=40%, list=23%, signal=31%	5071/2043/3766/6623/57731/1600/340990/2257/8997/6900/57626/1949/7111/58524/3218/4923/6323/7200/2695/163175/2902/1813/1812/84189/2906/80243/7345/477/6387/3170/23544
476	group_GSEA_Go_BP.csv	GO:0003151	GO:0003151	outflow tract morphogenesis	76	-0.583588	-1.24163	0.026	0.216015	0.189492	2563	tags=25%, list=14%, signal=22%	10512/6899/4887/54345/2138/4889/64321/26508/9241/7042/655/2263/5915/4036/6423/1482/57057/6664/2006
477	group_GSEA_Go_BP.csv	GO:0030282	GO:0030282	bone mineralization	111	-0.583754	-1.25353	0.00599401	0.0941182	0.0825623	4888	tags=46%, list=26%, signal=34%	1594/652/2719/4054/2268/4921/6546/162466/55366/246/5027/54829/632/91461/7481/2261/4322/340419/2201/6662/84059/144347/9636/5251/5745/7040/654/9350/8074/4958/1311/6779/7123/5743/650/130497/9365/1901/4015/6348/2697/655/2263/4920/4256/26585/4745/338773/3381/1278/5764
478	group_GSEA_Go_BP.csv	GO:0019932	GO:0019932	second-messenger-mediated signaling	433	-0.583899	-1.27787	0.000999001	0.0293189	0.0257191	4604	tags=42%, list=25%, signal=33%	112609/22859/120796/287/5788/122042/51554/6546/5140/1902/4773/5734/6014/7422/55366/10846/2492/1827/196/5027/2696/30817/1907/1524/5997/5141/576/566/27445/51778/283455/1672/10231/2982/3747/186/23266/552/799/10345/1235/7349/10316/4760/222487/4846/148/2494/575/139378/6662/1234/10267/111/5031/8600/7124/10900/6364/2039/23284/1956/126306/390084/2774/6754/57338/3576/2833/5745/4988/1233/389692/4881/2829/1…
479	group_GSEA_Go_BP.csv	GO:0072507	GO:0072507	divalent inorganic cation homeostasis	499	-0.583947	-1.27903	0.000999001	0.0293189	0.0257191	3686	tags=34%, list=20%, signal=28%	79054/859/6543/552/55630/799/6359/5023/10345/1235/10161/2247/2769/6346/54757/9170/79608/887/5020/6357/148/8048/6280/2898/6261/1234/111/5031/776/8600/7052/1956/126306/1909/1268/958/57338/728215/10874/2833/5745/1233/1991/2829/3356/643/7040/844/4887/89885/5030/9001/5156/187/4923/5731/7224/100133941/1903/6288/7781/57214/5330/9247/6355/2780/3777/3736/4499/9472/25769/8989/2828/7223/2587/2890/9256/1816/…
480	group_GSEA_Go_BP.csv	GO:0055013	GO:0055013	cardiac muscle cell development	78	-0.58412	-1.24266	0.024	0.207247	0.181801	4477	tags=36%, list=24%, signal=27%	6546/5629/7422/5997/186/859/127294/10529/88/9172/148/8048/2626/4607/5156/27302/9472/4892/376132/1906/183/5999/5159/84700/115701/4604/137814/1482
481	group_GSEA_Go_BP.csv	GO:0051591	GO:0051591	response to cAMP	95	-0.584533	-1.24885	0.011	0.140748	0.123467	3151	tags=29%, list=17%, signal=25%	5020/9370/374/2039/50507/348980/1261/5798/9472/7490/4327/3488/5322/5313/7010/6531/5179/445/358/1277/7056/7425/5294/6781/6547/10021/5105/5972
482	group_GSEA_Go_BP.csv	GO:0043271	GO:0043271	negative regulation of ion transport	143	-0.584947	-1.26227	0.000999001	0.0293189	0.0257191	4207	tags=36%, list=22%, signal=28%	100507027/3383/5270/5997/6406/7779/285966/288/6424/945/186/859/88/2257/10345/4846/57520/1268/255738/3356/7040/4923/8529/4889/2048/7200/5743/1813/3792/1394/130497/18/3757/2917/1193/2946/4318/477/6236/150/7432/5999/23704/4842/10008/57119/3351/2564/6781/5350/6588/28954
483	group_GSEA_Go_BP.csv	GO:0016101	GO:0016101	diterpenoid metabolic process	110	-0.585059	-1.25587	0.004995	0.0837585	0.0734746	2759	tags=30%, list=15%, signal=26%	1956/5950/6010/10170/8644/1645/158835/5947/10082/195814/1544/6383/50700/335/5919/29785/216/54577/339761/1208/24/1382/344/6121/54576/1392/1558/337/4023/4036/5406/64220/1381
484	group_GSEA_Go_BP.csv	GO:0031214	GO:0031214	biomineral tissue development	159	-0.585264	-1.26477	0.000999001	0.0293189	0.0257191	4888	tags=45%, list=26%, signal=33%	1594/133060/652/2719/4054/2268/4921/6546/162466/265/55366/246/5027/54829/152816/632/91461/7481/2261/1051/4322/54757/340419/4846/2201/6662/84059/144347/9636/23462/5251/5745/6899/7040/654/9350/6696/7475/8074/4958/1311/6779/1834/7123/9622/5743/650/258/130497/131149/3346/9365/1901/4015/6348/2697/655/2263/4920/10117/4256/1277/26585/4745/752014/3347/338773/3381/1278/5764/9313
485	group_GSEA_Go_BP.csv	GO:0072006	GO:0072006	nephron development	141	-0.585279	-1.26144	0.000999001	0.0293189	0.0257191	4386	tags=45%, list=23%, signal=35%	65266/2303/26249/9863/51804/7422/55366/793/7482/7481/5979/186/1286/5727/5076/4811/2247/3911/9370/6662/4868/5087/170690/10409/2625/9788/7484/7040/28514/5156/59/7475/1285/100133941/2028/2138/7490/2828/5175/80000/55083/26508/8642/650/8710/2246/130497/7477/9241/5420/3237/5155/183/285/7010/655/4854/5159/284/3975/55959/7021/23213/7471
486	group_GSEA_Go_BP.csv	GO:0071804	GO:0071804	cellular potassium ion transport	206	-0.585837	-1.27106	0.000999001	0.0293189	0.0257191	4572	tags=46%, list=24%, signal=35%	157855/287/6507/65266/3748/3759/3750/3784/10142/3769/3766/3767/440699/27094/84679/610/285335/288/3747/859/3746/3744/9424/9132/88/57468/3786/60598/2273/388591/3762/3754/3764/496/776/348980/3775/27133/3249/3738/6616/3787/54207/27345/3745/64805/3778/6550/30820/3763/3785/93107/3777/3736/9472/480/25769/3768/3772/150160/284525/6833/8645/100134444/486/3760/3758/3792/6557/3757/477/54209/389816/3737/84561…
487	group_GSEA_Go_BP.csv	GO:0071805	GO:0071805	potassium ion transmembrane transport	206	-0.585837	-1.27106	0.000999001	0.0293189	0.0257191	4572	tags=46%, list=24%, signal=35%	157855/287/6507/65266/3748/3759/3750/3784/10142/3769/3766/3767/440699/27094/84679/610/285335/288/3747/859/3746/3744/9424/9132/88/57468/3786/60598/2273/388591/3762/3754/3764/496/776/348980/3775/27133/3249/3738/6616/3787/54207/27345/3745/64805/3778/6550/30820/3763/3785/93107/3777/3736/9472/480/25769/3768/3772/150160/284525/6833/8645/100134444/486/3760/3758/3792/6557/3757/477/54209/389816/3737/84561…
488	group_GSEA_Go_BP.csv	GO:0032103	GO:0032103	positive regulation of response to external stimulus	300	-0.586034	-1.27757	0.000999001	0.0293189	0.0257191	4455	tags=40%, list=24%, signal=31%	9048/1902/5734/57118/3572/388125/7422/3929/3717/8829/1907/3558/9180/81793/846/112744/566/353514/5340/1051/84699/5603/1235/115362/2247/6346/2255/2152/3071/6280/84630/55601/2693/3673/8600/7124/7052/1956/7857/5650/1268/338322/3576/4988/25818/1233/3606/7040/1050/3273/654/26471/64805/9750/53342/5008/7292/51284/284340/5880/3569/7424/6369/90865/5919/4889/5225/23643/145741/5743/5320/9353/729230/8740/6352…
489	group_GSEA_Go_BP.csv	GO:0061178	GO:0061178	regulation of insulin secretion involved in cellular response to glucose stimulus	57	-0.586066	-1.22749	0.0471414	0.289564	0.254011	3324	tags=26%, list=18%, signal=22%	1946/222546/111/57393/2822/8938/55107/9971/2850/7447/150/2641/1392/114/3170
490	group_GSEA_Go_BP.csv	GO:0071300	GO:0071300	cellular response to retinoic acid	69	-0.586153	-1.23859	0.034	0.248735	0.218195	4059	tags=42%, list=22%, signal=33%	472/8324/7481/5979/5076/57795/5468/7483/4656/6662/6096/6899/7484/7475/3199/81029/2707/11211/130497/4916/7477/4058/2263/5915/358/1277/339479/1620/5105
491	group_GSEA_Go_BP.csv	GO:0048844	GO:0048844	artery morphogenesis	64	-0.586285	-1.23507	0.04	0.26573	0.233104	4853	tags=45%, list=26%, signal=34%	652/9464/3198/3248/2303/5629/7422/8829/4763/2294/7481/4638/23462/54567/6899/93649/1311/2138/9241/5396/94/7042/639/4854/5159/4036/64220/7021/1281
492	group_GSEA_Go_BP.csv	GO:0015749	GO:0015749	monosaccharide transmembrane transport	108	-0.586326	-1.25772	0.004995	0.0837585	0.0734746	4791	tags=36%, list=26%, signal=27%	2719/5319/55022/6517/23433/57761/115584/200010/6515/25999/83667/9370/6506/2688/6518/7124/1909/6526/6524/5458/286753/155184/2695/5473/81031/1812/50651/55600/26291/338557/1906/154091/144195/6514/718/5579/6523/3553/344901
493	group_GSEA_Go_BP.csv	GO:0031644	GO:0031644	regulation of neurological system process	133	-0.586388	-1.2623	0.000999001	0.0293189	0.0257191	3678	tags=33%, list=20%, signal=27%	7133/552/2257/1143/5020/4846/2693/400746/3673/885/3082/27092/11280/10874/4988/4887/4923/112755/22941/50944/80763/7476/2902/27091/18/2906/11202/6348/1906/56923/9699/183/7432/5999/7143/55273/4884/55/9378/81832/57502/22999/3358/6663
494	group_GSEA_Go_BP.csv	GO:0097529	GO:0097529	myeloid leukocyte migration	199	-0.586569	-1.27126	0.000999001	0.0293189	0.0257191	3587	tags=36%, list=19%, signal=30%	57126/3680/6359/27179/6346/3557/3672/5657/27178/120425/3071/6357/6374/6280/56300/4345/8600/6364/7857/2321/3576/84639/64805/6360/9750/6288/284340/5880/3569/79148/6355/3554/7424/6369/5197/5919/683/5175/9353/729230/5473/4283/6352/10563/5054/6354/2207/2660/6356/54209/6348/3579/1906/5155/7042/1908/6373/6850/4920/3627/5196/6347/7941/5294/26585/6387/26525/2358/27177/10344/3553/1240
495	group_GSEA_Go_BP.csv	GO:0002367	GO:0002367	cytokine production involved in immune response	101	-0.586597	-1.2557	0.00799201	0.114228	0.100203	3955	tags=34%, list=21%, signal=27%	3718/23586/7133/9865/8807/1178/7124/8809/3135/30009/10225/684/2625/3606/7040/7292/3569/3554/3456/335/10417/729230/91543/2207/64127/7042/2865/11213/7097/284/114548/2150/948/3553
496	group_GSEA_Go_BP.csv	GO:1904063	GO:1904063	negative regulation of cation transmembrane transport	80	-0.586855	-1.24919	0.018	0.175973	0.154367	4207	tags=38%, list=22%, signal=29%	100507027/5997/7779/288/859/88/2257/10345/57520/255738/7040/4923/2048/1813/3792/1394/130497/3757/1193/2946/4318/477/6236/150/5999/23704/10008/5350/6588/28954
497	group_GSEA_Go_BP.csv	GO:0050710	GO:0050710	negative regulation of cytokine secretion	66	-0.586966	-1.23711	0.033	0.24444	0.214428	5438	tags=52%, list=29%, signal=37%	7114/23208/3586/5552/7128/2335/9466/5734/55366/353514/2213/59082/284297/440068/7850/2693/4345/7124/384/51311/1149/9971/335/152138/114769/7293/338557/26191/2633/284/114899/114548/2150/26525
498	group_GSEA_Go_BP.csv	GO:0006813	GO:0006813	potassium ion transport	229	-0.587026	-1.27548	0.000999001	0.0293189	0.0257191	4572	tags=45%, list=24%, signal=34%	157855/287/6507/65266/3748/3759/3750/3784/10142/3769/3766/3767/440699/27094/84679/610/285335/288/3747/859/3746/3744/9424/2645/9132/88/57468/3786/60598/2273/5349/4846/388591/3762/3754/3764/496/776/348980/3775/27133/3249/3738/6616/3787/54207/27345/3356/3745/64805/3778/6550/30820/3763/3785/93107/3777/3736/9472/480/25769/3768/3772/150160/284525/6833/8645/100134444/486/3760/3758/1813/3792/1812/6557/37…
499	group_GSEA_Go_BP.csv	GO:0003013	GO:0003013	circulatory system process	525	-0.587044	-1.28636	0.000999001	0.0293189	0.0257191	4427	tags=41%, list=24%, signal=32%	3759/3750/2303/3784/10142/551/388125/778/29119/7422/257313/492/8862/10848/3717/1827/3383/1907/3558/5997/3767/57835/846/10699/91608/566/57731/2982/186/859/774/6543/552/9424/5023/2257/6505/10345/7139/1401/7349/2266/5468/60598/6331/3672/5020/5349/4846/388591/148/9370/8048/8913/4634/3762/6261/3728/6518/3764/776/3817/53822/2626/170690/1621/27092/1956/50507/1824/1909/4018/54567/66002/1268/59272/1005060…
500	group_GSEA_Go_BP.csv	GO:0072503	GO:0072503	cellular divalent inorganic cation homeostasis	479	-0.587182	-1.28496	0.000999001	0.0293189	0.0257191	3686	tags=34%, list=20%, signal=28%	79054/859/6543/552/55630/799/6359/5023/10345/1235/10161/2247/2769/6346/9170/79608/887/5020/6357/148/8048/6280/2898/6261/1234/111/5031/776/7052/126306/1909/1268/958/57338/728215/10874/2833/5745/1233/1991/2829/3356/643/7040/844/4887/89885/5030/9001/5156/187/4923/5731/7224/100133941/1903/6288/7781/57214/5330/9247/6355/2780/3777/4499/9472/25769/8989/2828/7223/2587/2890/9256/1816/56302/6262/797/729230…
501	group_GSEA_Go_BP.csv	GO:0043279	GO:0043279	response to alkaloid	111	-0.587316	-1.26118	0.004995	0.0837585	0.0734746	3296	tags=31%, list=18%, signal=25%	221935/84557/5468/590/1141/5020/6261/27092/23284/390084/1268/4988/3356/5582/3359/1816/84152/6262/2902/1813/1812/1394/6870/18/2946/6529/6531/5179/5999/779/1392/3351/114/6863
502	group_GSEA_Go_BP.csv	GO:0003015	GO:0003015	heart process	273	-0.587474	-1.28115	0.000999001	0.0293189	0.0257191	4477	tags=42%, list=24%, signal=33%	6546/3759/3750/3784/10142/778/29119/492/8862/10848/3717/1907/3558/5997/3767/10699/57731/186/859/774/6543/552/9424/2257/6505/10345/7139/7349/60598/6331/5020/5349/4846/388591/148/8048/8913/4634/3762/6261/3728/3764/776/53822/2626/27092/50507/1824/59272/100506013/10874/4607/3775/10371/4881/785/1674/844/7068/6330/27302/30820/55799/3777/153/480/6323/3768/5318/6262/486/80763/3760/55800/1813/6327/27091/6…
503	group_GSEA_Go_BP.csv	GO:0090288	GO:0090288	negative regulation of cellular response to growth factor stimulus	144	-0.587826	-1.26862	0.000999001	0.0293189	0.0257191	3889	tags=34%, list=21%, signal=27%	7041/25960/79812/348093/186/81848/7080/4052/2201/114990/6653/2625/1149/7498/63978/7040/3273/9350/203100/6422/1634/390598/91851/9573/402117/9353/25928/8646/94031/64388/50515/375567/10563/124857/2200/9241/168667/183/375387/90993/55959/26585/81792/652991/4036/50964/6423/23213/7471
504	group_GSEA_Go_BP.csv	GO:0007611	GO:0007611	learning or memory	254	-0.58803	-1.27983	0.000999001	0.0293189	0.0257191	3437	tags=31%, list=18%, signal=26%	266743/57468/7349/8997/590/1141/93986/5020/84630/2693/6900/885/9379/1621/1956/1268/627/57338/4803/9162/6326/6616/54207/3356/4761/266977/5582/4923/57030/164312/3274/23237/431707/25769/8484/2890/2048/1816/22941/84152/50944/2695/5743/2902/1813/1812/1394/5803/53358/54112/11202/6356/477/183/4593/7432/6529/7143/84502/1392/7097/8516/5153/1620/56924/114/4776/4914/6547/2904/27023/64220/2740/9378/81832/575…
505	group_GSEA_Go_BP.csv	GO:0008015	GO:0008015	blood circulation	515	-0.588174	-1.28865	0.000999001	0.0293189	0.0257191	4427	tags=42%, list=24%, signal=33%	3759/3750/2303/3784/10142/551/388125/778/29119/7422/257313/492/8862/10848/3717/1827/3383/1907/3558/5997/3767/57835/846/10699/91608/566/57731/2982/186/859/774/6543/552/9424/5023/2257/6505/10345/7139/1401/7349/2266/5468/60598/6331/3672/5020/5349/4846/388591/148/9370/8048/8913/4634/3762/6261/3728/6518/3764/776/3817/53822/2626/170690/1621/27092/1956/1824/1909/4018/54567/66002/1268/59272/100506013/108…
506	group_GSEA_Go_BP.csv	GO:0030595	GO:0030595	leukocyte chemotaxis	216	-0.588217	-1.27697	0.000999001	0.0293189	0.0257191	3554	tags=36%, list=19%, signal=29%	3680/6359/27179/1235/6346/3557/1880/3672/27178/120425/3071/6357/22914/6374/6280/56300/1234/8600/6364/7857/2321/3576/2833/84639/643/6360/9750/6288/284340/5880/3569/79148/6355/7424/6369/5197/5919/683/9353/729230/5473/4283/8740/6352/10563/5054/6354/2207/9547/2660/6356/1901/6348/3579/1906/5155/7042/1908/6373/6850/3627/5196/6347/7941/2155/2150/5294/26585/6387/26525/2358/100528032/27177/10344/3553/1240…
507	group_GSEA_Go_BP.csv	GO:0051209	GO:0051209	release of sequestered calcium ion into cytosol	119	-0.588476	-1.26486	0.00599401	0.0941182	0.0825623	3027	tags=29%, list=16%, signal=25%	6261/1234/5031/126306/57338/3356/7040/844/9001/187/4923/57214/5330/9472/8989/6262/4283/1813/1812/1193/196541/2946/477/6348/9002/6373/4842/84502/3627/3357/775/7070/5350/623/3358
508	group_GSEA_Go_BP.csv	GO:0001756	GO:0001756	somitogenesis	70	-0.588544	-1.244	0.03003	0.233882	0.205166	4386	tags=34%, list=23%, signal=26%	2303/9096/1045/472/2294/10655/4222/85407/5362/10512/28514/6422/9573/441478/5075/84667/1044/5100/4920/6939/3975/27023/6423/4223
509	group_GSEA_Go_BP.csv	GO:0015800	GO:0015800	acidic amino acid transport	66	-0.58858	-1.24051	0.031	0.236428	0.207399	4307	tags=47%, list=23%, signal=36%	27165/4915/54407/8497/6507/551/4763/5027/3766/8564/552/6505/6506/885/6616/4923/80131/57030/246213/6857/4889/9256/7200/18/2917/477/6529/6511/6512/57084/22999
510	group_GSEA_Go_BP.csv	GO:0006801	GO:0006801	superoxide metabolic process	66	-0.589269	-1.24196	0.031	0.236428	0.207399	4793	tags=48%, list=26%, signal=36%	10394/10811/4353/4688/53905/64581/10516/7001/57126/1401/79400/4846/7124/1956/50507/7040/6649/683/5446/4843/1906/183/375387/655/6850/337/50508/2150/124056/2358/4504/948
511	group_GSEA_Go_BP.csv	GO:0060047	GO:0060047	heart contraction	263	-0.589433	-1.28421	0.000999001	0.0293189	0.0257191	4477	tags=43%, list=24%, signal=33%	6546/3759/3750/3784/10142/778/29119/492/8862/10848/3717/1907/3558/5997/3767/10699/57731/186/859/774/6543/552/9424/2257/6505/10345/7139/7349/60598/6331/5020/5349/4846/388591/148/8048/8913/4634/3762/6261/3728/3764/776/53822/2626/27092/1824/59272/100506013/10874/4607/3775/10371/4881/785/1674/844/7068/6330/27302/30820/55799/3777/153/480/6323/3768/5318/6262/486/80763/3760/55800/1813/6327/27091/6870/37…
512	group_GSEA_Go_BP.csv	GO:0051928	GO:0051928	positive regulation of calcium ion transport	119	-0.589556	-1.26718	0.004995	0.0837585	0.0734746	2930	tags=34%, list=16%, signal=29%	799/10345/7349/4638/5031/776/342667/2916/844/9001/187/4923/57214/815/9472/6262/4283/2902/6352/1812/5026/117/2946/6348/5155/9002/2641/920/6373/10008/3627/1392/5159/6347/7225/6387/6781/2847/10268/7070/623
513	group_GSEA_Go_BP.csv	GO:0055074	GO:0055074	calcium ion homeostasis	458	-0.590038	-1.29108	0.000999001	0.0293189	0.0257191	3686	tags=35%, list=20%, signal=29%	79054/859/6543/552/799/6359/5023/10345/1235/10161/2247/2769/6346/54757/9170/79608/887/5020/6357/148/8048/2898/6261/1234/111/5031/776/8600/7052/126306/1909/1268/958/57338/728215/10874/2833/5745/1233/1991/2829/3356/643/7040/844/4887/89885/5030/9001/5156/187/4923/5731/7224/100133941/1903/6288/57214/5330/9247/6355/2780/3777/9472/25769/8989/2828/7223/2587/2890/9256/1816/56302/6262/797/729230/4283/2902…
514	group_GSEA_Go_BP.csv	GO:0051216	GO:0051216	cartilage development	202	-0.590057	-1.27924	0.000999001	0.0293189	0.0257191	3729	tags=36%, list=20%, signal=29%	7481/2261/55790/340260/1294/2247/4322/7483/6935/340419/54360/6662/642658/1116/8091/144347/1291/2736/651/2822/5745/7040/1302/85477/2251/654/9350/2202/27302/1311/81029/7704/3200/1513/1301/860/5081/7476/650/2487/50515/130497/7477/5307/9241/1906/5396/94/81578/655/653/1690/4920/2254/51435/7373/4256/5915/1292/1277/55959/26585/81792/6781/8538/6423/56914/5212/340706/392255/176/23213
515	group_GSEA_Go_BP.csv	GO:0006874	GO:0006874	cellular calcium ion homeostasis	445	-0.590178	-1.29178	0.000999001	0.0293189	0.0257191	3686	tags=35%, list=20%, signal=29%	79054/859/6543/552/799/6359/5023/10345/1235/10161/2247/2769/6346/9170/79608/887/5020/6357/148/8048/2898/6261/1234/111/5031/776/7052/126306/1909/1268/958/57338/728215/10874/2833/5745/1233/1991/2829/3356/643/7040/844/4887/89885/5030/9001/5156/187/4923/5731/7224/100133941/1903/6288/57214/5330/9247/6355/2780/3777/9472/25769/8989/2828/7223/2587/2890/9256/1816/56302/6262/797/729230/4283/2902/1813/3792/…
516	group_GSEA_Go_BP.csv	GO:0050909	GO:0050909	sensory perception of taste	66	-0.590689	-1.24495	0.03	0.233882	0.205166	4395	tags=47%, list=23%, signal=36%	563/6338/50839/259296/259293/346562/285093/259290/259285/132112/259292/50832/50837/54429/1469/50834/6340/5726/50836/50835/5330/3933/2780/50831/5304/1472/338557/40/50838/948/765
517	group_GSEA_Go_BP.csv	GO:0072091	GO:0072091	regulation of stem cell proliferation	63	-0.59071	-1.24383	0.034965	0.251833	0.220913	4807	tags=41%, list=26%, signal=31%	6469/4054/5788/6604/126695/7422/4763/1524/2192/55612/79923/5080/8091/6496/7066/7040/54345/7424/64321/1813/1636/63950/7101/5764/6664/6663
518	group_GSEA_Go_BP.csv	GO:0008645	GO:0008645	hexose transmembrane transport	106	-0.590907	-1.26659	0.00599401	0.0941182	0.0825623	4791	tags=37%, list=26%, signal=28%	2719/5319/55022/6517/23433/57761/115584/200010/6515/25999/83667/9370/6506/2688/6518/7124/1909/6526/6524/5458/286753/155184/2695/5473/81031/1812/50651/55600/26291/338557/1906/154091/144195/6514/718/5579/6523/3553/344901
519	group_GSEA_Go_BP.csv	GO:0003333	GO:0003333	amino acid transmembrane transport	83	-0.59121	-1.25773	0.013013	0.15157	0.13296	4139	tags=41%, list=22%, signal=32%	3766/5997/6519/348932/6505/83884/54716/6506/140679/157724/23428/56301/146167/4923/84889/80131/57030/246213/387700/6539/10630/130497/10991/6534/6536/477/183/5999/340024/6511/55089/6512/151258/57084
520	group_GSEA_Go_BP.csv	GO:0008306	GO:0008306	associative learning	77	-0.591461	-1.25916	0.013	0.15157	0.13296	4148	tags=35%, list=22%, signal=27%	4763/4130/7832/11346/7349/1141/885/1621/6616/4761/164312/3274/1816/84152/50944/2902/1813/1812/1394/477/183/7143/1392/5153/27023/81832/6863
521	group_GSEA_Go_BP.csv	GO:0002685	GO:0002685	regulation of leukocyte migration	188	-0.592371	-1.2818	0.000999001	0.0293189	0.0257191	3149	tags=32%, list=17%, signal=27%	3071/22914/4345/3673/7124/6364/3576/326/2833/1991/84830/7040/6693/64805/9750/284340/5880/3569/79148/6355/3554/7424/6369/90865/5919/683/9353/729230/8740/6352/10563/5054/6354/9547/2660/11035/54209/6348/3579/1906/653/1908/3627/8784/6347/7941/2155/8995/2150/26585/6387/2358/100528032/3204/347/7070/1240/5764/148823/623
522	group_GSEA_Go_BP.csv	GO:0060291	GO:0060291	long-term synaptic potentiation	84	-0.592384	-1.26032	0.011011	0.140748	0.123467	1869	tags=24%, list=10%, signal=22%	1395/23237/25769/2048/22941/50944/2695/1813/1812/1394/2906/10590/7143/1392/7101/114/4776/6547/2904/5764
523	group_GSEA_Go_BP.csv	GO:2001259	GO:2001259	positive regulation of cation channel activity	68	-0.5931	-1.25323	0.029	0.23039	0.202103	5384	tags=57%, list=29%, signal=41%	65018/84766/57158/9992/10368/3458/5649/30845/287/6769/3767/440699/288/3747/3746/88/10345/388591/5031/27092/342667/844/9001/4923/3736/644139/9472/23237/2048/729230/2946/54209/389816/10369/1520/10008/6347/51083/126755
524	group_GSEA_Go_BP.csv	GO:0072163	GO:0072163	mesonephric epithelium development	98	-0.593375	-1.26931	0.003996	0.0732048	0.0642167	5049	tags=50%, list=27%, signal=37%	2296/2260/3611/652/6469/2719/2303/51804/7422/55366/793/7482/7481/5979/186/5727/5076/2247/10220/3911/6662/5087/170690/10409/2625/384/7484/7040/9350/7475/6422/2138/7490/80000/55083/8642/650/9353/2246/130497/9241/168667/3237/183/655/2263/5915/3975/7471
525	group_GSEA_Go_BP.csv	GO:0072164	GO:0072164	mesonephric tubule development	98	-0.593375	-1.26931	0.003996	0.0732048	0.0642167	5049	tags=50%, list=27%, signal=37%	2296/2260/3611/652/6469/2719/2303/51804/7422/55366/793/7482/7481/5979/186/5727/5076/2247/10220/3911/6662/5087/170690/10409/2625/384/7484/7040/9350/7475/6422/2138/7490/80000/55083/8642/650/9353/2246/130497/9241/168667/3237/183/655/2263/5915/3975/7471
526	group_GSEA_Go_BP.csv	GO:0019730	GO:0019730	antimicrobial humoral response	109	-0.593526	-1.27348	0.004995	0.0837585	0.0734746	3312	tags=41%, list=18%, signal=34%	85569/5657/6407/78989/6357/6374/6280/130120/5068/5650/80341/3576/10578/25818/92747/1991/6039/3273/1755/117159/5266/5197/5919/5225/10417/11005/5646/5320/5473/4283/671/10563/1511/55600/730249/3346/3934/6373/3627/5196/57119/140683/26525/3347/81623
527	group_GSEA_Go_BP.csv	GO:0050819	GO:0050819	negative regulation of coagulation	54	-0.593575	-1.24184	0.0400802	0.26573	0.233104	3603	tags=37%, list=19%, signal=30%	5340/2266/3848/222537/4846/84830/3273/5156/170692/18/5328/5054/2191/1906/5155/7035/10544/710/7056/5055
528	group_GSEA_Go_BP.csv	GO:0090183	GO:0090183	regulation of kidney development	55	-0.593698	-1.24148	0.0431727	0.275856	0.241986	4853	tags=51%, list=26%, signal=38%	652/6469/5154/51804/7422/55366/7482/5979/186/5076/9370/6662/10409/2625/7484/7040/100133941/79727/7490/8710/130497/9241/4318/5155/183/655/5159/3975
529	group_GSEA_Go_BP.csv	GO:0031646	GO:0031646	positive regulation of neurological system process	62	-0.593899	-1.24881	0.034	0.248735	0.218195	2991	tags=31%, list=16%, signal=26%	400746/3673/885/3082/10874/4923/112755/22941/50944/7476/2902/18/9699/5999/7143/9378/81832/22999/6663
530	group_GSEA_Go_BP.csv	GO:0051588	GO:0051588	regulation of neurotransmitter transport	136	-0.593969	-1.27925	0.000999001	0.0293189	0.0257191	4314	tags=40%, list=23%, signal=31%	5071/8862/4763/5027/6855/5997/8564/7779/6623/5023/321/1143/3690/6853/1141/148/91683/776/8600/1268/8938/9162/1137/27345/3356/339302/9515/5865/5582/5030/4923/815/143425/112755/9627/6857/8973/7200/7476/1813/1812/18/477/9699/1129/6529/5999/4842/1392/23025/3351/5579/9900/22999/3358
531	group_GSEA_Go_BP.csv	GO:0002920	GO:0002920	regulation of humoral immune response	70	-0.593989	-1.25551	0.023023	0.202702	0.177814	3633	tags=40%, list=19%, signal=32%	725/2213/1380/720/55061/731/7124/730/717/5650/25818/732/57829/3078/5225/3075/11005/1370/10563/716/730249/922/710/3426/2/718/10877/3553
532	group_GSEA_Go_BP.csv	GO:0031663	GO:0031663	lipopolysaccharide-mediated signaling pathway	58	-0.594072	-1.24663	0.04004	0.26573	0.233104	3174	tags=29%, list=17%, signal=24%	3055/4846/7124/3606/7040/654/114769/23643/671/6352/730249/6348/26191/7097/6347/948/3553
533	group_GSEA_Go_BP.csv	GO:0007632	GO:0007632	visual behavior	52	-0.594359	-1.24187	0.0461384	0.284477	0.249548	3218	tags=37%, list=17%, signal=30%	3198/65009/4763/11346/1141/6506/885/1621/164312/3274/84152/2902/1813/1812/1394/477/5153/27023/81832
534	group_GSEA_Go_BP.csv	GO:0060402	GO:0060402	calcium ion transport into cytosol	153	-0.594417	-1.28376	0.000999001	0.0293189	0.0257191	3127	tags=31%, list=17%, signal=26%	148/6261/1234/5031/126306/57338/728215/3356/7040/844/9001/187/4923/57214/5330/9472/8989/56302/6262/4283/2902/1813/1812/5026/2906/117/1193/196541/2946/477/6348/9002/920/6373/4842/84502/3627/55503/3357/6547/10268/2904/775/7070/5350/623/3358
535	group_GSEA_Go_BP.csv	GO:0048565	GO:0048565	digestive tract development	132	-0.594439	-1.27901	0.000999001	0.0293189	0.0257191	4853	tags=43%, list=26%, signal=32%	652/5021/2304/6469/83881/51208/26160/3142/55366/1045/56034/2294/579/91461/688/429/348093/1600/7481/5979/2255/887/8626/2049/7124/2626/2736/1956/3576/93649/7040/60529/5156/5125/6422/3274/5919/64321/8642/4821/4852/2300/7042/639/445/2263/2254/5915/79827/7547/137814/6423/64220/1281/140628/6664/6663
536	group_GSEA_Go_BP.csv	GO:0061337	GO:0061337	cardiac conduction	140	-0.594546	-1.28123	0.000999001	0.0293189	0.0257191	4561	tags=48%, list=24%, signal=36%	287/6546/3759/3750/3784/10142/778/29119/492/3767/10699/57731/6543/9424/10345/60598/6331/5349/388591/8913/3762/6261/3728/776/53822/27092/1824/59272/3775/4881/785/844/125111/6330/30820/55799/3777/480/3768/5318/6262/486/3760/55800/6327/27091/3757/477/59284/2697/10369/183/3751/23704/4842/10008/779/3761/482/59283/59285/6336/6547/10021/775/5350/1482
537	group_GSEA_Go_BP.csv	GO:0034103	GO:0034103	regulation of tissue remodeling	73	-0.594594	-1.26329	0.022	0.196222	0.17213	4982	tags=47%, list=27%, signal=34%	2324/952/7128/4054/9464/3375/51208/4763/5027/3558/632/3953/3690/9066/8600/1956/53832/3606/7040/3273/6696/3635/5166/3569/6422/4982/1901/2697/183/6850/26585/4160/338773/81501
538	group_GSEA_Go_BP.csv	GO:0001658	GO:0001658	branching involved in ureteric bud morphogenesis	59	-0.594746	-1.24924	0.039039	0.263676	0.231301	5627	tags=58%, list=30%, signal=40%	2668/10736/56998/30812/3611/652/6469/2719/51804/7422/55366/7482/186/5727/5076/2247/3911/6662/5087/170690/7484/7040/7475/2138/7490/80000/8642/650/2246/9241/3237/183/3975/7471
539	group_GSEA_Go_BP.csv	GO:0010469	GO:0010469	regulation of signaling receptor activity	168	-0.594904	-1.28712	0.000999001	0.0293189	0.0257191	3684	tags=34%, list=20%, signal=28%	186/859/2213/799/88/100463488/58530/1950/27092/255738/4988/100288485/100463482/7039/100463285/255324/160065/149111/23237/66004/100463486/2893/2890/2048/22941/50944/4747/729230/2902/64388/27091/2892/5328/5054/124857/9241/59284/10369/150/387837/1081/1392/2069/6347/306/146395/59283/440829/2891/26585/10268/2904/4884/23641/100462977/27122/81832
540	group_GSEA_Go_BP.csv	GO:0009880	GO:0009880	embryonic pattern specification	62	-0.595049	-1.25123	0.033	0.24444	0.214428	5032	tags=47%, list=27%, signal=34%	497189/84976/6862/92129/6469/80055/8829/5727/2066/2255/344022/163589/4222/10409/10371/28514/7704/7490/9573/441478/7476/6493/655/5046/2263/3975/53820/4223/7471
541	group_GSEA_Go_BP.csv	GO:0015807	GO:0015807	L-amino acid transport	64	-0.59541	-1.2543	0.027	0.220242	0.1932	4693	tags=42%, list=25%, signal=32%	153201/6507/9056/3766/5997/6519/6505/83884/54716/6506/388662/140679/157724/23428/56301/4923/84889/57030/246213/10991/6536/477/183/5999/6511/6512/57084
542	group_GSEA_Go_BP.csv	GO:0060675	GO:0060675	ureteric bud morphogenesis	65	-0.595935	-1.25564	0.025	0.211068	0.185153	5627	tags=57%, list=30%, signal=40%	2668/10736/56998/30812/3611/652/6469/2719/51804/7422/55366/7482/7481/186/5727/5076/2247/3911/6662/5087/170690/2625/7484/7040/7475/2138/7490/80000/55083/8642/650/2246/9241/3237/183/3975/7471
543	group_GSEA_Go_BP.csv	GO:0035773	GO:0035773	insulin secretion involved in cellular response to glucose stimulus	63	-0.596143	-1.25527	0.02997	0.233882	0.205166	3324	tags=27%, list=18%, signal=22%	1946/222546/111/57393/2822/8938/55107/5798/9971/2850/7447/150/2641/1392/114/5799/3170
544	group_GSEA_Go_BP.csv	GO:1904659	GO:1904659	glucose transmembrane transport	102	-0.596297	-1.27656	0.004995	0.0837585	0.0734746	4791	tags=37%, list=26%, signal=28%	2719/5319/55022/6517/23433/57761/115584/200010/6515/25999/83667/9370/6506/2688/6518/7124/1909/6526/6524/5458/286753/2695/5473/81031/1812/50651/55600/26291/338557/1906/154091/144195/6514/718/5579/6523/3553/344901
545	group_GSEA_Go_BP.csv	GO:0010830	GO:0010830	regulation of myotube differentiation	53	-0.596612	-1.247	0.0381143	0.260401	0.228429	4041	tags=36%, list=22%, signal=28%	56203/493829/859/4656/575/963/627/6899/93649/168620/92304/9750/221662/4283/8740/3627/338773/1482/7494
546	group_GSEA_Go_BP.csv	GO:0006835	GO:0006835	dicarboxylic acid transport	96	-0.596701	-1.27519	0.002	0.0457645	0.0401455	4307	tags=40%, list=23%, signal=31%	551/4763/5027/3766/113235/8564/89874/552/6505/9058/65012/64849/6506/2350/885/6616/284111/4923/2352/80131/57030/246213/115111/6857/4889/9256/7200/18/9356/2917/5172/477/6511/6512/57084/115019/4036/22999
547	group_GSEA_Go_BP.csv	GO:2001257	GO:2001257	regulation of cation channel activity	168	-0.596855	-1.29134	0.000999001	0.0293189	0.0257191	2792	tags=32%, list=15%, signal=27%	27092/342667/126306/57338/4988/3787/785/844/9001/4923/3736/644139/9472/149111/23237/2893/2890/2048/22941/50944/4747/729230/2902/1813/27091/2892/1394/1193/2946/4318/54209/6236/59284/389816/10369/1520/23704/4842/84502/10008/1392/6347/306/146395/59283/51083/440829/2891/126755/2904/5350/81832/28954
548	group_GSEA_Go_BP.csv	GO:0001657	GO:0001657	ureteric bud development	97	-0.597023	-1.27582	0.002	0.0457645	0.0401455	5049	tags=51%, list=27%, signal=37%	2296/2260/3611/652/6469/2719/2303/51804/7422/55366/793/7482/7481/5979/186/5727/5076/2247/10220/3911/6662/5087/170690/10409/2625/384/7484/7040/9350/7475/6422/2138/7490/80000/55083/8642/650/9353/2246/130497/9241/168667/3237/183/655/2263/5915/3975/7471
549	group_GSEA_Go_BP.csv	GO:0003073	GO:0003073	regulation of systemic arterial blood pressure	90	-0.597192	-1.27362	0.009	0.12375	0.108556	4098	tags=48%, list=22%, signal=38%	1907/57835/10699/91608/186/552/9424/4846/148/6518/3817/170690/66002/59272/367/1215/4923/3816/8529/5125/2028/153/1816/155/80763/1813/1511/56670/81285/1636/1359/185/2697/1906/5155/183/1908/40/1392/2150/10631/4879/5972
550	group_GSEA_Go_BP.csv	GO:0015872	GO:0015872	dopamine transport	52	-0.597209	-1.24782	0.0431294	0.27585	0.241981	5764	tags=71%, list=31%, signal=49%	120793/2668/1815/23208/65018/127833/225689/390155/120796/5071/26281/6623/1133/1141/341359/9066/91683/6861/390084/1268/84258/1137/3356/5865/4887/143425/6857/8973/1813/1812/6581/18/3737/6531/148281/3351/6387
551	group_GSEA_Go_BP.csv	GO:0006855	GO:0006855	drug transmembrane transport	81	-0.597897	-1.27347	0.009	0.12375	0.108556	4139	tags=37%, list=22%, signal=29%	3766/113235/5997/6005/6582/6505/5205/83884/64849/6506/2350/56918/284111/4923/84889/57030/246213/387700/80704/6581/10991/477/183/5999/6511/6512/358/57084/4036/64220
552	group_GSEA_Go_BP.csv	GO:0030166	GO:0030166	proteoglycan biosynthetic process	69	-0.59832	-1.2643	0.021	0.190965	0.167518	4592	tags=39%, list=24%, signal=30%	56548/92126/166012/1463/63827/79690/55790/64711/266722/222537/54360/29940/64579/1464/1634/83539/50515/64131/2300/9951/9953/633/51363/9956/1462/176/9955
553	group_GSEA_Go_BP.csv	GO:0030193	GO:0030193	regulation of blood coagulation	78	-0.598464	-1.27318	0.008	0.114228	0.100203	3326	tags=33%, list=18%, signal=28%	2266/3848/2152/4846/2039/84830/3273/5156/170692/10630/18/5328/5054/2207/2191/1906/5155/7035/6850/710/2155/7056/2150/5055/948/3170
554	group_GSEA_Go_BP.csv	GO:0055123	GO:0055123	digestive system development	144	-0.598653	-1.29199	0.000999001	0.0293189	0.0257191	4853	tags=43%, list=26%, signal=32%	652/5021/2304/6469/83881/51208/26160/3142/55366/1045/56034/2294/1990/579/91461/688/429/348093/1600/7481/5979/2255/887/8626/2049/7124/2626/2736/1956/3576/3481/93649/7040/60529/5156/5125/6422/3274/5919/64321/2695/8642/4821/4852/2300/7042/639/445/56033/2263/2254/5915/79827/7547/137814/6423/64220/1281/140628/6664/7494/6663
555	group_GSEA_Go_BP.csv	GO:0007566	GO:0007566	embryo implantation	47	-0.598862	-1.24568	0.0482897	0.293845	0.257767	2629	tags=26%, list=14%, signal=22%	100506013/63978/6696/5125/5618/397/5743/730249/5740/4318/6781/3553
556	group_GSEA_Go_BP.csv	GO:0050921	GO:0050921	positive regulation of chemotaxis	134	-0.599307	-1.29092	0.000999001	0.0293189	0.0257191	3485	tags=37%, list=19%, signal=30%	1235/2247/6346/2255/2152/3071/3673/7857/3576/1233/7040/64805/9750/284340/5880/3569/7424/5919/9353/729230/8740/6352/10563/4916/56670/5054/6354/9547/2660/1901/54209/6348/3579/1906/5155/1826/1908/64094/3627/5159/7941/2155/2150/6387/2358/1012/10344/1240/5764
557	group_GSEA_Go_BP.csv	GO:0072676	GO:0072676	lymphocyte migration	106	-0.599579	-1.28518	0.003996	0.0732048	0.0642167	3804	tags=39%, list=20%, signal=31%	9420/5979/6359/1235/6346/1880/6357/22914/4345/6364/30009/326/2833/2625/84830/6693/6360/7535/9750/6288/6355/6369/729230/8740/6352/10563/6354/9547/11035/6356/1901/6348/6373/3627/6347/5294/6387/100528032/347/10344/148823
558	group_GSEA_Go_BP.csv	GO:0072171	GO:0072171	mesonephric tubule morphogenesis	66	-0.599771	-1.2641	0.025	0.211068	0.185153	5627	tags=58%, list=30%, signal=40%	2668/10736/56998/30812/3611/652/6469/2719/51804/7422/55366/7482/7481/186/5727/5076/2247/3911/6662/5087/170690/2625/7484/7040/7475/2138/7490/80000/55083/8642/650/2246/130497/9241/3237/183/3975/7471
559	group_GSEA_Go_BP.csv	GO:0090101	GO:0090101	negative regulation of transmembrane receptor protein serine/threonine kinase signaling pathway	114	-0.599914	-1.28942	0.001998	0.0457645	0.0401455	3484	tags=32%, list=19%, signal=26%	7080/8483/4052/10468/2201/114990/6653/1149/7040/9350/203100/6422/390598/91851/9573/402117/25928/8646/94031/64388/50515/375567/124857/2200/9241/168667/375387/3547/26585/652991/4036/50964/6423/168002/57057/7471
560	group_GSEA_Go_BP.csv	GO:0045123	GO:0045123	cellular extravasation	60	-0.599993	-1.25987	0.0260521	0.216015	0.189492	4365	tags=43%, list=23%, signal=33%	5734/3383/1524/566/57126/83483/3672/5657/120425/7124/119/1991/6693/9750/2650/3554/683/5175/729230/6401/11035/7412/6347/5294/6387/7070
561	group_GSEA_Go_BP.csv	GO:1904645	GO:1904645	response to amyloid-beta	46	-0.600243	-1.24858	0.0492958	0.296366	0.259978	1435	tags=35%, list=8%, signal=32%	3383/2043/774/2213/799/4322/1759/773/4314/4318/54209/7412/10268/2358/4321/948
562	group_GSEA_Go_BP.csv	GO:0060389	GO:0060389	pathway-restricted SMAD protein phosphorylation	64	-0.600784	-1.26562	0.021	0.190965	0.167518	3638	tags=33%, list=19%, signal=27%	151449/83729/10220/651/7040/654/27302/3624/2662/9573/650/2660/9241/3625/168667/94/7042/655/653/26585/392255
563	group_GSEA_Go_BP.csv	GO:0050729	GO:0050729	positive regulation of inflammatory response	134	-0.601452	-1.29554	0.000999001	0.0293189	0.0257191	4365	tags=43%, list=23%, signal=33%	5734/3572/388125/3929/3717/3558/9180/81793/112744/353514/1051/84699/5603/115362/6346/6280/84630/3673/8600/7124/7052/1956/1268/338322/3606/1050/26471/53342/5008/7292/51284/3569/6369/90865/4889/145741/5743/5320/729230/56670/5054/2207/5733/54209/185/6348/9173/64127/183/2865/7097/7941/5294/718/4023/3553/3620/6863
564	group_GSEA_Go_BP.csv	GO:0045840	GO:0045840	positive regulation of mitotic nuclear division	52	-0.601503	-1.25679	0.0371113	0.258154	0.226458	2936	tags=23%, list=16%, signal=20%	1950/3481/7040/7039/255324/1906/5155/1908/5159/2069/3552/3553
565	group_GSEA_Go_BP.csv	GO:0051937	GO:0051937	catecholamine transport	77	-0.601511	-1.28055	0.005	0.0837585	0.0734746	3899	tags=66%, list=21%, signal=53%	2668/1815/9607/23208/65018/151/127833/225689/390155/5021/120796/5071/26281/6623/1133/186/7349/1141/341359/9066/5020/2693/91683/6861/390084/1268/84258/1137/3356/3745/5865/4887/64805/143425/6857/8973/1813/1812/6581/1394/18/3737/183/150/7432/6531/2865/1392/148281/3351/6387
566	group_GSEA_Go_BP.csv	GO:1905517	GO:1905517	macrophage migration	48	-0.601564	-1.25351	0.0462777	0.284796	0.249828	2135	tags=27%, list=11%, signal=24%	64805/6288/284340/79148/5919/729230/6352/2660/54209/6348/4920/6347/1240
567	group_GSEA_Go_BP.csv	GO:0003208	GO:0003208	cardiac ventricle morphogenesis	72	-0.601598	-1.27518	0.012012	0.146842	0.128813	3092	tags=49%, list=16%, signal=41%	4208/2296/23414/9464/7135/6604/2303/5629/10848/2294/7139/4634/2626/23462/54567/10512/4607/2625/7040/4887/27302/4889/1301/5318/6262/26508/9241/7042/2263/6910/4036/6423/1482/57057/6664
568	group_GSEA_Go_BP.csv	GO:0007631	GO:0007631	feeding behavior	101	-0.601791	-1.28823	0.002997	0.0595489	0.0522375	3776	tags=42%, list=20%, signal=33%	390259/3953/51761/7349/1141/5020/1602/2693/885/1268/59272/10874/4988/680/4887/391723/4889/8484/389400/7200/1271/2902/1813/1812/1394/6870/4852/7345/56923/183/84251/2641/3062/79924/6939/51083/3351/2847/64220/4160/5972/3358
569	group_GSEA_Go_BP.csv	GO:0006023	GO:0006023	aminoglycan biosynthetic process	114	-0.601826	-1.29353	0.001998	0.0457645	0.0401455	2551	tags=39%, list=14%, signal=34%	4969/2719/9435/56548/3038/5549/92126/166012/1463/63827/11081/374907/55790/64711/222537/1950/29940/84752/64579/7040/10082/57214/4958/1464/6383/1634/10331/83539/50515/64131/5155/3036/5159/284/9953/633/51363/9956/1462/3553/176/11227/9955/2331
570	group_GSEA_Go_BP.csv	GO:0001823	GO:0001823	mesonephros development	102	-0.601868	-1.28849	0.002997	0.0595489	0.0522375	5049	tags=51%, list=27%, signal=37%	2296/2260/3611/652/6469/2719/2303/51804/7422/55366/793/7482/7481/5979/186/5727/5076/2247/2255/10220/3911/6662/5087/170690/10409/2625/384/7484/7040/9350/7475/7704/6422/2138/7490/80000/55083/8642/650/9353/2246/130497/9241/168667/3237/183/655/2263/5915/3975/5972/7471
571	group_GSEA_Go_BP.csv	GO:1903522	GO:1903522	regulation of blood circulation	280	-0.601948	-1.3122	0.000999001	0.0293189	0.0257191	4427	tags=45%, list=24%, signal=35%	3759/3750/3784/10142/551/778/29119/492/8862/3717/3383/1907/3558/5997/3767/846/10699/57731/186/859/774/6543/552/9424/5023/6505/10345/7139/7349/2266/60598/6331/5020/5349/4846/388591/148/8048/8913/4634/3762/6261/3728/776/53822/2626/1621/27092/1956/1824/59272/100506013/10874/3775/10371/4881/785/27345/3356/1674/844/7068/125111/6330/1131/27302/30820/55799/3777/153/3274/480/3768/5318/6262/486/80763/5743…
572	group_GSEA_Go_BP.csv	GO:0070268	GO:0070268	cornification	112	-0.602013	-1.29342	0.001998	0.0457645	0.0401455	4430	tags=54%, list=24%, signal=42%	3868/3886/6701/3855/3872/8689/43849/643418/3883/8688/3891/3854/140807/6698/25984/3890/3875/3848/353131/286887/3882/3889/3728/5493/1824/8687/23581/25818/340654/3881/9119/51350/6700/3887/5266/3892/1828/6707/1475/84648/3713/5318/338785/6699/6768/11005/643414/126638/4014/125115/7062/196374/6704/147409/1823/5046/404203/6705/3884/6703/3885
573	group_GSEA_Go_BP.csv	GO:0035904	GO:0035904	aorta development	53	-0.602556	-1.25942	0.0351053	0.252007	0.221066	3203	tags=28%, list=17%, signal=24%	4638/4052/23462/54567/6899/2138/4015/94/7042/639/4016/5159/4036/7021/1281
574	group_GSEA_Go_BP.csv	GO:0061053	GO:0061053	somite development	89	-0.602746	-1.28645	0.00599401	0.0941182	0.0825623	4386	tags=37%, list=23%, signal=29%	2303/9096/51804/1045/472/2294/10655/84695/7481/5727/4222/642658/85407/5362/10512/28514/6422/9573/441478/2487/5075/84667/9241/1044/5100/4920/6939/3975/27023/6423/4223/7471/6664
575	group_GSEA_Go_BP.csv	GO:0010522	GO:0010522	regulation of calcium ion transport into cytosol	98	-0.603132	-1.29018	0.001998	0.0457645	0.0401455	2930	tags=32%, list=16%, signal=27%	5031/126306/57338/7040/844/9001/187/4923/57214/9472/6262/4283/2902/1812/5026/117/1193/196541/2946/477/9002/920/6373/4842/84502/3627/10268/775/7070/5350/623
576	group_GSEA_Go_BP.csv	GO:1900046	GO:1900046	regulation of hemostasis	79	-0.603144	-1.28381	0.004	0.0732048	0.0642167	3326	tags=34%, list=18%, signal=28%	2266/3848/2152/4846/2039/84830/3273/5156/1311/170692/10630/18/5328/5054/2207/2191/1906/5155/7035/6850/710/2155/7056/2150/5055/948/3170
577	group_GSEA_Go_BP.csv	GO:0051145	GO:0051145	smooth muscle cell differentiation	54	-0.603191	-1.26196	0.0310621	0.236428	0.207399	5155	tags=48%, list=27%, signal=35%	4208/1491/652/6469/27250/6604/4773/7422/2294/348093/2255/6935/93166/6662/23462/79652/93649/7040/10266/1311/5155/2263/2254/2069/8516/4776
578	group_GSEA_Go_BP.csv	GO:0097530	GO:0097530	granulocyte migration	135	-0.603229	-1.29919	0.000999001	0.0293189	0.0257191	3587	tags=41%, list=19%, signal=34%	57126/3680/6359/27179/6346/3557/3672/5657/27178/120425/3071/6357/6374/6280/56300/6364/7857/3576/84639/6360/9750/6288/284340/5880/6355/3554/6369/5197/5919/683/5175/9353/5473/4283/6352/10563/6354/2207/2660/6356/6348/3579/1906/7042/1908/6373/6850/3627/5196/6347/5294/26525/27177/10344/3553/1240
579	group_GSEA_Go_BP.csv	GO:0060191	GO:0060191	regulation of lipase activity	95	-0.603399	-1.28916	0.002	0.0457645	0.0401455	3786	tags=44%, list=20%, signal=35%	440503/2261/552/7294/2247/2769/10316/9170/148/5031/1956/1909/627/2321/728113/3356/5156/64805/5125/5330/335/653145/6352/341/6401/4916/117/8698/5322/344/185/56923/183/5046/2263/5159/337/3357/395/4023/5406/3990
580	group_GSEA_Go_BP.csv	GO:0060351	GO:0060351	cartilage development involved in endochondral bone morphogenesis	46	-0.603448	-1.25525	0.0402414	0.26573	0.233104	845	tags=35%, list=5%, signal=33%	1294/4322/6662/1291/9350/1311/81578/1690/51435/7373/5915/1292/1277/6781/5212/340706
581	group_GSEA_Go_BP.csv	GO:0086001	GO:0086001	cardiac muscle cell action potential	67	-0.603922	-1.27447	0.019019	0.180734	0.158544	4561	tags=51%, list=24%, signal=39%	481/287/6546/3759/3784/10142/29119/610/288/859/2257/6331/388591/8913/3762/3728/3764/776/1824/6330/6323/5318/6262/3760/55800/6327/3757/477/2697/23704/10008/6336/10021/775
582	group_GSEA_Go_BP.csv	GO:0061035	GO:0061035	regulation of cartilage development	66	-0.604224	-1.27348	0.02	0.184642	0.161972	5921	tags=55%, list=32%, signal=37%	7474/6591/4192/10736/649/7227/4017/5744/6660/8200/652/4054/579/91461/7481/7483/6662/642658/144347/2736/7040/85477/654/2202/27302/7704/1513/860/650/2487/9241/94/5915/26585/81792/392255
583	group_GSEA_Go_BP.csv	GO:0097756	GO:0097756	negative regulation of blood vessel diameter	81	-0.604341	-1.28719	0.005	0.0837585	0.0734746	4977	tags=52%, list=27%, signal=38%	952/553/5021/9732/6546/551/8862/3383/1907/846/552/5023/1401/2266/148/1621/1956/1909/59272/27345/80852/3356/59/1131/1311/3274/1816/5743/3792/1636/477/185/2697/1906/183/150/10242/1908/40/624/3357/3351
584	group_GSEA_Go_BP.csv	GO:0030032	GO:0030032	lamellipodium assembly	61	-0.604505	-1.27013	0.0190381	0.180734	0.158544	2229	tags=21%, list=12%, signal=19%	2039/3273/64805/84448/5880/9353/2660/1901/7401/90167/29984/1012/7471
585	group_GSEA_Go_BP.csv	GO:0055117	GO:0055117	regulation of cardiac muscle contraction	75	-0.604693	-1.28593	0.007	0.103924	0.0911642	4768	tags=45%, list=25%, signal=34%	8654/481/30845/287/6546/3759/3784/10142/29119/5997/859/7349/6331/388591/148/3728/2626/1824/59272/27302/5318/6262/1193/2946/477/4842/10008/5294/6781/6336/10021/775/5350/1482
586	group_GSEA_Go_BP.csv	GO:0021536	GO:0021536	diencephalon development	75	-0.604813	-1.28619	0.007	0.103924	0.0911642	3689	tags=41%, list=20%, signal=33%	3747/3746/219409/5080/7080/2255/1141/2736/6887/10371/6496/6658/9001/2691/650/1813/190/30062/1394/5307/9241/6531/5626/1392/999/139411/137814/27023/26047/7471/5764
587	group_GSEA_Go_BP.csv	GO:2000300	GO:2000300	regulation of synaptic vesicle exocytosis	76	-0.604972	-1.28713	0.005	0.0837585	0.0734746	3548	tags=34%, list=19%, signal=28%	5023/321/6853/1141/148/776/1268/9162/1137/3356/9515/5582/5030/815/143425/112755/6857/8973/7476/1813/1812/9699/1129/3351/5579/22999
588	group_GSEA_Go_BP.csv	GO:0008016	GO:0008016	regulation of heart contraction	235	-0.605	-1.31479	0.000999001	0.0293189	0.0257191	4477	tags=46%, list=24%, signal=35%	6546/3759/3750/3784/10142/778/29119/492/8862/3717/1907/3558/5997/3767/10699/57731/186/859/774/6543/552/9424/6505/10345/7139/7349/60598/6331/5020/5349/4846/388591/148/8048/8913/4634/3762/6261/3728/776/53822/2626/27092/1824/59272/100506013/10874/3775/10371/4881/785/1674/844/7068/125111/6330/27302/30820/55799/3777/153/480/3768/5318/6262/486/80763/3760/55800/1813/6327/27091/6870/3757/1193/2946/477/59…
589	group_GSEA_Go_BP.csv	GO:0046717	GO:0046717	acid secretion	123	-0.605096	-1.3012	0.000999001	0.0293189	0.0257191	4829	tags=51%, list=26%, signal=38%	5021/5319/1579/4828/6507/3784/551/5244/4763/5027/8564/846/1133/186/552/6505/7349/887/5020/6506/885/8600/85413/6754/10874/6616/84647/4923/8529/57030/115111/6857/3274/4889/7223/9256/7200/5320/1813/18/255189/2917/5322/1636/26279/8714/4843/5733/7032/6536/391013/1906/56923/50487/6529/8647/6850/6511/6512/624/9900/3553/22999
590	group_GSEA_Go_BP.csv	GO:0110110	GO:0110110	positive regulation of animal organ morphogenesis	81	-0.605305	-1.28925	0.004	0.0732048	0.0642167	4373	tags=43%, list=23%, signal=33%	265/51804/7422/55366/7482/152816/186/5076/2255/3227/93986/6662/2252/10512/10409/2625/3249/367/7040/7475/27302/7490/650/2246/9241/1906/183/7042/655/2263/10117/3975/140628/5764/7494
591	group_GSEA_Go_BP.csv	GO:2000257	GO:2000257	regulation of protein activation cascade	53	-0.605399	-1.26537	0.0310933	0.236428	0.207399	3633	tags=36%, list=19%, signal=29%	725/1380/720/55061/731/730/717/732/3078/3075/1370/716/922/710/3426/2/718/10877/3553
592	group_GSEA_Go_BP.csv	GO:0060393	GO:0060393	regulation of pathway-restricted SMAD protein phosphorylation	61	-0.605472	-1.27216	0.0180361	0.176061	0.154444	3638	tags=34%, list=19%, signal=28%	151449/83729/10220/651/7040/654/27302/3624/2662/9573/650/2660/9241/3625/168667/94/7042/655/653/26585/392255
593	group_GSEA_Go_BP.csv	GO:0010463	GO:0010463	mesenchymal cell proliferation	44	-0.605817	-1.25692	0.0483384	0.293867	0.257786	5921	tags=64%, list=32%, signal=44%	7474/4487/10736/56998/2249/2260/652/6469/2719/9464/5154/7422/2294/7481/6935/93986/6662/2252/6899/8642/650/8646/130497/5396/655/2263/2254/5764
594	group_GSEA_Go_BP.csv	GO:0002702	GO:0002702	positive regulation of production of molecular mediator of immune response	91	-0.606288	-1.29325	0.003	0.0595489	0.0522375	2826	tags=29%, list=15%, signal=24%	8809/3135/5950/30009/5650/958/25818/2625/3606/7040/7292/3569/3554/90865/5225/10417/7293/91543/2207/64127/2865/114548/2150/948/3553/7494
595	group_GSEA_Go_BP.csv	GO:0051480	GO:0051480	regulation of cytosolic calcium ion concentration	346	-0.606626	-1.32562	0.000999001	0.0293189	0.0257191	3575	tags=38%, list=19%, signal=31%	799/5023/10345/1235/10161/2247/2769/6346/9170/79608/887/5020/148/6261/1234/111/5031/776/7052/126306/1909/1268/57338/728215/10874/2833/5745/1233/2829/3356/643/7040/844/4887/5030/9001/5156/187/4923/5731/7224/100133941/1903/6288/57214/5330/2780/3777/9472/8989/2828/7223/2587/2890/9256/56302/6262/797/729230/4283/2902/1813/773/1043/1812/10563/1394/5026/2906/8477/117/8698/5732/1193/196541/5733/2946/1901…
596	group_GSEA_Go_BP.csv	GO:0051965	GO:0051965	positive regulation of synapse assembly	66	-0.607141	-1.27963	0.016	0.169482	0.148673	4829	tags=55%, list=26%, signal=41%	5021/57408/23768/22859/347731/23769/576/2895/26045/94030/11141/1946/5020/27286/575/2049/158038/23284/627/387804/147381/9746/54674/2048/7476/84189/4916/64084/40/114798/22865/4914/441381/9378/79953/57633
597	group_GSEA_Go_BP.csv	GO:0051148	GO:0051148	negative regulation of muscle cell differentiation	52	-0.607168	-1.26863	0.0310933	0.236428	0.207399	4054	tags=37%, list=22%, signal=29%	5997/8324/493829/348093/859/93166/627/93649/168620/28514/650/5155/5999/3627/2254/2069/338773/1482/7494
598	group_GSEA_Go_BP.csv	GO:0002062	GO:0002062	chondrocyte differentiation	118	-0.607483	-1.30533	0.000999001	0.0293189	0.0257191	3105	tags=50%, list=17%, signal=42%	4017/5744/6660/1293/4208/2260/8200/652/57642/4148/7045/4054/265/1280/7482/579/91461/2261/1294/7483/54360/6662/642658/8091/144347/1291/2736/2822/5745/7040/85477/654/2202/1311/81029/7704/1301/860/7476/650/50515/130497/94/81578/1690/2254/51435/7373/5915/1292/55959/26585/81792/6423/5212/340706/392255/176/23213
599	group_GSEA_Go_BP.csv	GO:0006029	GO:0006029	proteoglycan metabolic process	94	-0.607906	-1.29836	0.002	0.0457645	0.0401455	4438	tags=38%, list=24%, signal=29%	92126/166012/1280/1463/63827/3425/79690/55790/64711/266722/222537/54360/50859/29940/64579/1464/1634/1301/650/83539/50515/64131/2300/9951/133584/55959/23553/9953/81792/633/51363/9956/1462/176/23213/9955
600	group_GSEA_Go_BP.csv	GO:0050994	GO:0050994	regulation of lipid catabolic process	54	-0.607965	-1.27194	0.0260521	0.216015	0.189492	3038	tags=30%, list=16%, signal=25%	225/7124/6653/1268/2822/1149/13/5919/341/26291/344/150/337/5294/85329/3553
601	group_GSEA_Go_BP.csv	GO:0007193	GO:0007193	adenylate cyclase-inhibiting G protein-coupled receptor signaling pathway	86	-0.608117	-1.29562	0.004	0.0732048	0.0642167	4570	tags=45%, list=24%, signal=34%	120796/122042/2861/1902/5997/846/1133/346562/4543/6752/768239/111/1909/390084/2774/2918/4988/2916/4887/1131/64805/1903/5064/1813/3355/2917/1901/1906/1129/150/2913/3361/2865/3351/2899/114/2847/2358/5996
602	group_GSEA_Go_BP.csv	GO:0006942	GO:0006942	regulation of striated muscle contraction	89	-0.608135	-1.29796	0.002997	0.0595489	0.0522375	4768	tags=46%, list=25%, signal=35%	8654/481/7135/30845/287/6546/3759/3784/10142/29119/5997/859/7349/6331/388591/148/4634/3728/2626/1824/59272/4607/844/27302/6329/5318/6262/4608/1193/2946/477/4842/10008/5294/6781/6336/6547/10021/775/5350/1482
603	group_GSEA_Go_BP.csv	GO:0050913	GO:0050913	sensory perception of bitter taste	44	-0.608237	-1.26194	0.0453172	0.282085	0.24745	4395	tags=57%, list=23%, signal=44%	563/50839/259296/259293/346562/285093/259290/259285/132112/259292/50832/50837/54429/1469/50834/5726/50836/50835/5330/2780/50831/5304/1472/50838/765
604	group_GSEA_Go_BP.csv	GO:0050818	GO:0050818	regulation of coagulation	81	-0.608242	-1.2955	0.003	0.0595489	0.0522375	3326	tags=35%, list=18%, signal=29%	2266/3848/2152/222537/4846/2039/84830/3273/5156/170692/10630/18/5328/5054/2207/2191/1906/5155/7035/10544/6850/710/2155/7056/2150/5055/948/3170
605	group_GSEA_Go_BP.csv	GO:0006821	GO:0006821	chloride transport	106	-0.608336	-1.30395	0.001998	0.0457645	0.0401455	4571	tags=47%, list=24%, signal=36%	1183/26285/6507/65266/2565/2563/846/2556/2568/54831/2559/6505/57468/57348/10316/2561/65012/5349/5031/2570/53405/2555/7809/55107/55879/5030/441509/266675/1188/57030/8542/115111/9022/9635/8001/57101/1187/54102/6557/5172/1193/2569/2557/84561/2554/200959/2564/115019/203859/121601
606	group_GSEA_Go_BP.csv	GO:1902475	GO:1902475	L-alpha-amino acid transmembrane transport	50	-0.608427	-1.26872	0.0311558	0.236428	0.207399	4550	tags=42%, list=24%, signal=32%	6507/9056/3766/5997/6505/83884/6506/157724/23428/56301/4923/84889/57030/246213/10991/477/183/5999/6511/6512/57084
607	group_GSEA_Go_BP.csv	GO:2000401	GO:2000401	regulation of lymphocyte migration	62	-0.608501	-1.27952	0.017	0.175146	0.153641	3118	tags=34%, list=17%, signal=28%	22914/4345/6364/326/84830/6693/9750/729230/8740/6352/10563/6354/9547/11035/6348/3627/6347/6387/100528032/347/148823
608	group_GSEA_Go_BP.csv	GO:0001570	GO:0001570	vasculogenesis	77	-0.608524	-1.29549	0.004	0.0732048	0.0642167	2761	tags=27%, list=15%, signal=23%	23462/100506013/7498/93649/7040/10266/187/54345/7490/64321/7476/7075/7477/51666/57007/5159/6910/84700/55273/1482/57057
609	group_GSEA_Go_BP.csv	GO:0043268	GO:0043268	positive regulation of potassium ion transport	45	-0.608525	-1.26332	0.0352467	0.252744	0.221712	4753	tags=58%, list=25%, signal=43%	65268/3753/65267/481/287/65266/3759/3784/10142/440699/3747/3746/88/2273/388591/3736/9472/1812/3757/54209/389816/150/1908/482/51083/126755
610	group_GSEA_Go_BP.csv	GO:0032330	GO:0032330	regulation of chondrocyte differentiation	48	-0.608841	-1.26868	0.0331992	0.245295	0.215178	5836	tags=54%, list=31%, signal=37%	6591/4192/10736/7227/4017/5744/6660/8200/652/4054/579/91461/7483/6662/144347/2736/85477/654/2202/7704/860/94/5915/26585/81792/392255
611	group_GSEA_Go_BP.csv	GO:0008217	GO:0008217	regulation of blood pressure	177	-0.608934	-1.31655	0.000999001	0.0293189	0.0257191	3701	tags=42%, list=20%, signal=34%	2982/186/774/552/9424/5023/7349/5468/5020/4846/148/9370/6518/3817/170690/1909/66002/1268/59272/10874/10911/680/4881/367/80852/10266/28514/59/1215/6296/4923/3816/8529/5125/2028/7424/153/5443/1816/155/80763/5743/1813/6870/1511/18/56670/81285/2837/1636/4852/4843/1359/477/185/2697/1906/5155/183/94/1908/40/4842/2865/79924/1392/2150/10631/4879/5742/5972/2740/1278/623/6863
612	group_GSEA_Go_BP.csv	GO:0050702	GO:0050702	interleukin-1 beta secretion	52	-0.608945	-1.27234	0.0310933	0.236428	0.207399	3467	tags=44%, list=18%, signal=36%	373509/5027/353514/115362/59082/5005/834/440068/384/51311/9447/22861/335/152138/114769/5004/6348/64127/114548/2150/4023/55655/948
613	group_GSEA_Go_BP.csv	GO:0086002	GO:0086002	cardiac muscle cell action potential involved in contraction	50	-0.609176	-1.27029	0.0291457	0.231142	0.202763	4561	tags=52%, list=24%, signal=39%	287/3759/3784/29119/859/2257/6331/388591/8913/3762/3728/3764/776/1824/6330/6323/5318/6262/3760/55800/6327/3757/2697/23704/10008/775
614	group_GSEA_Go_BP.csv	GO:0002687	GO:0002687	positive regulation of leukocyte migration	125	-0.609854	-1.31122	0.000999001	0.0293189	0.0257191	3485	tags=37%, list=19%, signal=30%	1235/6346/83483/3071/3673/7124/6364/3576/1991/7040/6693/64805/9750/284340/5880/3569/6355/3554/7424/6369/5919/729230/8740/6352/10563/5054/6354/9547/2660/54209/6348/3579/1906/1908/3627/8784/7941/2155/8995/2150/6387/2358/7070/1240/5764/623
615	group_GSEA_Go_BP.csv	GO:0030449	GO:0030449	regulation of complement activation	52	-0.609968	-1.27448	0.0310933	0.236428	0.207399	3633	tags=37%, list=19%, signal=30%	725/1380/720/55061/731/730/717/732/3078/3075/1370/716/922/710/3426/2/718/10877/3553
616	group_GSEA_Go_BP.csv	GO:0008542	GO:0008542	visual learning	47	-0.609972	-1.26879	0.0382294	0.260913	0.228879	3218	tags=36%, list=17%, signal=30%	65009/4763/11346/1141/885/1621/164312/3274/84152/2902/1813/1812/1394/477/5153/27023/81832
617	group_GSEA_Go_BP.csv	GO:0050704	GO:0050704	regulation of interleukin-1 secretion	51	-0.610048	-1.27476	0.0310933	0.236428	0.207399	3452	tags=53%, list=18%, signal=43%	10626/7128/260434/373509/5027/353514/59082/5005/834/440068/7850/338322/384/51311/9447/6288/22861/335/152138/114769/5004/6348/64127/114548/4023/116337/55655
618	group_GSEA_Go_BP.csv	GO:0050432	GO:0050432	catecholamine secretion	64	-0.610721	-1.28655	0.016	0.169482	0.148673	3370	tags=67%, list=18%, signal=55%	9607/23208/65018/151/127833/390155/5021/120796/5071/26281/6623/186/7349/1141/341359/9066/5020/2693/91683/6861/390084/1268/84258/1137/3356/3745/4887/64805/143425/6857/8973/1813/1394/18/3737/183/150/7432/2865/1392/148281/3351/6387
619	group_GSEA_Go_BP.csv	GO:0010517	GO:0010517	regulation of phospholipase activity	69	-0.610761	-1.29059	0.009	0.12375	0.108556	3693	tags=48%, list=20%, signal=39%	2261/552/7294/2247/2769/10316/9170/148/5031/1956/1909/627/2321/728113/3356/5156/64805/5330/653145/6352/6401/4916/117/8698/5322/344/185/56923/183/2263/5159/3357/395
620	group_GSEA_Go_BP.csv	GO:0050654	GO:0050654	chondroitin sulfate proteoglycan metabolic process	44	-0.610813	-1.26729	0.0433031	0.276418	0.24248	4592	tags=45%, list=24%, signal=34%	56548/92126/166012/1463/63827/3425/55790/54360/50859/29940/1464/1634/83539/50515/64131/133584/23553/633/51363/1462
621	group_GSEA_Go_BP.csv	GO:0048066	GO:0048066	developmental pigmentation	46	-0.61089	-1.27073	0.0342052	0.249396	0.218775	1189	tags=9%, list=6%, signal=8%	81285/1908/80070/6663
622	group_GSEA_Go_BP.csv	GO:0006024	GO:0006024	glycosaminoglycan biosynthetic process	110	-0.611129	-1.31183	0.000999001	0.0293189	0.0257191	2551	tags=25%, list=14%, signal=21%	29940/64579/7040/10082/57214/4958/1464/6383/1634/10331/83539/50515/64131/5155/3036/5159/284/9953/633/51363/9956/1462/3553/176/11227/9955/2331
623	group_GSEA_Go_BP.csv	GO:0030574	GO:0030574	collagen catabolic process	46	-0.611206	-1.27139	0.0342052	0.249396	0.218775	4380	tags=54%, list=23%, signal=42%	56547/64115/64066/118856/4325/4322/4324/8510/5657/9508/64386/4320/79148/1513/4319/4327/1306/9509/4314/4318/2191/1520/4312/4321/9313
624	group_GSEA_Go_BP.csv	GO:0007613	GO:0007613	memory	116	-0.611679	-1.31452	0.000999001	0.0293189	0.0257191	3647	tags=35%, list=19%, signal=29%	6543/1051/266743/8997/1141/5020/885/1621/1268/627/57338/4803/6326/54207/3356/266977/57030/164312/3274/23237/25769/2890/84152/50944/2695/5743/2902/1813/1812/1394/11202/4593/8516/1620/56924/114/4776/6547/81832/5764/6863
625	group_GSEA_Go_BP.csv	GO:0050912	GO:0050912	detection of chemical stimulus involved in sensory perception of taste	46	-0.612357	-1.27378	0.0331992	0.245295	0.215178	4395	tags=54%, list=23%, signal=42%	563/50839/259296/259293/346562/285093/259290/259285/132112/259292/50832/50837/54429/1469/50834/5726/50836/50835/2780/50831/5304/1472/338557/50838/765
626	group_GSEA_Go_BP.csv	GO:0086003	GO:0086003	cardiac muscle cell contraction	63	-0.613077	-1.29093	0.013986	0.15837	0.138926	3670	tags=48%, list=20%, signal=38%	287/3759/3784/29119/859/2257/6331/388591/8913/3762/3728/3764/776/2626/1824/6330/6323/5318/6262/3760/55800/6327/3757/477/2697/23704/10008/6781/775/5350
627	group_GSEA_Go_BP.csv	GO:0015844	GO:0015844	monoamine transport	90	-0.613139	-1.30763	0.002	0.0457645	0.0401455	3899	tags=50%, list=21%, signal=40%	6623/1133/222962/186/5023/3690/7349/1141/341359/9066/5020/2693/91683/6861/390084/1268/84258/1137/3356/3745/5865/4887/64805/143425/6857/8973/1813/1812/6581/1394/6570/18/2207/3737/183/150/7432/6531/4842/6850/2865/1392/148281/3351/6387
628	group_GSEA_Go_BP.csv	GO:0071398	GO:0071398	cellular response to fatty acid	55	-0.613181	-1.28222	0.0210843	0.19139	0.167891	3296	tags=33%, list=18%, signal=27%	5468/1646/5031/8644/5030/5166/7292/6422/9971/7350/81285/5732/1906/445/2865/4023/4776/5737
629	group_GSEA_Go_BP.csv	GO:0046461	GO:0046461	neutral lipid catabolic process	43	-0.613188	-1.27132	0.040282	0.26573	0.233104	3991	tags=44%, list=21%, signal=35%	747/646480/440503/2166/646486/6653/2172/150379/2822/2173/13/335/26291/344/285848/337/5294/4023/3990
630	group_GSEA_Go_BP.csv	GO:0046464	GO:0046464	acylglycerol catabolic process	43	-0.613188	-1.27132	0.040282	0.26573	0.233104	3991	tags=44%, list=21%, signal=35%	747/646480/440503/2166/646486/6653/2172/150379/2822/2173/13/335/26291/344/285848/337/5294/4023/3990
631	group_GSEA_Go_BP.csv	GO:0050433	GO:0050433	regulation of catecholamine secretion	62	-0.613507	-1.29004	0.012	0.146842	0.128813	3370	tags=69%, list=18%, signal=57%	9607/23208/65018/151/127833/390155/5021/120796/5071/26281/6623/186/7349/1141/341359/9066/5020/2693/91683/6861/390084/1268/84258/1137/3356/3745/4887/64805/143425/6857/8973/1813/1394/18/3737/183/150/7432/2865/1392/148281/3351/6387
632	group_GSEA_Go_BP.csv	GO:0014009	GO:0014009	glial cell proliferation	45	-0.613537	-1.27373	0.0332326	0.245295	0.215178	3236	tags=29%, list=17%, signal=24%	5324/7124/430/374/3569/90865/163175/54209/5179/3553/5764/6664/6663
633	group_GSEA_Go_BP.csv	GO:0031279	GO:0031279	regulation of cyclase activity	43	-0.613656	-1.27229	0.040282	0.26573	0.233104	3145	tags=44%, list=17%, signal=37%	4846/776/84059/53836/5957/5064/2587/8484/1816/729230/1394/2917/79849/4843/2913/9568/4842/775/10886
634	group_GSEA_Go_BP.csv	GO:0051899	GO:0051899	membrane depolarization	86	-0.613691	-1.3075	0.004	0.0732048	0.0642167	4561	tags=52%, list=24%, signal=40%	287/6546/3759/2537/5027/610/288/54831/6328/859/774/2257/6331/1141/2273/8913/885/776/27092/11280/8911/6326/1137/6335/785/6330/4923/6329/1634/6332/8973/6323/55800/6327/773/3757/477/2697/1906/10369/8912/4653/6336/10021/775
635	group_GSEA_Go_BP.csv	GO:1902476	GO:1902476	chloride transmembrane transport	86	-0.615386	-1.31111	0.002	0.0457645	0.0401455	4702	tags=51%, list=25%, signal=39%	1183/26285/6507/2565/2563/846/2556/2568/54831/2559/6505/57468/57348/2561/65012/5349/2570/53405/2555/7809/55107/55879/441509/266675/1188/57030/8542/115111/9022/9635/8001/57101/1187/54102/6557/5172/1193/2569/2557/84561/2554/200959/2564/115019
636	group_GSEA_Go_BP.csv	GO:0043062	GO:0043062	extracellular structure organization	415	-0.615579	-1.34703	0.000999001	0.0293189	0.0257191	4211	tags=45%, list=22%, signal=36%	1463/22795/3383/10609/4763/64066/2192/118856/63827/2294/6624/1842/1803/8435/84570/4325/55612/84695/3384/55790/7133/1294/1286/602/1288/5340/3680/4811/50509/4239/2247/79875/4322/3690/2620/1071/4324/22798/2266/80781/3910/3911/8510/54507/3672/83716/4547/1298/165/3694/90102/3936/2201/6662/642658/5360/3679/3673/3817/7124/4868/1291/7148/4018/340267/9508/5650/8292/25818/9619/1991/3249/84830/169044/64386/…
637	group_GSEA_Go_BP.csv	GO:0048483	GO:0048483	autonomic nervous system development	45	-0.615583	-1.27797	0.0292044	0.231326	0.202924	4933	tags=51%, list=26%, signal=38%	2335/1959/9464/3142/8829/4763/429/5979/390992/8626/1909/10371/2625/2676/6899/3642/3196/7412/91584/4914/7021/6664/6663
638	group_GSEA_Go_BP.csv	GO:0097553	GO:0097553	calcium ion transmembrane import into cytosol	135	-0.61562	-1.32588	0.000999001	0.0293189	0.0257191	3027	tags=32%, list=16%, signal=27%	6261/1234/5031/126306/57338/728215/3356/7040/844/9001/187/4923/57214/5330/9472/8989/56302/6262/4283/2902/1813/1812/2906/1193/196541/2946/477/6348/9002/6373/4842/84502/3627/55503/3357/6547/10268/2904/775/7070/5350/623/3358
639	group_GSEA_Go_BP.csv	GO:0072132	GO:0072132	mesenchyme morphogenesis	52	-0.615695	-1.28645	0.0230692	0.202702	0.177814	3145	tags=48%, list=17%, signal=40%	4193/2296/2260/4194/58/2303/2294/7481/4846/6662/23462/59/26508/8642/650/72/130497/9241/94/7042/655/653/55273/140628/57057
640	group_GSEA_Go_BP.csv	GO:0002011	GO:0002011	morphogenesis of an epithelial sheet	53	-0.61585	-1.28721	0.0240722	0.207595	0.182106	1502	tags=19%, list=8%, signal=17%	23671/7476/10630/1289/94/655/653/4321/57057/6664
641	group_GSEA_Go_BP.csv	GO:0002027	GO:0002027	regulation of heart rate	95	-0.615901	-1.31587	0.002	0.0457645	0.0401455	4561	tags=46%, list=24%, signal=35%	287/6546/3759/3784/10142/29119/1907/57731/186/859/552/6505/6331/5020/148/8913/3762/3728/776/1824/10874/10371/6330/153/5318/6262/80763/3760/55800/1813/6327/6870/3757/1906/183/5999/1908/23704/10008/6336/10021/775/5350/6863
642	group_GSEA_Go_BP.csv	GO:0035637	GO:0035637	multicellular organismal signaling	198	-0.616092	-1.33547	0.000999001	0.0293189	0.0257191	4477	tags=52%, list=24%, signal=40%	6546/3759/3750/3784/10142/23114/551/778/29119/492/8506/3767/27094/10699/288/57731/1133/6328/6543/552/9424/5023/2257/10345/1143/60598/6331/5349/388591/8913/2898/2693/3762/6261/3728/3673/776/53822/27092/11280/1824/59272/8911/3775/6326/4881/6335/785/27345/58524/844/125111/6330/6329/30820/55799/6332/3777/3736/480/6323/3768/5318/1816/6262/486/3760/55800/6327/1812/27091/4916/54112/3757/4897/1901/146183…
643	group_GSEA_Go_BP.csv	GO:0042310	GO:0042310	vasoconstriction	75	-0.616146	-1.31029	0.003	0.0595489	0.0522375	4977	tags=55%, list=27%, signal=40%	952/553/5021/9732/6546/551/8862/3383/1907/846/552/5023/2266/148/1621/1956/1909/59272/27345/80852/3356/59/1131/1311/3274/1816/5743/3792/1636/477/185/2697/1906/183/150/10242/1908/40/624/3357/3351
644	group_GSEA_Go_BP.csv	GO:0002688	GO:0002688	regulation of leukocyte chemotaxis	110	-0.616168	-1.32264	0.000999001	0.0293189	0.0257191	2093	tags=29%, list=11%, signal=26%	9750/284340/5880/3569/79148/7424/5919/683/9353/729230/8740/6352/10563/5054/6354/9547/2660/6348/3579/1906/1908/3627/6347/7941/2155/2150/26585/6387/2358/100528032/1240/5764
645	group_GSEA_Go_BP.csv	GO:0010107	GO:0010107	potassium ion import	48	-0.616217	-1.28404	0.028169	0.226151	0.198384	5231	tags=62%, list=28%, signal=45%	65267/3770/9992/481/65266/3759/3769/3766/3767/610/57468/3762/3764/496/3763/480/3768/3772/8645/100134444/486/3760/3758/6557/3757/477/84561/3761/482/10021
646	group_GSEA_Go_BP.csv	GO:0019229	GO:0019229	regulation of vasoconstriction	57	-0.616261	-1.29073	0.0170512	0.175146	0.153641	5547	tags=63%, list=30%, signal=45%	6915/2702/143872/151/952/553/5021/9732/551/8862/3383/1907/846/552/5023/2266/148/1621/1956/59272/27345/3356/1131/3274/5743/1636/477/185/2697/1906/183/150/10242/1908/40/624
647	group_GSEA_Go_BP.csv	GO:0002673	GO:0002673	regulation of acute inflammatory response	94	-0.616552	-1.31683	0.002	0.0457645	0.0401455	3633	tags=40%, list=19%, signal=33%	725/2213/84699/1380/53833/5468/720/55061/731/8600/7124/730/717/1268/732/325/5008/3078/3569/4889/3075/145741/5743/1370/2207/716/922/5733/2865/710/3426/2/114548/5294/718/10877/3553/6863
648	group_GSEA_Go_BP.csv	GO:0007204	GO:0007204	positive regulation of cytosolic calcium ion concentration	309	-0.617166	-1.34684	0.000999001	0.0293189	0.0257191	3505	tags=39%, list=19%, signal=32%	10345/1235/10161/2247/2769/6346/9170/79608/887/5020/148/6261/1234/111/5031/776/7052/126306/1909/1268/57338/728215/10874/2833/5745/1233/2829/3356/643/7040/844/4887/5030/9001/5156/187/4923/5731/7224/100133941/1903/6288/57214/5330/2780/9472/8989/2828/2587/56302/6262/729230/4283/2902/1813/773/1043/1812/10563/1394/5026/2906/8477/117/8698/5732/1193/196541/5733/2946/1901/2846/477/185/6348/2697/3579/1906…
649	group_GSEA_Go_BP.csv	GO:0033555	GO:0033555	multicellular organismal response to stress	73	-0.617183	-1.31129	0.003	0.0595489	0.0522375	3697	tags=41%, list=20%, signal=33%	5979/774/7349/2898/885/1621/6335/2701/4761/4887/5582/55515/153/644139/8989/57121/1812/1394/117/2697/56923/5179/4842/1392/7101/1620/4914/3620/3358/6863
650	group_GSEA_Go_BP.csv	GO:0035272	GO:0035272	exocrine system development	48	-0.617258	-1.28621	0.0261569	0.216015	0.189492	3487	tags=56%, list=19%, signal=46%	256297/2296/2260/6469/5154/8829/1990/5080/2255/3911/25837/6662/7124/7052/3082/1956/2252/10512/10371/3481/7040/29842/7042/655/2263/7494/6663
651	group_GSEA_Go_BP.csv	GO:0007612	GO:0007612	learning	144	-0.617464	-1.33259	0.000999001	0.0293189	0.0257191	3437	tags=34%, list=18%, signal=28%	266743/57468/7349/8997/590/1141/93986/6900/885/9379/1621/57338/9162/6616/4761/4923/164312/3274/23237/25769/2048/1816/22941/84152/50944/5743/2902/1813/1812/1394/54112/477/183/6529/7143/84502/1392/7097/5153/56924/6547/27023/64220/9378/81832/57502/26047/5764/6863
652	group_GSEA_Go_BP.csv	GO:0098900	GO:0098900	regulation of action potential	49	-0.618316	-1.28935	0.0241449	0.207946	0.182414	4561	tags=47%, list=24%, signal=36%	287/3759/10142/29119/288/859/2257/6331/1141/388591/148/3728/1824/1268/3745/4923/5318/6262/10008/10021/775/948/6863
653	group_GSEA_Go_BP.csv	GO:0098659	GO:0098659	inorganic cation import across plasma membrane	82	-0.618323	-1.31575	0.003003	0.0595489	0.0522375	4477	tags=48%, list=24%, signal=36%	6546/3759/3769/3766/3767/84679/610/7779/285335/55630/799/57468/3762/3764/496/728215/1261/6550/3763/480/3768/3772/56302/284525/8645/100134444/486/3760/3758/6557/3757/477/84561/55503/3761/482/6547/10268/10021
654	group_GSEA_Go_BP.csv	GO:0099587	GO:0099587	inorganic ion import across plasma membrane	82	-0.618323	-1.31575	0.003003	0.0595489	0.0522375	4477	tags=48%, list=24%, signal=36%	6546/3759/3769/3766/3767/84679/610/7779/285335/55630/799/57468/3762/3764/496/728215/1261/6550/3763/480/3768/3772/56302/284525/8645/100134444/486/3760/3758/6557/3757/477/84561/55503/3761/482/6547/10268/10021
655	group_GSEA_Go_BP.csv	GO:0019935	GO:0019935	cyclic-nucleotide-mediated signaling	210	-0.618721	-1.34224	0.000999001	0.0293189	0.0257191	4636	tags=50%, list=25%, signal=38%	3375/112609/22859/120796/122042/5140/1902/5734/6014/55366/10846/2492/196/2696/30817/5997/5141/576/27445/1672/3747/23266/799/7349/222487/148/575/139378/6662/10267/111/10900/23284/390084/2774/6754/5745/4988/4881/8549/266977/10266/4887/187/5731/2015/59350/10149/2691/170589/153/9472/10203/122876/51555/2587/1816/155/5139/2695/797/4283/1813/1812/1394/146/8477/81285/4158/117/8698/79849/5732/5733/9699/39…
656	group_GSEA_Go_BP.csv	GO:0009268	GO:0009268	response to pH	40	-0.618884	-1.27931	0.0443548	0.278064	0.243923	2587	tags=32%, list=14%, signal=28%	2822/6750/3645/8111/89872/2828/2695/10991/8477/2697/1520/40/5105
657	group_GSEA_Go_BP.csv	GO:0072678	GO:0072678	T cell migration	63	-0.619942	-1.30538	0.00999001	0.132244	0.116007	3485	tags=37%, list=19%, signal=30%	1235/1880/4345/6364/326/2833/6693/7535/9750/729230/8740/6352/10563/11035/1901/6348/6373/3627/6347/5294/6387/347/10344
658	group_GSEA_Go_BP.csv	GO:0001580	GO:0001580	detection of chemical stimulus involved in sensory perception of bitter taste	40	-0.621468	-1.28466	0.0393145	0.26393	0.231524	4395	tags=60%, list=23%, signal=46%	563/50839/259296/259293/346562/285093/259290/259285/132112/259292/50832/50837/54429/1469/50834/5726/50836/50835/2780/50831/5304/1472/50838/765
659	group_GSEA_Go_BP.csv	GO:0048247	GO:0048247	lymphocyte chemotaxis	62	-0.621487	-1.30682	0.01	0.132244	0.116007	3804	tags=42%, list=20%, signal=34%	9420/6359/6346/1880/6357/22914/6364/2833/6360/6288/6355/6369/729230/8740/6352/10563/6354/9547/6356/6348/6373/3627/6347/5294/100528032/10344
660	group_GSEA_Go_BP.csv	GO:1903793	GO:1903793	positive regulation of anion transport	50	-0.621511	-1.29601	0.0211055	0.19139	0.167891	4307	tags=44%, list=23%, signal=34%	551/5244/5027/8564/552/1051/51761/5020/885/8600/6754/59272/4923/8529/335/7200/18/10991/1906/183/6529/3553
661	group_GSEA_Go_BP.csv	GO:0003170	GO:0003170	heart valve development	59	-0.62187	-1.30622	0.013013	0.15157	0.13296	3978	tags=39%, list=21%, signal=31%	161882/6586/7133/1942/4846/6662/642658/2626/23462/54567/2625/7040/26508/8642/650/9353/7042/639/6910/64220/140628/57057/2006
662	group_GSEA_Go_BP.csv	GO:0007190	GO:0007190	activation of adenylate cyclase activity	36	-0.621949	-1.27655	0.0433905	0.27652	0.242569	4554	tags=47%, list=24%, signal=36%	122042/55366/2492/2696/111/49/1909/8549/59350/153/1816/155/1812/1394/3973/114/2740
663	group_GSEA_Go_BP.csv	GO:0002369	GO:0002369	T cell cytokine production	40	-0.622003	-1.28576	0.0372984	0.258859	0.227076	3678	tags=38%, list=20%, signal=30%	7133/8807/1178/8809/30009/2625/3606/7292/3569/3554/3456/729230/91543/114548/3553
664	group_GSEA_Go_BP.csv	GO:0006949	GO:0006949	syncytium formation	56	-0.622043	-1.30058	0.0150602	0.165637	0.1453	3100	tags=34%, list=17%, signal=28%	4656/575/963/4868/8536/92304/9750/128506/8521/405754/389827/4283/8740/54209/8912/4842/3627/7471/81501
665	group_GSEA_Go_BP.csv	GO:0006956	GO:0006956	complement activation	70	-0.622096	-1.31492	0.00500501	0.0837585	0.0734746	3723	tags=43%, list=20%, signal=34%	100423062/725/51279/1380/1401/3848/720/78989/55061/731/730/717/5648/732/325/1675/3078/3075/1370/716/922/2219/51435/710/3426/2/718/10877/3553/10584
666	group_GSEA_Go_BP.csv	GO:0061383	GO:0061383	trabecula morphogenesis	47	-0.622385	-1.29461	0.0231388	0.202702	0.177814	4101	tags=38%, list=22%, signal=30%	30061/9510/859/2201/23462/5950/54567/27302/6422/1901/9241/7010/7042/655/653/1277/26585/1482
667	group_GSEA_Go_BP.csv	GO:1903524	GO:1903524	positive regulation of blood circulation	69	-0.622928	-1.3163	0.005	0.0837585	0.0734746	4377	tags=51%, list=23%, signal=39%	3784/551/8862/3383/1907/5997/846/552/6505/7349/2266/388591/148/1621/1956/59272/100506013/10874/3356/1131/153/3274/6262/5743/55800/6870/81285/5732/2697/1906/7042/5999/1908/2150/1482
668	group_GSEA_Go_BP.csv	GO:0006958	GO:0006958	complement activation, classical pathway	34	-0.623265	-1.27635	0.0464646	0.285676	0.250601	4200	tags=50%, list=22%, signal=39%	1191/100423062/725/51279/1380/1401/720/55061/731/730/717/732/325/716/710/3426/718
669	group_GSEA_Go_BP.csv	GO:0048806	GO:0048806	genitalia development	47	-0.623355	-1.29663	0.0221328	0.197136	0.172932	5032	tags=49%, list=27%, signal=36%	497189/6469/2099/6716/55366/10388/558/2255/8626/5950/367/7484/654/5156/7490/80000/3293/3973/653/4920/3975/4036/64220
670	group_GSEA_Go_BP.csv	GO:0000768	GO:0000768	syncytium formation by plasma membrane fusion	55	-0.623451	-1.30369	0.0150602	0.165637	0.1453	3100	tags=35%, list=17%, signal=29%	4656/575/963/4868/8536/92304/9750/128506/8521/405754/389827/4283/8740/54209/8912/4842/3627/7471/81501
671	group_GSEA_Go_BP.csv	GO:0140253	GO:0140253	cell-cell fusion	55	-0.623451	-1.30369	0.0150602	0.165637	0.1453	3100	tags=35%, list=17%, signal=29%	4656/575/963/4868/8536/92304/9750/128506/8521/405754/389827/4283/8740/54209/8912/4842/3627/7471/81501
672	group_GSEA_Go_BP.csv	GO:0098739	GO:0098739	import across plasma membrane	109	-0.623494	-1.33778	0.000999001	0.0293189	0.0257191	4550	tags=48%, list=24%, signal=36%	6507/6546/3759/3769/3766/113235/5997/3767/84679/610/7779/285335/55630/799/6505/57468/3762/6506/2350/6518/3764/496/728215/1261/4923/84889/6550/3763/480/3768/3772/56302/284525/8645/100134444/486/3760/3758/6557/3757/477/183/84561/5999/6511/55503/3761/482/4036/6547/10268/10021
673	group_GSEA_Go_BP.csv	GO:0090184	GO:0090184	positive regulation of kidney development	40	-0.624019	-1.28993	0.0332661	0.245295	0.215178	4853	tags=60%, list=26%, signal=45%	652/6469/5154/51804/7422/55366/7482/5979/186/5076/9370/6662/10409/2625/7040/100133941/79727/7490/8710/9241/5155/183/5159/3975
674	group_GSEA_Go_BP.csv	GO:0050795	GO:0050795	regulation of behavior	71	-0.624184	-1.32043	0.003003	0.0595489	0.0522375	3400	tags=38%, list=18%, signal=31%	5730/7349/1141/2693/885/1268/10874/4887/2691/1437/7200/1813/1394/6870/6348/2697/3737/84251/5179/3062/1392/85445/3357/3351/64220/4160/9378
675	group_GSEA_Go_BP.csv	GO:0060193	GO:0060193	positive regulation of lipase activity	70	-0.624472	-1.31994	0.004004	0.0732048	0.0642167	3786	tags=49%, list=20%, signal=39%	440503/2261/552/7294/2247/2769/10316/9170/148/5031/1956/1909/627/2321/3356/5156/64805/5330/6352/6401/4916/117/8698/5322/344/185/56923/183/2263/5159/337/3357/395/5406
676	group_GSEA_Go_BP.csv	GO:0086091	GO:0086091	regulation of heart rate by cardiac conduction	37	-0.624527	-1.28352	0.034413	0.249791	0.219122	5466	tags=68%, list=29%, signal=48%	2702/3753/6324/9992/287/3759/3784/10142/29119/6331/8913/3762/3728/776/1824/6330/5318/3760/55800/6327/3757/23704/10008/10021/775
677	group_GSEA_Go_BP.csv	GO:0050886	GO:0050886	endocrine process	81	-0.625169	-1.33156	0.002	0.0457645	0.0401455	2642	tags=37%, list=14%, signal=32%	59272/2625/654/1215/5125/2028/3624/5443/2587/1816/668/1394/1511/56670/81285/1636/3625/1359/185/1906/183/1908/1392/114899/51083/2150/5972/3814/3553/6863
678	group_GSEA_Go_BP.csv	GO:0044070	GO:0044070	regulation of anion transport	93	-0.626389	-1.3371	0.002	0.0457645	0.0401455	4307	tags=40%, list=23%, signal=31%	551/5244/5027/5997/8564/285966/6424/186/552/1051/51761/5020/885/8600/6754/59272/4923/8529/8074/335/4889/7200/130497/18/10991/2917/477/1906/183/6529/5999/6850/2564/6781/9900/3553/6098
679	group_GSEA_Go_BP.csv	GO:1990266	GO:1990266	neutrophil migration	113	-0.62683	-1.34666	0.000999001	0.0293189	0.0257191	3587	tags=45%, list=19%, signal=37%	57126/3680/6359/27179/6346/3557/3672/5657/27178/120425/3071/6357/6374/6280/56300/6364/3576/84639/6360/9750/6288/5880/6355/3554/6369/5197/683/5175/9353/5473/4283/6352/10563/6354/2207/6356/6348/3579/1906/7042/1908/6373/6850/3627/5196/6347/5294/26525/27177/10344/3553
680	group_GSEA_Go_BP.csv	GO:0042092	GO:0042092	type 2 immune response	35	-0.62705	-1.2854	0.0374115	0.258859	0.227076	3645	tags=43%, list=19%, signal=35%	602/10538/30009/2625/384/3606/7292/3569/3456/90865/729230/91543/64127/114548/3620
681	group_GSEA_Go_BP.csv	GO:0051279	GO:0051279	regulation of release of sequestered calcium ion into cytosol	78	-0.627114	-1.33413	0.001	0.0293189	0.0257191	2930	tags=33%, list=16%, signal=28%	5031/126306/57338/7040/844/9001/187/4923/57214/9472/6262/4283/1812/1193/196541/2946/477/9002/6373/4842/84502/3627/775/7070/5350/623
682	group_GSEA_Go_BP.csv	GO:0050918	GO:0050918	positive chemotaxis	67	-0.627228	-1.32365	0.003003	0.0595489	0.0522375	4455	tags=49%, list=24%, signal=38%	9048/7422/8829/846/566/6359/2247/2255/2152/3673/3082/7857/2252/3576/1233/6360/6288/7424/6289/6352/4916/1901/6348/5155/285/3627/284/2155/2150/6387/2358/1012/10584
683	group_GSEA_Go_BP.csv	GO:1903115	GO:1903115	regulation of actin filament-based movement	42	-0.627316	-1.29954	0.0261833	0.216015	0.189492	4561	tags=48%, list=24%, signal=36%	287/3759/10142/29119/859/6331/388591/3728/2626/1824/4607/5318/6262/10630/477/10008/6781/10021/775/5350
684	group_GSEA_Go_BP.csv	GO:1990868	GO:1990868	response to chemokine	95	-0.627552	-1.34076	0.001	0.0293189	0.0257191	3552	tags=45%, list=19%, signal=37%	6359/1235/6346/6357/6374/1234/6364/3576/2833/1233/2829/7066/643/6360/9750/6355/6369/5197/9353/729230/5473/4283/6352/10563/6354/6356/7032/4015/54209/6348/3579/1906/6373/3627/57007/9034/5196/1232/6347/6387/10344/1240/2532
685	group_GSEA_Go_BP.csv	GO:1990869	GO:1990869	cellular response to chemokine	95	-0.627552	-1.34076	0.001	0.0293189	0.0257191	3552	tags=45%, list=19%, signal=37%	6359/1235/6346/6357/6374/1234/6364/3576/2833/1233/2829/7066/643/6360/9750/6355/6369/5197/9353/729230/5473/4283/6352/10563/6354/6356/7032/4015/54209/6348/3579/1906/6373/3627/57007/9034/5196/1232/6347/6387/10344/1240/2532
686	group_GSEA_Go_BP.csv	GO:0030198	GO:0030198	extracellular matrix organization	362	-0.627609	-1.372	0.000999001	0.0293189	0.0257191	4211	tags=49%, list=22%, signal=39%	5654/146206/2303/56547/1280/1308/1463/22795/3383/10609/4763/64066/2192/118856/63827/2294/6624/1842/1803/84570/4325/55612/84695/3384/55790/7133/1294/1286/602/1288/5340/3680/4811/50509/4239/2247/79875/4322/3690/2620/4324/22798/2266/80781/3910/3911/8510/54507/3672/83716/1298/165/3694/90102/3936/2201/6662/642658/3679/3673/3817/7124/4868/1291/7148/340267/9508/5650/8292/25818/1991/3249/84830/169044/643…
687	group_GSEA_Go_BP.csv	GO:0032350	GO:0032350	regulation of hormone metabolic process	38	-0.627713	-1.29322	0.0343088	0.249592	0.218947	3477	tags=39%, list=19%, signal=32%	405753/55809/7124/2672/8644/2625/3249/654/90527/650/653/2865/51083/27122/3553
688	group_GSEA_Go_BP.csv	GO:0002526	GO:0002526	acute inflammatory response	155	-0.62775	-1.35583	0.000999001	0.0293189	0.0257191	4305	tags=47%, list=23%, signal=37%	3572/388125/3929/54658/1191/3383/50616/2157/9180/3250/725/2213/1051/84699/1380/1401/53833/5468/720/2152/5005/55061/9332/130120/731/8600/7124/730/717/5068/1268/4988/732/1991/2625/325/26471/6288/5008/7292/3078/3569/9536/4889/6289/3075/145741/259249/5743/5004/1370/2207/716/922/5733/8876/3579/7412/445/2865/710/3426/54210/2/114548/5294/718/3240/3552/10877/12/3553/6863
689	group_GSEA_Go_BP.csv	GO:0010862	GO:0010862	positive regulation of pathway-restricted SMAD protein phosphorylation	48	-0.627911	-1.30841	0.0191147	0.180734	0.158544	3638	tags=38%, list=19%, signal=30%	151449/83729/10220/651/7040/654/27302/3624/2662/9573/650/2660/3625/94/7042/655/653/392255
690	group_GSEA_Go_BP.csv	GO:0019933	GO:0019933	cAMP-mediated signaling	182	-0.628139	-1.35847	0.000999001	0.0293189	0.0257191	4636	tags=52%, list=25%, signal=40%	3375/112609/22859/120796/122042/5140/1902/5734/6014/55366/10846/2492/196/2696/30817/5997/5141/576/27445/1672/23266/799/7349/222487/148/575/139378/6662/10267/111/23284/390084/2774/6754/5745/4988/8549/266977/10266/4887/187/5731/2015/59350/10149/2691/170589/153/9472/10203/122876/51555/2587/1816/155/5139/2695/797/4283/1813/1812/1394/146/8477/81285/4158/117/8698/5732/5733/9699/3973/150/7432/3361/2641/…
691	group_GSEA_Go_BP.csv	GO:0071621	GO:0071621	granulocyte chemotaxis	118	-0.628247	-1.34995	0.000999001	0.0293189	0.0257191	3554	tags=44%, list=19%, signal=36%	3680/6359/27179/6346/3557/3672/27178/120425/3071/6357/6374/6280/56300/6364/7857/3576/84639/6360/9750/6288/284340/5880/6355/6369/5197/5919/683/9353/5473/4283/6352/10563/6354/2207/2660/6356/6348/3579/1906/7042/1908/6373/6850/3627/5196/6347/5294/26525/27177/10344/3553/1240
692	group_GSEA_Go_BP.csv	GO:1900274	GO:1900274	regulation of phospholipase C activity	45	-0.628257	-1.30428	0.020141	0.185485	0.162711	3639	tags=67%, list=19%, signal=54%	4915/4909/2260/553/2099/1902/552/7294/2247/2769/10316/9170/148/5031/1956/1909/627/2321/3356/5156/64805/5330/6401/4916/117/8698/183/5159/3357/395
693	group_GSEA_Go_BP.csv	GO:0086004	GO:0086004	regulation of cardiac muscle cell contraction	38	-0.62829	-1.29441	0.0343088	0.249592	0.218947	4561	tags=47%, list=24%, signal=36%	287/3759/10142/29119/859/6331/388591/3728/2626/1824/5318/6262/477/10008/6781/10021/775/5350
694	group_GSEA_Go_BP.csv	GO:0007520	GO:0007520	myoblast fusion	40	-0.628452	-1.29909	0.0302419	0.235208	0.206329	3100	tags=35%, list=17%, signal=29%	859/4656/575/963/4868/92304/9750/389827/4283/8740/8912/4842/3627/7471
695	group_GSEA_Go_BP.csv	GO:0051926	GO:0051926	negative regulation of calcium ion transport	59	-0.628516	-1.32018	0.00700701	0.103924	0.0911642	4207	tags=41%, list=22%, signal=32%	100507027/3383/6406/7779/945/859/10345/4846/7040/4923/5743/1813/1394/1193/2946/477/6236/150/4842/57119/6781/5350/6588/28954
696	group_GSEA_Go_BP.csv	GO:0050716	GO:0050716	positive regulation of interleukin-1 secretion	36	-0.628746	-1.2905	0.0302725	0.235208	0.206329	3191	tags=47%, list=17%, signal=39%	373509/5027/353514/5005/834/338322/51311/9447/6288/22861/5004/6348/64127/114548/4023/116337/55655
697	group_GSEA_Go_BP.csv	GO:0003044	GO:0003044	regulation of systemic arterial blood pressure mediated by a chemical signal	47	-0.628751	-1.30785	0.0171026	0.175146	0.153641	4098	tags=55%, list=22%, signal=43%	1907/10699/91608/186/552/4846/148/6518/59272/1215/5125/2028/153/1816/155/1511/56670/81285/1636/1359/185/1906/183/1908/2150/5972
698	group_GSEA_Go_BP.csv	GO:0050701	GO:0050701	interleukin-1 secretion	59	-0.628766	-1.3207	0.00700701	0.103924	0.0911642	3467	tags=41%, list=18%, signal=33%	115362/59082/5005/834/440068/7850/338322/384/51311/9447/6288/22861/335/152138/114769/5004/6348/64127/114548/2150/4023/116337/55655/948
699	group_GSEA_Go_BP.csv	GO:0002690	GO:0002690	positive regulation of leukocyte chemotaxis	86	-0.629072	-1.34027	0.002	0.0457645	0.0401455	2093	tags=30%, list=11%, signal=27%	9750/284340/5880/3569/7424/5919/729230/8740/6352/10563/5054/6354/9547/2660/6348/3579/1906/1908/3627/7941/2155/2150/6387/2358/1240/5764
700	group_GSEA_Go_BP.csv	GO:0098868	GO:0098868	bone growth	46	-0.629931	-1.31034	0.0160966	0.169929	0.149065	845	tags=39%, list=5%, signal=37%	2261/1294/3953/4322/1291/9350/1311/81578/2263/1690/51435/7373/5915/1292/6781/5212/340706/344901
701	group_GSEA_Go_BP.csv	GO:0045668	GO:0045668	negative regulation of osteoblast differentiation	43	-0.630062	-1.3063	0.0171198	0.175146	0.153641	3714	tags=40%, list=20%, signal=32%	221044/5727/202151/7124/6096/374/3199/8074/117581/6422/2662/3488/8646/9241/63923/26585/344901
702	group_GSEA_Go_BP.csv	GO:0032689	GO:0032689	negative regulation of interferon-gamma production	33	-0.630125	-1.2842	0.0394338	0.264422	0.231956	5374	tags=61%, list=29%, signal=43%	3965/3586/84868/114771/3623/57115/64115/558/53833/29126/10225/2625/3624/7292/9971/90865/284194/9173/80380/26525
703	group_GSEA_Go_BP.csv	GO:0001508	GO:0001508	action potential	126	-0.630304	-1.35501	0.000999001	0.0293189	0.0257191	4561	tags=52%, list=24%, signal=40%	287/6546/3759/3784/10142/29119/8506/27094/610/288/6328/859/5023/2257/1143/6331/1141/388591/148/8913/2898/3762/3728/3764/776/11280/1824/1268/8911/6326/1137/6335/27345/3745/6330/4923/6329/6332/3736/9472/6323/5318/6262/3760/55800/6327/1812/4916/54112/3757/4897/477/2697/3737/8912/10242/3751/23704/10008/1134/6336/10021/775/948/57369/6863
704	group_GSEA_Go_BP.csv	GO:0002718	GO:0002718	regulation of cytokine production involved in immune response	83	-0.630373	-1.34104	0.002002	0.0457645	0.0401455	3008	tags=39%, list=16%, signal=33%	3718/23586/7133/9865/1178/7124/8809/3135/30009/10225/684/2625/3606/7040/7292/3569/3554/3456/335/10417/729230/91543/2207/64127/7042/2865/11213/284/114548/2150/948/3553
705	group_GSEA_Go_BP.csv	GO:1905207	GO:1905207	regulation of cardiocyte differentiation	49	-0.630822	-1.31543	0.0130785	0.151825	0.133184	2851	tags=39%, list=15%, signal=33%	5997/8324/859/2626/1956/10512/93649/7040/28514/9472/64321/650/1906/7042/655/5999/6910/26585/1482
706	group_GSEA_Go_BP.csv	GO:0050806	GO:0050806	positive regulation of synaptic transmission	166	-0.631206	-1.36578	0.000999001	0.0293189	0.0257191	3218	tags=37%, list=17%, signal=31%	1141/5020/148/2898/91683/776/7124/27092/1956/1268/8938/10874/6616/9746/5865/9001/4923/143425/112755/1395/6857/23237/25769/2048/22941/3908/50944/2695/7476/5743/729230/2902/1813/1812/27091/1394/18/2906/64084/59284/10590/9699/10369/5999/7143/4920/1392/6347/7101/59283/23025/114/4776/4914/6547/2904/3814/9378/81832/22999/5764/6863
707	group_GSEA_Go_BP.csv	GO:0048566	GO:0048566	embryonic digestive tract development	34	-0.631668	-1.29356	0.040404	0.266266	0.233574	4020	tags=47%, list=21%, signal=37%	2294/91461/348093/2255/7124/2736/3576/5156/5125/5919/7042/2263/2254/5915/64220/6664
708	group_GSEA_Go_BP.csv	GO:0051154	GO:0051154	negative regulation of striated muscle cell differentiation	35	-0.631832	-1.2952	0.0343782	0.249791	0.219122	4054	tags=40%, list=22%, signal=31%	5997/8324/493829/859/627/93649/168620/28514/650/5999/3627/338773/1482/7494
709	group_GSEA_Go_BP.csv	GO:0019098	GO:0019098	reproductive behavior	31	-0.631849	-1.28496	0.0474747	0.290851	0.255141	4307	tags=52%, list=23%, signal=40%	551/5270/4861/552/4543/8997/5020/1621/63951/4808/7068/1816/84152/2902/1812/1620
710	group_GSEA_Go_BP.csv	GO:0055078	GO:0055078	sodium ion homeostasis	52	-0.631977	-1.32047	0.0110331	0.140748	0.123467	4753	tags=58%, list=25%, signal=43%	481/1579/6546/551/6338/10699/7380/186/552/5020/496/730/66002/6340/4881/8529/6332/480/80763/1813/6557/477/185/1906/183/64699/482/4879/7021/6863
711	group_GSEA_Go_BP.csv	GO:0050982	GO:0050982	detection of mechanical stimulus	43	-0.63211	-1.31055	0.0171198	0.175146	0.153641	3106	tags=37%, list=17%, signal=31%	8048/3728/3673/84059/3249/3356/117531/3736/6323/8989/1301/63982/40/6387/4914/55584
712	group_GSEA_Go_BP.csv	GO:0043114	GO:0043114	regulation of vascular permeability	36	-0.632159	-1.2975	0.0292634	0.231464	0.203045	2394	tags=44%, list=13%, signal=39%	388125/7422/566/7349/4881/7040/10266/654/145741/5139/9353/3579/7010/284/624/4879
713	group_GSEA_Go_BP.csv	GO:0071715	GO:0071715	icosanoid transport	49	-0.632197	-1.3183	0.0120724	0.146842	0.128813	3151	tags=43%, list=17%, signal=36%	5020/8600/6754/84647/4923/8529/5320/1813/255189/5322/1636/26279/6578/4843/391013/1906/56923/50487/6850/624/3553
714	group_GSEA_Go_BP.csv	GO:1901571	GO:1901571	fatty acid derivative transport	49	-0.632197	-1.3183	0.0120724	0.146842	0.128813	3151	tags=43%, list=17%, signal=36%	5020/8600/6754/84647/4923/8529/5320/1813/255189/5322/1636/26279/6578/4843/391013/1906/56923/50487/6850/624/3553
715	group_GSEA_Go_BP.csv	GO:0051932	GO:0051932	synaptic transmission, GABAergic	45	-0.633069	-1.31427	0.0140987	0.158476	0.139019	4148	tags=51%, list=22%, signal=40%	2565/4763/2556/2559/266743/2561/148/5881/1268/8938/2555/5334/9746/9001/4889/1813/2557/6529/2554/85445/3351/2564/6863
716	group_GSEA_Go_BP.csv	GO:0007188	GO:0007188	adenylate cyclase-modulating G protein-coupled receptor signaling pathway	216	-0.63356	-1.3754	0.000999001	0.0293189	0.0257191	3411	tags=42%, list=18%, signal=35%	2769/4543/6752/768239/222487/148/575/139378/10267/111/776/23284/1909/390084/2774/6754/1268/2918/5745/4988/2916/8549/266977/9630/10266/4887/1131/64805/5731/2015/1903/5064/59350/10149/2691/1395/2780/170589/153/10203/122876/2587/1816/155/797/4283/1813/3355/1812/1394/146/8477/4158/8698/2917/5732/5733/1901/1906/1129/3973/150/2913/7432/3361/2641/6373/4842/2865/3627/79924/5196/5739/1232/2849/2357/3351/2…
717	group_GSEA_Go_BP.csv	GO:0051781	GO:0051781	positive regulation of cell division	86	-0.63369	-1.35011	0.001	0.0293189	0.0257191	2638	tags=33%, list=14%, signal=28%	2252/3481/54627/643/7040/2251/201161/7039/5008/7424/6755/51289/5473/1813/2246/81606/84432/5155/7042/2263/2250/2254/2069/3357/50838/3552/3553/5764
718	group_GSEA_Go_BP.csv	GO:0002720	GO:0002720	positive regulation of cytokine production involved in immune response	53	-0.633911	-1.32496	0.00601805	0.0941182	0.0825623	2826	tags=30%, list=15%, signal=26%	8809/3135/2625/3606/7292/3569/3554/10417/91543/2207/64127/2865/114548/2150/948/3553
719	group_GSEA_Go_BP.csv	GO:0010659	GO:0010659	cardiac muscle cell apoptotic process	37	-0.634161	-1.30333	0.0242915	0.208933	0.18328	3076	tags=30%, list=16%, signal=25%	2792/2626/93649/26471/5458/815/3579/183/4058/6423/1482
720	group_GSEA_Go_BP.csv	GO:0048048	GO:0048048	embryonic eye morphogenesis	34	-0.634452	-1.29926	0.0363636	0.255408	0.224049	3562	tags=35%, list=19%, signal=29%	5076/5080/6935/2201/6496/2202/668/2200/655/5915/64220/6664
721	group_GSEA_Go_BP.csv	GO:0010524	GO:0010524	positive regulation of calcium ion transport into cytosol	54	-0.634679	-1.32783	0.00601202	0.0941182	0.0825623	2245	tags=35%, list=12%, signal=31%	844/9001/187/4923/57214/9472/4283/2902/1812/5026/117/2946/9002/920/6373/3627/10268/7070/623
722	group_GSEA_Go_BP.csv	GO:0071772	GO:0071772	response to BMP	163	-0.635077	-1.37349	0.000999001	0.0293189	0.0257191	3081	tags=31%, list=16%, signal=26%	10468/6662/642658/6653/2626/23090/2625/654/9350/27302/1311/6422/390598/91851/9573/402117/269/860/6262/26508/6692/650/170261/25928/8646/94031/64388/375567/147409/2200/9241/168667/94/655/653/5046/4920/26585/81792/652991/4036/50964/55273/6423/7021/392255/23213/140628/1482/7471/6664
723	group_GSEA_Go_BP.csv	GO:0071773	GO:0071773	cellular response to BMP stimulus	163	-0.635077	-1.37349	0.000999001	0.0293189	0.0257191	3081	tags=31%, list=16%, signal=26%	10468/6662/642658/6653/2626/23090/2625/654/9350/27302/1311/6422/390598/91851/9573/402117/269/860/6262/26508/6692/650/170261/25928/8646/94031/64388/375567/147409/2200/9241/168667/94/655/653/5046/4920/26585/81792/652991/4036/50964/55273/6423/7021/392255/23213/140628/1482/7471/6664
724	group_GSEA_Go_BP.csv	GO:0050805	GO:0050805	negative regulation of synaptic transmission	70	-0.635517	-1.34328	0.001001	0.0293189	0.0257191	3256	tags=37%, list=17%, signal=31%	590/9370/392862/2898/9162/3356/3745/4887/43/4889/23237/25769/2890/1816/22941/5743/1813/1812/6529/7143/57537/3351/2899/114/3553/57502
725	group_GSEA_Go_BP.csv	GO:0015837	GO:0015837	amine transport	102	-0.635663	-1.36083	0.000999001	0.0293189	0.0257191	4314	tags=56%, list=23%, signal=43%	5071/551/26281/5027/5997/8564/6623/186/552/7349/1141/341359/9066/5020/2693/91683/885/6861/85413/390084/1268/59272/84258/1137/3356/3745/5865/4887/4923/64805/51458/143425/6857/4889/8973/7200/1813/1812/1394/130497/6570/18/10991/2917/477/3737/183/150/7432/6529/5999/2865/1392/148281/3351/6387/9900
726	group_GSEA_Go_BP.csv	GO:0001990	GO:0001990	regulation of systemic arterial blood pressure by hormone	39	-0.63567	-1.31272	0.0231855	0.202702	0.177814	4098	tags=56%, list=22%, signal=44%	1907/10699/91608/186/552/4846/59272/1215/5125/2028/1816/1511/56670/81285/1636/1359/185/1906/183/1908/2150/5972
727	group_GSEA_Go_BP.csv	GO:0070528	GO:0070528	protein kinase C signaling	29	-0.635712	-1.28791	0.047619	0.290851	0.255141	4307	tags=48%, list=23%, signal=37%	551/7422/566/7481/148/8048/84059/958/260429/4142/5155/3357/387758/23544
728	group_GSEA_Go_BP.csv	GO:0032228	GO:0032228	regulation of synaptic transmission, GABAergic	32	-0.635751	-1.29502	0.0353535	0.252953	0.221895	3437	tags=56%, list=18%, signal=46%	1269/23349/57555/594857/5021/4763/266743/148/1268/8938/5334/9001/4889/1813/6529/85445/3351/6863
729	group_GSEA_Go_BP.csv	GO:0030509	GO:0030509	BMP signaling pathway	150	-0.636	-1.37229	0.000999001	0.0293189	0.0257191	2193	tags=27%, list=12%, signal=24%	654/9350/27302/1311/6422/390598/91851/9573/402117/269/860/6262/650/170261/25928/8646/94031/64388/375567/147409/2200/9241/168667/94/655/653/5046/4920/26585/652991/4036/50964/55273/6423/7021/392255/23213/1482/7471/6664
730	group_GSEA_Go_BP.csv	GO:0051180	GO:0051180	vitamin transport	38	-0.636491	-1.31131	0.0232089	0.202702	0.177814	3051	tags=37%, list=16%, signal=31%	6947/83546/2350/56918/173/81693/2352/335/80704/144195/6514/4036/148641/64220
731	group_GSEA_Go_BP.csv	GO:0035774	GO:0035774	positive regulation of insulin secretion involved in cellular response to glucose stimulus	33	-0.636663	-1.29752	0.0374115	0.258859	0.227076	3233	tags=33%, list=17%, signal=28%	222546/57393/2822/8938/55107/9971/2850/7447/2641/1392/114
732	group_GSEA_Go_BP.csv	GO:0007215	GO:0007215	glutamate receptor signaling pathway	100	-0.63667	-1.36195	0.000999001	0.0293189	0.0257191	2792	tags=36%, list=15%, signal=31%	27092/2918/4988/2916/54550/3745/23732/149111/23237/2893/2890/2048/22941/50944/4747/729230/2902/27091/2892/2906/2917/59284/10369/2913/1392/6347/306/146395/59283/23025/440829/2891/2899/6751/2904/81832
733	group_GSEA_Go_BP.csv	GO:1990573	GO:1990573	potassium ion import across plasma membrane	43	-0.637403	-1.32152	0.0140987	0.158476	0.139019	4427	tags=58%, list=24%, signal=45%	3759/3769/3766/3767/610/57468/3762/3764/496/3763/480/3768/3772/8645/100134444/486/3760/3758/6557/3757/477/84561/3761/482/10021
734	group_GSEA_Go_BP.csv	GO:0032309	GO:0032309	icosanoid secretion	45	-0.637791	-1.32408	0.0110775	0.140748	0.123467	3151	tags=44%, list=17%, signal=37%	5020/8600/6754/84647/4923/8529/5320/1813/255189/5322/1636/26279/4843/391013/1906/56923/50487/6850/624/3553
735	group_GSEA_Go_BP.csv	GO:0001504	GO:0001504	neurotransmitter uptake	46	-0.638184	-1.3275	0.0120724	0.146842	0.128813	4550	tags=54%, list=24%, signal=41%	6507/5071/3766/5997/3177/9143/6538/6505/3690/6506/6616/5865/4923/1813/1812/6581/6570/6536/477/6529/6531/5999/4842/6511/6512
736	group_GSEA_Go_BP.csv	GO:0003417	GO:0003417	growth plate cartilage development	35	-0.639454	-1.31082	0.0232558	0.202702	0.177814	2185	tags=40%, list=12%, signal=35%	1294/4322/1291/9350/1311/81578/1690/51435/7373/5915/1292/6781/5212/340706
737	group_GSEA_Go_BP.csv	GO:0060292	GO:0060292	long-term synaptic depression	31	-0.639925	-1.30139	0.0353535	0.252953	0.221895	3122	tags=39%, list=17%, signal=32%	2895/392862/9162/3745/23237/25769/2890/1816/22941/1812/57537/114
738	group_GSEA_Go_BP.csv	GO:0008207	GO:0008207	C21-steroid hormone metabolic process	39	-0.640607	-1.32292	0.0191532	0.180734	0.158544	3329	tags=36%, list=18%, signal=30%	1583/1646/10170/8644/1645/1586/654/9256/3283/650/8912/653/3284/27122
739	group_GSEA_Go_BP.csv	GO:0030593	GO:0030593	neutrophil chemotaxis	100	-0.640673	-1.37051	0.000999001	0.0293189	0.0257191	3554	tags=47%, list=19%, signal=38%	3680/6359/27179/6346/3557/3672/27178/120425/3071/6357/6374/6280/56300/6364/3576/84639/6360/9750/6288/5880/6355/6369/5197/683/9353/5473/4283/6352/10563/6354/2207/6356/6348/3579/1906/7042/1908/6373/6850/3627/5196/6347/5294/26525/27177/10344/3553
740	group_GSEA_Go_BP.csv	GO:0010863	GO:0010863	positive regulation of phospholipase C activity	43	-0.640824	-1.32861	0.0130916	0.151825	0.133184	3639	tags=70%, list=19%, signal=56%	4915/4909/2260/553/2099/1902/552/7294/2247/2769/10316/9170/148/5031/1956/1909/627/2321/3356/5156/64805/5330/6401/4916/117/8698/183/5159/3357/395
741	group_GSEA_Go_BP.csv	GO:0003179	GO:0003179	heart valve morphogenesis	51	-0.640827	-1.33908	0.00802407	0.114321	0.100285	3286	tags=37%, list=18%, signal=31%	1942/4846/6662/642658/2626/23462/54567/2625/7040/26508/8642/650/9353/7042/6910/64220/140628/57057/2006
742	group_GSEA_Go_BP.csv	GO:0010575	GO:0010575	positive regulation of vascular endothelial growth factor production	28	-0.640833	-1.29314	0.0489297	0.29568	0.259377	2851	tags=36%, list=15%, signal=30%	2626/7040/284340/3569/5743/55959/718/3552/3553/23213
743	group_GSEA_Go_BP.csv	GO:0051952	GO:0051952	regulation of amine transport	95	-0.641412	-1.37037	0.001	0.0293189	0.0257191	4314	tags=57%, list=23%, signal=44%	5071/551/26281/5027/5997/8564/6623/186/552/7349/1141/341359/9066/5020/2693/91683/885/6861/390084/1268/59272/84258/1137/3356/3745/5865/4887/4923/64805/143425/6857/4889/8973/7200/1813/1812/1394/130497/18/10991/2917/477/3737/183/150/7432/6529/5999/2865/1392/148281/3351/6387/9900
744	group_GSEA_Go_BP.csv	GO:0035249	GO:0035249	synaptic transmission, glutamatergic	92	-0.641543	-1.36929	0.001	0.0293189	0.0257191	3075	tags=61%, list=16%, signal=51%	4208/10368/594857/116/5649/5021/2911/2897/5071/440279/5270/4763/8564/2895/5023/7349/2898/7124/27092/1956/1268/2918/9162/2916/3356/9746/4887/57030/246213/6857/149111/22941/50944/5743/729230/2902/1813/1812/27091/53358/2917/477/59284/10369/2913/7143/4920/6347/59283/23025/57084/2891/3351/2899/4914/9378
745	group_GSEA_Go_BP.csv	GO:0010665	GO:0010665	regulation of cardiac muscle cell apoptotic process	34	-0.641587	-1.31387	0.0292929	0.231464	0.203045	2851	tags=29%, list=15%, signal=25%	2626/93649/26471/5458/815/3579/183/4058/6423/1482
746	group_GSEA_Go_BP.csv	GO:0007187	GO:0007187	G protein-coupled receptor signaling pathway, coupled to cyclic nucleotide second messenger	248	-0.642295	-1.39723	0.000999001	0.0293189	0.0257191	3411	tags=42%, list=18%, signal=35%	2769/4543/6752/768239/222487/148/575/139378/10267/111/776/23284/390154/1909/390084/2774/6754/1268/2918/5745/4988/2916/2829/3356/8549/266977/9630/10266/4887/1131/64805/5731/2015/1903/5064/59350/10149/2691/1395/2780/170589/153/3274/10203/122876/2587/8484/1816/155/797/6755/4283/1813/3355/1812/1394/146/8477/4158/8698/2917/4852/5732/5733/1901/1906/1129/183/3973/150/2913/7432/3361/2641/6373/4842/3360/2…
747	group_GSEA_Go_BP.csv	GO:0003176	GO:0003176	aortic valve development	32	-0.642354	-1.30847	0.0333333	0.245513	0.215369	3755	tags=44%, list=20%, signal=35%	6586/7133/1942/4846/6662/2626/54567/2625/7040/26508/9353/140628/57057/2006
748	group_GSEA_Go_BP.csv	GO:0010591	GO:0010591	regulation of lamellipodium assembly	30	-0.642587	-1.30578	0.0404858	0.266535	0.23381	2782	tags=27%, list=15%, signal=23%	2039/3273/5880/9353/2660/7401/90167/7471
749	group_GSEA_Go_BP.csv	GO:0070098	GO:0070098	chemokine-mediated signaling pathway	86	-0.642594	-1.36908	0.001	0.0293189	0.0257191	3552	tags=48%, list=19%, signal=39%	6359/1235/6346/6357/6374/1234/6364/3576/2833/1233/2829/7066/643/6360/6355/6369/5197/9353/729230/5473/4283/6352/10563/6354/6356/7032/54209/6348/3579/1906/6373/3627/57007/9034/5196/1232/6347/6387/10344/1240/2532
750	group_GSEA_Go_BP.csv	GO:0070509	GO:0070509	calcium ion import	78	-0.642595	-1.36706	0.001	0.0293189	0.0257191	4293	tags=47%, list=23%, signal=37%	778/100507027/846/6406/7779/859/774/2645/799/7349/8913/1950/776/728215/8911/2916/7223/56302/773/6348/5155/8912/2641/115352/55503/779/1392/5159/6347/57119/6387/6781/6547/10268/775/5350/6588
751	group_GSEA_Go_BP.csv	GO:0019433	GO:0019433	triglyceride catabolic process	35	-0.643086	-1.31827	0.0212336	0.192016	0.168441	2978	tags=43%, list=16%, signal=36%	646486/6653/2172/150379/2822/2173/13/335/26291/344/285848/337/5294/4023/3990
752	group_GSEA_Go_BP.csv	GO:0030204	GO:0030204	chondroitin sulfate metabolic process	39	-0.643445	-1.32878	0.015121	0.166025	0.14564	4592	tags=49%, list=24%, signal=37%	56548/92126/166012/1463/63827/3425/55790/50859/29940/1464/1634/83539/50515/64131/133584/23553/633/51363/1462
753	group_GSEA_Go_BP.csv	GO:0042220	GO:0042220	response to cocaine	54	-0.643985	-1.3473	0.00501002	0.0837585	0.0734746	3218	tags=39%, list=17%, signal=32%	1141/5020/27092/23284/390084/1268/4988/3356/3359/1816/84152/1813/1812/1394/6870/18/6529/6531/5999/1392/3351
754	group_GSEA_Go_BP.csv	GO:0007218	GO:0007218	neuropeptide signaling pathway	101	-0.644386	-1.37941	0.000999001	0.0293189	0.0257191	3544	tags=49%, list=19%, signal=40%	11249/2832/10887/5173/7349/6752/10316/85569/6754/11247/10874/4988/4887/441509/4923/5443/4889/8001/2587/8484/11248/6755/114815/51289/1394/6447/4158/2837/4852/84539/10178/56923/53831/5179/2831/3062/128674/51083/57537/256933/84634/2825/2847/6751/4879/5539/57105/10886/6863
755	group_GSEA_Go_BP.csv	GO:0030510	GO:0030510	regulation of BMP signaling pathway	86	-0.644565	-1.37328	0.001	0.0293189	0.0257191	3081	tags=34%, list=16%, signal=28%	10468/6653/2626/23090/9350/6422/390598/91851/9573/402117/25928/8646/94031/64388/375567/2200/9241/168667/94/5046/26585/652991/4036/50964/6423/7021/23213/7471/6664
756	group_GSEA_Go_BP.csv	GO:0007189	GO:0007189	adenylate cyclase-activating G protein-coupled receptor signaling pathway	135	-0.644804	-1.38873	0.000999001	0.0293189	0.0257191	3192	tags=43%, list=17%, signal=36%	222487/148/575/139378/10267/111/23284/390084/2774/6754/5745/4988/8549/266977/10266/5731/2015/59350/10149/2691/170589/153/10203/122876/2587/1816/155/797/4283/1813/1812/1394/146/8477/4158/8698/5732/5733/3973/150/7432/2641/6373/4842/3627/79924/5196/5739/2849/84873/84658/114/10268/4160/2740/5350/5737/64123
757	group_GSEA_Go_BP.csv	GO:0001974	GO:0001974	blood vessel remodeling	39	-0.646525	-1.33514	0.0131048	0.151825	0.133184	5187	tags=56%, list=28%, signal=41%	4193/4208/2296/2324/2303/186/558/2255/4846/7052/1621/54567/10512/7040/3273/3200/729230/1636/183/94/633/84870
758	group_GSEA_Go_BP.csv	GO:0003416	GO:0003416	endochondral bone growth	43	-0.646541	-1.34047	0.0110775	0.140748	0.123467	845	tags=40%, list=5%, signal=38%	2261/1294/4322/1291/9350/1311/81578/2263/1690/51435/7373/5915/1292/6781/5212/340706/344901
759	group_GSEA_Go_BP.csv	GO:0071674	GO:0071674	mononuclear cell migration	85	-0.647102	-1.37735	0.001	0.0293189	0.0257191	3552	tags=40%, list=19%, signal=33%	6359/6346/120425/6357/8600/7124/6364/2321/7040/6360/284340/3569/6355/6369/5919/5175/9353/729230/6352/5054/6354/2660/6356/6348/5155/653/3627/6347/7941/26585/6387/2358/10344/1240
760	group_GSEA_Go_BP.csv	GO:0045600	GO:0045600	positive regulation of fat cell differentiation	61	-0.647914	-1.36133	0.00200401	0.0457645	0.0401455	4056	tags=43%, list=22%, signal=34%	252995/688/149685/11197/1051/5468/55885/6783/3356/1050/10974/81029/7704/6422/5919/9573/201501/5743/650/2487/4023/6423/84935/1240/3358/7494
761	group_GSEA_Go_BP.csv	GO:0099174	GO:0099174	regulation of presynapse organization	30	-0.647978	-1.31673	0.0354251	0.253186	0.2221	2339	tags=27%, list=12%, signal=23%	147381/9746/7476/4916/114798/22865/26280/9378
762	group_GSEA_Go_BP.csv	GO:1903514	GO:1903514	release of sequestered calcium ion into cytosol by endoplasmic reticulum	32	-0.648132	-1.32024	0.0262626	0.216015	0.189492	4561	tags=50%, list=24%, signal=38%	287/6546/201140/10345/6261/1234/844/9472/6262/1193/196541/2946/477/6348/775/5350
763	group_GSEA_Go_BP.csv	GO:0072347	GO:0072347	response to anesthetic	77	-0.648154	-1.37985	0.001	0.0293189	0.0257191	3218	tags=38%, list=17%, signal=31%	221935/84557/1141/5020/27092/23284/390084/1268/4988/3356/5582/3359/1816/84152/2902/1813/1812/1394/6870/18/6529/6531/5179/5999/1392/2155/3351/114/6863
764	group_GSEA_Go_BP.csv	GO:0046850	GO:0046850	regulation of bone remodeling	48	-0.648438	-1.35119	0.00603622	0.0941182	0.0825623	4977	tags=56%, list=27%, signal=41%	952/7128/4054/3375/51208/4763/5027/632/3953/3690/9066/8600/1956/53832/6696/3635/5166/3569/6422/4982/1901/2697/6850/26585/4160/338773/81501
765	group_GSEA_Go_BP.csv	GO:0051931	GO:0051931	regulation of sensory perception	37	-0.648756	-1.33332	0.0151822	0.166136	0.145738	3151	tags=41%, list=17%, signal=34%	5020/885/11280/10874/4988/4887/4923/80763/2906/6348/1906/56923/7432/55273/55
766	group_GSEA_Go_BP.csv	GO:0010574	GO:0010574	regulation of vascular endothelial growth factor production	31	-0.648862	-1.31956	0.0272727	0.221966	0.194713	2851	tags=35%, list=15%, signal=30%	2626/7040/284340/3569/5743/729230/55959/718/3552/3553/23213
767	group_GSEA_Go_BP.csv	GO:0032570	GO:0032570	response to progesterone	45	-0.649034	-1.34742	0.0060423	0.0941182	0.0825623	2305	tags=31%, list=12%, signal=27%	7040/2706/10266/1446/1828/378807/4821/730249/5732/79820/7042/7097/5764/6663
768	group_GSEA_Go_BP.csv	GO:0010658	GO:0010658	striated muscle cell apoptotic process	39	-0.649216	-1.3407	0.0110887	0.140748	0.123467	3076	tags=31%, list=16%, signal=26%	2792/2626/93649/26471/5458/815/3579/183/4058/655/6423/1482
769	group_GSEA_Go_BP.csv	GO:0070296	GO:0070296	sarcoplasmic reticulum calcium ion transport	37	-0.649298	-1.33443	0.0151822	0.166136	0.145738	4561	tags=49%, list=24%, signal=37%	287/6546/201140/100507027/10345/6261/1234/844/9472/6262/1193/196541/2946/477/6348/775/5350/6588
770	group_GSEA_Go_BP.csv	GO:0051281	GO:0051281	positive regulation of release of sequestered calcium ion into cytosol	40	-0.649535	-1.34267	0.00907258	0.1241	0.108863	2245	tags=35%, list=12%, signal=31%	844/9001/187/4923/57214/9472/4283/1812/2946/9002/6373/3627/7070/623
771	group_GSEA_Go_BP.csv	GO:0010812	GO:0010812	negative regulation of cell-substrate adhesion	62	-0.649721	-1.36619	0.002	0.0457645	0.0401455	1192	tags=39%, list=6%, signal=36%	6695/4763/2192/8324/1029/5340/1946/90102/2039/340533/5054/94/285/4653/2633/55966/1277/395/10631/3204/4321/9723/347/7471
772	group_GSEA_Go_BP.csv	GO:0033280	GO:0033280	response to vitamin D	35	-0.649801	-1.33204	0.0171891	0.175146	0.153641	3091	tags=40%, list=16%, signal=33%	2242/5251/7040/6696/8074/6422/5743/5179/655/920/3627/1591/6781/5764
773	group_GSEA_Go_BP.csv	GO:0045124	GO:0045124	regulation of bone resorption	40	-0.650082	-1.3438	0.00907258	0.1241	0.108863	4977	tags=55%, list=27%, signal=40%	952/7128/4054/3375/51208/4763/5027/632/3690/8600/1956/53832/6696/3635/5166/3569/4982/1901/6850/4160/338773/81501
774	group_GSEA_Go_BP.csv	GO:0010518	GO:0010518	positive regulation of phospholipase activity	58	-0.650289	-1.3646	0.002002	0.0457645	0.0401455	3693	tags=53%, list=20%, signal=43%	2261/552/7294/2247/2769/10316/9170/148/5031/1956/1909/627/2321/3356/5156/64805/5330/6352/6401/4916/117/8698/5322/344/185/56923/183/2263/5159/3357/395
775	group_GSEA_Go_BP.csv	GO:0015721	GO:0015721	bile acid and bile salt transport	27	-0.650799	-1.30944	0.0418367	0.272916	0.239407	3445	tags=44%, list=18%, signal=36%	5205/28234/6579/338821/1645/201780/9971/10599/345274/8714/53919/8647
776	group_GSEA_Go_BP.csv	GO:0035909	GO:0035909	aorta morphogenesis	30	-0.652488	-1.32589	0.0313765	0.237826	0.208626	3203	tags=33%, list=17%, signal=28%	4638/23462/54567/6899/2138/94/7042/5159/7021/1281
777	group_GSEA_Go_BP.csv	GO:2000310	GO:2000310	regulation of NMDA receptor activity	36	-0.652712	-1.33969	0.012109	0.146842	0.128813	1669	tags=33%, list=9%, signal=30%	2893/2890/2048/4747/729230/2902/2892/1392/6347/306/2891/2904
778	group_GSEA_Go_BP.csv	GO:0010573	GO:0010573	vascular endothelial growth factor production	33	-0.65366	-1.33216	0.0182002	0.177397	0.155617	2851	tags=36%, list=15%, signal=31%	2626/9508/7040/284340/3569/5743/729230/55959/718/3552/3553/23213
779	group_GSEA_Go_BP.csv	GO:0051930	GO:0051930	regulation of sensory perception of pain	36	-0.653674	-1.34166	0.012109	0.146842	0.128813	3151	tags=42%, list=17%, signal=35%	5020/885/11280/10874/4988/4887/4923/80763/2906/6348/1906/56923/7432/55273/55
780	group_GSEA_Go_BP.csv	GO:1905606	GO:1905606	regulation of presynapse assembly	29	-0.654578	-1.32613	0.0324215	0.242919	0.213093	2339	tags=28%, list=12%, signal=24%	147381/9746/7476/4916/114798/22865/26280/9378
781	group_GSEA_Go_BP.csv	GO:0014808	GO:0014808	release of sequestered calcium ion into cytosol by sarcoplasmic reticulum	31	-0.654607	-1.33125	0.0232323	0.202702	0.177814	4561	tags=52%, list=24%, signal=39%	287/6546/201140/10345/6261/1234/844/9472/6262/1193/196541/2946/477/6348/775/5350
782	group_GSEA_Go_BP.csv	GO:0060384	GO:0060384	innervation	27	-0.654669	-1.31722	0.0367347	0.257397	0.225794	4231	tags=56%, list=23%, signal=43%	8829/5270/84570/5979/2561/26018/10371/5582/84189/7412/55959/23025/4914/4884/23213
783	group_GSEA_Go_BP.csv	GO:0019233	GO:0019233	sensory perception of pain	101	-0.654958	-1.40204	0.000999001	0.0293189	0.0257191	3218	tags=42%, list=17%, signal=35%	1141/5020/3673/885/11280/1268/10874/4988/1137/6335/3356/3218/55107/4887/4923/59344/3736/6323/8989/80763/2695/5743/729230/55800/2902/2906/7345/6348/1906/56923/3737/7432/5179/3751/6347/6387/4914/6336/55273/55/623/6863
784	group_GSEA_Go_BP.csv	GO:0008038	GO:0008038	neuron recognition	48	-0.655125	-1.36512	0.00503018	0.0837585	0.0734746	4231	tags=46%, list=23%, signal=36%	8829/152330/84665/2043/50863/55079/2049/6900/55118/1268/1949/10371/27255/2048/128434/2596/4897/1826/63923/91624/26047/4978
785	group_GSEA_Go_BP.csv	GO:0097484	GO:0097484	dendrite extension	34	-0.655683	-1.34274	0.0161616	0.169997	0.149125	2825	tags=29%, list=15%, signal=25%	57699/84258/9362/6857/53335/59284/9699/23025/344901/22999
786	group_GSEA_Go_BP.csv	GO:0010880	GO:0010880	regulation of release of sequestered calcium ion into cytosol by sarcoplasmic reticulum	28	-0.65599	-1.32372	0.0346585	0.250735	0.21995	2245	tags=46%, list=12%, signal=41%	287/6546/201140/10345/844/9472/6262/1193/196541/2946/477/775/5350
787	group_GSEA_Go_BP.csv	GO:0050927	GO:0050927	positive regulation of positive chemotaxis	25	-0.656663	-1.31259	0.0431211	0.27585	0.241981	4455	tags=72%, list=24%, signal=55%	2277/9048/7422/846/566/2255/2152/3673/7857/3576/1233/7424/4916/1901/2155/2150/6387/1012
788	group_GSEA_Go_BP.csv	GO:0051954	GO:0051954	positive regulation of amine transport	35	-0.657248	-1.3473	0.0101112	0.132244	0.116007	4307	tags=71%, list=23%, signal=55%	2668/1815/9607/65018/5021/551/5027/8564/552/1141/5020/885/59272/3745/5865/4887/4923/7200/1813/18/10991/183/7432/6529/6387
789	group_GSEA_Go_BP.csv	GO:0002701	GO:0002701	negative regulation of production of molecular mediator of immune response	35	-0.657432	-1.34768	0.0101112	0.132244	0.116007	3955	tags=43%, list=21%, signal=34%	3718/2213/7124/30009/10225/684/7040/3456/335/90865/11005/7042/115352/11213/284
790	group_GSEA_Go_BP.csv	GO:0007200	GO:0007200	phospholipase C-activating G protein-coupled receptor signaling pathway	98	-0.657531	-1.40655	0.000999001	0.0293189	0.0257191	3530	tags=47%, list=19%, signal=38%	88/10161/2769/10316/887/148/5031/7052/5745/4988/3356/55107/9630/5030/64805/2850/2828/1816/1813/1812/1394/7201/8477/5733/1901/2846/185/3579/1906/56923/1129/183/3973/150/9002/7432/2843/3062/2357/2150/2359/2358/3814/2151/1240/3358
791	group_GSEA_Go_BP.csv	GO:0010662	GO:0010662	regulation of striated muscle cell apoptotic process	36	-0.657589	-1.3497	0.0100908	0.132244	0.116007	2851	tags=31%, list=15%, signal=26%	2626/93649/26471/5458/815/3579/183/4058/655/6423/1482
792	group_GSEA_Go_BP.csv	GO:0010742	GO:0010742	macrophage derived foam cell differentiation	34	-0.658545	-1.3486	0.0141414	0.158476	0.139019	3406	tags=50%, list=18%, signal=41%	8435/3690/1401/1071/5468/9370/9619/3606/7040/1437/5320/185/183/5196/4023/4481/948
793	group_GSEA_Go_BP.csv	GO:0090077	GO:0090077	foam cell differentiation	34	-0.658545	-1.3486	0.0141414	0.158476	0.139019	3406	tags=50%, list=18%, signal=41%	8435/3690/1401/1071/5468/9370/9619/3606/7040/1437/5320/185/183/5196/4023/4481/948
794	group_GSEA_Go_BP.csv	GO:1905314	GO:1905314	semi-lunar valve development	37	-0.658629	-1.35361	0.0131579	0.152169	0.133486	3755	tags=46%, list=20%, signal=37%	6586/7133/1942/4846/6662/2626/23462/54567/2625/7040/26508/9353/7042/64220/140628/57057/2006
795	group_GSEA_Go_BP.csv	GO:0030325	GO:0030325	adrenal gland development	25	-0.658883	-1.31703	0.0431211	0.27585	0.241981	5690	tags=76%, list=30%, signal=53%	4192/2516/1028/10272/10370/84159/4763/429/7481/5087/5156/3642/335/7490/190/1394/1392/64220/27122
796	group_GSEA_Go_BP.csv	GO:0051966	GO:0051966	regulation of synaptic transmission, glutamatergic	69	-0.65953	-1.39364	0.001	0.0293189	0.0257191	3075	tags=46%, list=16%, signal=39%	2898/7124/27092/1956/1268/2918/9162/2916/3356/4887/6857/22941/50944/5743/729230/1813/1812/27091/2917/477/59284/10369/2913/7143/4920/6347/59283/23025/3351/2899/4914/9378
797	group_GSEA_Go_BP.csv	GO:0061037	GO:0061037	negative regulation of cartilage development	27	-0.660501	-1.32896	0.0295918	0.233542	0.204868	4963	tags=63%, list=26%, signal=46%	5744/8200/652/4054/579/7481/7483/6662/144347/2736/2202/1513/2487/9241/5915/26585/81792
798	group_GSEA_Go_BP.csv	GO:0055090	GO:0055090	acylglycerol homeostasis	35	-0.660722	-1.35442	0.0101112	0.132244	0.116007	2347	tags=40%, list=13%, signal=35%	3606/84647/3172/9971/335/51085/2695/344/123876/114899/337/4023/3990/7494
799	group_GSEA_Go_BP.csv	GO:0070328	GO:0070328	triglyceride homeostasis	35	-0.660722	-1.35442	0.0101112	0.132244	0.116007	2347	tags=40%, list=13%, signal=35%	3606/84647/3172/9971/335/51085/2695/344/123876/114899/337/4023/3990/7494
800	group_GSEA_Go_BP.csv	GO:0032890	GO:0032890	regulation of organic acid transport	57	-0.660914	-1.38425	0.00200602	0.0457645	0.0401455	4307	tags=47%, list=23%, signal=37%	551/5027/5997/8564/186/552/5020/885/8600/6754/59272/4923/8529/4889/7200/130497/18/10991/2917/477/1906/183/6529/5999/6850/9900/3553
801	group_GSEA_Go_BP.csv	GO:0042481	GO:0042481	regulation of odontogenesis	26	-0.660964	-1.32359	0.0368852	0.257397	0.225794	5159	tags=65%, list=28%, signal=47%	1435/652/6469/265/54829/152816/340419/58524/7040/7475/860/4982/650/80326/1906/10117/9313
802	group_GSEA_Go_BP.csv	GO:0043090	GO:0043090	amino acid import	26	-0.661033	-1.32373	0.0368852	0.257397	0.225794	4550	tags=50%, list=24%, signal=38%	6507/3766/5997/6505/6506/4923/84889/57030/477/183/6529/5999/6511
803	group_GSEA_Go_BP.csv	GO:0032892	GO:0032892	positive regulation of organic acid transport	34	-0.661727	-1.35511	0.0121212	0.146842	0.128813	4307	tags=53%, list=23%, signal=41%	551/5027/8564/552/5020/885/8600/6754/59272/4923/8529/7200/18/10991/1906/183/6529/3553
804	group_GSEA_Go_BP.csv	GO:0042745	GO:0042745	circadian sleep/wake cycle	26	-0.662183	-1.32603	0.0358607	0.253655	0.222511	3400	tags=38%, list=18%, signal=32%	5730/1141/10874/4887/2691/1437/1813/3737/3062/1392
805	group_GSEA_Go_BP.csv	GO:0001964	GO:0001964	startle response	27	-0.662349	-1.33268	0.0285714	0.228256	0.200231	3856	tags=56%, list=21%, signal=44%	5071/2895/4861/7349/2173/3736/2902/1813/1812/84189/2906/6531/5179/64478/9378
806	group_GSEA_Go_BP.csv	GO:0060143	GO:0060143	positive regulation of syncytium formation by plasma membrane fusion	27	-0.663226	-1.33444	0.0285714	0.228256	0.200231	3100	tags=44%, list=17%, signal=37%	4656/575/963/8536/92304/9750/128506/8521/4283/8740/54209/81501
807	group_GSEA_Go_BP.csv	GO:0003180	GO:0003180	aortic valve morphogenesis	28	-0.663511	-1.3389	0.0285423	0.228256	0.200231	3755	tags=46%, list=20%, signal=37%	6586/1942/4846/6662/2626/54567/2625/7040/26508/9353/140628/57057/2006
808	group_GSEA_Go_BP.csv	GO:0045822	GO:0045822	negative regulation of heart contraction	24	-0.663849	-1.31961	0.0350877	0.252007	0.221066	4242	tags=46%, list=23%, signal=36%	3717/3558/57731/186/148/80763/477/10008/5294/5350/6863
809	group_GSEA_Go_BP.csv	GO:0060536	GO:0060536	cartilage morphogenesis	29	-0.664143	-1.34551	0.0263425	0.216015	0.189492	1129	tags=31%, list=6%, signal=29%	7477/81578/1690/51435/7373/1292/6781/5212/340706
810	group_GSEA_Go_BP.csv	GO:0050926	GO:0050926	regulation of positive chemotaxis	26	-0.664162	-1.32999	0.0317623	0.239634	0.210212	4455	tags=73%, list=24%, signal=56%	2277/9048/7422/846/566/2255/2152/3673/7857/3576/1233/7424/4916/1901/285/2155/2150/6387/1012
811	group_GSEA_Go_BP.csv	GO:0002548	GO:0002548	monocyte chemotaxis	62	-0.664164	-1.39656	0.002	0.0457645	0.0401455	3552	tags=42%, list=19%, signal=34%	6359/6346/6357/8600/6364/2321/6360/284340/3569/6355/6369/9353/729230/6352/5054/6354/6356/6348/5155/3627/6347/7941/26585/6387/2358/10344
812	group_GSEA_Go_BP.csv	GO:0086019	GO:0086019	cell-cell signaling involved in cardiac conduction	30	-0.664218	-1.34973	0.0202429	0.18616	0.163304	3252	tags=47%, list=17%, signal=39%	6331/388591/8913/3762/776/6330/5318/6262/3760/55800/2697/6336/10021/775
813	group_GSEA_Go_BP.csv	GO:0032835	GO:0032835	glomerulus development	61	-0.664278	-1.39572	0.00200401	0.0457645	0.0401455	3697	tags=52%, list=20%, signal=42%	5979/186/1286/5076/4811/9370/4868/10409/9788/5156/59/1285/100133941/2028/7490/2828/5175/26508/8710/130497/9241/5420/5155/285/7010/655/4854/5159/284/3975/55959/23213
814	group_GSEA_Go_BP.csv	GO:0071675	GO:0071675	regulation of mononuclear cell migration	44	-0.666433	-1.38268	0.00302115	0.0595489	0.0522375	2305	tags=34%, list=12%, signal=30%	7040/284340/5919/9353/729230/6352/5054/2660/653/3627/7941/26585/6387/2358/1240
815	group_GSEA_Go_BP.csv	GO:0060065	GO:0060065	uterus development	22	-0.666585	-1.31413	0.0437956	0.27652	0.242569	2719	tags=50%, list=15%, signal=43%	3205/5950/2625/93649/7484/80000/668/7476/7042/3975/64220
816	group_GSEA_Go_BP.csv	GO:0032594	GO:0032594	protein transport within lipid bilayer	33	-0.667442	-1.36025	0.0121335	0.146842	0.128813	2792	tags=42%, list=15%, signal=36%	10368/160622/481/9912/27092/6616/80852/100133941/112755/27091/59284/10369/5602/59283
817	group_GSEA_Go_BP.csv	GO:0007210	GO:0007210	serotonin receptor signaling pathway	36	-0.667795	-1.37065	0.00706357	0.104003	0.0912335	2760	tags=42%, list=15%, signal=36%	1133/285242/390154/170572/3356/1131/3274/3359/3355/1129/3361/3360/3357/3351/3358
818	group_GSEA_Go_BP.csv	GO:1905809	GO:1905809	negative regulation of synapse organization	24	-0.667974	-1.32781	0.0309598	0.236428	0.207399	2283	tags=42%, list=12%, signal=37%	6585/26052/1942/4761/2045/25791/7097/4776/2904/5764
819	group_GSEA_Go_BP.csv	GO:0032094	GO:0032094	response to food	38	-0.668684	-1.37763	0.00504541	0.0837585	0.0734746	3370	tags=39%, list=18%, signal=32%	7349/2520/5020/2693/885/4988/5582/2691/80763/1208/2538/4852/389383/340204/4504
820	group_GSEA_Go_BP.csv	GO:0050482	GO:0050482	arachidonic acid secretion	31	-0.669139	-1.3608	0.0171717	0.175146	0.153641	2666	tags=45%, list=14%, signal=39%	6754/84647/4923/5320/1813/255189/5322/1636/26279/391013/56923/50487/6850/624
821	group_GSEA_Go_BP.csv	GO:1903963	GO:1903963	arachidonate transport	31	-0.669139	-1.3608	0.0171717	0.175146	0.153641	2666	tags=45%, list=14%, signal=39%	6754/84647/4923/5320/1813/255189/5322/1636/26279/391013/56923/50487/6850/624
822	group_GSEA_Go_BP.csv	GO:0003197	GO:0003197	endocardial cushion development	44	-0.669758	-1.38958	0.00302115	0.0595489	0.0522375	3145	tags=39%, list=17%, signal=32%	4846/6662/2626/23462/221662/26508/8642/650/9241/94/7042/655/653/6910/55273/140628/57057
823	group_GSEA_Go_BP.csv	GO:0048265	GO:0048265	response to pain	30	-0.669775	-1.36102	0.0192308	0.180942	0.158726	3697	tags=50%, list=20%, signal=40%	5979/774/7349/1621/6335/2701/5582/644139/8989/57121/1394/56923/1392/4914/6863
824	group_GSEA_Go_BP.csv	GO:0061384	GO:0061384	heart trabecula morphogenesis	32	-0.670436	-1.36568	0.0111111	0.140748	0.123467	2761	tags=41%, list=15%, signal=35%	9510/859/23462/5950/54567/27302/1901/9241/7010/7042/655/653/1482
825	group_GSEA_Go_BP.csv	GO:2000311	GO:2000311	regulation of AMPA receptor activity	25	-0.670796	-1.34084	0.0277207	0.224769	0.197172	1743	tags=44%, list=9%, signal=40%	27092/149111/23237/22941/50944/27091/59284/10369/146395/59283/440829
826	group_GSEA_Go_BP.csv	GO:0060251	GO:0060251	regulation of glial cell proliferation	30	-0.67089	-1.36329	0.0192308	0.180942	0.158726	131	tags=27%, list=1%, signal=27%	5324/7124/430/3569/3553/5764/6664/6663
827	group_GSEA_Go_BP.csv	GO:0015012	GO:0015012	heparan sulfate proteoglycan biosynthetic process	32	-0.671234	-1.3673	0.0111111	0.140748	0.123467	3685	tags=34%, list=20%, signal=28%	55790/64711/266722/222537/29940/64579/64131/9951/9953/9956/9955
828	group_GSEA_Go_BP.csv	GO:0021871	GO:0021871	forebrain regionalization	24	-0.671769	-1.33536	0.0299278	0.233882	0.205166	4853	tags=71%, list=26%, signal=53%	652/6469/80055/7482/389549/55079/5080/7080/170825/6496/650/2018/7477/63950/2016/3975/7471
829	group_GSEA_Go_BP.csv	GO:0098815	GO:0098815	modulation of excitatory postsynaptic potential	40	-0.671932	-1.38897	0.00504032	0.0837585	0.0734746	2224	tags=30%, list=12%, signal=26%	4887/112755/22941/50944/7476/2902/9699/5999/9378/81832/57502/22999
830	group_GSEA_Go_BP.csv	GO:0035640	GO:0035640	exploration behavior	26	-0.672282	-1.34625	0.0204918	0.187654	0.164614	2688	tags=46%, list=14%, signal=40%	1803/186/2571/57338/1137/2695/1394/18/5179/7143/1392/1620
831	group_GSEA_Go_BP.csv	GO:0032232	GO:0032232	negative regulation of actin filament bundle assembly	24	-0.672336	-1.33648	0.0299278	0.233882	0.205166	1512	tags=29%, list=8%, signal=27%	90102/50944/23671/1901/90167/4653/395
832	group_GSEA_Go_BP.csv	GO:0060142	GO:0060142	regulation of syncytium formation by plasma membrane fusion	29	-0.673117	-1.36369	0.0182371	0.177491	0.155699	3100	tags=45%, list=17%, signal=37%	4656/575/963/8536/92304/9750/128506/8521/4283/8740/54209/3627/81501
833	group_GSEA_Go_BP.csv	GO:0098801	GO:0098801	regulation of renal system process	35	-0.673441	-1.3805	0.00707786	0.104003	0.0912335	3944	tags=51%, list=21%, signal=41%	10699/186/552/5020/9370/4881/80763/1813/81285/185/2697/1906/5155/183/2150/6781/4879/6863
834	group_GSEA_Go_BP.csv	GO:0010882	GO:0010882	regulation of cardiac muscle contraction by calcium ion signaling	25	-0.673859	-1.34696	0.0256674	0.215361	0.188919	1524	tags=24%, list=8%, signal=22%	6262/1193/2946/477/775/5350
835	group_GSEA_Go_BP.csv	GO:0046716	GO:0046716	muscle cell cellular homeostasis	21	-0.674674	-1.33047	0.0458333	0.283877	0.249023	2305	tags=33%, list=12%, signal=29%	859/7040/120071/2660/4015/137868/1134
836	group_GSEA_Go_BP.csv	GO:0030206	GO:0030206	chondroitin sulfate biosynthetic process	26	-0.675115	-1.35193	0.0194672	0.1825	0.160093	4592	tags=54%, list=24%, signal=41%	56548/166012/1463/63827/55790/29940/1464/1634/83539/50515/64131/633/51363/1462
837	group_GSEA_Go_BP.csv	GO:0015813	GO:0015813	L-glutamate transmembrane transport	23	-0.675216	-1.3364	0.0290155	0.23039	0.202103	4550	tags=48%, list=24%, signal=36%	6507/3766/6505/6506/4923/57030/246213/477/6511/6512/57084
838	group_GSEA_Go_BP.csv	GO:1903170	GO:1903170	negative regulation of calcium ion transmembrane transport	38	-0.675929	-1.39256	0.00403633	0.0732048	0.0642167	2305	tags=32%, list=12%, signal=28%	7040/4923/1813/1394/1193/2946/477/6236/150/5350/6588/28954
839	group_GSEA_Go_BP.csv	GO:0021516	GO:0021516	dorsal spinal cord development	22	-0.67604	-1.33277	0.0375391	0.259191	0.227367	4285	tags=64%, list=23%, signal=49%	5629/429/64211/340260/151449/219409/170825/3218/374946/644168/5081/3975/10660/7471
840	group_GSEA_Go_BP.csv	GO:0048485	GO:0048485	sympathetic nervous system development	21	-0.676314	-1.3337	0.04375	0.27652	0.242569	4231	tags=57%, list=23%, signal=44%	8829/4763/429/8626/10371/2625/2676/3642/91584/4914/7021/6664
841	group_GSEA_Go_BP.csv	GO:0003148	GO:0003148	outflow tract septum morphogenesis	27	-0.676811	-1.36177	0.0193878	0.182155	0.15979	861	tags=30%, list=5%, signal=28%	10512/6899/7042/2263/5915/4036/1482/57057
842	group_GSEA_Go_BP.csv	GO:0006953	GO:0006953	acute-phase response	47	-0.677347	-1.40894	0.00201207	0.0457645	0.0401455	4263	tags=62%, list=23%, signal=48%	2335/2056/5265/3929/54658/50616/2157/1051/1401/5005/9332/130120/8600/7124/5068/1268/325/6288/3569/6289/259249/5743/5004/5733/445/3240/3552/12/3553
843	group_GSEA_Go_BP.csv	GO:0035812	GO:0035812	renal sodium excretion	23	-0.677598	-1.34112	0.0290155	0.23039	0.202103	4307	tags=57%, list=23%, signal=44%	551/10699/186/552/5020/4881/80763/1813/185/1906/183/4879/6863
844	group_GSEA_Go_BP.csv	GO:0140131	GO:0140131	positive regulation of lymphocyte chemotaxis	21	-0.677829	-1.33669	0.04375	0.27652	0.242569	1419	tags=33%, list=8%, signal=31%	729230/8740/6352/10563/6354/9547/6348
845	group_GSEA_Go_BP.csv	GO:0060986	GO:0060986	endocrine hormone secretion	45	-0.677967	-1.40748	0.0020141	0.0457645	0.0401455	2489	tags=38%, list=13%, signal=33%	2625/654/3624/5443/2587/668/1394/3625/185/183/1392/114899/51083/5972/3814/3553/6863
846	group_GSEA_Go_BP.csv	GO:0071677	GO:0071677	positive regulation of mononuclear cell migration	24	-0.678207	-1.34815	0.0247678	0.211068	0.185153	3408	tags=46%, list=18%, signal=38%	6346/7124/7040/284340/729230/6352/5054/3627/7941/6387/2358
847	group_GSEA_Go_BP.csv	GO:0061213	GO:0061213	positive regulation of mesonephros development	21	-0.678784	-1.33857	0.0427083	0.275608	0.241769	4280	tags=67%, list=23%, signal=52%	51804/7422/55366/7482/186/5076/6662/10409/2625/7040/7490/9241/183/3975
848	group_GSEA_Go_BP.csv	GO:0072677	GO:0072677	eosinophil migration	24	-0.678794	-1.34932	0.0247678	0.211068	0.185153	3552	tags=62%, list=19%, signal=51%	11314/5734/6359/6346/6357/7857/6360/6355/6369/6352/6354/6356/6348/6347/10344
849	group_GSEA_Go_BP.csv	GO:0016486	GO:0016486	peptide hormone processing	31	-0.678841	-1.38053	0.010101	0.132244	0.116007	3970	tags=58%, list=21%, signal=46%	27344/10699/5122/1082/7252/59272/4803/1215/5125/2028/1511/6447/1636/1359/1081/5046/5126/5972
850	group_GSEA_Go_BP.csv	GO:0099601	GO:0099601	regulation of neurotransmitter receptor activity	73	-0.67909	-1.44281	0.001	0.0293189	0.0257191	1744	tags=36%, list=9%, signal=32%	160065/149111/23237/66004/2893/2890/2048/22941/50944/4747/729230/2902/27091/2892/59284/10369/1392/6347/306/146395/59283/440829/2891/2904/4884/81832
851	group_GSEA_Go_BP.csv	GO:0019226	GO:0019226	transmission of nerve impulse	72	-0.67938	-1.44005	0.001001	0.0293189	0.0257191	4326	tags=67%, list=23%, signal=51%	23114/551/8506/27094/288/57731/1133/6328/552/5023/2257/1143/6331/8913/2898/2693/3673/27092/11280/8911/6326/6335/27345/58524/6329/6332/3736/6323/1816/1812/27091/4916/54112/4897/1901/146183/59284/10369/3737/183/8912/10242/7143/3751/1134/59283/6336/26047
852	group_GSEA_Go_BP.csv	GO:0001953	GO:0001953	negative regulation of cell-matrix adhesion	38	-0.680569	-1.40212	0.00403633	0.0732048	0.0642167	1192	tags=34%, list=6%, signal=32%	90102/2039/340533/5054/94/4653/55966/395/10631/3204/4321/9723/347
853	group_GSEA_Go_BP.csv	GO:0045776	GO:0045776	negative regulation of blood pressure	44	-0.680731	-1.41235	0.0020141	0.0457645	0.0401455	3684	tags=50%, list=20%, signal=40%	186/9424/7349/5020/4846/148/9370/1268/4923/7424/153/1816/155/1813/18/4843/4842/2865/79924/1392/4879/623
854	group_GSEA_Go_BP.csv	GO:0060074	GO:0060074	synapse maturation	26	-0.68075	-1.36321	0.0153689	0.166289	0.145872	2283	tags=35%, list=12%, signal=30%	4761/5064/816/50944/4747/4776/9378/23544/84966
855	group_GSEA_Go_BP.csv	GO:0072111	GO:0072111	cell proliferation involved in kidney development	20	-0.680813	-1.32877	0.0421496	0.273615	0.240021	2489	tags=65%, list=13%, signal=56%	652/6469/2719/5727/2625/79727/7490/650/8710/130497/5155/655/5159
856	group_GSEA_Go_BP.csv	GO:0010460	GO:0010460	positive regulation of heart rate	24	-0.681373	-1.35445	0.0206398	0.188744	0.16557	4377	tags=54%, list=23%, signal=42%	3784/1907/552/6505/148/10874/153/6262/55800/6870/1906/5999/1908
857	group_GSEA_Go_BP.csv	GO:0003418	GO:0003418	growth plate cartilage chondrocyte differentiation	24	-0.681876	-1.35545	0.0196078	0.183429	0.160908	845	tags=29%, list=5%, signal=28%	81578/1690/51435/7373/1292/5212/340706
858	group_GSEA_Go_BP.csv	GO:1901522	GO:1901522	positive regulation of transcription from RNA polymerase II promoter involved in cellular response to chemical stimulus	22	-0.682192	-1.3449	0.0323253	0.242477	0.212706	1634	tags=18%, list=9%, signal=17%	860/650/4504/7494
859	group_GSEA_Go_BP.csv	GO:0007202	GO:0007202	activation of phospholipase C activity	31	-0.682286	-1.38754	0.00707071	0.104003	0.0912335	3639	tags=61%, list=19%, signal=49%	552/7294/2769/10316/9170/148/5031/1956/1909/627/3356/64805/5330/6401/117/8698/183/3357/395
860	group_GSEA_Go_BP.csv	GO:0033762	GO:0033762	response to glucagon	35	-0.682731	-1.39954	0.00505561	0.0837585	0.0734746	1130	tags=26%, list=6%, signal=24%	111/2706/26291/2641/445/114/9340/5105/2740
[truncated: 747 more rows]

## Sheet: S4
TableS4:FSIP2 relavant GO, KEGG and GSEA analysis (TCGA-SKCM)
[truncated: 1,127 more rows]

[truncated: 2 more sheets: S5, S6]
