# Supplementary material for: Association Between FSIP2 Mutation and an Improved Efficacy of Immune Checkpoint Inhibitors in Patients With Skin Cutaneous Melanoma
Source: Front Mol Biosci. 2021 May 24;8:629330. doi: 10.3389/fmolb.2021.629330 (PMC8186463; doi:10.3389/fmolb.2021.629330)
Supplement: Supplementary file 2 [file Table_2.XLSX]

## Sheet: Sheet6
Table S1.Comparison of clinical data of patients in the FSIP2-MT group and FSIP2-WT group in TCGA-SKCM cohort
Variables		FSIP2-MT (N=58)	FSIP2-WT (N=409)	P value	Overall (N=467)
Age at diagnosis				0.136529
	N	58	400		458
	Mean+sd	61.1±15.1	57.8±15.8		58.2±15.8
	Min-Max	25-90	15-90		15-90
	Median(Q1-Q3)	63(50.5-73)	58(47-41)		58(48-71)
Sex				0.0434658
	N	58	409		467
	Female	15(25.9)	163(39.9)		178(38.1)
	Male	43(74.1)	246(60.1)		289(61.9)
Race				1
	N	58	399		457
	White	57(98.3)	387(97.0)		444(97.2)
	Asian	1(1.7)	11(2.8)		12(2.6)
	Black or African American	0(0)	1(0.2)		1(0.2)
Ethnicity				1
	N	58	396		454
	Not Hispanic or Latino	57(98.3)	386(96.7)		443(97.6)
	Hispanic or Latino	1(1.7)	10(3.3)		11(2.4)
Patients' Neoplasm Cancer Status				0.389501
	N	55	377		432
	Tumor Free	31(56.4)	188(49.9)		219(50.7)
	With Tumor	24(43.6)	189(50.1)		213(49.3)
Status				0.675861
	N	58	409		467
	Alive	29(50.0)	217(53.1)		246(52.7)
	Dead	29(50.0)	192(46.9)		221(47.3)
OS(Month)				0.607269
	N	58	399		457
	Mean+sd	64.6±76.8	60.0±61.7		60.7±63.7
	Min-Max	0.3-339.9	0.2-369.7		0.2-369.7
	Median(Q1-Q3)	39.4(14.7-80.3)	36.4(16.8-77.7)		36.9(16.1-78.9)
Location of the samples				0.486549
	N	58	397		455
	Primary Tumor	17(29.3)	86(21.7)		103(22.6)
	Regional Cutaneous or Subcutaneous Tissue	10(17.2)	61(15.3)		71(15.6)
	Regional Lymph Node	23(39.7)	194(48.9)		217(47.7)
	Distant Metastasis	8(13.8)	56(14.1）		64(10.1)
Stage				0.657896
	N	55	374		429
	I/II NOS	1(1.8)	13(3.5)		14(3.3)
	Stage 0	1(1.8)	6(1.6)		7(1.6)
	Stage I	7(12.7)	70(18.7)		77(17.9)
	Stage II	23(41.8)	116(31.0)		139(32.4)
	Stage III	21(38.3)	148(39.6)		169(39.4)
	Stage IV	2(3.6)	21(5.6)		23(5.4)
