# Supplementary material for: Association Between FSIP2 Mutation and an Improved Efficacy of Immune Checkpoint Inhibitors in Patients With Skin Cutaneous Melanoma
Source: Front Mol Biosci. 2021 May 24;8:629330. doi: 10.3389/fmolb.2021.629330 (PMC8186463; doi:10.3389/fmolb.2021.629330)
Supplement: Supplementary file 3 [file Table_3.XLSX]

## Sheet: Sheet1
TableS2.Characteristics of ICI treated cohort					PATIENT_ID	FSIP2	Age	Gender	Response	OS_time	OS	PFS_time	PFS	histology	Drug Type	Other Concurrent Therapy	CR/PR	TMB
Variables			Statistics(N=120)		MEL-IPI_Pat127-TP-NB-SM-5X2R5-SM-5VWHP	0	24	FEMALE	PD	11.0667	0	1.03333	0	cutaneous	Combotherapy	no	CR/PR	3.21053
Age at diagnosis					MEL-IPI_Pat135-TP-NB-SM-7A152-SM-5VWHU	0	29	FEMALE	PD	2.7	0	1.23333	0	cutaneous	Combotherapy	no	CR/PR	4.78947
	N		79		MEL-IPI_Pat148-TP-NB-SM-5VWJQ-SM-5VWI8	0	36	FEMALE	PD	2.8	0	1.4	0	cutaneous	Combotherapy	no	CR/PR	6.86842
	Mean+sd		53.5±15.1		MEL-IPI_Pat138-TP-NB-SM-7A155-SM-5VWHX	1	39	FEMALE	SD	49.2667	0	1.53333	0	cutaneous	Combotherapy	no	CR/PR	157.526
	Min-Max		18-75		MEL-IPI_Pat106-TP-NT-SM-4CU6T-SM-4MGPK	0	43	FEMALE	PD	8.33333	0	1.6	0	cutaneous	Monotherapy	no	CR/PR	0.605263
	Median(Q1-Q3)		57(43-68)		MEL-IPI_Pat118-TP-NT-SM-5X2QV-SM-5X2RD	0	43	FEMALE	PD	10.4333	0	1.76667	0	cutaneous	Monotherapy	no	CR/PR	3.26316
Gender					MEL-IPI_Pat66-TP-NB-SM-4DK2R-SM-4NFVX	0	44	FEMALE	SD	21.7667	0	1.8	0	cutaneous	Monotherapy	no	CR/PR	8.71053
	N		120		MEL-IPI_Pat104-TP-NT-SM-4CU6R-SM-53U4Q	0	45	FEMALE	SD	7.9	0	1.86667	0	cutaneous	Monotherapy	no	CR/PR	0.973684
	Female		39(32.5)		MEL-IPI_Pat14-TP-NB-SM-53U3C-SM-4NFUG	0	47	FEMALE	PD	5.43333	0	1.86667	0	cutaneous	Monotherapy	no	CR/PR	1.36842
	Male		81(67.5)		MEL-IPI_Pat82-TP-NT-SM-4DK38-SM-53U55	1	54	FEMALE	PD	3.46667	0	2.03333	0	cutaneous	Monotherapy	no	CR/PR	11.7895
Response					MEL-IPI_Pat18-TP-NT-SM-4DK1E-SM-53U5D	0	55	FEMALE	PD	37.8	0	2.1	0	cutaneous	Monotherapy	no	CR/PR	1.02632
	N		120		MEL-IPI_Pat174-TP-NB-SM-5VOB4-SM-5VWIY	0	57	FEMALE	PR	22.9333	0	2.16667	1	cutaneous	Monotherapy	no	CR/PR	17.6579
	PR/CR		27(22.5)		MEL-IPI_Pat98-TP-NT-SM-4CU6L-SM-53U4K	0	57	FEMALE	PD	4.66667	0	2.23333	0	cutaneous	Monotherapy	no	CR/PR	1.84211
	SD/PD		93(77.5)		MEL-IPI_Pat58-TP-NB-SM-4DK2J-SM-4NFVP	0	59	FEMALE	PD	21.7333	0	2.23333	0	cutaneous	Monotherapy	no	CR/PR	72.7632
Drug Type					MEL-IPI_Pat03-TP-NB-SM-4DJZY-SM-4NFU5	0	61	FEMALE	PD	3.33333	0	2.26667	0	cutaneous	Monotherapy	no	CR/PR	12.0263
	N		120		MEL-IPI_Pat175-TP-NB-SM-7A15L-SM-5VWIZ	0	66	FEMALE	NA	3	0	2.26667	0	cutaneous	Monotherapy	no	CR/PR	2.92105
	Monotherapy		116(96.7)		MEL-IPI_Pat16-TP-NT-SM-53U3E-SM-53U5B	0	68	FEMALE	PD	27.0333	0	2.26667	0	cutaneous	Monotherapy	no	CR/PR	50.8684
	Combotherapy		4(3.3)		MEL-IPI_Pat157-TP-NB-SM-7A15B-SM-5VWIH	0	69	FEMALE	NA	2.86667	0	2.3	0	cutaneous	Monotherapy	no	CR/PR	3.63158
Receive other treatments at the same time					MEL-IPI_Pat55-TP-NB-SM-4DK2G-SM-4NFVM	0	71	FEMALE	PD	6.43333	0	2.33333	0	cutaneous	Monotherapy	no	CR/PR	14.0526
	N		120		MEL-IPI_Pat24-TP-NT-SM-4DK1K-SM-53U5J	1	74	FEMALE	PR	32.3667	0	2.4	1	cutaneous	Monotherapy	no	CR/PR	1
	Yes		3(2.5)		MEL-IPI_Pat43-TP-NB-SM-4DK24-SM-4NFVA	0	75	FEMALE	PD	1.23333	0	2.43333	0	cutaneous	Monotherapy	no	CR/PR	5.92105
	No		117(97.5)		CR04885_T_N	0		FEMALE	CR	25.55	0	2.43333	NA	cutaneous	Monotherapy	no	CR/PR	52.7895
Status					CR06670_T_N	0		FEMALE	CR	45.0167	0	2.46667	NA	cutaneous	Monotherapy	no	CR/PR	16.7632
	N		120		CR1509_T_N	1		FEMALE	CR	54.75	0	2.5	NA	cutaneous	Monotherapy	no	CR/PR	15.6842
	Alive		53(44.2)		CR6126_T_N	0		FEMALE	CR	23.5667	0	2.53333	NA	cutaneous	Monotherapy	no	CR/PR	15.2105
	Dead		67(55.8)		DFCI_MM_2-TP-NB-SM-BZRJA-SM-BZRJD	0		FEMALE	CR	12.1667	0	2.53333	0	cutaneous	Monotherapy	no	CR/PR	31.5526
OS(Month)					MEL-582186-TP-NB-SM-CN21Q-SM-CJP7T	0		FEMALE	PR	13.8333	0	2.56667	0	cutaneous	Monotherapy	no	PD/SD	1.55263
	N		120		MEL-682321-TP-NB-SM-CN21G-SM-CJP7S	1		FEMALE	PR	14.9	0	2.56667	1	cutaneous	Monotherapy	no	PD/SD	27
	Mean+sd		20.0±16.3		LSD2057_T_N	0		FEMALE	SD	40.15	0	2.56667	NA	cutaneous	Monotherapy	no	PD/SD	4.65789
	Min-Max		1.233333333-84.23333333		MEL-650366-TP-NB-SM-CN221-SM-CJP7U	0		FEMALE	PD	26.4667	0	2.56667	0	cutaneous	Monotherapy	no	PD/SD	6.07895
	Median(Q1-Q3)		15.4(6.433333333-30.783333335)		NR4810_T_N	0		FEMALE	PD	4.86667	0	2.56667	1	cutaneous	Monotherapy	no	PD/SD	10.1579
PFS(Month)					NR8815_T_N	0		FEMALE	PD	14.6	0	2.6	1	cutaneous	Monotherapy	no	PD/SD	45.5
	N		120		NR9449_T_N	0		FEMALE	PD	7.3	0	2.63333	1	cutaneous	Monotherapy	no	PD/SD	7.92105
	Mean+sd		9.7±12.7		NR9705_T_N	0		FEMALE	PD	14.6	0	2.66667	1	cutaneous	Monotherapy	no	PD/SD	0.710526
	Min-Max		1.033333333-84.23333333		NR9765_T_N	0		FEMALE	PD	25.55	0	2.7	1	cutaneous	Monotherapy	no	PD/SD	2.15789
	Median(Q1-Q3)		3.7166666665(2.566666667-13.525)		SD0346_T_N	1		FEMALE	SD	35.2833	0	2.7	1	cutaneous	Monotherapy	no	PD/SD	15.4211
					SD2051_T_N	0		FEMALE	SD	9.73333	0	2.7	1	cutaneous	Monotherapy	no	PD/SD	0.947368
					SD2056_T_N	0		FEMALE	SD	48.5333	0	2.76667	1	cutaneous	Monotherapy	no	PD/SD	4.10526
					SD5118_T_N	0		FEMALE	SD	32.85	0	2.8	1	cutaneous	Monotherapy	no	PD/SD	1.94737
					MEL-IPI_Pat129-TP-NT-SM-5X2R7-SM-5X2RI	0	18	MALE	PD	17.9667	0	2.8	1	cutaneous	Monotherapy	no	PD/SD	3
					MEL-IPI_Pat83-TP-NT-SM-53U2W-SM-53U56	0	22	MALE	PD	34.2333	0	2.8	0	cutaneous	Monotherapy	no	PD/SD	1.5
					MEL-IPI_Pat128-TP-NB-SM-5X2R6-SM-5VWHQ	0	30	MALE	PD	3.76667	0	2.8	0	cutaneous	Monotherapy	no	PD/SD	2.15789
					MEL-IPI_Pat15-TP-NB-SM-4DK1B-SM-4NFUH	0	32	MALE	PD	1.66667	0	2.8	0	cutaneous	Monotherapy	no	PD/SD	6.71053
					MEL-IPI_Pat06-TP-NB-SM-4DK12-SM-4NFU8	0	33	MALE	PD	5.36667	0	2.8	0	cutaneous	Monotherapy	no	PD/SD	4.05263
					MEL-IPI_Pat07-TP-NB-SM-4DK13-SM-4NFU9	0	35	MALE	SD	35	0	2.83333	1	cutaneous	Monotherapy	no	PD/SD	4.73684
					MEL-IPI_Pat49-TP-NT-SM-4DK2A-SM-53U5W	0	36	MALE	SD	34.4667	0	2.83333	0	cutaneous	Monotherapy	no	PD/SD	18.1579
					MEL-IPI_Pat59-TP-NB-SM-4DK2K-SM-4NFVQ	0	36	MALE	PD	7.46667	0	2.96667	0	cutaneous	Monotherapy	no	PD/SD	7.36842
					MEL-IPI_Pat67-TP-NB-SM-4DK2S-SM-4NFVY	0	40	MALE	PD	2.63333	0	3	0	cutaneous	Monotherapy	no	PD/SD	0.815789
					MEL-IPI_Pat105-TP-NT-SM-4CU6S-SM-53U4R	0	41	MALE	PR	34.9	0	3	1	cutaneous	Monotherapy	no	PD/SD	3.81579
					MEL-IPI_Pat12-TP-NB-SM-7459O-SM-4NFUE	0	41	MALE	PD	9.66667	0	3.03333	0	cutaneous	Monotherapy	no	PD/SD	2.71053
					MEL-IPI_Pat17-TP-NB-SM-4DK1D-SM-4NFUJ	0	44	MALE	PD	6.83333	0	3.2	0	cutaneous	Monotherapy	no	PD/SD	5.65789
					MEL-IPI_Pat115-TP-NT-SM-5X2QS-SM-5X2RA	0	46	MALE	PD	4.83333	0	3.23333	0	cutaneous	Monotherapy	no	PD/SD	1.94737
					MEL-IPI_Pat80-TP-NT-SM-4DK36-SM-53U53	0	47	MALE	SD	24.1333	0	3.26667	0	cutaneous	Monotherapy	no	PD/SD	6
					MEL-IPI_Pat87-TP-NT-SM-4DK3D-SM-53U5A	0	47	MALE	PD	36.4333	0	3.3	0	cutaneous	Monotherapy	no	PD/SD	1.07895
					MEL-IPI_Pat170-TP-NB-SM-5VOAZ-SM-5VWIU	0	48	MALE	PD	3.6	0	3.33333	0	cutaneous	Monotherapy	no	PD/SD	5.97368
					MEL-IPI_Pat167-TP-NB-SM-7A15H-SM-5VWIR	0	50	MALE	PD	13.6	0	3.46667	0	cutaneous	Monotherapy	no	PD/SD	1.60526
					MEL-IPI_Pat159-TP-NB-SM-5VWK2-SM-5VWIJ	0	52	MALE	PD	28.0667	0	3.53333	1	cutaneous	Monotherapy	no	PD/SD	15.2368
					MEL-IPI_Pat86-TP-NT-SM-4DK3C-SM-53U59	0	54	MALE	SD	9.76667	0	3.56667	0	cutaneous	Monotherapy	no	PD/SD	2.15789
					MEL-IPI_Pat139-TP-NB-SM-5VWJH-SM-5VWHY	0	58	MALE	PD	3.3	0	3.6	0	cutaneous	Monotherapy	no	PD/SD	37.2105
					MEL-IPI_Pat90-TP-NB-SM-4DK3G-SM-4NFWM	0	59	MALE	PR	33.5	0	3.7	1	cutaneous	Monotherapy	no	PD/SD	5.97368
					MEL-IPI_Pat119-TP-NT-SM-7459N-SM-7459Q	0	61	MALE	PD	26.9333	0	3.73333	1	cutaneous	Monotherapy	no	PD/SD	8.39474
					MEL-IPI_Pat27-TP-NB-SM-4DK1N-SM-4NFUT	0	61	MALE	PD	45.9667	0	3.73333	0	cutaneous	Monotherapy	no	PD/SD	1.26316
					MEL-IPI_Pat140-TP-NB-SM-5VWJI-SM-5VWHZ	0	62	MALE	PD	16.4	0	3.73333	0	cutaneous	Monotherapy	no	PD/SD	8.84211
					MEL-IPI_Pat41-TP-NT-SM-4DK22-SM-53U5O	0	64	MALE	PD	4.26667	0	3.8	0	cutaneous	Monotherapy	no	PD/SD	9.57895
					MEL-IPI_Pat144-TP-NB-SM-7A157-SM-5VWI4	1	65	MALE	PR	29	0	4	0	cutaneous	Monotherapy	no	PD/SD	7.15789
					MEL-IPI_Pat52-TP-NT-SM-4DK2D-SM-53U5Z	0	65	MALE	PD	6.3	0	4	0	cutaneous	Monotherapy	no	PD/SD	10.4737
					MEL-IPI_Pat171-TP-NB-SM-7A15J-SM-5VWIV	0	66	MALE	PD	15.5333	0	4.46667	0	cutaneous	Monotherapy	no	PD/SD	2.36842
					MEL-IPI_Pat39-TP-NB-SM-4DK1Z-SM-4NFV6	0	67	MALE	CR	49.5667	1	4.56667	1	cutaneous	Monotherapy	no	PD/SD	2.10526
					MEL-IPI_Pat151-TP-NB-SM-7A15A-SM-5VWIB	0	68	MALE	PD	6.8	1	4.63333	0	cutaneous	Monotherapy	no	PD/SD	68.8158
					MEL-IPI_Pat56-TP-NB-SM-4DK2H-SM-4NFVN	0	68	MALE	PD	7.83333	1	5.03333	0	cutaneous	Monotherapy	no	PD/SD	1.47368
					MEL-IPI_Pat79-TP-NB-SM-53U2S-SM-4NFWB	0	69	MALE	PR	26.7	1	5.1	0	cutaneous	Monotherapy	no	PD/SD	8.15789
					MEL-IPI_Pat168-TP-NB-SM-5VOAX-SM-5VWIS	0	69	MALE	NA	2.23333	1	5.13333	0	cutaneous	Monotherapy	no	PD/SD	7.13158
					MEL-IPI_Pat45-TP-NT-SM-4DK26-SM-53U5R	0	69	MALE	PD	2.96667	1	5.36667	0	cutaneous	Monotherapy	no	PD/SD	24.8947
					MEL-IPI_Pat57-TP-NB-SM-4DK2I-SM-4NFVO	0	69	MALE	PD	8.33333	1	5.43333	0	cutaneous	Monotherapy	no	PD/SD	1.76316
					MEL-IPI_Pat04-TP-NB-SM-4DJZZ-SM-4NFU6	0	71	MALE	PR	32.9	1	5.6	1	cutaneous	Monotherapy	no	PD/SD	11
					MEL-IPI_Pat73-TP-NB-SM-4DK2Y-SM-4NFW5	0	71	MALE	PR	14.7333	1	5.6	0	cutaneous	Monotherapy	no	PD/SD	6.15789
					MEL-IPI_Pat100-TP-NT-SM-53U2D-SM-53U4M	0	71	MALE	PD	12	1	6.06667	0	cutaneous	Monotherapy	no	PD/SD	14.7368
					MEL-IPI_Pat143-TP-NB-SM-7A156-SM-5VWI3	1	71	MALE	PD	5.1	1	6.06667	0	cutaneous	Monotherapy	no	PD/SD	24.9737
					MEL-IPI_Pat134-TP-NB-SM-5VWJC-SM-5VWHT	0	73	MALE	PD	10.0667	1	6.2	0	cutaneous	Monotherapy	no	PD/SD	10.5
					MEL-IPI_Pat54-TP-NB-SM-4DK2F-SM-4NFVL	0	73	MALE	PD	6.93333	1	6.23333	0	cutaneous	Monotherapy	no	PD/SD	23.8684
					MEL-IPI_Pat74-TP-NB-SM-4DK2Z-SM-4NFW6	0	73	MALE	PD	6.43333	1	6.23333	0	cutaneous	Monotherapy	no	PD/SD	14.2368
					MEL-IPI_Pat117-TP-NT-SM-5X2QU-SM-5X2RC	0	74	MALE	PR	30.4667	1	6.76667	1	cutaneous	Monotherapy	no	PD/SD	18.8947
					MEL-IPI_Pat101-TP-NT-SM-4CU6O-SM-53U4N	0	75	MALE	PD	9.6	1	7.9	0	cutaneous	Monotherapy	no	PD/SD	1.89474
					MEL-IPI_Pat110-TP-NT-SM-4CU6X-SM-4MGPO	1	76	MALE	PD	10.6667	1	9.8	0	cutaneous	Monotherapy	no	PD/SD	173.289
					MEL-IPI_Pat62-TP-NB-SM-4DK2N-SM-4NFVT	1	76	MALE	PD	20.0667	1	10.7667	0	cutaneous	Monotherapy	no	PD/SD	45.1316
					MEL-IPI_Pat126-TP-NB-SM-5X2R4-SM-5VWHO	0	77	MALE	PR	21.3667	1	11.2	1	cutaneous	Monotherapy	no	PD/SD	11.3158
					MEL-IPI_Pat50-TP-NT-SM-53U69-SM-53U5X	0	77	MALE	PD	2.16667	1	11.9	0	cutaneous	Monotherapy	no	PD/SD	11.8684
					MEL-IPI_Pat47-TP-NT-SM-4DK28-SM-53U5U	0	78	MALE	CR	36.8667	1	12.1333	1	cutaneous	Monotherapy	no	PD/SD	4.10526
					MEL-IPI_Pat124-TP-NB-SM-7459L-SM-5VWHM	0	78	MALE	PD	4.86667	1	12.1667	0	cutaneous	Monotherapy	no	PD/SD	10.7895
					MEL-IPI_Pat13-TP-NB-SM-4DK19-SM-4NFUF	0	78	MALE	PD	24.4	1	13.5	0	cutaneous	Monotherapy	no	PD/SD	3.42105
					MEL-IPI_Pat160-TP-NB-SM-5VWK3-SM-5VWIK	0	79	MALE	PD	5.06667	1	13.6	0	cutaneous	Monotherapy	no	PD/SD	1.44737
					MEL-IPI_Pat132-TP-NB-SM-5VWJA-SM-5VWHR	0	81	MALE	PR	22.5333	1	14.9	1	cutaneous	Monotherapy	no	PD/SD	61.1316
					MEL-IPI_Pat21-TP-NT-SM-4DK1H-SM-53U5G	0	81	MALE	SD	22.5333	1	14.9333	0	cutaneous	Monotherapy	no	PD/SD	38.1842
					MEL-IPI_Pat64-TP-NB-SM-4DK2P-SM-4NFVV	0	83	MALE	PD	3.53333	1	15.1667	0	cutaneous	Monotherapy	no	PD/SD	17.8684
					MEL-IPI_Pat85-TP-NB-SM-53U2Y-SM-4NFWH	1	83	MALE	PD	15.2667	1	15.5667	0	cutaneous	Monotherapy	no	PD/SD	14.0526
					MEL-IPI_Pat111-TP-NT-SM-4CU6Y-SM-4MGPP	0	84	MALE	PD	20.6	1	15.6333	0	cutaneous	Monotherapy	no	PD/SD	36.8158
					MEL-IPI_Pat60-TP-NB-SM-4DK2L-SM-4NFVR	1	86	MALE	PD	9.06667	1	15.8667	0	cutaneous	Monotherapy	no	PD/SD	20.5789
					CR0095_T_N	1		MALE	CR	69.35	1	16.8	NA	cutaneous	Monotherapy	no	PD/SD	7.39474
					CR22640_T_N	0		MALE	CR	52.3167	1	17.0333	NA	cutaneous	Monotherapy	no	PD/SD	9.23684
					CR3665_T_N	0		MALE	CR	32.85	1	18.6	NA	cutaneous	Monotherapy	no	PD/SD	4.21053
					CR6161_T_N	0		MALE	CR	31.7333	1	18.6667	NA	cutaneous	Monotherapy	no	PD/SD	22.4737
					CR9306_T_N	0		MALE	CR	64.4833	1	19.3667	NA	cutaneous	Monotherapy	no	PD/SD	38.0263
					CR9699_T_N	1		MALE	CR	53.5333	1	19.8333	NA	cutaneous	Monotherapy	no	PD/SD	34.8684
					PR12117_T_N	0		MALE	PR	19.4667	1	19.9333	1	cutaneous	Monotherapy	no	PD/SD	30.0526
					LSD0167_T_N	0		MALE	SD	32.85	1	21.5333	NA	cutaneous	Monotherapy	no	PD/SD	11.2105
					LSD3484_T_N	0		MALE	SD	35.9333	1	21.9333	NA	cutaneous	Monotherapy	no	PD/SD	14.1316
					LSD4744_T_N	0		MALE	SD	25.55	1	22.3	NA	cutaneous	Monotherapy	no	PD/SD	30.0263
					LSD6819_T_N	0		MALE	SD	41.3667	1	23	NA	cutaneous	Monotherapy	no	PD/SD	5.63158
					MEL-587761-TP-NB-SM-CN1ZV-SM-CJP7Q	1		MALE	SD	19.4667	1	23.5667	0	cutaneous	Monotherapy	no	PD/SD	5.10526
					NR1867_T_N	0		MALE	PD	18.25	1	24.0333	1	cutaneous	Monotherapy	no	PD/SD	2.34211
					NR2137_T_N	0		MALE	PD	9.73333	1	24.3667	1	cutaneous	Monotherapy	no	PD/SD	17.0789
					NR3549_T_N	0		MALE	PD	6.08333	1	31.7333	1	cutaneous	Monotherapy	no	PD/SD	10.8947
					NR4045_T_N	0		MALE	PD	20.6833	1	32.6667	1	cutaneous	Monotherapy	no	PD/SD	11.7632
					NR4631_T_N	0		MALE	PD	6.08333	1	35.9333	1	cutaneous	Monotherapy	no	PD/SD	30.5526
					NR9445_T_N	0		MALE	PD	2.43333	1	36.8667	1	cutaneous	Monotherapy	no	PD/SD	6.97368
					NR9521_T_N	0		MALE	PD	32.85	1	39.2	1	cutaneous	Monotherapy	no	PD/SD	29.0263
					SD1494_T_N	0		MALE	SD	24.3333	1	48.5333	1	cutaneous	Monotherapy	no	PD/SD	24.8158
					SD5038_T_N	0		MALE	SD	14.6	1	49.5667	1	cutaneous	Monotherapy	yes	PD/SD	7.57895
					SD5934_T_N	0		MALE	SD	19.4667	1	50.4	1	cutaneous	Monotherapy	yes	PD/SD	4.47368
					SD6336_T_N	0		MALE	SD	84.2333	1	84.2333	1	cutaneous	Monotherapy	yes	response	9.36842

## Sheet: Sheet2
Table S2.Comparison of clinical data of patients in the FSIP2-MT group and FSIP2-WT group in the ICI treated cohort
Variables		FSIP2-MT (N=15)	FSIP2-WT (N=105)	P Value	Overall (N=120)
Age at diagnosis				0.04728
	N	9	70		79
	Mean+sd	69.3±14.8	57.9±16.9		53.5±15.1
	Min-Max	39-86	18-84		18-75
	Median(Q1-Q3)	74(65-76)	61(44-71)		57(43-68)
Sex				0.560572
	N	15	105		120
	Female	6(40.0)	33(31.4)		39(32.5)
	Male	9(60.0)	72(68.6)		81(67.5)
Response				0.10112
	N	15	105		120
	PR/CR	6(40.0)	21(20.0)		27(22.5)
	SD/PD	9(60.0)	84(80.0)		93(77.5)
Drug Type				0.075773
	N	15	105		120
	Monotherapy	13(86.7)	103(98.1)		116(96.7)
	Combotherapy	2(13.3)	2(1.9)		4(3.3)
Receive other treatments at the same time				0.269164
	N	15	105		120
	Yes	1(6.7)	2(1.9)		3(2.5)
	No	14(93.3)	103(98.1)		117(97.5)
Status				0.728287
	N	15	105		120
	Dead	6(40.0)	47(44.8)		53(44.2)
	Alive	9(60.0)	58(55.2)		67(55.8)
OS(Month)				0.039251
	N	15	105		120
	Mean+sd	28.1±20.5	18.9±15.4		20.0±16.3
	Min-Max	3.5-69.4	1.2-84.2		1.2-84.2
	Median(Q1-Q3)	20.1(12.8-42.3)	14.6(6.3-27.0)		15.4(6.4-30.8)
PFS(Month)				0.580359
	N	15	105		120
	Mean+sd	10.9±8.0	9.5±13.3		9.7±12.7
	Min-Max	2.4-24.4	1.0-84.2		1.0-84.2
	Median(Q1-Q3)	12.1(2.9-16.3)	3.6(2.6-11.2)		3.7(2.6-13.5)
